# Supplementary material for: Marine natural products
Source: Royal Society of Chemistry journal article supplement (doi:10.1039/d2np00083k), 2023-01-01
Supplement: d2np00083k1.pdf [file d2np00083k1.pdf]

[Marine natural products \(2021\) D2NP00083K](#)

**Supplementary Information**

**Anthony R. Carroll, Brent R. Copp, Rohan A. Davis, Robert A. Keyzers and Michèle R. Prinsep**

|           |                                                            |            |
|-----------|------------------------------------------------------------|------------|
| <b>1</b>  | <b>Introduction</b>                                        | <b>2</b>   |
|           | <b>1.1 Abbreviations</b>                                   | <b>3</b>   |
|           | <b>1.2 Bioactivity categories</b>                          | <b>4</b>   |
| <b>2</b>  | <b>Marine microorganisms and phytoplankton</b>             |            |
|           | <b>2.1 Marine-sourced bacteria</b>                         | <b>5</b>   |
|           | <b>2.2 Cyanobacteria</b>                                   | <b>22</b>  |
|           | <b>2.3 Marine-sourced fungi (excluding from mangroves)</b> | <b>35</b>  |
|           | <b>2.4 Fungi from mangroves</b>                            | <b>63</b>  |
|           | <b>2.5 Dinoflagellates</b>                                 | <b>67</b>  |
| <b>3</b>  | <b>Green algae</b>                                         | <b>70</b>  |
| <b>4</b>  | <b>Brown algae</b>                                         | <b>71</b>  |
| <b>5</b>  | <b>Red algae</b>                                           | <b>74</b>  |
| <b>6</b>  | <b>Sponges</b>                                             | <b>76</b>  |
| <b>7</b>  | <b>Cnidaria</b>                                            | <b>91</b>  |
| <b>9</b>  | <b>Molluscs</b>                                            | <b>107</b> |
| <b>10</b> | <b>Tunicates (ascidians)</b>                               | <b>110</b> |
| <b>11</b> | <b>Echinoderms</b>                                         | <b>111</b> |
| <b>12</b> | <b>Miscellaneous</b>                                       | <b>116</b> |

## 1 Introduction

In the main Review document, only the structures of a selection of highlighted compounds are shown. However, *all* structures are available for viewing, along with names, taxonomic origins, locations, biological activities and other information in this Supplementary Information (SI) document. Each page of the SI document contains at least one array of numbered structures. The numbers are those assigned in the Review document. For structures that have their absolute configurations fully described, the compound number in the diagrams is preceded with the † symbol. Below each structural array, the relevant information for each reference and associated compounds is listed. The first line contains the **Main article reference** #, followed by **Taxonomy**, **Location** and **Article title**. Each section is separated by the // symbol. The following indented line(s) provide information about each compound referred to in the Review for that publication. This information is

provided in the following order, again separated by the // symbol (\* is inserted where there are no data): **Compound number**, **Status** (**N** for a new compound; **M** for new to marine; **R** for a revision (structure, stereochemistry, stereochemical assignment etc)), **Compound name**, **Biological activity** and **Other information**. To assist viewing, these headings are noted in the footer at the bottom of each page. To conserve space, the **Title** and **Location** data may have been abbreviated, and are not as complete as in the source, [MarinLit](#). Most **Main article reference** numbers are hyperlinked to the relevant DOI or URL. Where those are not available, the full reference is given in a brief Bibliography at the end of this SI document.

## 1.1 Abbreviations

In the **Biological activity and other information** section, the following abbreviations have been used:

|                |                                               |                      |                                                     |
|----------------|-----------------------------------------------|----------------------|-----------------------------------------------------|
| abs. config.   | absolute configuration                        | Mtb                  | <i>Mycobacterium tuberculosis</i>                   |
| AChE           | acetylcholine esterase                        | Mptp                 | <i>M. tuberculosis</i> protein tyrosine phosphatase |
| activ.         | activity                                      | mod.                 | moderate                                            |
| ABCA1          | ATP-binding cassette transporter A1           | microb.              | microbial, microbe                                  |
| anti-inflam.   | antiinflammatory                              | mixt.                | mixture                                             |
| antioxid.      | antioxidant                                   | NO                   | nitrous oxide                                       |
| bact.          | bacteria                                      | norm.                | normal                                              |
| BChE           | butylcholine esterase                         | nHCL                 | normal human cell line                              |
| Cbl-b          | casitas B-lineage lymphoma proto-oncogene-b   | nMCL                 | normal mammalian cell line                          |
| CL             | cell line                                     | NT                   | not tested                                          |
| ConA           | concanavalin A                                | PGE <sub>2</sub>     | prostaglandin E2                                    |
| COX-2          | cyclooxygenase-2                              | <i>P. falciparum</i> | <i>Plasmodium falciparum</i>                        |
| cytotox.       | cytotoxicity/cytotoxic                        | prod.                | production                                          |
| degrad.        | degradation                                   | PKS                  | polyketide synthase                                 |
| depolaris.     | depolarisation                                | pot.                 | potent                                              |
| <i>h</i> DHODH | human dihydroorotate dehydrogenase            | prod.                | production                                          |
| DRG            | dorsal root ganglia                           | purif.               | purify/purified                                     |
| DPPH           | 2,2-diphenyl-1-picrylhydrazyl                 | PR1                  | pathogenesis-related protein 1                      |
| DPP4           | dipeptidyl peptidase-4                        | PTP1B                | protein-tyrosine phosphatase 1B                     |
| enant.         | enantiomer                                    | PTP                  | protein-tyrosine phosphatase                        |
| HSV-1          | herpes simplex virus 1                        | QS                   | quorum sensing                                      |
| HTCL           | human tumour cell line                        | Rac.                 | Racemic mixture                                     |
| hTRPA1         | human transient receptor potential subtype A1 | ref.                 | reference                                           |
| hum.           | human                                         | Srt A                | sortase A lyase                                     |
| IL6            | interleukin 6                                 | <i>S. aureus</i>     | <i>Staphylococcus aureus</i>                        |
| IA             | inactive                                      | stereochem.          | stereochemistry                                     |
| inhib.         | inhibitor/inhibition/inhibitory               | struct.              | structure                                           |
| iNOS           | inosine-5'-monophosphate dehydrogenase        | synth.               | synthesis/synthetic                                 |
| insep.         | inseparable                                   | TCL                  | tumour cell line                                    |
| immunomod.     | immunomodulatory                              | TCPTP                | T cell protein tyrosine phosphatase                 |
| isol.          | isolated                                      | TDDFT                | time dependent density functional theory            |
| ICL            | isocitrate lyase                              | TGF                  | tissue growth factor                                |
| LPS            | lipopolysaccharide                            | TNBC                 | triple negative breast cancer                       |
| LXR            | liver X receptor                              | TNF- $\alpha$        | tumour necrosis factor alpha                        |
| MAPK           | mitogen-activated protein kinase              | XRD                  | X-ray diffraction analysis                          |
| MIC            | minimum inhibitory concentration              |                      |                                                     |

## 1.2 Biological activity definitions

Cytotoxic, antiparasitic, antioxidant, antiinflammatory, enzyme and antiviral activity ( $IC_{50} < 10 \mu M$ ); any activity reported at a higher dose is deemed inactive (IA)

Potent (pot.) activity:  $IC_{50} < 100 \text{ nM}$

Moderate (mod.) activity:  $IC_{50} < 1 \mu M$

Weak activity:  $IC_{50} < 10 \mu M$

Antibacterial and antifungal activity ( $MIC < 32 \mu g/ml$ ,  $< 64 \mu M$  based on MW 500 Da); any activity reported at a higher dose is deemed inactive (IA)

Potent (pot.) activity:  $MIC < 1 \mu g/ml$

Moderate (mod.) activity:  $MIC < 8 \mu g/ml$

Weak activity:  $MIC < 32 \mu g/ml$

## 2 Marine microorganisms and phytoplankton:

### 2.1 Marine-sourced bacteria

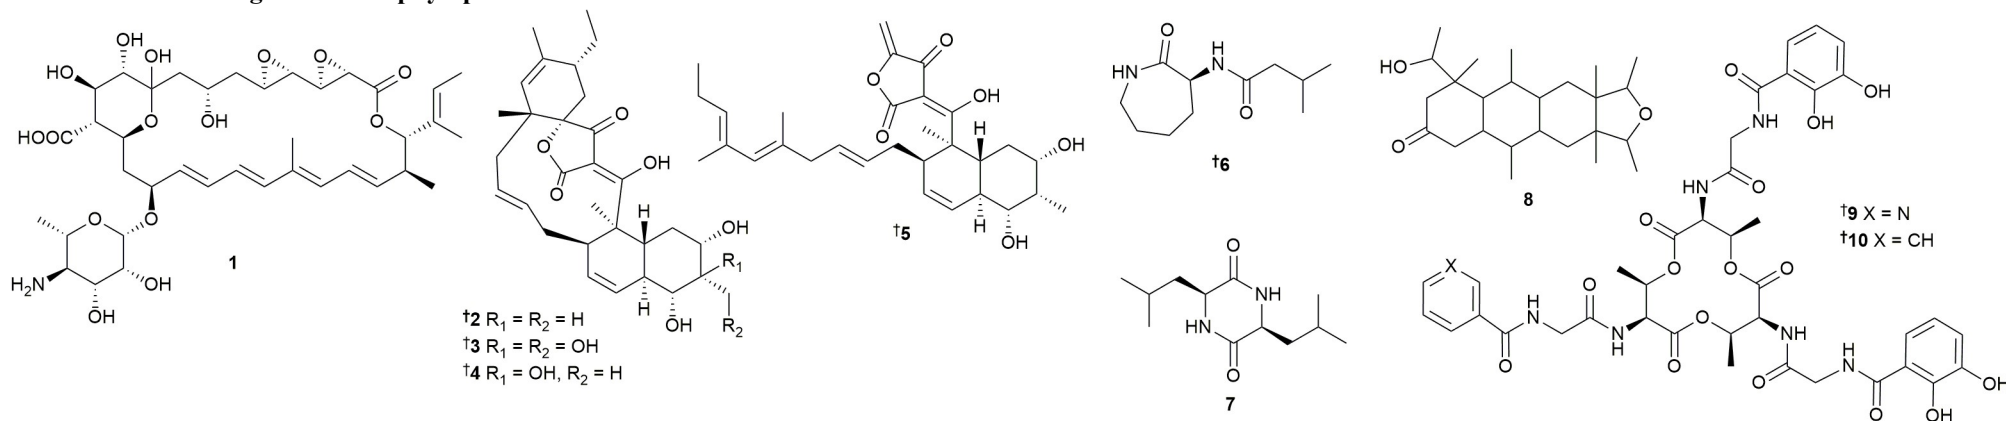

- 3** Actinobacteria *Actinokineospora spheciospongiae* // \* // The discovery of actinospene, a new polyene macrolide with broad activity against plant fungal pathogens and pathogenic yeasts  
**1** // N // actinospene // IA to pot. activ. vs 9 fungal strains; IA vs 2 bact. strains.
- 4** Actinobacteria *Actinomadura* sp // Sagami Bay, Japan // Nomimicins B–D, new tetronate-class polyketides from a marine-derived actinomycete of the genus *Actinomadura*  
**2** // M // nomimicin A // NT.  
**3** // N // nomimicin B // IA to mod. activ. vs 5 bact. strains; IA vs 1 fungal strain; IA vs 1 HTCL.  
**4** // N // nomimicin C // IA to mod. activ. vs 5 bact. strains; IA vs 1 fungal strain; IA vs 1 HTCL.  
**5** // N // nomimicin D // IA to mod. activ. vs 5 bact. strains; IA vs 1 fungal strain; IA vs 1 HTCL.
- 5** Bacteroidetes *Aquimarina* sp // Kosrae, Federated States of Micronesia // Inhibition of A549 lung cancer cell migration and invasion by ent-caprolactin C *via* the suppression of transforming growth factor- $\beta$ -induced epithelial—mesenchymal transition  
**6** // N // caprolactin C // IA vs 1 HTCL; weak migration and invasion inhib.
- 6** Firmicutes *Bacillus* sp // Palk Bay of Bengal, Mandapam coast, Tamil Nadu, India // Structural elucidation and antimicrobial activity of a diketopiperazine isolated from a *Bacillus* sp. associated with the marine sponge *Spongia officinalis*  
**7** // M // (3*S*,6*S*)-3,6-diisobutylpiperazine-2,5-dione // weak activ. vs 2 bact. strains.
- 7** Firmicutes *Bacillus* sp // Mangalavanam, Cochin, India // Isolation and characterization of a novel antimicrobial oxatetracyclo ketone from *Bacillus stercoris* MBTDCMFRI Ba37 isolated from the tropical estuarine habitats of Cochin  
**8** // N // 1-(1-hydroxyethyl)-1,7,10,12,13,15,17-heptamethyl-16-oxatetracyclo[8.7.0.0.2,3.0.12,13]heptadecan-5-one // questionable structure.
- 8** Firmicutes *Bacillus* sp // Ramrod Key, Florida, USA // Bacillibactins E and F from a marine sponge-associated *Bacillus* sp.  
**9** // N // bacillibactin E // weak siderophoric activ.  
**10** // N // bacillibactin F // weak siderophoric activ.

2 Marine microorganisms and phytoplankton: 2.1 Marine-sourced bacteria

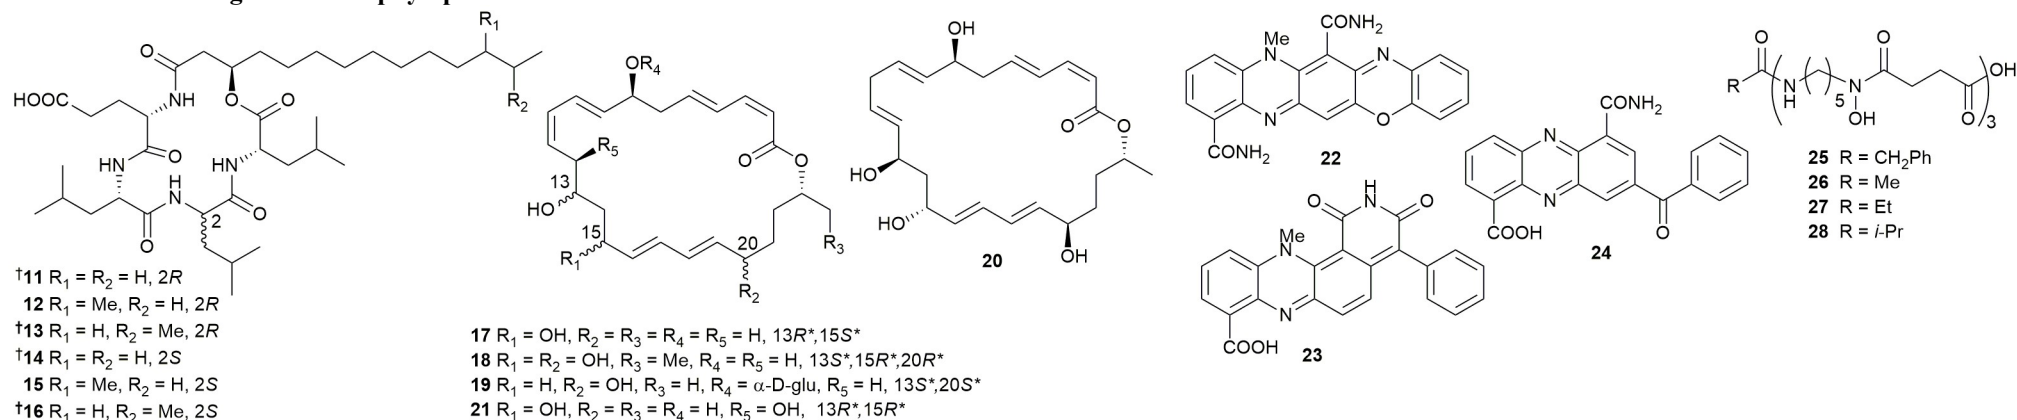

- 9 Firmicutes *Bacillus subtilis* // Gageo reef, Republic of Korea // Anti-mycoplasma activity of bacilotetrins C–E, cyclic lipodepsipeptides from the marine-derived *Bacillus subtilis* and structure revision of bacilotetrins A and B  
 11 // N // bacilotetrin C // weak activ. vs 1 bact. strain.  
 12 // N // bacilotetrin D // weak activ. vs 1 bact. strain.  
 13 // N // bacilotetrin E // weak activ. vs 1 bact. strain.  
 14 // R // bacilotetrin A // NT.  
 15 // R // bacilotetrin B // NT; obtained as a mixture of 2 bacilotetrin B isomers  
 16 // R // bacilotetrin B // NT; obtained as a mixture of 2 bacilotetrin B isomers
- 10 Firmicutes *Bacillus siamensis* // Beihai city, Guangxi, China // New 24-membered macrolactins isolated from marine bacteria *Bacillus siamensis* as potent fungal inhibitors against sugarcane smut  
 17 // N // bamemacrolactin A // weak inhib. of fungal spore germination; IA vs mycelium growth.  
 18 // N // bamemacrolactin B // weak inhib. of fungal spore germination; IA vs mycelium growth.  
 19 // N // bamemacrolactin C // mod. inhib. of fungal spore germination; mod. activ. vs mycelium growth.  
 20 // N // bamemacrolactin D // weak inhib. of fungal spore germination; IA vs mycelium growth.  
 21 // N // bamemacrolactin E // weak inhib. of fungal spore germination; IA vs mycelium growth.
- 11 Actinobacteria *Dermacoccus abyssi* // Mariana Trench // Dermacozine N, the first natural linear pentacyclic oxazinophenazine with UV–Vis absorption maxima in the near infrared region, along with dermacozines O and P isolated from the Mariana Trench sediment strain *Dermacoccus abyssi* MT 1.1T  
 22 // N // dermacozine N // IA vs 5 HTCLs.  
 23 // N // dermacozine O // IA vs 5 HTCLs.  
 24 // N // dermacozine P // NT.
- 12 Bacteroidetes, *Fulvivirga* sp // Aoshan Bay, Qingdao, China, // Genome Mining and Biosynthesis of Primary Amine-Acylated Desferrioxamines in a Marine Gliding Bacterium  
 25 // N // fulvivirgamide A2 // IA to weak cytotox. vs 3 HTCLs.  
 26 // N // fulvivirgamide B2 // IA to weak cytotox. vs 3 HTCLs.  
 27 // N // fulvivirgamide B3 // IA to weak cytotox. vs 3 HTCLs.  
 28 // N // fulvivirgamide B4 // NT.

## 2 Marine microorganisms and phytoplankton:

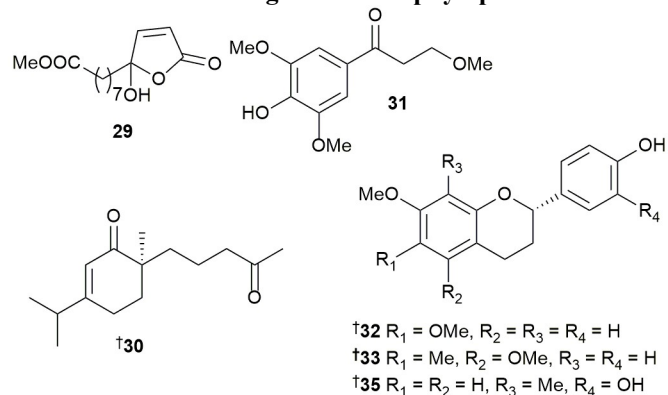

## 2.1 Marine-sourced bacteria

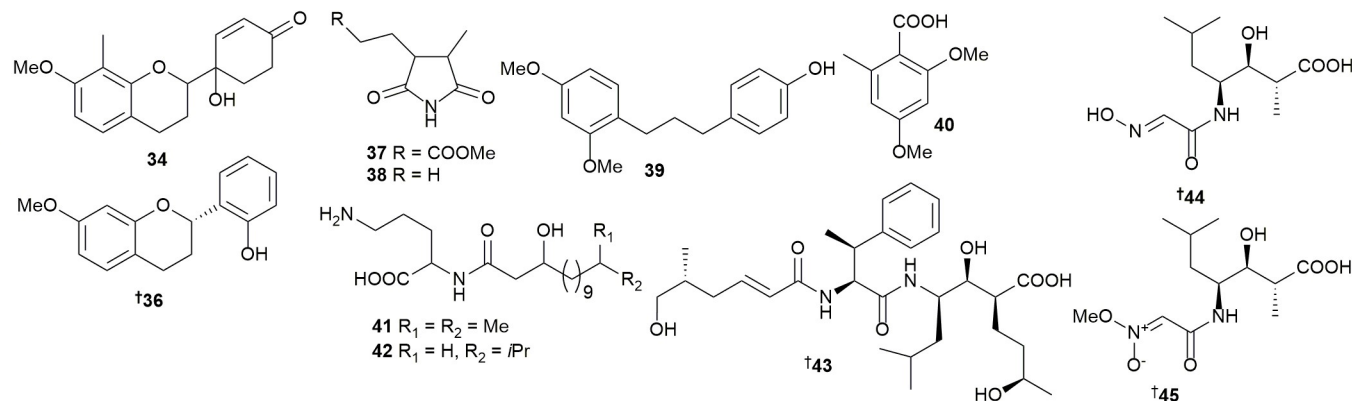

- 13** Actinobacteria *Isoptericola chiayiensis* // Chiayi County, Taiwan // Chemical constituents from a mangrove-derived actinobacteria *Isoptericola chiayiensis* BCRC 16888 and evaluation of their anti-NO activity  
**29** // N // isopterfuranone // NT.  
**30** // N // isopterchiayione // IA vs NO prod.  
**31** // N // isopterinoide // NT.  
**32** // N // chiayiflavan A // IA vs NO prod.  
**33** // N // chiayiflavan B // weak activ. vs NO prod.  
**34** // N // chiayiflavan C // IA vs NO prod.  
**35** // N // chiayiflavan D // IA vs NO prod.  
**36** // N // chiayiflavan E // IA vs NO prod.  
**37** // M // methyl 3-(4-methyl-2,5-dioxopyrrolidin-3-yl)propanoate // NT.  
**38** // M // 3-ethyl-4-methylpyrrolidine-2,5-dione // NT.  
**39** // M // chiayiensiol // IA vs NO prod.  
**40** // M // chiayiensiic acid // IA vs NO prod.  
**14** Bacteroidetes *Lacinutrix* sp // Barents Sea // Two novel lyso-ornithine lipids isolated from an Arctic marine *Lacinutrix* sp. bacterium  
**41** // N // 5-amino-2-(3-hydroxy-13-methyltetradecanamido) pentanoic acid // IA vs 5 bact. strains; IA vs 1 HTCL and 1 nMCL.  
**42** // N // 5-amino-2-(3-hydroxy-14-methylpentadecanamido) pentanoic acid // IA vs 5 bact. strains; IA vs 1 HTCL and 1 nMCL.  
**15** Actinobacteria *Micromonospora* sp // \* // Micromonosporamide A with glutamine-dependent cytotoxicity from *Micromonospora* sp. MM609M-173N6: isolation, stereochemical determination, and synthesis  
**43** // N // micromonosporamide A // glutamine-dependent mod. cytotox. vs 4 HTCLs; total synth. also achieved.  
**16** Actinobacteria *Micromonospora* sp // Sagami Bay, Japan // Structure determination, biosynthetic origin, and total synthesis of akazaoxime, an enteromycin-class metabolite from a marine-derived actinomycete of the genus *Micromonospora*  
**44** // N // akazaoxime // IA vs 7 microb. strains; total synth. also achieved.  
**45** // M // A-76356 // NT.

2 Marine microorganisms and phytoplankton: 2.1 Marine-sourced bacteria

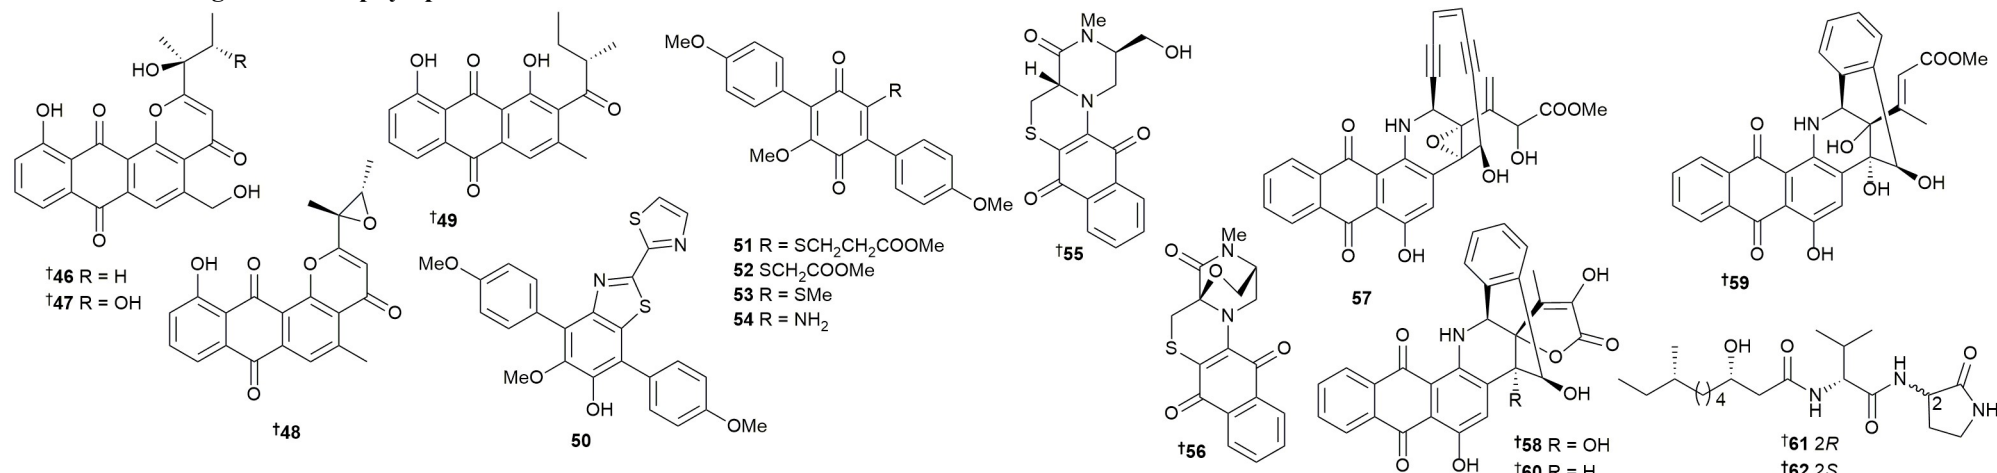

- 17** Actinobacteria *Nocardopsis aegyptia* // Antarctica // Saliniquinone derivatives, saliniquinones G–I and heraclemycin E, from the marine animal-derived *Nocardopsis aegyptia* HDN19-252  
**46** // N // saliniquinone G // weak to mod. activ. vs 6 bact. strains.  
**47** // N // saliniquinone H // mod. activ. vs 6 bact. strains.  
**48** // N // saliniquinone I // IA vs 6 bact. strains.  
**49** // N // heraclemycin E // IA vs 6 bact. strains.
- 18** Actinobacteria *Nocardopsis* sp // South China Sea // Antibacterial *p*-terphenyl with a rare 2,2'-bithiazole substructure and related compounds isolated from the marine-derived actinomycete *Nocardopsis* sp. HDN154086  
**50** // N // nocarterphenyl D // IA to mod. activ. vs 7 bact. strains; IA vs 4 HTCLs.  
**51** // N // nocarterphenyl E // IA to mod. activ. vs 7 bact. strains; IA vs 4 HTCLs.  
**52** // N // nocarterphenyl F // IA vs 4 HTCLs.  
**53** // N // nocarterphenyl G // IA vs 4 HTCLs.  
**54** // N // nocarterphenyl H // IA vs 4 HTCLs.
- 19** Actinobacteria *Nocardopsis dassonvillei* // Yongxing island, South China Sea // Dassonmycins A and B, polycyclic thioalkaloids from a marine sponge-derived *Nocardopsis dassonvillei* SCSIO 40065  
**55** // N // dassonmycin A // IA to mod. activ. vs 6 bact. strains; IA vs 4 HTCLs.  
**56** // N // dassonmycin B // IA to mod. activ. vs 6 bact. strains; IA vs 4 HTCLs.
- 20** Actinobacteria *Nonomuraea* sp // Japan Trench // Sealutomicins, new enediyne antibiotics from the deep-sea actinomycete *Nonomuraea* sp. MM565M-173N2  
**57** // N // sealutomicin A // pot. activ. vs 21 bact. strains.  
**58** // N // sealutomicin B // mod. to pot. activ. vs 21 bact. strains.  
**59** // N // sealutomicin C // mod. to pot. activ. vs 21 bact. strains.  
**60** // N // sealutomicin D // mod. to pot. activ. vs 21 bact. strains.
- 21** Firmicutes *Paenibacillus* sp // Wijdefjorden, Svalbard // Svalbamides A and B, pyrrolidinone-bearing lipopeptides from Arctic *Paenibacillus* sp.  
**61** // N // svalbamide A // quinone reductase activator; IA vs 5 HTCLs.  
**62** // N // svalbamide B // quinone reductase activator; IA vs 5 HTCLs.

**Key:** Main article bibliography reference // Taxonomy // Location // Article title  
 Compound number // Status // Compound name // Biological activity and Other information



2 Marine microorganisms and phytoplankton: 2.1 Marine-sourced bacteria

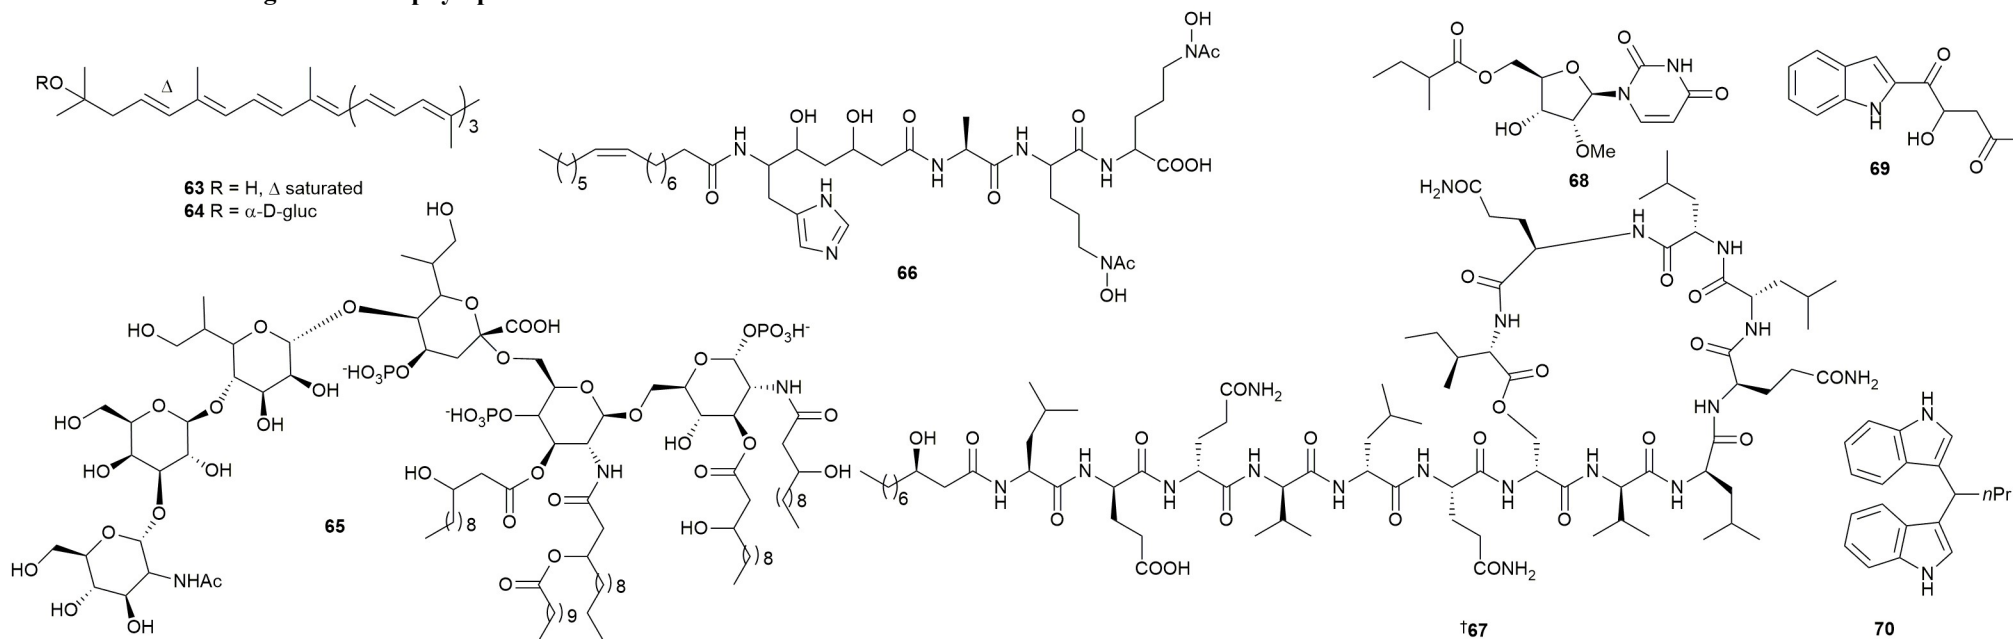

- 22 Firmicutes *Planococcus maritimus* // \* // Heterologous production of novel and rare C30-carotenoids using *Planococcus* carotenoid biosynthesis genes  
 63 // N // 5-hydroxy-5,6-dihydro-4,4'-diaponeurosporene // weak singlet oxygen quencher.  
 64 // N // 5-glucosyl-5,6-dihydro-4,4'-diapolycopene // weak singlet oxygen quencher.
- 23 Proteobacteria *Pseudoalteromonas nigrifaciens* // \* // Complete lipooligosaccharide structure from *Pseudoalteromonas nigrifaciens* Sq02-Rifr and study of its immunomodulatory activity  
 65 // N // C<sub>102</sub>H<sub>183</sub>N<sub>3</sub>O<sub>48</sub>P<sub>3</sub> // TLR-4 and NF- $\kappa$ B activator.
- 24 Proteobacteria *Pseudoalteromonas piscicida* // Okinawa, Japan // Pseudoalteropeptide A, a novel lipopeptide from the marine bacterium *Pseudoalteromonas piscicida* SWA4\_PA4 isolated from marine seaweed  
 66 // N // pseudoalteropeptide A // IA vs 1 HTCL; IA vs 2 bact. strains; weak siderophoric activ.
- 25 Pseudomonadota *Pseudomonas* sp. // \* // Structural revision of natural cyclic depsipeptide MA026 established by total synthesis and biosynthetic gene cluster analysis  
 67 // R // MA026 // tight junction opening activ.; revised by total synth.
- 26 Actinobacteria *Pseudonocardia* sp // Luhuitou fringing reef // A new uridine derivative and a new indole derivative from the coral-associated actinomycete *Pseudonocardia* sp. SCSIO 11457  
 68 // N // 11457 A // IA vs 5 HTCLs; IA vs 4 bact. strains.  
 69 // N // 11457 B // IA vs 5 HTCLs; IA vs 4 bact. strains.
- 27 Proteobacteria *Pseudovibrio denitrificans* // Green Island, Taiwan // Natural indoles from the bacterium *Pseudovibrio denitrificans* P81 isolated from a marine sponge, *Aaptos* species  
 70 // M // vibrindole A // weak cytotox. vs 1 HTCL.

## 2 Marine microorganisms and phytoplankton:

## 2.1 Marine-sourced bacteria

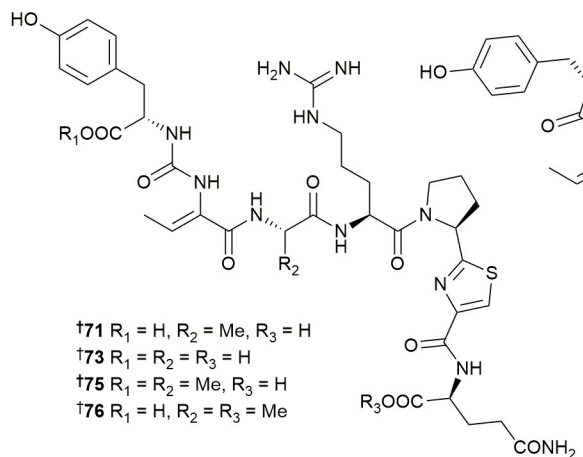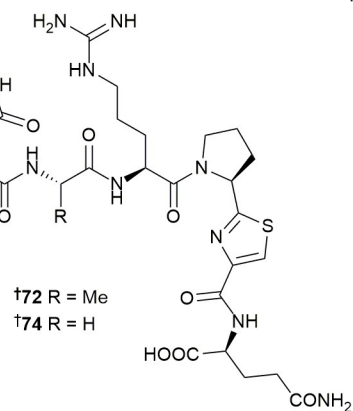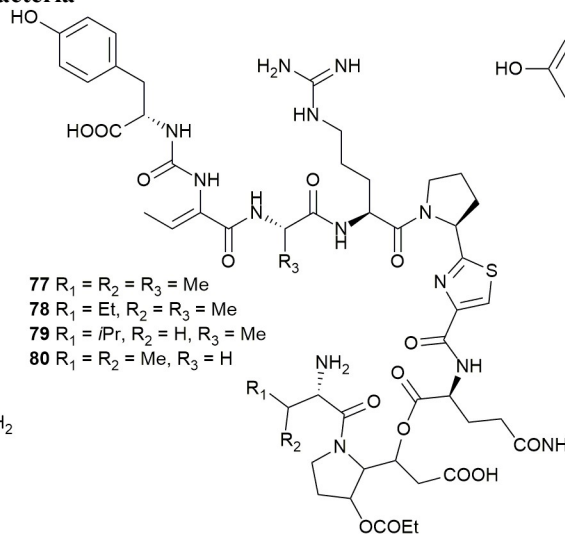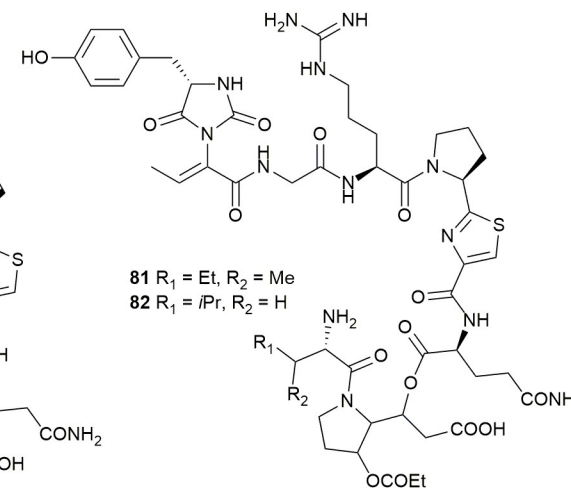

**28** Proteobacteria *Pseudovibrio brasiliensis* // João Fernandinho Beach, Búzios, Rio de Janeiro, Brazil // A family of nonribosomal peptides modulate collective behavior in *Pseudovibrio* bacteria isolated from marine sponges

71 // N // pseudovibriamide A1 // NT.

72 // N // pseudovibriamide A2 // NT.

73 // N // pseudovibriamide A3 // NT.

74 // N // pseudovibriamide A4 // NT.

75 // N // pseudovibriamide A5 // NT.

76 // N // pseudovibriamide A6 // NT.

77 // N // pseudovibriamide B1 // NT.

78 // N // pseudovibriamide B2 // NT.

79 // N // pseudovibriamide B3 // NT.

80 // N // pseudovibriamide B4 // NT.

81 // N // pseudovibriamide B5 // NT.

82 // N // pseudovibriamide B6 // NT.

## 2 Marine microorganisms and phytoplankton:

### 2.1 Marine-sourced bacteria

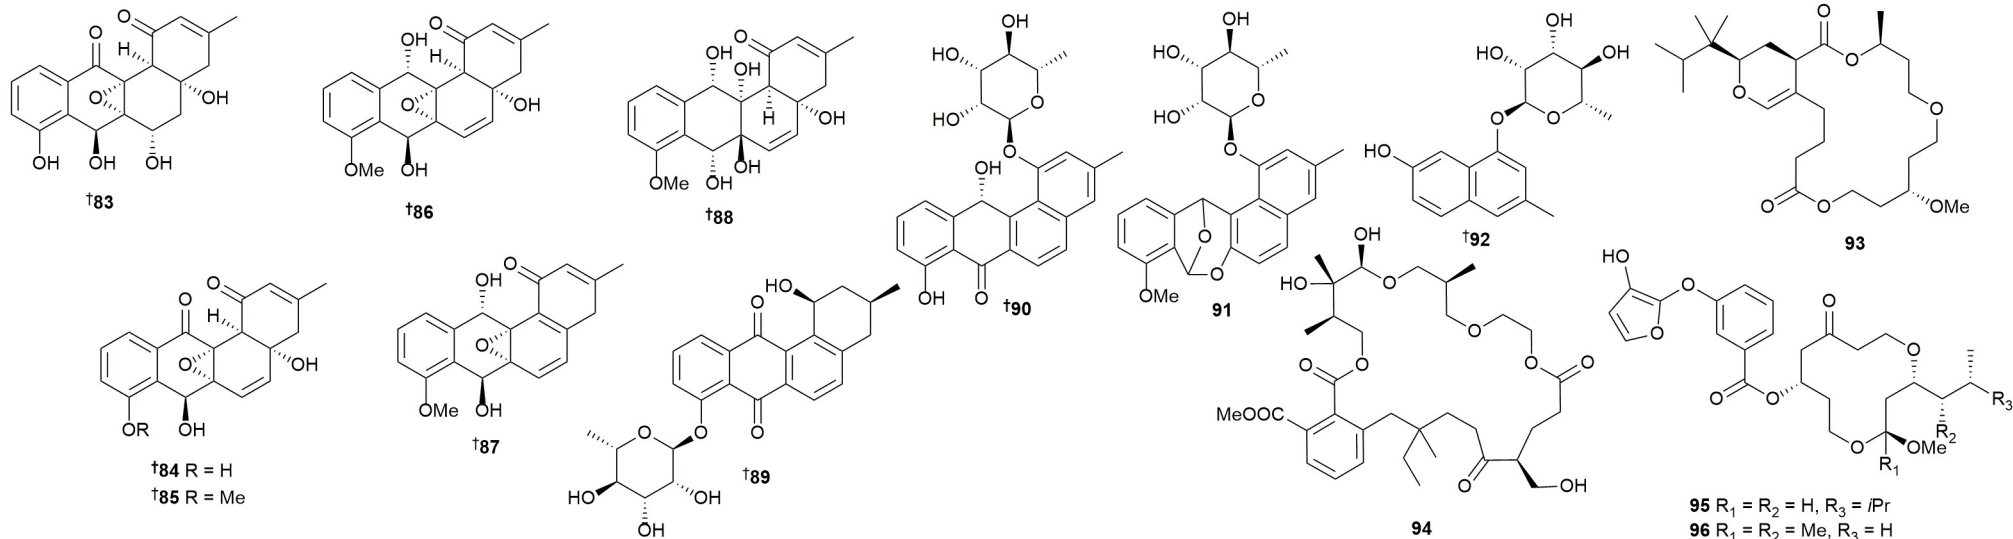

- 29** Actinobacteria *Saccharothrix* sp // Fushan Bay, Qingdao, China // Genome-guided discovery of highly oxygenated aromatic polyketides, saccharothrixins D-M, from the rare marine actinomycete *Saccharothrix* sp. D09  
**83** // N // saccharothrixin D // IA vs 7 bact. strains; IA vs anti-inflam.; IA vs 4 HTCLs.  
**84** // N // saccharothrixin E // IA vs 7 bact. strains; IA vs anti-inflam.; IA vs 4 HTCLs.  
**85** // N // saccharothrixin F // weak activ. vs 7 bact. strains; IA vs anti-inflam.; IA vs 4 HTCLs.  
**86** // N // saccharothrixin G // weak activ. vs 7 bact. strains; IA vs anti-inflam.; IA vs 4 HTCLs.  
**87** // N // saccharothrixin H // IA vs 7 bact. strains; IA vs anti-inflam.; IA vs 4 HTCLs.  
**88** // N // saccharothrixin I // IA vs 7 bact. strains; IA vs anti-inflam.; IA vs 4 HTCLs.  
**89** // N // saccharothrixin J // IA vs 7 bact. strains; IA vs anti-inflam.; IA vs 4 HTCLs.  
**90** // N // saccharothrixin K // weak activ. vs 7 bact. strains; IA vs anti-inflam.; IA vs 4 HTCLs.  
**91** // N // saccharothrixin L // IA vs 7 bact. strains; IA vs anti-inflam.; IA vs 4 HTCLs.  
**92** // N // saccharothrixin M // IA vs 7 bact. strains; IA vs anti-inflam.; IA vs 4 HTCLs.
- 30** Proteobacteria *Shewanella algae* // Gulf of Mannar, India // Chemical mining of heterotrophic *Shewanella algae* reveals anti-infective potential of macrocyclic polyketides against multidrug-resistant pathogens  
**93** // N // 20-(20a,20b-dimethylbutan-20a-yl)-9-methoxy-3-methyldodecahydroprano[3,4-*p*]-2,6,12-trioxacycloocta decine-1,13-dione // questionable structure.  
**94** // N // methyl-22-ethyl-5,6-dihydroxy-18-(hydroxymethyl)-4,5,9,22-tetramethyl-1,15,19-trioxo-octadecahydro-1*H*-benzo[*o*]-2,7,11,14-tetraoxacyclopentacosine-28-carboxylate // questionable structure.
- 31** Proteobacteria *Shewanella algae* // Gulf of Mannar, India // Macrocyclic polyketides with siderophore mode of action from marine heterotrophic *Shewanella algae*: prospective anti-infective leads attenuate drug-resistant pathogens  
**95** // N // 14-(14b,14c-dimethylbutyl)-12-methoxy-18-oxo-11,15-dioxacyclododecan-8-yl 1-((5'-hydroxyfuran-1'-yl)oxy)benzoate // questionable structure.  
**96** // N // 14-(*sec*-butyl)-12-methoxy-12-methyl-18-oxo-11,15-dioxacyclododecan-8-yl 1-((5'-hydroxyfuran-1'-yl)oxy)benzoate // questionable structure.

2 Marine microorganisms and phytoplankton:

2.1 Marine-sourced bacteria

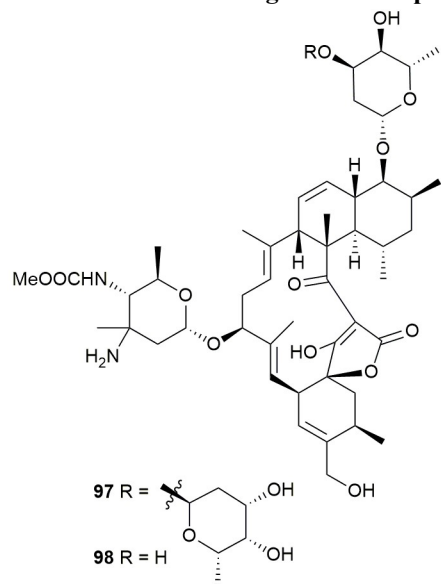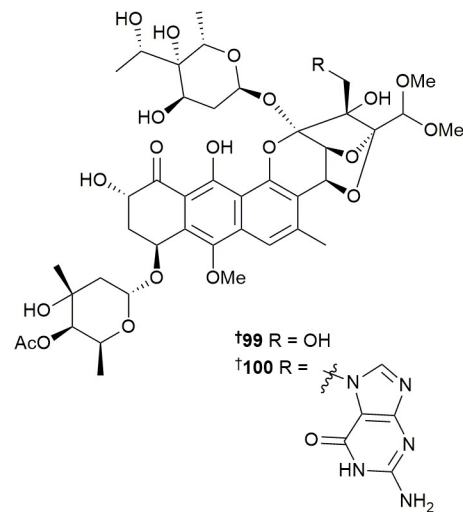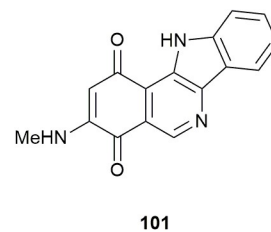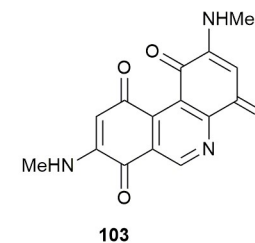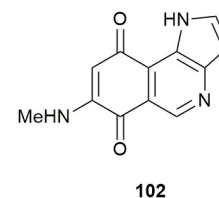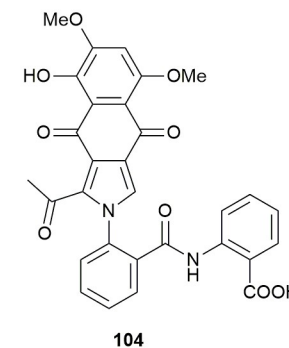

- 32 Actinobacteria *Streptomyces* sp // South China Sea // Antibacterial natural products lobophorin L and M from the marine-derived *Streptomyces* sp. 4506  
 97 // N // lobophorin L // IA to pot. activ. vs 8 bact. strains.  
 98 // N // lobophorin M // IA vs 8 bact. strains.
- 33 Actinobacteria *Streptomyces* sp // Leizhou Peninsular, China // Metabolomics tools assisting classic screening methods in discovering new antibiotics from mangrove Actinomycetia in Leizhou Peninsula  
 99 // N // gutingimycin B // NT; potential extraction and isolation artifact.  
 100 // N // trioxacarcin G // NT; potential extraction and isolation artifact.
- 34 Actinobacteria *Streptomyces* sp // \* // Mansouramycins E-G, cytotoxic isoquinolinequinones from marine *Streptomyces*  
 101 // N // mansouramycin E // IA to weak cytotox. vs 36 HTCLs.  
 102 // N // mansouramycin F // IA to weak cytotox. vs 36 HTCLs.  
 103 // N // mansouramycin G // NT.
- 35 Actinobacteria *Streptomyces* sp // South China Sea // Bhimamycin J, a rare benzo[*f*]isoindole-dione alkaloid from the marine-derived actinomycete *Streptomyces* sp. MS180069  
 104 // N // bhimamycin J // IA vs ACE2.

2 Marine microorganisms and phytoplankton: 2.1 Marine-sourced bacteria

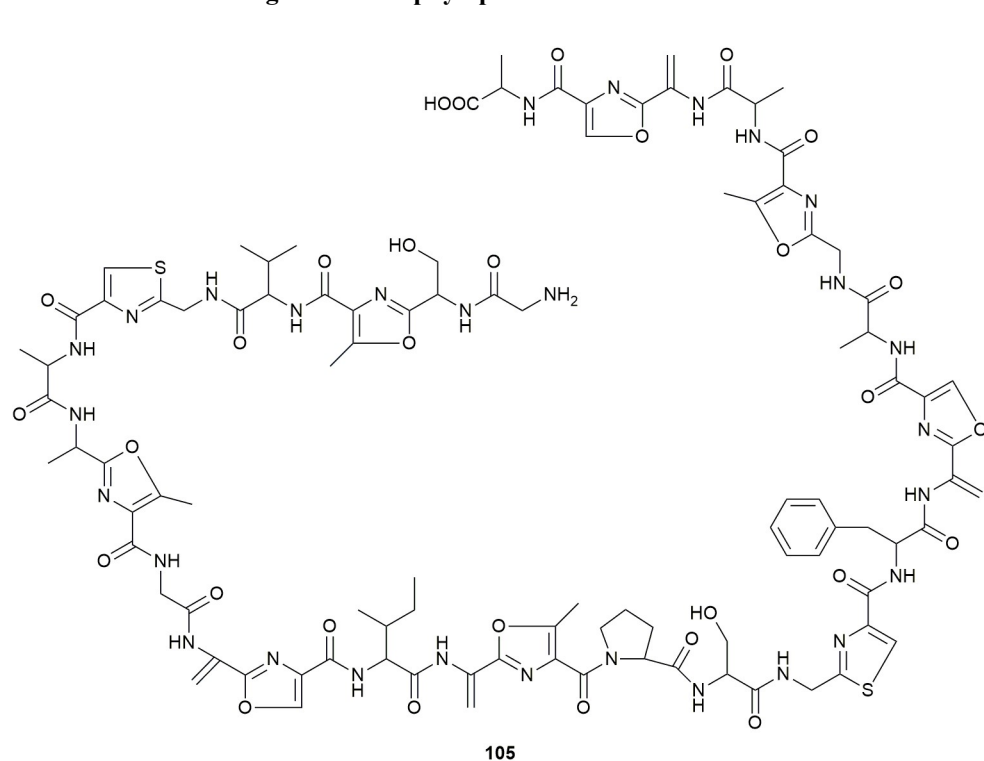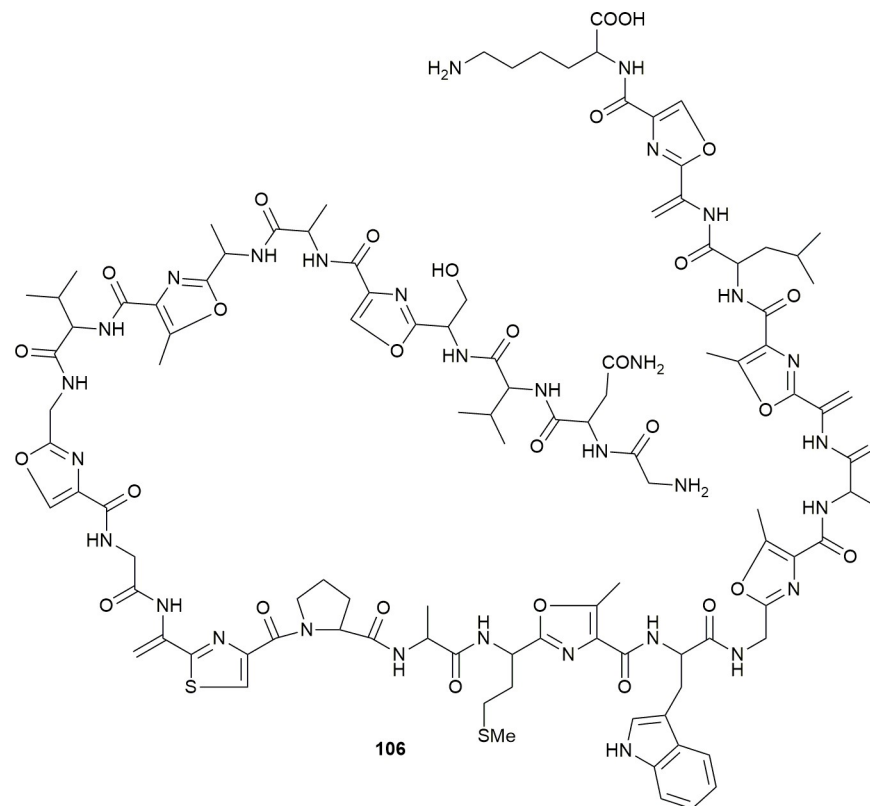

- 36** Actinobacteria *Streptomyces* sp // Ishigaki Island, Okinawa, Japan // Isolation and structure determination of new linear azole-containing peptides spongiicolazolicins A and B from *Streptomyces* sp. CWH03  
**105** // N // spongiicolazolicin A // IA vs 5 bact. strains.  
**106** // N // spongiicolazolicin B // NT.
- 37** Actinobacteria *Streptomyces* sp // Zhaoshu island, Sansha, Hainan, P.R. China // Zhaoshumycins A and B, two unprecedented antimycin-type depsipeptides produced by the marine-derived *Streptomyces* sp. ITBB-ZKa6  
**107** // N // zhaoshumycin A // IA vs 1 HTCL.  
**108** // N // zhaoshumycin B // IA vs 1 HTCL.

2 Marine microorganisms and phytoplankton: 2.1 Marine-sourced bacteria

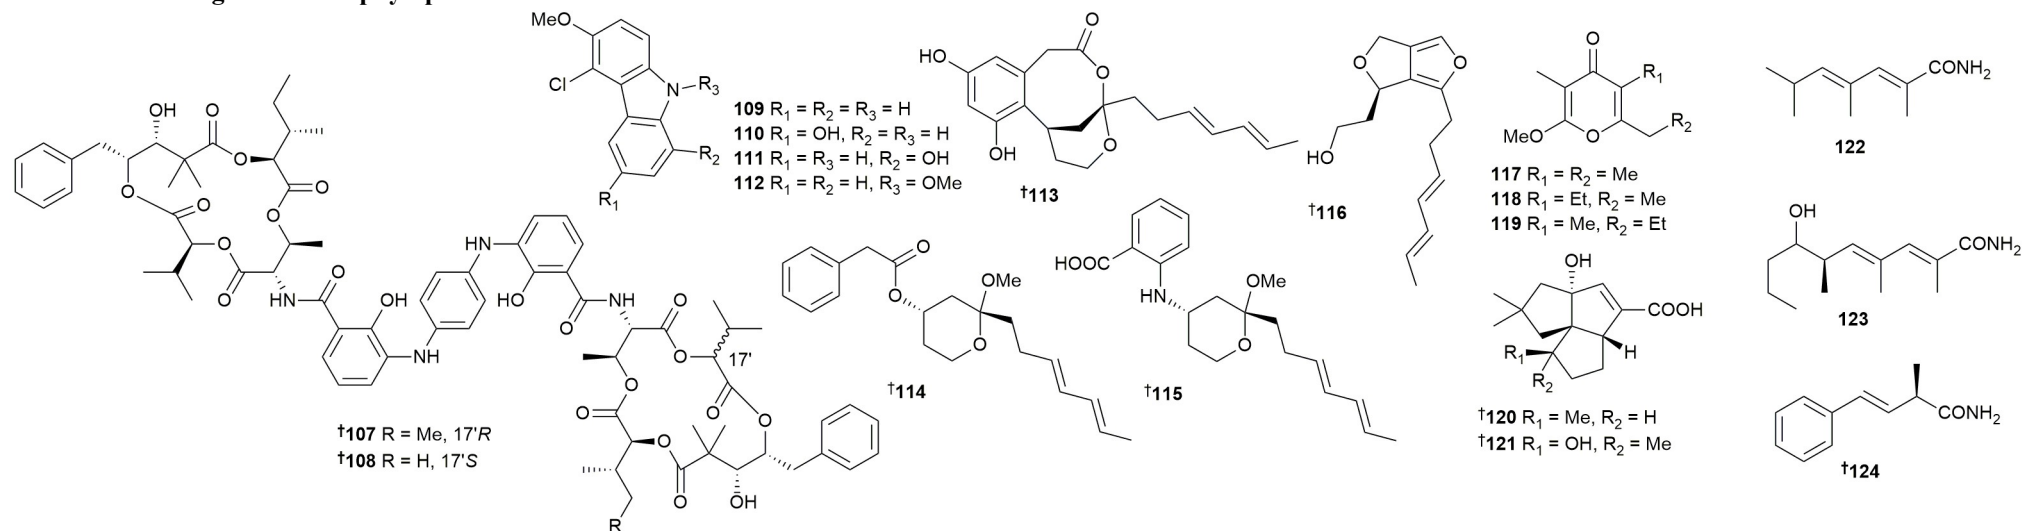

- 38 Actinobacteria *Streptomyces diacarni* // Sansha, Hainan Province, China // Antimicrobial chlorinated carbazole alkaloids from the sponge-associated actinomycete *Streptomyces diacarni* LHW51701  
 109 // N // chlocarbazomycin A // IA vs 3 bact. strains; IA vs 1 fungal strain; IA vs 1 HTCL.  
 110 // N // chlocarbazomycin B // IA vs 3 bact. strains; IA vs 1 fungal strain; IA vs 1 HTCL.  
 111 // N // chlocarbazomycin C // weak activ. vs 3 bact. strains; weak activ. vs 1 fungal strain; IA vs 1 HTCL.  
 112 // N // chlocarbazomycin D // IA vs 3 bact. strains; IA vs 1 fungal strain; IA vs 1 HTCL.
- 39 Actinobacteria *Streptomyces miharaensis* // Kosrae Island, Federated States of Micronesia // Miharadienes A–D with unique cyclic skeletons from a marine-derived *Streptomyces miharaensis*  
 113 // N // miharadiene A // IA vs anti-inflam.; IA vs 1 nMCL.  
 114 // N // miharadiene B // IA vs anti-inflam.; IA vs 1 nMCL.  
 115 // N // miharadiene C // IA vs anti-inflam.; IA vs 1 nMCL.  
 116 // N // miharadiene D // weak activ. vs anti-inflam.; IA vs 1 nMCL.
- 40 Actinobacteria *Streptomyces psammoticus* // Pearl River estuary, China // Two new  $\alpha$ -methoxy- $\gamma$ -pyrones from the mangrove sediment-derived *Streptomyces psammoticus* SCSIO NS126  
 117 // M // 2-methoxy-3,5-dimethyl-6-ethyl- $\gamma$ -pyrone // IA vs AChE.  
 118 // N // 2-methoxy-3-methyl-5,6-diethyl- $\gamma$ -pyrone // IA vs AChE.  
 119 // N // 2-methoxy-3,5-dimethyl-6-propyl- $\gamma$ -pyrone // IA vs AChE.
- 41 Actinobacteria *Streptomyces* sp // \* // Isolation and identification of pentalenolactone analogs from *Streptomyces* sp. NRRL S-4  
 120 // N // 1-deoxy-8 $\alpha$ -hydroxypentalenic acid // weak activ. vs 2 bact. strains.  
 121 // N // 1-deoxy-9 $\beta$ -hydroxy-11-oxopentalenic acid // weak activ. vs 2 bact. strains.
- 42 Actinobacteria *Streptomyces* sp // Sichang island, Chonburi Province, Thailand // Isolation of manumycin-type derivatives and genome characterization of a marine *Streptomyces* sp. C1-2  
 122 // N // (2E,4E)-2,4,6-trimethylhepta-2,4-dienamide // IA vs antioxid.; IA vs 1 HTCL; IA vs 3 fungal strains.  
 123 // N // (2E,4E,6R)-7-hydroxy-2,4,6-trimethyldeca-2,4-dienamide // IA vs antioxid.; IA vs 1 HTCL; IA vs 3 fungal strains.  
 124 // N // (R,E)-2-methyl-4-phenylbut-3-enamide // IA vs antioxid.; IA vs 1 HTCL; IA vs 3 fungal strains.

Key: Main article bibliography reference // Taxonomy // Location // Article title  
 Compound number // Status // Compound name // Biological activity and Other information

**2 Marine microorganisms and phytoplankton: 2.1 Marine-sourced bacteria**

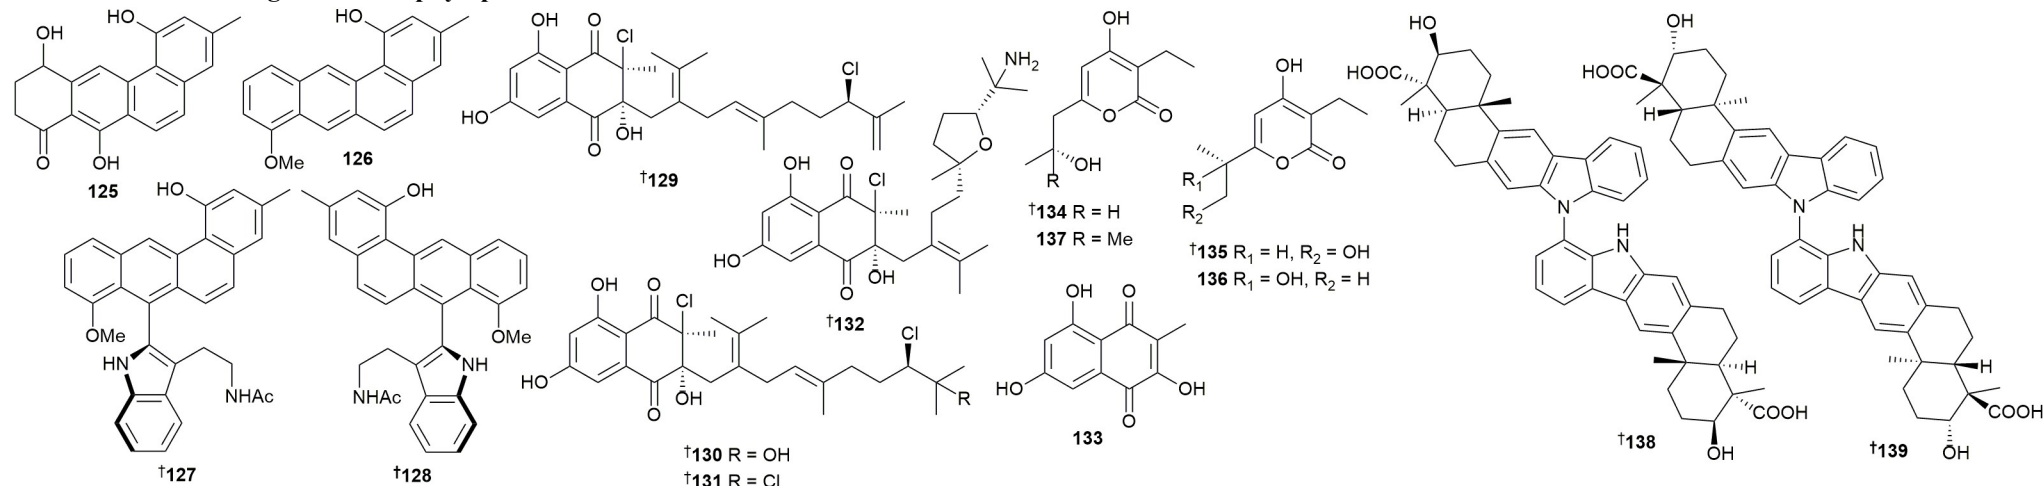

- 43** Actinobacteria *Streptomyces* sp // Kiaochow Bay, China // Ring D-modified and highly reduced angucyclinones from marine sediment-derived *Streptomyces* sp.  
**125** // N // actetropenone A // weak activ. vs 10 bact. strains.  
**126** // N // actetropenol A // weak to pot. activ. vs 10 bact. strains.  
**127** // N // (Ra)-actetropenol B // weak activ. vs 10 bact. strains.  
**128** // N // (Sa)-actetropenol B // weak activ. vs 10 bact. strains.
- 44** Actinobacteria *Streptomyces* sp // Oceanside, California, USA // Antibacterial meroterpenoids, merochlorins G-J from the marine bacterium *Streptomyces* sp.  
**129** // N // merochlorin G // IA to weak activ. vs 6 bact. strains.  
**130** // N // merochlorin H // IA vs 6 bact. strains.  
**131** // N // merochlorin I // IA to pot. activ. vs 6 bact. strains.  
**132** // N // merochlorin J // IA vs 6 bact. strains.  
**133** // N // C<sub>11</sub>H<sub>8</sub>O<sub>5</sub> // IA to mod. activ. vs 6 bact. strains.
- 45** Actinobacteria *Streptomyces* sp // Yongxing Island, South China Sea // Structure-based molecular networking for the target discovery of novel germicidin derivatives from the sponge-associated *Streptomyces* sp. 18A01  
**134** // N // germicidin P // weak inhib. hexokinase II.  
**135** // N // germicidin Q // weak inhib. hexokinase II.  
**136** // N // germicidin R // weak inhib. hexokinase II.  
**137** // N // germicidin S // weak inhib. hexokinase II.
- 46** Actinobacteria *Streptomyces olivaceus* // South China Sea // Antibiotic dixiamycins from a cold-seep-derived *Streptomyces olivaceus*  
**138** // N // dixiamycin 12a // weak to mod. activ. vs 7 bact. strains.  
**139** // N // dixiamycin 12b // weak to pot. activ. vs 7 bact. strains.

## 2 Marine microorganisms and phytoplankton:

### 2.1 Marine-sourced bacteria

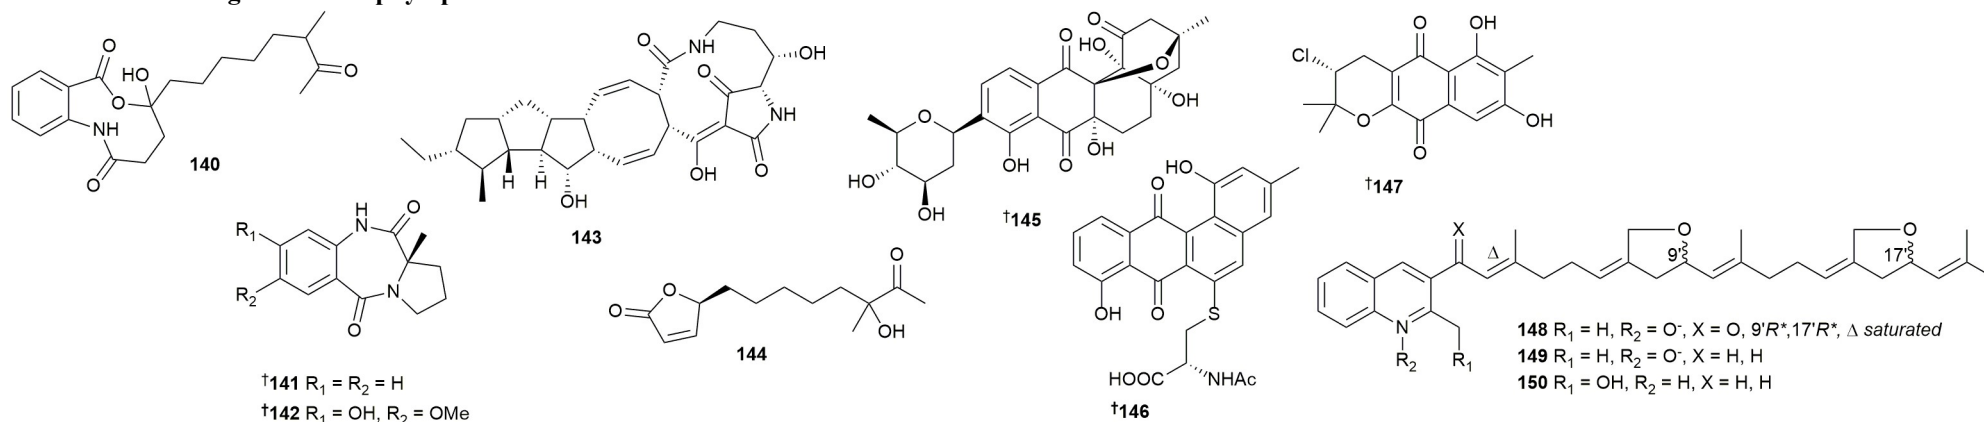

- 47 Actinobacteria *Streptomyces* sp // Antarctic coast // Antaroide, a novel natural nine-membered macrolide, inhibits melanin biosynthesis in B16F10 murine melanoma cells  
140 // N // antaroide // mod. anti-melanogenic activ.
- 48 Actinobacteria *Streptomyces* sp // Mersin, Turkey // Benzodiazepine derivatives from marine-derived *Streptomyces cacaoi* 14CM034  
141 // M // cycloanthranilylproline // weak activ. vs 4 bact. strains; weak activ. vs 1 fungal strain.  
142 // N // 7-methoxy-8-hydroxy cycloanthranilylproline // weak activ. vs 4 bact. strains; weak activ. vs 1 fungal strain.
- 49 Actinobacteria *Streptomyces koyangensis* // \* // Genome mining and metabolic profiling uncover polycyclic tetramate macrolactams from *Streptomyces koyangensis* SCSIO 5802  
143 // N // koyanamide A // NT.
- 50 Actinobacteria *Streptomyces koyangensis* // South China Sea // Octyl substituted butenolides from marine-derived *Streptomyces koyangensis*  
144 // N // (4S)-10-hydroxy-10-methyl-11-oxo-dodec-2-en-1,4-olide // IA vs 2 viral strains.
- 51 Actinobacteria *Streptomyces* sp // Hainan Island, Hainan Province, China // Gephyyamycin and cysrabelomycin, two new angucyclinone derivatives from the *Streptomyces* sp. HN-A124  
145 // N // gephyyamycin // IA vs 2 HTCLs; IA vs 3 microb. strains.  
146 // N // cysrabelomycin // IA vs 2 HTCLs; IA to weak activ. vs 3 microb. strains.
- 52 Actinobacteria *Streptomyces* sp // Mangkang mangrove forest, Semarang, Central Java, Indonesia // TMKS8A, an antibacterial and cytotoxic chlorinated  $\alpha$ -lapachone, from a sea slug-derived actinomycete of the genus *Streptomyces*  
147 // N // TMKS8A // IA to mod. activ. vs 5 microb. strains; weak cytotox. vs 1 HTCL.
- 53 Actinobacteria // La Jolla, California, USA // Marinoterpins A–C: rare linear merosesterterpenoids from marine-derived actinomycete bacteria of the family Streptomycetaceae  
148 // N // marinoterpin A // NT.  
149 // N // marinoterpin B // NT.  
150 // N // marinoterpin C // NT.



## 2 Marine microorganisms and phytoplankton:

## 2.1 Marine-sourced bacteria

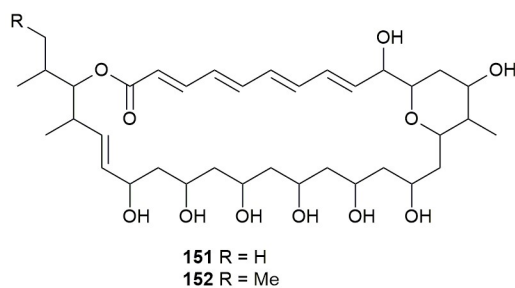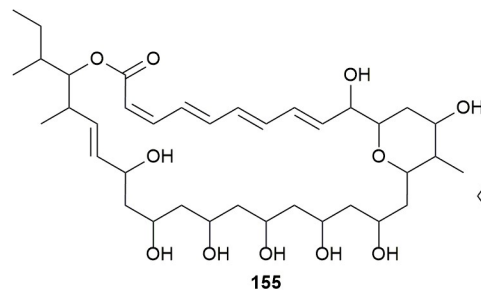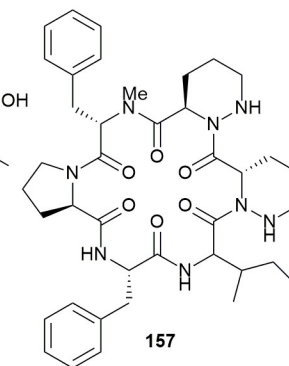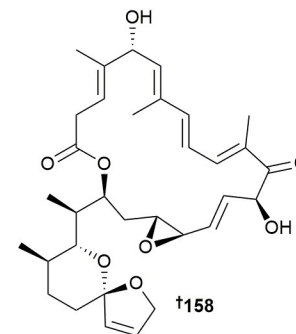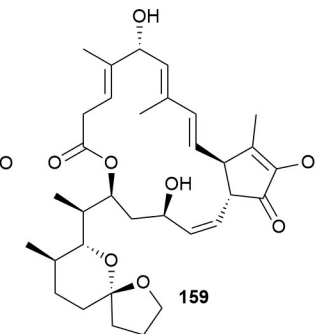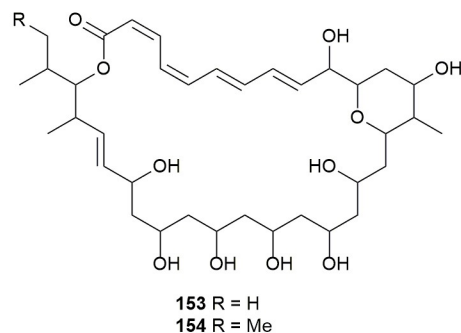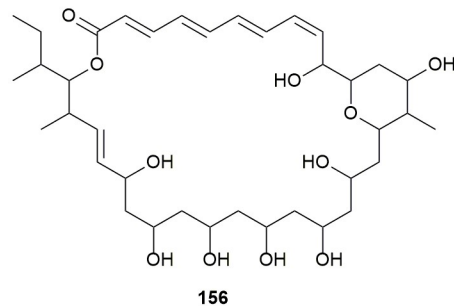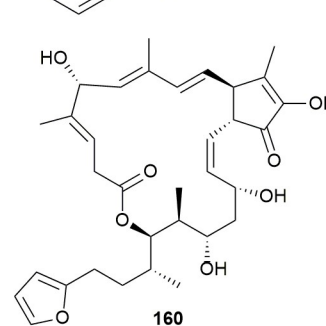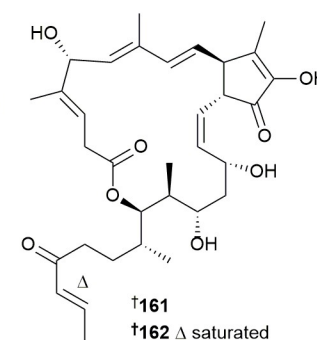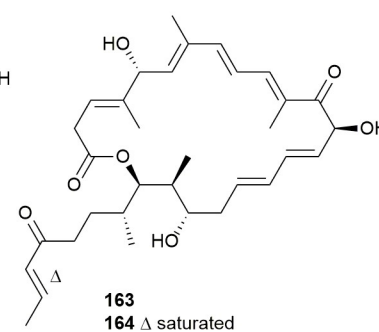

54 Actinobacteria *Streptomyces* sp // South China Sea // Antibacterial polyene-polyol macrolides and cyclic peptides from the marine-derived *Streptomyces* sp. MS110128

151 // N // pyranpolyenolide A // IA vs 5 bact. strains; IA vs 1 fungal strain.

152 // N // pyranpolyenolide B // IA vs 5 bact. strains; IA vs 1 fungal strain.

153 // N // pyranpolyenolide C // NT.

154 // N // pyranpolyenolide D // NT.

155 // N // pyranpolyenolide E // NT.

156 // N // pyranpolyenolide F // NT.

157 // N // C<sub>40</sub>H<sub>54</sub>N<sub>8</sub>O<sub>6</sub> // IA to pot. vs 5 bact. strains; IA vs 1 fungal strain.

55 Actinobacteria *Streptomyces* sp // Shuangdaowan Bay, Weihai, China // Discovery of polycyclic macrolide shuangdaolides by heterologous expression of a cryptic trans-AT pot. gene cluster

158 // N // shuangdaolide A // NT.

159 // N // shuangdaolide B // NT.

160 // N // shuangdaolide C // NT.

161 // N // shuangdaolide D // NT.

162 // M // dumulmycin // IA vs 15 microb. strains; IA vs 3 HTCLs and 2 nMCLs.

163 // N // shuangdaolide E // NT.

164 // N // shuangdaolide F // NT.

2 Marine microorganisms and phytoplankton: 2.1 Marine-sourced bacteria

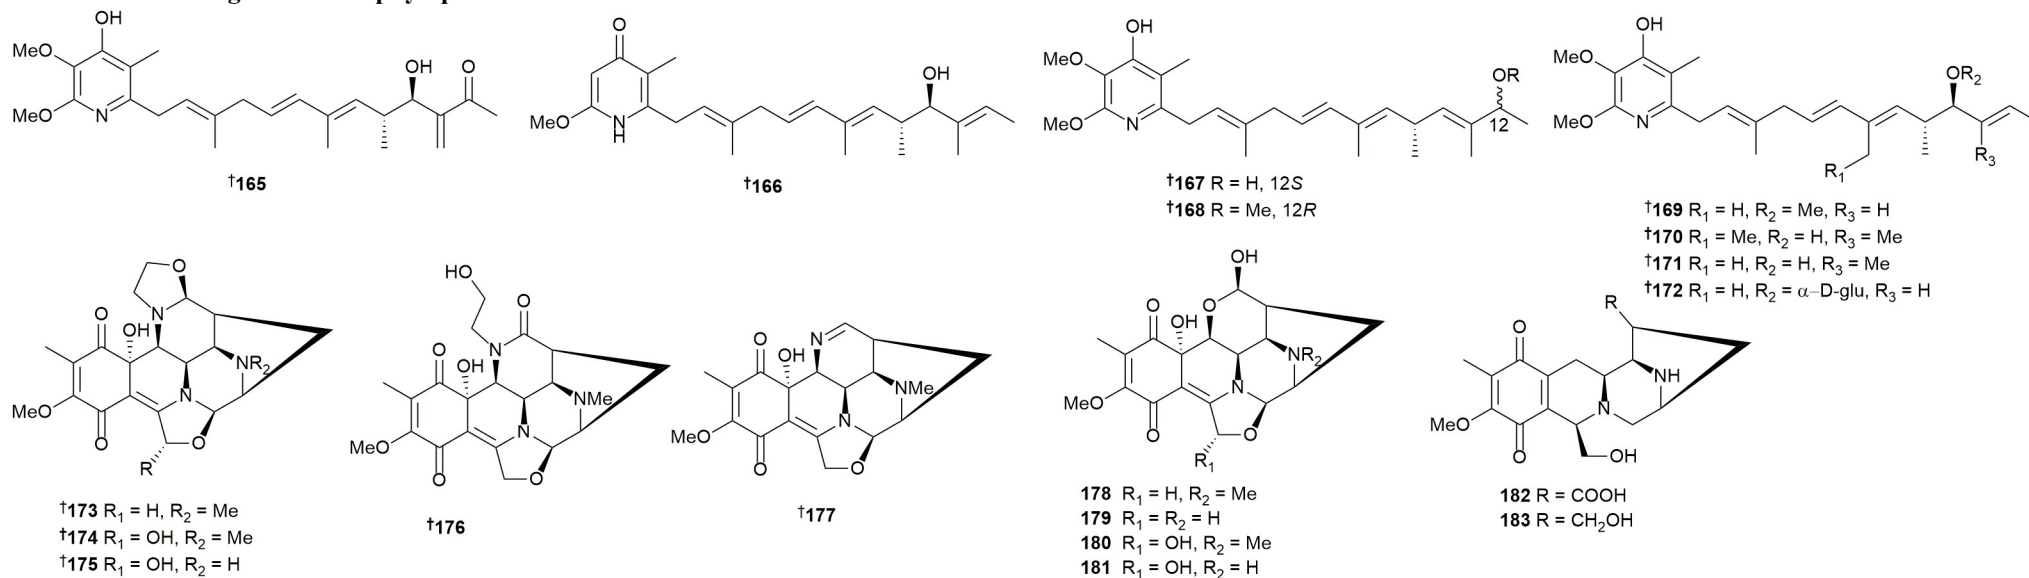

- 56 Actinobacteria *Streptomyces psammoticus* // Pearl River estuary, China // Cytotoxic minor piericidin derivatives from the actinomycete strain *Streptomyces psammoticus* SCSIO NS126
- 165 // N // piericidin L // IA to weak cytotox. vs 6 HTCLs.
- 166 // N // piericidin N // IA to pot. cytotox. vs 6 HTCLs.
- 167 // N // piericidin Q // IA to pot. cytotox. vs 6 HTCLs.
- 168 // N // piericidin O // IA to pot. cytotox. vs 6 HTCLs.
- 169 // N // piericidin P // IA to mod. cytotox. vs 6 HTCLs.
- 170 // N // piericidin M // IA to weak cytotox. vs 6 HTCLs.
- 171 // M // piericidin R // IA vs 6 HTCLs.
- 172 // N // 11-demethyl-glucopiericidin A // IA to weak cytotox. vs 6 HTCLs.
- 57 Actinobacteria *Streptomyces niveus*, Actinobacteria *Actinoalloteichus cyanogriseus* // South China Sea // Genome-directed discovery of tetrahydroisoquinolines from deep-sea derived *Streptomyces niveus* SCSIO 3406
- 173 // R // aclidinomycin A // IA to weak activ. vs 6 bact. strains.
- 174 // R // aclidinomycin B // IA vs 6 bact. strains.
- 175 // N // aclidinomycin C // IA vs 6 bact. strains.
- 176 // N // aclidinomycin D // IA to weak activ. vs 6 bact. strains.
- 177 // N // aclidinomycin E // IA to weak activ. vs 6 bact. strains.
- 178 // N // aclidinomycin F // IA vs 6 bact. strains.
- 179 // N // aclidinomycin G // IA to mod. activ. vs 6 bact. strains.
- 180 // N // aclidinomycin H // IA vs 6 bact. strains.
- 181 // N // aclidinomycin I // IA vs 6 bact. strains.
- 182 // N // aclidinomycin J // weak to mod. activ. vs 6 bact. strains.
- 183 // N // aclidinomycin K // weak activ. vs 6 bact. strains.

Key: Main article bibliography reference // Taxonomy // Location // Article title  
Compound number // Status // Compound name // Biological activity and Other information

## 2 Marine microorganisms and phytoplankton:

## 2.1 Marine-sourced bacteria

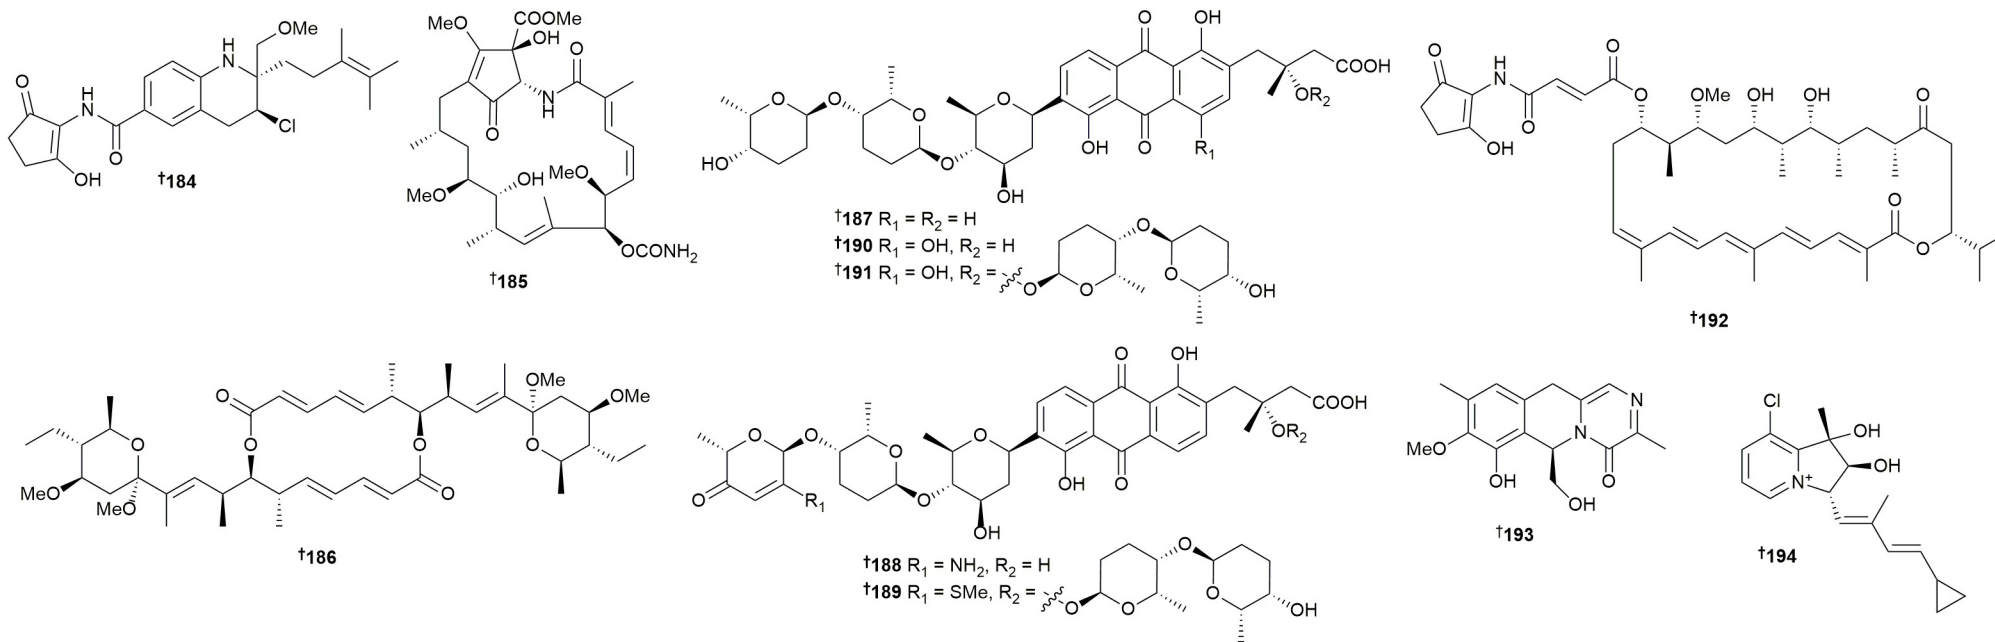

- 58** Actinobacteria *Streptomyces malaysiensis* // Wenchang, Hainan province, China // Cyclopentenone-containing tetrahydroquinoline and geldanamycin alkaloids from *Streptomyces malaysiensis* as potential anti-androgens against prostate cancer cells  
**184** // N // malaymycin // mod. to pot. cytotox. vs 5 HTCLs; mod. cytotox. vs 1 nMCL; weak inhib. of AR expression.  
**185** // N // mcrearamycin E // IA vs 5 HTCLs.  
**186** // N // 9,9'-diene-11,13,11',13'-tetra-O-methylealolide // IA to weak cytotox. vs 5 HTCLs.
- 59** Actinobacteria *Streptomyces* sp // South San Diego Bay, California, USA // Grincamycins P–T: rearranged angucyclines from the marine sediment-derived *Streptomyces* sp. CNZ-748 inhibit cell lines of the rare cancer pseudomyxoma peritonei  
**187** // N // grincamycin P // IA vs 4 HTCLs.  
**188** // N // grincamycin Q // IA vs 4 HTCLs.  
**189** // N // grincamycin R // IA to weak cytotox. vs 4 HTCLs.  
**190** // N // grincamycin S // weak cytotox. vs 4 HTCLs.  
**191** // N // grincamycin T // weak cytotox. vs 4 HTCLs.
- 60** Actinobacteria *Streptomyces* sp // Jimei, Xiamen, China // Targeted discovery of the polyene macrolide hexacosalactone A from *Streptomyces* by reporter-guided selection of fermentation media  
**192** // N // hexacosalactone A // IA to weak activ. vs 11 microb. strains; IA vs 3 HTCLs.
- 61** Actinobacteria *Streptomyces* sp // Laizhou Bay, China // Streptryazinone, a tricyclic diketopiperazine derivative with cytotoxicity from a marine-derived actinobacterium  
**193** // N // streptryazinone // IA to mod. cytotox. vs 2 HTCLs.
- 62** Actinobacteria *Streptomyces* sp // Hainan province, China // A new indolizinium alkaloid from marine-derived *Streptomyces* sp. HNA39  
**194** // N // cyclizidine J // IA vs 1 HTCL; IA vs 2 kinases.

**Key:** Main article bibliography reference // Taxonomy // Location // Article title  
 Compound number // Status // Compound name // Biological activity and Other information

2 Marine microorganisms and phytoplankton: 2.1 Marine-sourced bacteria

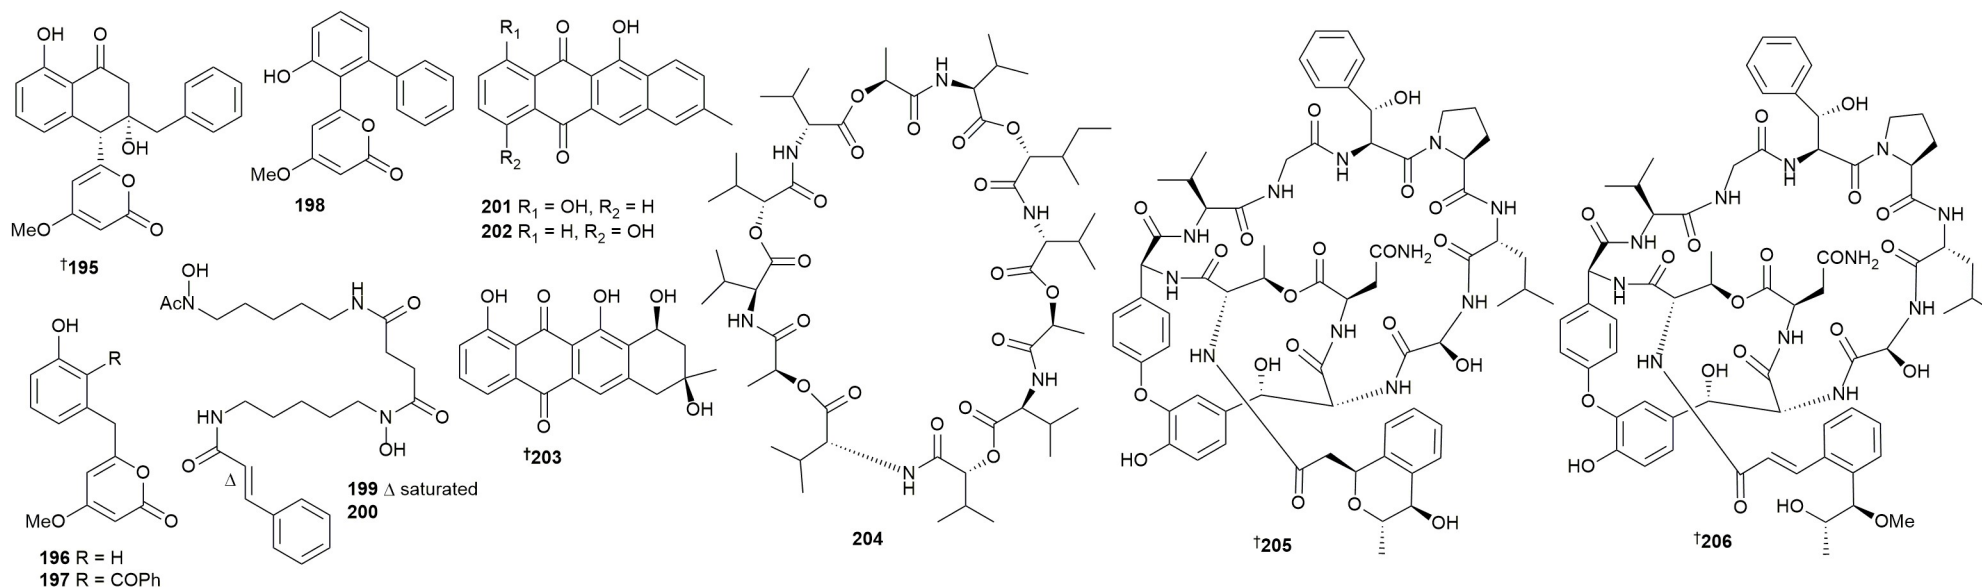

- 63** Actinobacteria *Streptomyces* sp // Zhanqiao Beach, Qingdao, China // Aromatic polyketides and hydroxamate siderophores from a marine-algae-derived *Streptomyces* species  
**195** // N // wailupemycin M // IA vs 6 microb. strains; IA vs 1 murine TCL.  
**196** // N // wailupemycin N // IA vs 6 microb. strains; IA vs 1 murine TCL.  
**197** // N // wailupemycin O // IA vs 6 microb. strains; IA vs 1 murine TCL.  
**198** // N // wailupemycin P // IA vs 6 microb. strains; IA vs 1 murine TCL.  
**199** // N // streptamide A // IA vs 6 microb. strains; IA vs 1 murine TCL; weak siderphoric activ.  
**200** // N // streptamide B // IA vs 6 microb. strains; IA vs 1 murine TCL; weak siderphoric activ.
- 64** Actinobacteria *Streptomyces* sp // Caeciliengroden marshland, Germany // Boshramycinones A-C: new anthracyclinones produced by a marine-derived *Streptomyces* sp.: isolation, structure elucidation and biological activities  
**201** // N // boshramycinone A // IA to mod. cytotox. vs 36 HTCLs; IA vs 7 microb. strains.  
**202** // N // boshramycinone B // IA to mod. cytotox. vs 36 HTCLs; IA vs 7 microb. strains.  
**203** // N // boshramycinone C // NT.
- 65** Actinobacteria *Streptomyces* sp // Lampung, Indonesia // Anti-infective and antiviral activity of valinomycin and its analogues from a sea cucumber-associated bacterium, *Streptomyces* sp. SV 21  
**204** // N // streptodepsipeptide SV21 // IA to mod. activ. vs 8 microb. strains; mod. activ. vs 1 viral strain; IA vs 1 nMCL.
- 66** Actinobacteria *Streptomyces* sp // Nyuzen Deep-sea Water Park, Toyama, Japan // Nyuzenamides A and B: bicyclic peptides with antifungal and cytotoxic activity from a marine-derived *Streptomyces* sp.  
**205** // N // nyuzenamide A // weak cytotox. vs 1 HTCL; IA to mod. activ. vs 8 microb. strains.  
**206** // N // nyuzenamide B // weak cytotox. vs 1 HTCL; IA to mod. activ. vs 8 microb. strains.

2 Marine microorganisms and phytoplankton:

2.1 Marine-sourced bacteria

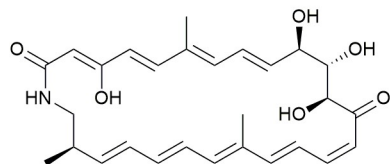

†207

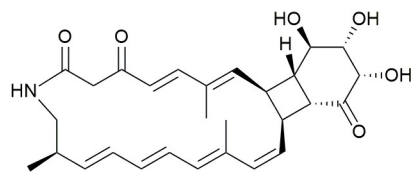

†208

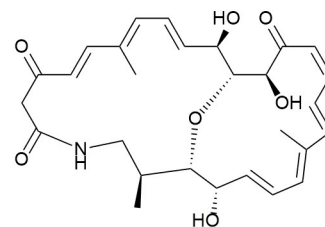

†209

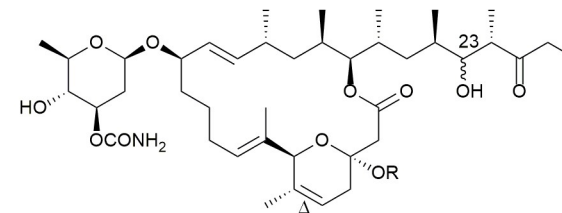

†210 R = Me, 23S

†211 R = H, Δ saturated, 23S

†212 R = H, Δ saturated, 23R

67 Actinobacteria *Streptomyces* sp // South Mid-Atlantic Ridge // Novel macrolactams from a deep-sea-derived *Streptomyces* species

207 // N // streptolactam A // IA vs 4 HTCLs; IA to weak activ. vs 6 microb. strains.

208 // N // streptolactam B // NT.

209 // N // streptolactam C // IA vs 4 HTCLs; IA to weak activ. vs 6 microb. strains.

68 Actinobacteria *Streptomyces* sp // \* // Discovery of venturicidin congeners and identification of the biosynthetic gene cluster from *Streptomyces* sp. NRRL S-4

210 // N // venturicidin D // weak cytotox. vs 1 HTCL.

211 // N // venturicidin E // mod. cytotox. vs 1 HTCL.

212 // N // venturicidin F // IA vs 1 HTCL



2 Marine microorganisms and phytoplankton: 2.2 Cyanobacteria

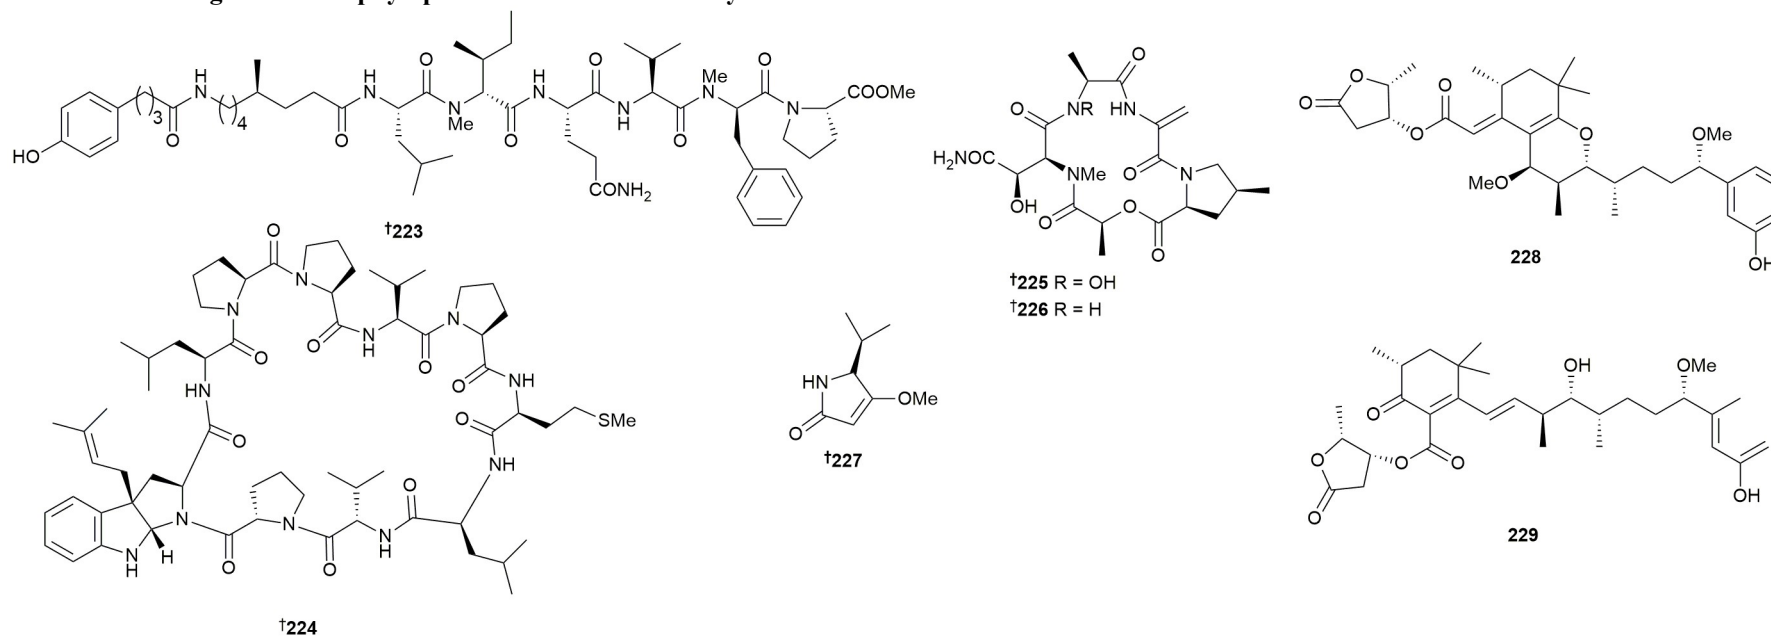

- 110** Cyanobacteria *Caldora penicillata* // Ikei Island, Okinawa, Japan // Isolation, structure determination, and total synthesis of hoshinoamide C, an antiparasitic lipopeptide from the marine cyanobacterium *Caldora penicillata*  
 223 // N // hoshinoamide C // mod. activ. vs *P. flaciparum*; weak activ. vs *T. b. rhodesiense*; IA vs 2 HTCLs.
- 111** Cyanobacteria *Leptolyngbya* sp // Bise, Okinawa Island, Okinawa Prefecture, Japan // Motobamide, an antitrypanosomal cyclic peptide from a *Leptolyngbya* sp. marine cyanobacterium  
 224 // N // motobamide // weak activ. vs *T. b. rhodesiense*; IA vs 1 nHCL and 2 HTCLs.
- 112** Cyanobacteria *Lyngbya* sp // Broward County, Florida, USA // Gatorbulin-1, a distinct cyclodepsipeptide chemotype, targets a seventh tubulin pharmacological site.  
 225 // N // gatorbulin-1 // mod. to pot. cytotox. vs NCI 60 CLs; novel tubulin binder; total synth. achieved.  
 226 // N // gatorbulin-2 // IA vs 1 HTCL.
- 113** Cyanobacteria *Dapis* sp // Noho Island, Okinawa, Japan // First total synthesis and structure–activity relationship of iheyamide A, an antitrypanosomal linear peptide isolated from a *Dapis* sp. marine cyanobacterium  
 227 // M // iheyamide A // weak activ. vs *T. b. rhodesiense*; IA vs nMCL; total syn. achieved.
- 114** Cyanobacteria *Moorea producens* // Kuba Beach, Nakagusuku, Okinawa, Japan // Debromooscillatoxins G and I from the cyanobacterium *Moorea producens*  
 228 // N // debromooscillatoxin G // IA vs 1 murine TCL; weak inhib. vs diatom assay.  
 229 // N // debromooscillatoxin I // IA vs 1 murine TCL; weak inhib. vs diatom assay.

2 Marine microorganisms and phytoplankton: 2.2 Cyanobacteria

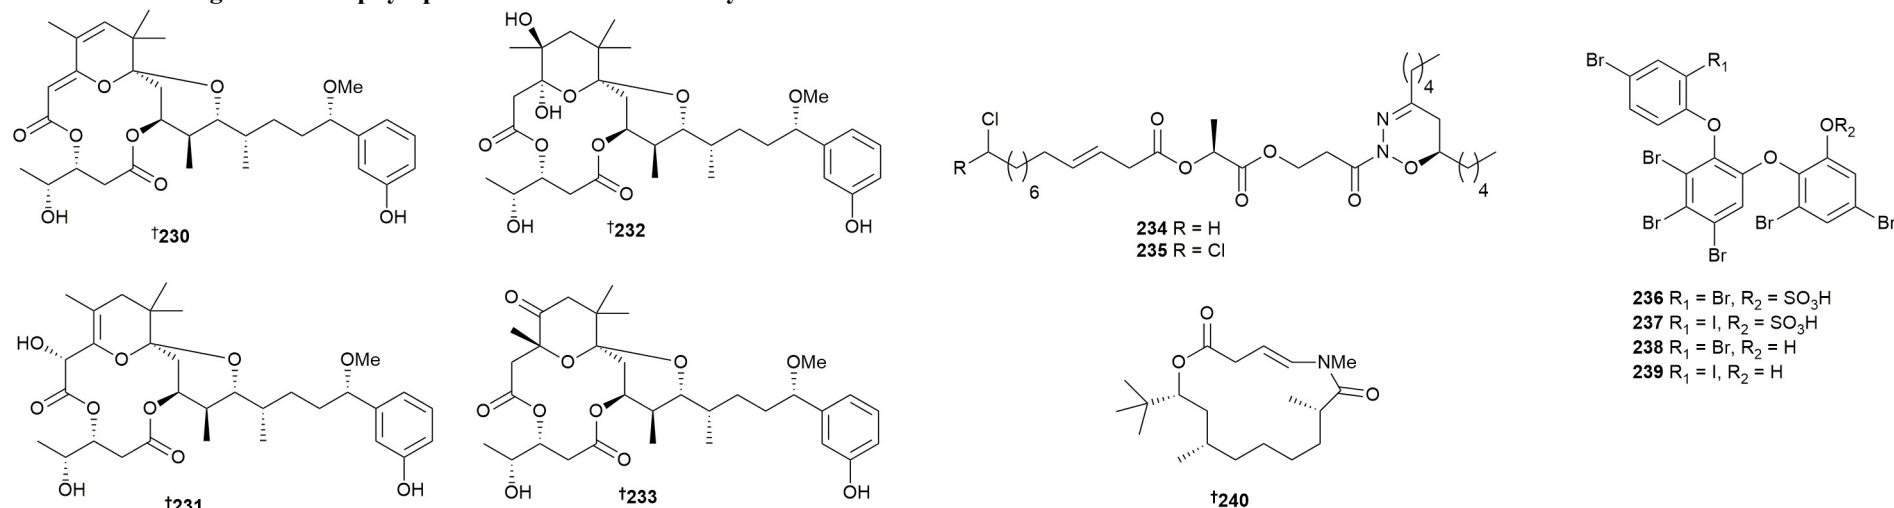

- 115 Cyanobacteria *Lyngbya* sp // Sanya, Hainan province, China // Absolute structure determination and Kv1.5 ion channel inhibition activities of new debromoaplysiatoxin analogues  
**230** // N // oscillatoxin J // weak activ. vs potassium channel Kv1.5; IA vs brine shrimp.  
**231** // N // oscillatoxin K // IA vs potassium channel Kv1.5; IA vs brine shrimp.  
**232** // N // oscillatoxin L // weak activ. vs potassium channel Kv1.5; IA vs brine shrimp.  
**233** // N // oscillatoxin M // weak activ. vs potassium channel Kv1.5; IA vs brine shrimp.
- 116 Cyanobacteria *Nodularia* sp // \* // Discovery of cyanobacterial natural products containing fatty acid residues  
**234** // N // nocuolactylate A // IA to weak cytotox. vs 1 nMCL and 3 HTCLs; IA to weak vs 5 microbial strains.  
**235** // N // nocuolactylate B // IA to weak cytotox. vs 1 nMCL and 3 HTCLs; IA vs 5 microbial strains.
- 117 Cyanobacteria *Salileptolyngbya* sp // Ie Island, Okinawa, Japan // Isolation and total synthesis of bromoiesol sulfates, antitrypanosomal arylethers from a *Salileptolyngbya* sp. marine cyanobacterium  
**236** // N // bromoiesol A sulfate // weak activ. vs *T. brucei rhodesiense*; IA vs 1 HTCL; total syn. achieved.  
**237** // N // bromoiesol B sulfate // weak activ. vs *T. brucei rhodesiense*; IA vs 1 HTCL.  
**238** // N // bromoiesol A // weak activ. vs *T. brucei rhodesiense*; IA vs 1 HTCL; total syn. achieved.  
**239** // N // bromoiesol B // mod. activ. vs *T. brucei rhodesiense*; IA vs 1 HTCL.
- 118 Cyanobacteria // \* // Total synthesis and structural reassignment of laingolide A  
**240** // R // laingolide A // NT; revised by total synth.



**2 Marine microorganisms and phytoplankton:**

**2.3 Marine-sourced fungi (excluding from mangroves)**

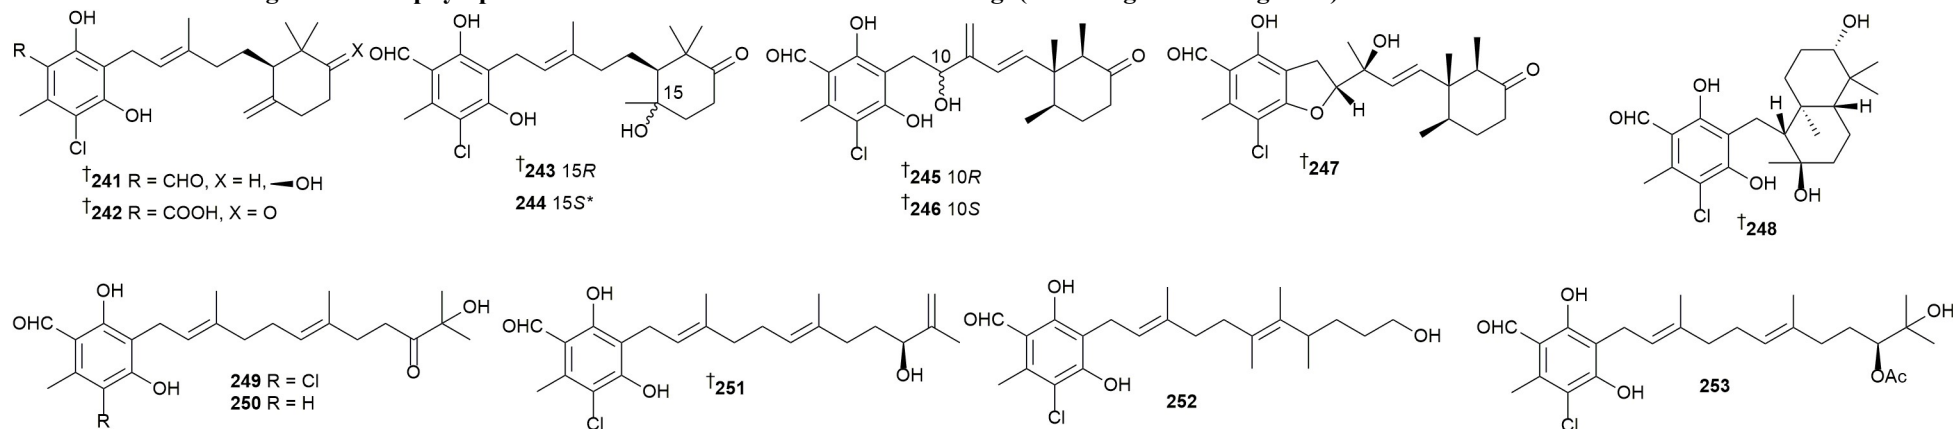

**131** Ascomycota *Acremonium sclerotigenum* // (coral, *Pocillopora damicornis*) Weizhou Islands, Guangxi Zhuang, China // Exploring marine-derived ascochlorins as novel human dihydroorotate dehydrogenase inhibitors for treatment of triple-negative breast cancer

**241** // N // acremochlorin A // pot. inhib. vs *h*DHODH; Tumour growth suppression *in vivo* (TNBC xenograft model); mod. cytotox. vs 2 HTCLs; IA vs 2 nHCLs.

**242** // N // acremochlorin B // IA vs inhib. *h*DHODH; NT *in vivo* (TNBC xenograft model); IA vs 2 HTCLs and vs 2 nHCLs.

**243** // N // acremochlorin C // IA vs inhib. *h*DHODH; NT *in vivo* (TNBC xenograft model); IA vs 2 HTCLs and vs 2 nHCLs.

**244** // N // acremochlorin D // IA vs inhib. *h*DHODH; NT *in vivo* (TNBC xenograft model); IA vs 2 HTCLs and vs 2 nHCLs.

**245** // N // acremochlorin E // weak inhib. vs *h*DHODH; NT *in vivo* (TNBC xenograft model); IA vs 2 HTCLs and vs 2 nHCLs.

**246** // N // acremochlorin F // weak inhib. vs *h*DHODH; NT *in vivo* (TNBC xenograft model); IA vs 2 HTCLs and vs 2 nHCLs.

**247** // N // acremochlorin G // IA vs inhib. *h*DHODH; NT *in vivo* (TNBC xenograft model); IA vs 2 HTCLs and vs 2 nHCLs.

**248** // N // acremochlorin H // IA vs inhib. *h*DHODH; NT *in vivo* (TNBC xenograft model); IA vs 2 HTCLs and vs 2 nHCLs.

**249** // N // acremochlorin I // weak inhib. vs *h*DHODH; NT *in vivo* (TNBC xenograft model); IA vs 2 HTCLs and vs 2 nHCLs.

**250** // N // acremochlorin J // weak inhib. vs *h*DHODH; NT *in vivo* (TNBC xenograft model); IA vs 2 HTCLs and vs 2 nHCLs.

**251** // N // acremochlorin K // mod. inhib. vs *h*DHODH; NT *in vivo* (TNBC xenograft model); weak inhib. vs 2 HTCLs; IA vs 2 nHCLs.

**252** // N // acremochlorin L // mod. inhib. vs *h*DHODH; NT *in vivo* (TNBC xenograft model); weak cytotox. vs 2 HTCLs; IA vs 2 nHCLs.

**253** // N // acremochlorin M // mod. inhib. vs *h*DHODH; Tumour growth suppression *in vivo* (TNBC xenograft model); IA to weak cytotox. vs 2 HTCLs; IA vs 2 nHCLs.

2 Marine microorganisms and phytoplankton:

2.3 Marine-sourced fungi (excluding from mangroves)

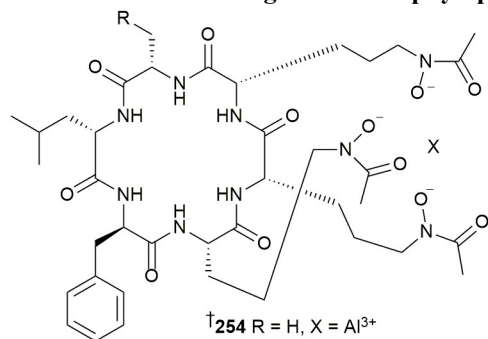

†254 R = H, X = Al<sup>3+</sup>  
 †256 R = H, X = Fe<sup>3+</sup>  
 †258 R = OH, X = Al<sup>3+</sup>  
 259 R = OH, X = Fe<sup>3+</sup>

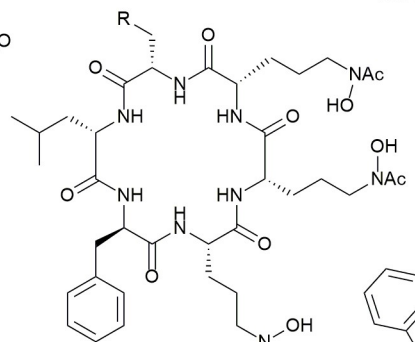

255 R = H  
 257 R = OH

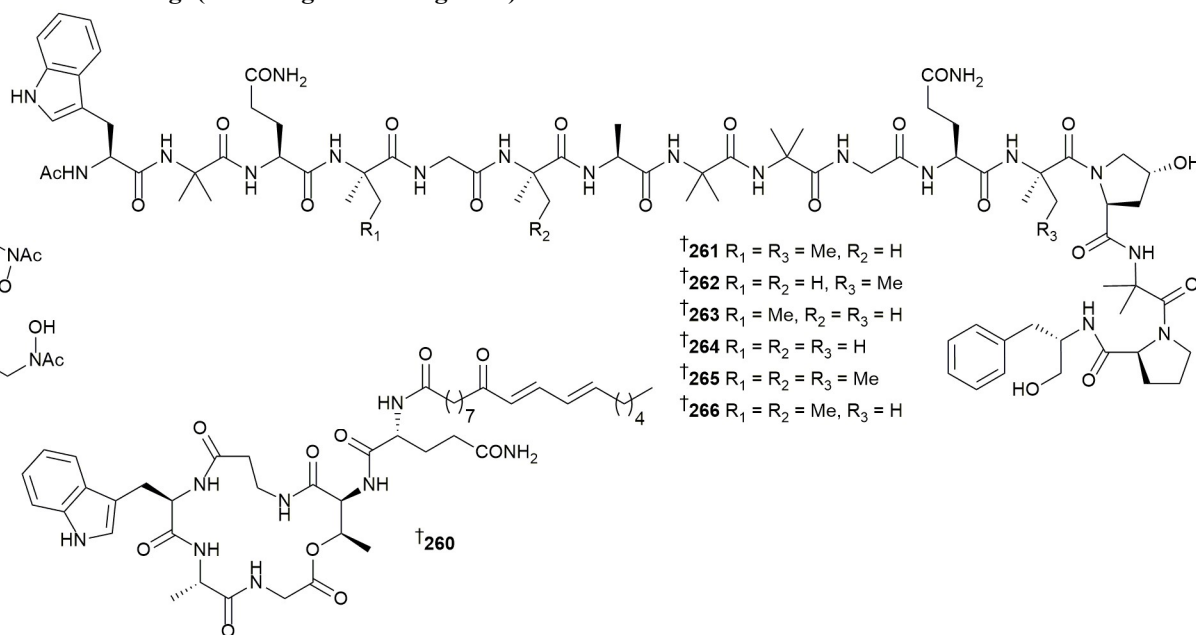

†261 R<sub>1</sub> = R<sub>3</sub> = Me, R<sub>2</sub> = H  
 †262 R<sub>1</sub> = R<sub>2</sub> = H, R<sub>3</sub> = Me  
 †263 R<sub>1</sub> = Me, R<sub>2</sub> = R<sub>3</sub> = H  
 †264 R<sub>1</sub> = R<sub>2</sub> = R<sub>3</sub> = H  
 †265 R<sub>1</sub> = R<sub>2</sub> = R<sub>3</sub> = Me  
 †266 R<sub>1</sub> = R<sub>2</sub> = Me, R<sub>3</sub> = H

132 Ascomycota *Acronium persicinum* // Yongxin Island // Cyclopeptide derivatives from the sponge-derived fungus *Acronium persicinum* F10

254 // N // Al(III)-acremoneptide E // mod. to pot. inhib. vs 2 fungi; IA vs 2 HTCLs and 1 nHCL.

255 // N // acremoneptide E // IA to weak inhib. vs 2 fungi; IA vs 2 HTCLs and 1 nHCL.

256 // N // Fe(III)-acremoneptide E // IA vs 2 fungi; IA vs 2 HTCLs and 1 nHCL.

257 // N // acremoneptide F // IA to weak inhib. vs 2 fungi; IA vs 2 HTCLs and 1 nHCL.

258 // N // Al(III)-acremoneptide F // mod. to pot. inhib. vs 2 fungi; IA vs 2 HTCLs and 1 nHCL.

259 // N // Fe(III)-acremoneptide F // IA vs 2 fungi; IA vs 2 HTCLs and 1 nHCL.

260 // N // aselacin D // NT vs 2 fungi; IA vs 2 HTCLs and 1 nHCL.

133 Ascomycota *Acronium* sp // (sponge, *Haliclona* sp.) Weizhou Island, Guangxi Province, China // Acremopectaibols A-F, 16-residue peptaibols from the sponge-derived *Acronium* sp. IMB18-086 cultivated with heat-killed *Pseudomonas aeruginosa*

261 // N // acremopectaibol A // IA to weak inhib. vs 8 microb. strains; weak inhib. vs 1 fungus; IA vs 2 HTCLs.

262 // N // acremopectaibol B // IA to weak inhib. vs 8 microb. strains; IA vs 1 fungus; IA vs 2 HTCLs.

263 // N // acremopectaibol C // IA vs 8 microb. strains; IA vs 1 fungus; IA vs 2 HTCLs.

264 // N // acremopectaibol D // IA vs 8 microb. strains; IA vs 1 fungus; IA vs 2 HTCLs.

265 // N // acremopectaibol E // IA to weak inhib. vs 8 microb. strains; weak inhib. vs 1 fungus; IA vs 2 HTCLs.

266 // N // acremopectaibol F // IA vs 8 microb. strains; IA vs 1 fungus; IA vs 2 HTCLs.

Key: Main article bibliography reference // Taxonomy // Location // Article title

Compound number // Status // Compound name // Biological activity and Other information

2 Marine microorganisms and phytoplankton:

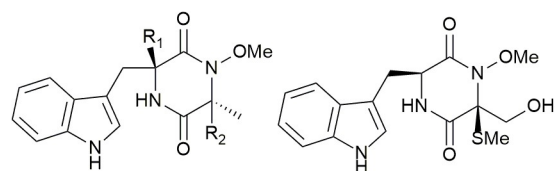

†267 R<sub>1</sub> = OMe, R<sub>2</sub> = H

†270 R<sub>1</sub> = R<sub>2</sub> = SMe

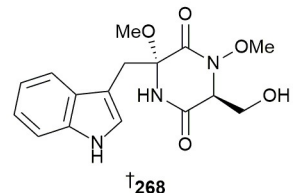

†268

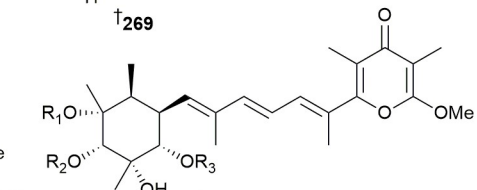

†271 R<sub>1</sub> = R<sub>3</sub> = H, R<sub>2</sub> = Ac

272 R<sub>1</sub> = H, R<sub>2</sub> = R<sub>3</sub> = Ac

273 R<sub>1</sub> = R<sub>3</sub> = Ac, R<sub>2</sub> = H

274 R<sub>1</sub> = R<sub>2</sub> = R<sub>3</sub> = Ac

2.3 Marine-sourced fungi (excluding from mangroves)

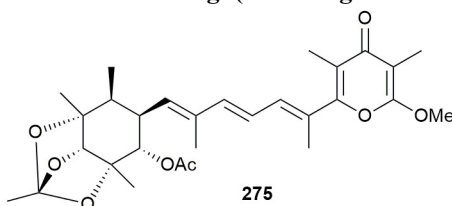

275

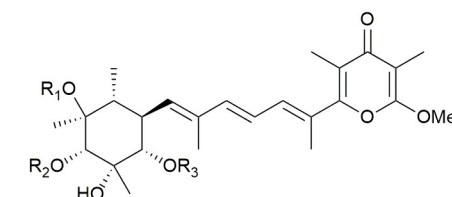

276 R<sub>1</sub> = R<sub>2</sub> = Ac, R<sub>3</sub> = H

277 R<sub>1</sub> = R<sub>2</sub> = R<sub>3</sub> = Ac

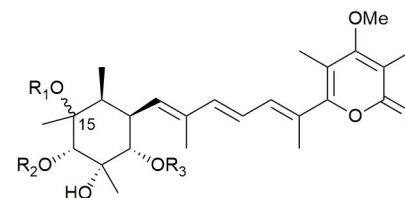

278 R<sub>1</sub> = H, R<sub>2</sub> = R<sub>3</sub> = Ac, 15 $\alpha$

279 R<sub>1</sub> = R<sub>2</sub> = R<sub>3</sub> = Ac, 15 $\beta$

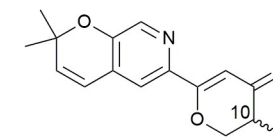

†280 10S

†281 10R

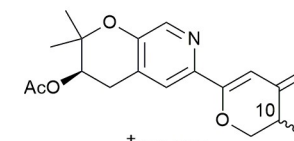

†282 10S

†283 10R

134 Ascomycota *Acrostalagmus luteoalbus* // (green alga, *Codium fragile*) Sinop, Turkey // Uncommon N-methoxyindolediketopiperazines from *Acrostalagmus luteoalbus*, a marine algal isolate of endophytic fungus

267 // N // acrozine D // IA vs 11 microb. strains; IA vs 15 fungi; IA vs AChE.

268 // N // acrozine E // IA vs 11 microb. strains; IA vs 15 fungi; IA vs AChE.

269 // N // acrozine F // IA vs 11 microb. strains; IA vs 15 fungi; weak inhib. vs AChE.

270 // N // acrozine G // IA vs 11 microb. strains; IA vs 15 fungi; IA vs AChE.

135 Ascomycota *Amauroascus* sp // (fish, *Mugil* mullet) fish market, Brisbane, Australia // Amaurones A–K: polyketides from the fish gut-derived fungus *Amauroascus* sp. CMB-F713

271 // N // amaurone A // IA vs 2 HTCLs; IA vs 2 microb. strains; IA vs 1 fungus.

272 // N // amaurone B // IA vs 2 HTCLs; IA vs 2 microb. strains; IA vs 1 fungus.

273 // N // amaurone C // IA vs 2 HTCLs; IA vs 2 microb. strains; IA vs 1 fungus.

274 // N // amaurone D // IA vs 2 HTCLs; IA vs 2 microb. strains; IA vs 1 fungus.

275 // N // amaurone E // IA vs 2 HTCLs; IA vs 2 microb. strains; IA vs 1 fungus.

276 // N // amaurone F // IA vs 2 HTCLs; IA vs 2 microb. strains; IA vs 1 fungus.

277 // N // amaurone G // IA vs 2 HTCLs; IA vs 2 microb. strains; IA vs 1 fungus.

278 // N // amaurone H // IA vs 2 HTCLs; IA vs 2 microb. strains; IA vs 1 fungus.

279 // N // amaurone I // IA vs 2 HTCLs; IA vs 2 microb. strains; IA vs 1 fungus.

136 Ascomycota *Amphichorda felina*, Ascomycota *Beauveria felina* // (ascidian, *Styela plicata*) North Atoll, Xisha Islands // Amphichoterpenoids A–C, unprecedented picoline-derived meroterpenoids from the ascidian-derived fungus *Amphichorda felina* SYSU-MS7908

280 // N // (+)-(10S)-amphichoterpenoid A // IA vs AChE; IA vs BChE.

281 // N // (–)-(10R)-amphichoterpenoid A // IA vs AChE; IA vs BChE.

282 // N // amphichoterpenoid B // IA vs AChE; IA vs BChE.

283 // N // amphichoterpenoid C // IA vs AChE; IA vs BChE.

**2 Marine microorganisms and phytoplankton: 2.3 Marine-sourced fungi (excluding from mangroves)**

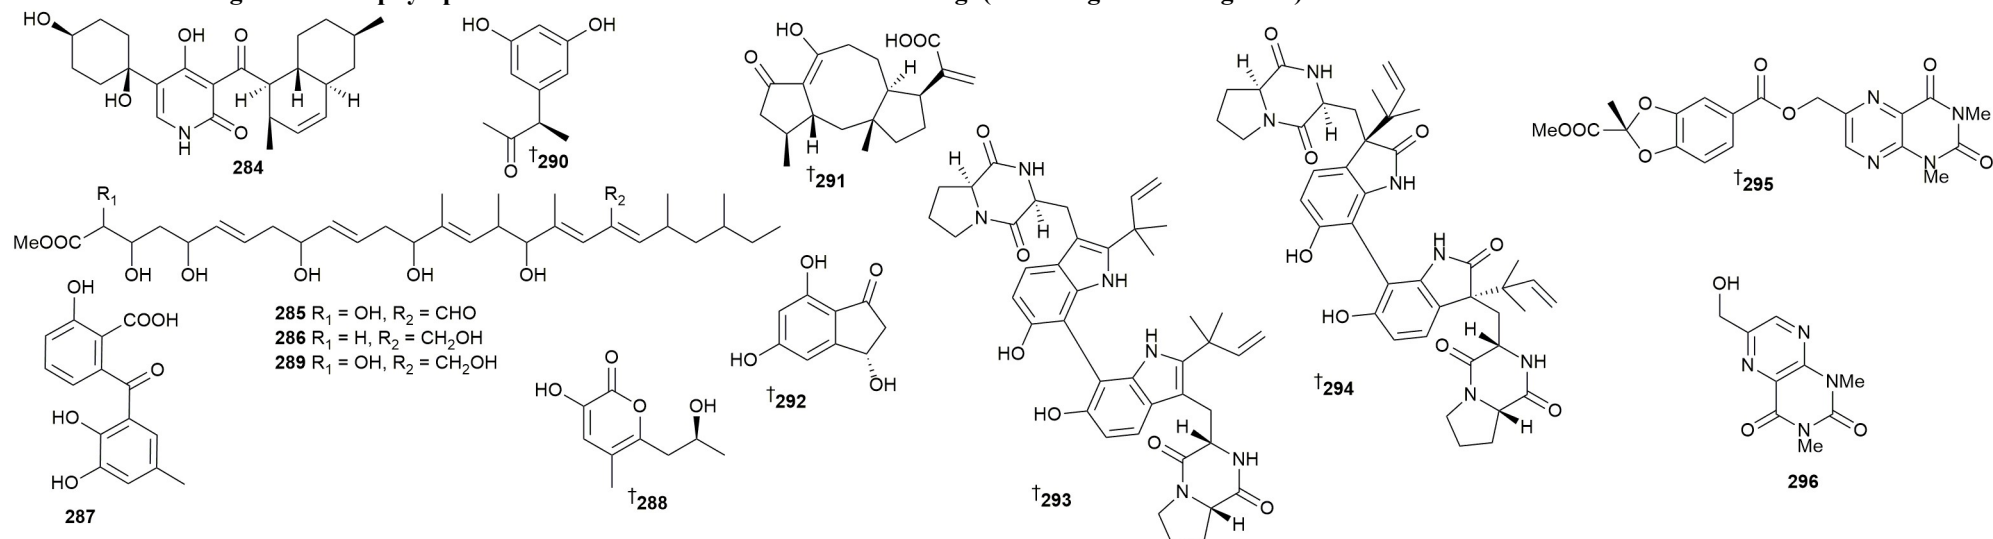

- 137** Ascomycota *Arthrinium* sp // (sediment) South China Sea // Arthpyrone L, a new pyridone alkaloid from a deep-sea *Arthrinium* sp., inhibits proliferation of MG63 osteosarcoma cells by inducing G0/G1 arrest and apoptosis  
**284** // N // arthpyrone L // IA to weak cytotox. vs 5 HTCLs.
- 138** Ascomycota *Arthrinium* sp // (unspecified clam worm) ZhaiRuoShan island, Zhoushan, Zhejiang Province of China // Five polyketides isolated from the marine-derived fungus *Arthrinium* sp.  
**285** // N // 30-oxoarthrinic methyl ester // NT.  
**286** // N // 2-deoxyarthrinic methyl ester // NT.  
**287** // N // 2-(2,3-dihydroxy-5-methyl benzoyl)-6-hydroxybenzoic acid // NT.  
**288** // N // (S)-3-hydroxy-5-methyl-6-(2-hydroxypropyl)-2H-pyran-2-one // NT.  
**289** // M // arthrinic acid methyl ester // NT.
- 139** Ascomycota // (unidentified sponge) Quang Nam sea, Vietnam // Cytotoxic and immunomodulatory phenol derivatives from a marine sponge-derived fungus *Ascomycota* sp. VK12  
**290** // N // (3R)-(3',5'-dihydroxyphenyl)butan-2-one // IA vs 3 HTCLs; IA vs NO prod.
- 140** Ascomycota *Aspergillus aculeatinus* // (seawater) South China Sea // A new fusicoccane-type norditerpene and a new indone from the marine-derived fungus *Aspergillus aculeatinus* WHUF0198  
**291** // N // aculeaterpene A // IA vs 3 HTCLs; IA vs 5 microb. strains.  
**292** // N // aculeaindone A // IA vs 3 HTCLs; IA vs 5 microb. strains.
- 141** Ascomycota *Aspergillus austroafricanus* // (seawater) Indian Ocean // New prenylated indole homodimeric and pteridine alkaloids from the marine-derived fungus *Aspergillus austroafricanus* Y32-2  
**293** // N // di-6-hydroxydeoxybrevianamide E // IA vs 1 HTCL.  
**294** // N // dinotoamide J // IA vs 1 HTCL; weak proangiogenic activ. (zebrafish).  
**295** // N // asperpteridinate A // IA vs 1 HTCL.  
**296** // M // 6-(hydroxymethyl)-1,3-dimethyl-2,4(1H,3H)-pteridinedione // IA vs 1 HTCL; weak proangiogenic activ. (zebrafish).

2 Marine microorganisms and phytoplankton: 2.3 Marine-sourced fungi (excluding from mangroves)

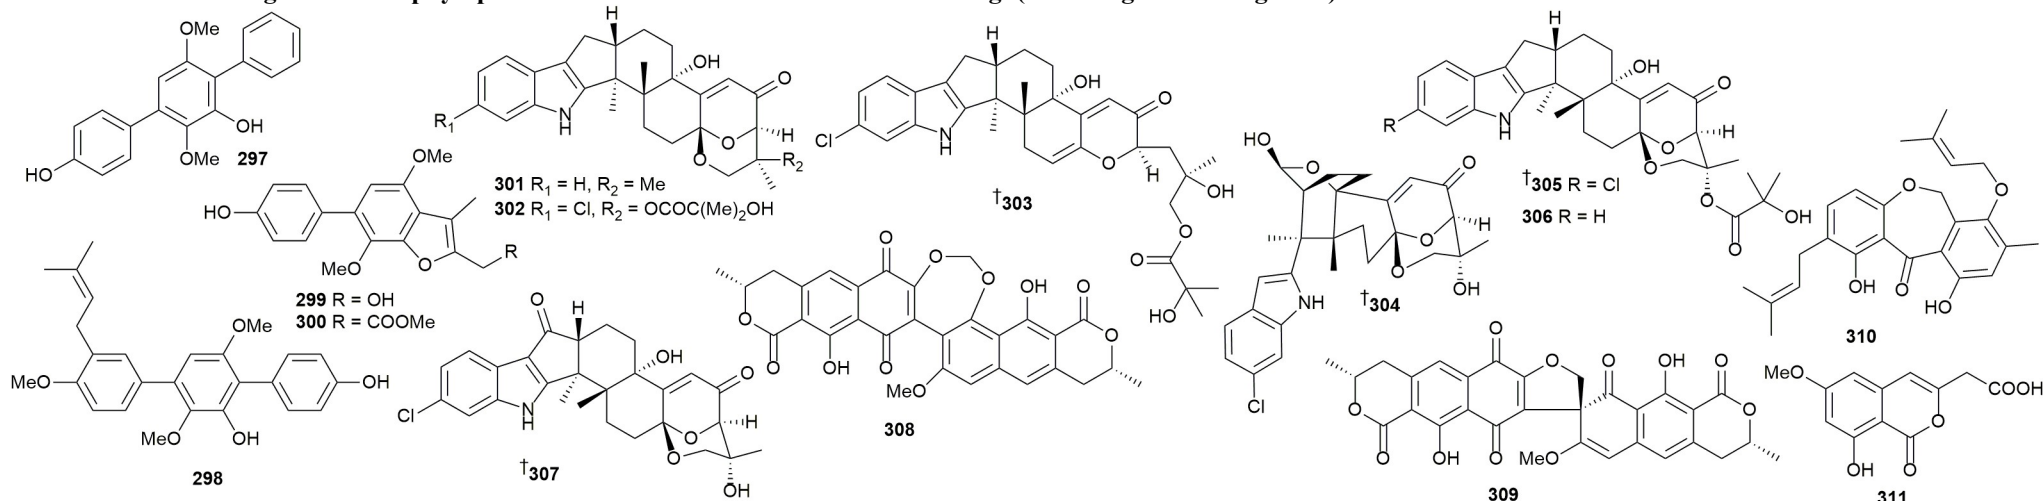

- 142** Ascomycota *Aspergillus candidus* // (seawater) Atlantic Ocean // Cytotoxic p-terphenylls from the deep-sea-derived *Aspergillus candidus*  
**297** // N // 4-deoxyterphenyllin // IA vs 5 HTCLs.
- 143** Ascomycota *Aspergillus candidus* // (gorgonian, *Junceela fragilis*) Xisha area, South China Sea // Neuronal modulators from the coral-associated fungi *Aspergillus candidus*  
**298** // N // 4''-O-methyl-prenylterphenyllin B // No neuromodulatory effect.  
**299** // N // phenylcandilide A // weak neuromodulatory effect.  
**300** // N // phenylcandilide B // weak neuromodulatory effect.  
**301** // N // asperindole E // no neuromodulatory effect.  
**302** // N // asperindole F // no neuromodulatory effect.  
**303** // N // asperindole G // weak neuromodulatory effect.
- 144** Ascomycota *Aspergillus candidus* // (unidentified sponge) Pulitzer bay, Antarctica // Ascandinines A–D, indole diterpenoids, from the sponge-derived fungus *Aspergillus candidus* HDN15-152  
**304** // N // ascandinine A // IA vs 5 HTCLs; IA vs 1 virus.  
**305** // N // ascandinine B // IA vs 5 HTCLs; IA vs 1 virus.  
**306** // N // ascandinine C // IA vs 5 HTCLs; IA vs 1 virus.  
**307** // N // ascandinine D // IA to weak cytotox. vs 5 HTCLs; IA vs 1 virus.
- 145** Ascomycota *Aspergillus elegans* // (sponge, *Monanchora unguiculata*) Kram Island, Gulf of Thailand, Chonburi Province, Thailand // 1,3-Dioxepine and spiropyran derivatives of viomellein and other dimeric naphthopyranones from cultures of *Aspergillus elegans* KUFA0015 and their antibacterial activity  
**308** // N // xanthoelegansin // IA vs 6 microb. strains.  
**309** // N // spiroxanthoelegansin // IA vs 6 microb. strains.
- 146** Ascomycota *Aspergillus falconensis* // (sediment) Dahab, Red Sea, Egypt // Polyketides from the marine-derived fungus *Aspergillus falconensis*: in silico and in vitro cytotoxicity studies  
**310** // N // arugosin O // NT.  
**311** // N // 2-(8-hydroxy-6-methoxyisochromen-3'-yl) acetic acid // NT.

2 Marine microorganisms and phytoplankton:

2.3 Marine-sourced fungi (excluding from mangroves)

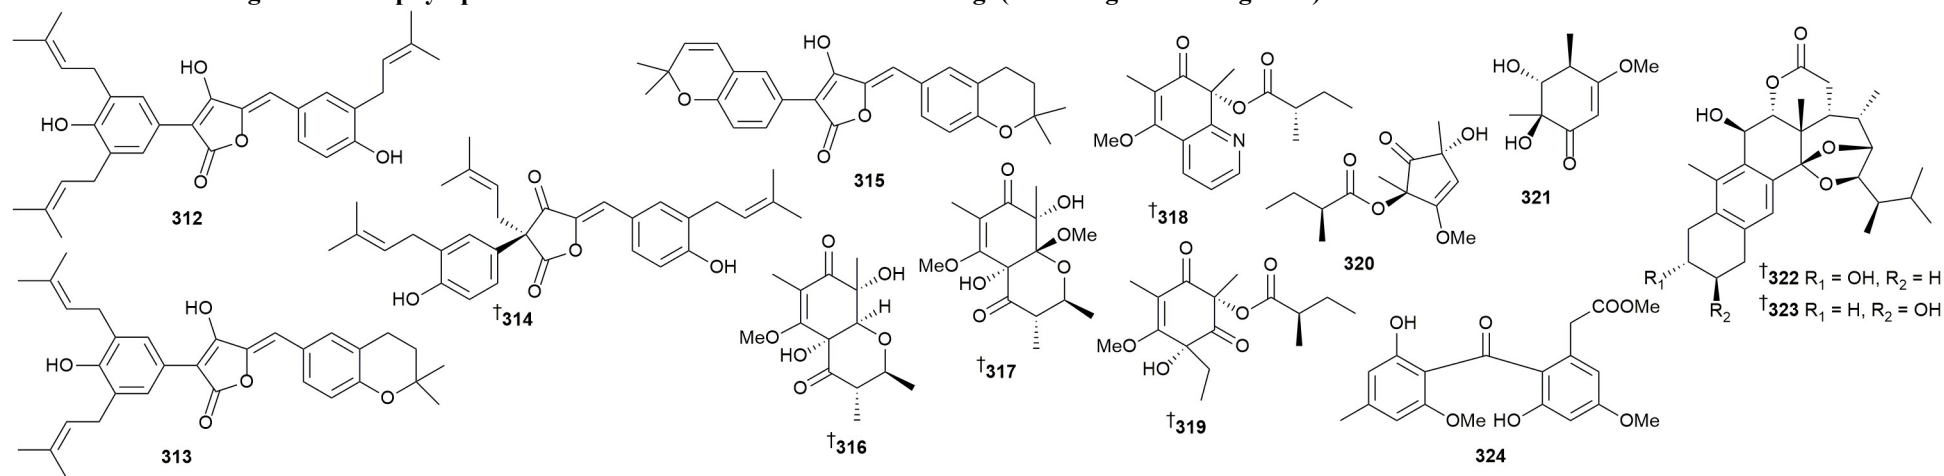

- 147** Ascomycota *Aspergillus flavipes* // (sponge, *Mycale* sp.) Samaesan Island, Chonburi province, Thailand // Prenylated phenylbutyrolactones from cultures of a marine sponge-associated fungus *Aspergillus flavipes* KUFA1152  
**312** // N // aspulvinone R // weak inhib. vs 4 microb. strains.  
**313** // N // aspulvinone S // weak to mod. inhib. vs 4 microb. strains.  
**314** // N // aspulvinone T // IA vs 4 microb. strains.  
**315** // N // aspulvinone U // IA to weak inhib. vs 4 microb. strains. (In mixture with aspulvinone A)
- 148** Ascomycota *Aspergillus flavus* // (bivalve mollusc, *Meretrix meretrix*) Hailing Island, Yangjiang, China // Phomaligols F-I, polyoxygenated cyclohexenone derivatives from marine-derived fungus *Aspergillus flavus* BB1  
**316** // N // phomaligol F // IA vs 4 HTCLs.  
**317** // N // phomaligol G // IA vs 4 HTCLs.  
**318** // N // phomaligol H // IA vs 4 HTCLs.  
**319** // N // phomaligol I // IA vs 4 HTCLs.
- 149** Ascomycota *Aspergillus flocculosus* // (brown alga, *Padina* sp.) Da Nang, Vietnam // Two new phomaligols from the marine-derived fungus *Aspergillus flocculosus* and their anti-neuroinflammatory activity in BV-2 microglial cells  
**320** // N // deketo-phomaligol A // IA vs NO prod.  
**321** // N // phomaligol E // NT.
- 150** Ascomycota *Aspergillus flocculosus* // (sponge, *Phakellia fusca*) Yongxing Island, China // Asperfloketal A and B, the first two ergostanes with rearranged A and D rings: from the sponge-associated *Aspergillus flocculosus* 16D-1  
**322** // N // asperfloketal A // weak inhib. vs antioxid. *in vivo* in zebrafish model; IA vs 3 HTCLs.  
**323** // N // asperfloketal B // weak inhib. vs antioxid. *in vivo* in zebrafish model; IA vs 3 HTCLs.
- 151** Ascomycota *Aspergillus fumigatus* // (sediment) Shenzhen, Guangdong province, China // A new benzophenone with biological activities purified from *Aspergillus fumigatus* SWZ01  
**324** // N // 2,6'-dihydroxy-2,4'-dimethoxy-8'-methyl-6-methoxy-acyl-ethyl-diphenylmethanone // IA vs antioxid. (DPPH).

## 2 Marine microorganisms and phytoplankton:

## 2.3

## Marine-sourced fungi (excluding from mangroves)

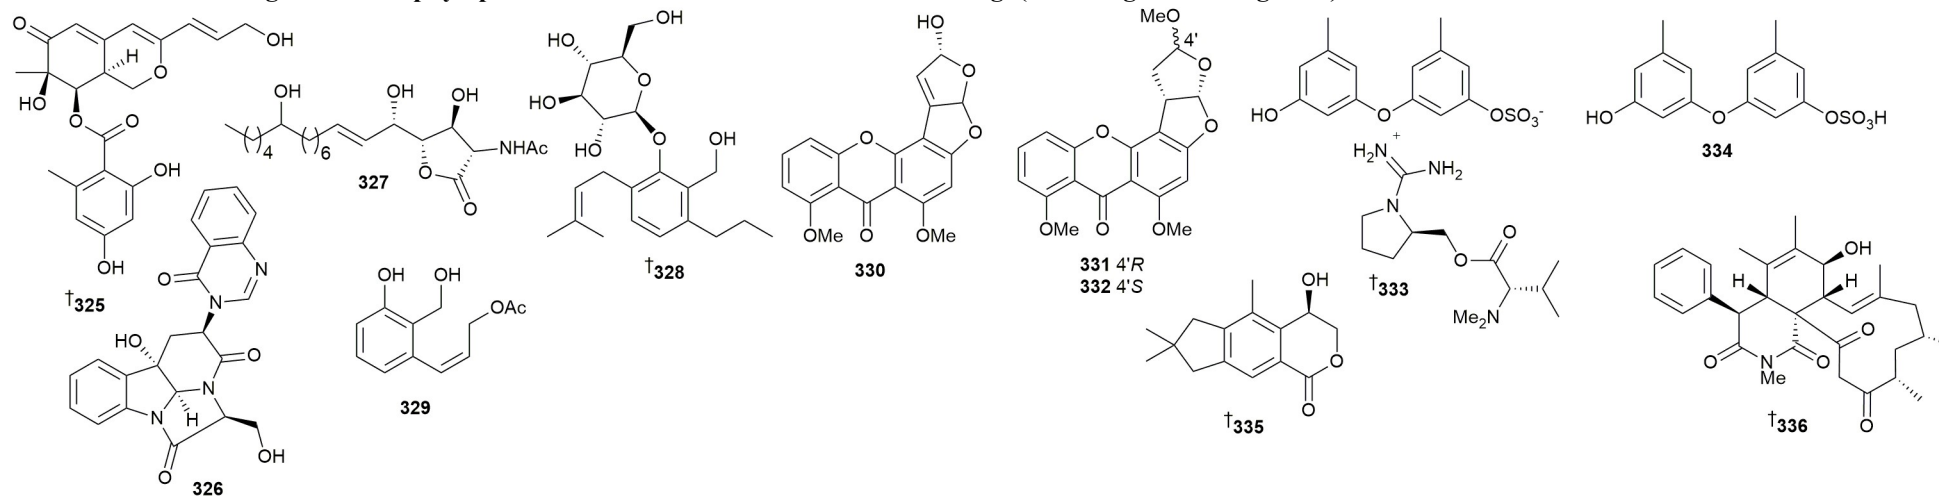

- 152** Ascomycota *Aspergillus fumigatus* // (gorgonian, *Carijoa* sp.) South China Sea // A new epimer of azaphilone derivative pinophilin B from the gorgonian-derived fungus *Aspergillus fumigatus* 14–27  
**325** // N // *epi*-pinophilin B // IA vs 4 HTCLs; IA vs 5 microb. strains.
- 153** Ascomycota *Aspergillus fumigatus* // (sponge, *Hymeniacidon perleve*) Bohai Sea, China // Antitubercular metabolites from the marine-derived fungus strain *Aspergillus fumigatus* MF029  
**326** // N // chaetominine A // IA vs 5 microb. strains.  
**327** // N // sphingofungin I // IA vs 5 microb. strains.
- 154** Ascomycota *Aspergillus insuetus* // (sediment) South China Sea // Two new phenol derivatives from the cold seep-derived fungus *Aspergillus insuetus* SD-512  
**328** // N // insphenol A // IA vs 3 microb. strains.  
**329** // N // acetylpenicphenol // weak to mod. inhib. vs 3 microb. strains.
- 155** Ascomycota *Aspergillus nomius* // (sponge, *Neopetrosia chaliniformis*) Mandeh Island, West Sumatra, Indonesia // Apoptotic activity of new oxisterigmatocystin derivatives from the marine-derived fungus *Aspergillus nomius* NC06  
**330** // N // oxisterigmatocystin J // weak cytotox. vs 1 HTCL; IA vs 3 microb. strains.  
**331** // N // oxisterigmatocystin K // IA vs 1 HTCL; IA vs 3 microb. strains.  
**332** // N // oxisterigmatocystin L // weak cytotox. vs 1 HTCL; IA vs 3 microb. strains.
- 156** Ascomycota *Aspergillus ochraceopetaliformis* // (sediment) Jeju-do, Korea // Ochraceopetalin, a mixed-biogenetic salt of polyketide and amino acid origins from a marine-derived *Aspergillus ochraceopetaliformis* fungus  
**333** // N // ochraceopetalin // IA vs 2 HTCLs; IA vs 6 microb. strains and vs 4 fungi; IA vs Srt A and vs ICL.  
**334** // N // 1-(sulfooxy)-diorcinol // weak cytotox. vs 2 HTCLs; IA vs 6 microb. strains and vs 4 fungi; IA vs Srt A and vs ICL.
- 157** Ascomycota *Aspergillus oryzae* // (sediment) Jeddah, Saudi Arabia // Antiproliferative illudalane sesquiterpenes from the marine sediment ascomycete *Aspergillus oryzae*  
**335** // N // asperorlactone // IA vs 3 HTCLs; no cytotox. vs zebrafish model.
- 158** Ascomycota *Aspergillus oryzae*, Ascomycota *Aspergillus flavus* // (sediment) Red Sea, Jeddah, Saudi Arabia // Asporychalasin, a bioactive cytochalasan with an unprecedented 6/6/11 skeleton from the Red Sea sediment *Aspergillus oryzae*  
**336** // N // asporychalasin // weak cytotox. vs 3 HTCLs; no toxicity vs zebrafish embryos.

2 Marine microorganisms and phytoplankton:

2.3 Marine-sourced fungi (excluding from mangroves)

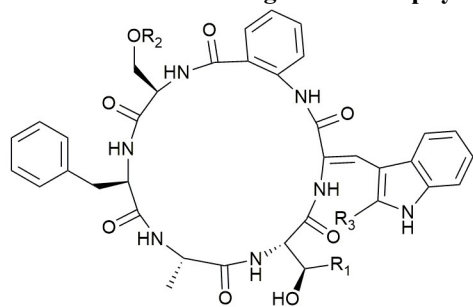

†**337** R<sub>1</sub> = Me, R<sub>2</sub> = COCH<sub>2</sub>CH<sub>2</sub>COOH, R<sub>3</sub> = H

**338** R<sub>1</sub> = R<sub>2</sub> = R<sub>3</sub> = H

†**339** R<sub>1</sub> = H, R<sub>2</sub> = Me, R<sub>3</sub> =

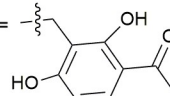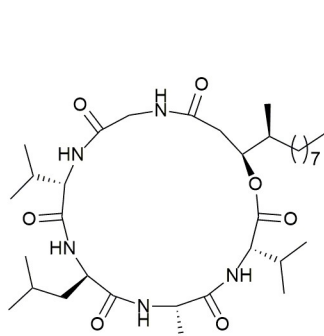

†**340**

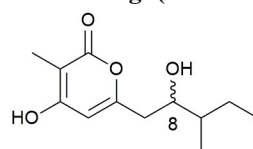

†**341** 8R

†**342** 8S

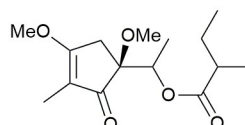

**343**

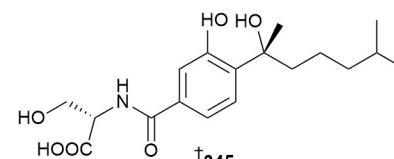

†**345**

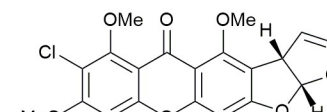

**344**

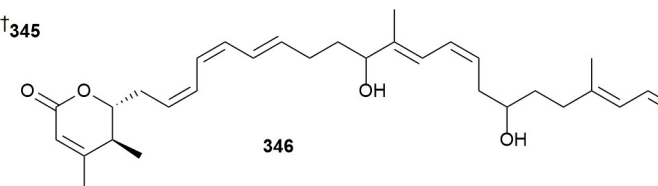

**346**

- 159** Ascomycota *Aspergillus sclerotiorum* // (unspecified/unidentified soft coral) Beihai, Guangxi Province, China // Cyclic peptides from the soft coral-derived fungus *Aspergillus sclerotiorum* SCSIO 41031  
**337** // N // sclerotide C // IA vs 9 HTCLs; IA vs 6 microb. strains and 5 fungi; IA vs AChE; IA vs NO prod.  
**338** // N // sclerotide D // IA vs 9 HTCLs; IA vs 6 microb. strains and 5 fungi; IA vs AChE; IA vs NO prod.  
**339** // N // sclerotide E // IA vs 9 HTCLs; IA vs 6 microb. strains and 5 fungi; IA vs AChE; IA vs NO prod.  
**340** // N // scopularide I // IA to weak cytotox. vs 9 HTCLs; IA vs 6 microb. strains and 5 fungi; IA vs AChE; IA vs NO prod.
- 160** Ascomycota *Aspergillus sydowii* // (gorgonian, *Verrucella umbraculum*) Sanya, Hainan Province, PR China // New pyrone and cyclopentenone derivatives from marine-derived fungus *Aspergillus sydowii* SCSIO 00305  
**341** // N // sydowione A // IA vs 3 microb. strains; IA vs antioxid. (DPPH); IA vs brine shrimp.  
**342** // N // sydowione B // IA vs 3 microb. strains; IA vs antioxid. (DPPH); IA vs brine shrimp.  
**343** // N // sydowione C // IA vs 3 microb. strains; IA vs antioxid. (DPPH); weak cytotox. vs brine shrimp.  
**344** // N // 6-methoxyl austocystin A // IA vs 3 microb. strains; IA vs antioxid. (DPPH); weak cytotox. vs brine shrimp.
- 161** Ascomycota *Aspergillus sydowii* // (sediment) Dalian, China // Inducing secondary metabolite production of *Aspergillus sydowii* through microbial co-culture with *Bacillus subtilis*  
**345** // N // serine sydonate // IA vs 3 PTPs; IA vs nematodes.  
**346** // N // macrolactin U' // IA vs 3 PTPs; IA vs nematodes.



## 2 Marine microorganisms and phytoplankton:

## 2.3 Marine-sourced fungi (excluding from mangroves)

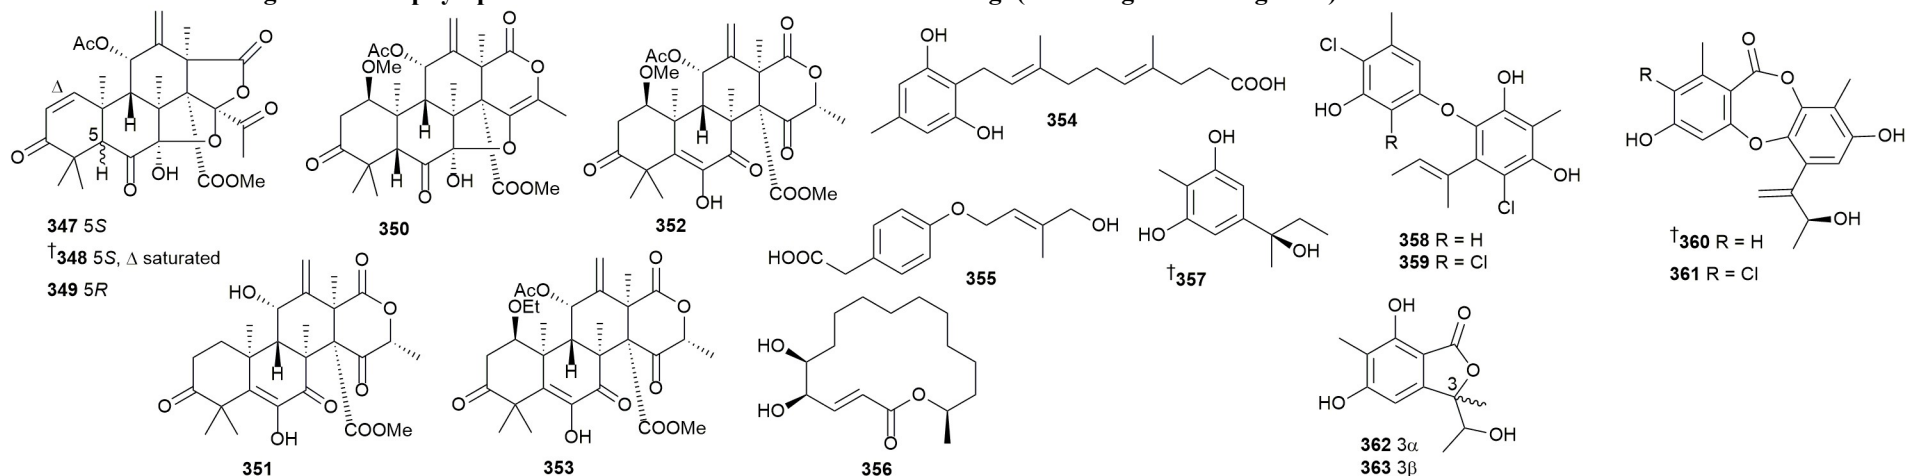

**162** Ascomycota *Aspergillus terreus* // (gastropod mollusc, *Onchidium struma*) Zhanjiang, Xuwen, China // Furanaspermeroterpenes A and B, two unusual meroterpenoids with a unique 6/6/6/5/5 pentacyclic skeleton from the marine-derived fungus *Aspergillus terreus* GZU-31-1

**347** // N // furanaspermeroterpene A // IA vs NO prod.

**348** // N // furanaspermeroterpene B // IA vs NO prod.

**349** // N // aspermeroterpene D // weak inhib. vs NO prod.

**350** // N // aspermeroterpene E // IA vs NO prod.

**351** // N // aspermeroterpene F // IA vs NO prod.

**352** // N // aspermeroterpene G // IA vs NO prod.

**353** // N // aspermeroterpene H // IA vs NO prod.

**163** Ascomycota *Aspergillus unguis*, Ascomycota *Aspergillus flocculosus* // (seawater and sponge, *Stylissa* sp.) Socheongcho Ocean Research Station, Korea // Polyketides and meroterpenes from the marine-derived fungi *Aspergillus unguis* 158SC-067 and *A. flocculosus* 01NT-1.1.5 and their cytotoxic and antioxidant activities

**354** // N // grifolin B // IA vs 6 HTCLs; IA vs antioxid. (DPPH).

**355** // N // 12-hydroxyhomovalenic acid // IA vs 6 HTCLs; IA vs antioxid. (DPPH).

**356** // M // (5*R*,6*S*,16*R*,3*E*)-5,6-dihydroxy-16-methyloxacyclohexadec-3-en-2-one // mod cytotox. vs 6 HTCLs; NT vs antioxid. (DPPH).

**164** Ascomycota *Aspergillus unguis* // (sponge, *Dysidea* sp.) Koh Bulon Mai Pai, Satun Province, Thailand // Antibacterial and antifungal polyketides from the fungus *Aspergillus unguis* PSU-MF16

**357** // N // aspergillusphenol C // NT

**358** // N // aspergillusether E // IA vs 1 nMCL; weak inhib. vs 2 microb. strains and vs 3 fungi.

**359** // N // aspergillusether F // NT

**360** // N // asperunguissidone A // IA vs 2 microb. strains and vs 3 fungi; NT vs 1 nMCL.

**361** // N // asperunguissidone B // NT

**362** // N // asperunguislide A // IA vs 2 microb. strains and vs 3 fungi; NT vs 1 nMCL.

**363** // N // asperunguislide B // IA vs 2 microb. strains and vs 3 fungi; NT vs 1 nMCL.

2 Marine microorganisms and phytoplankton: 2.3 Marine-sourced fungi (excluding from mangroves)

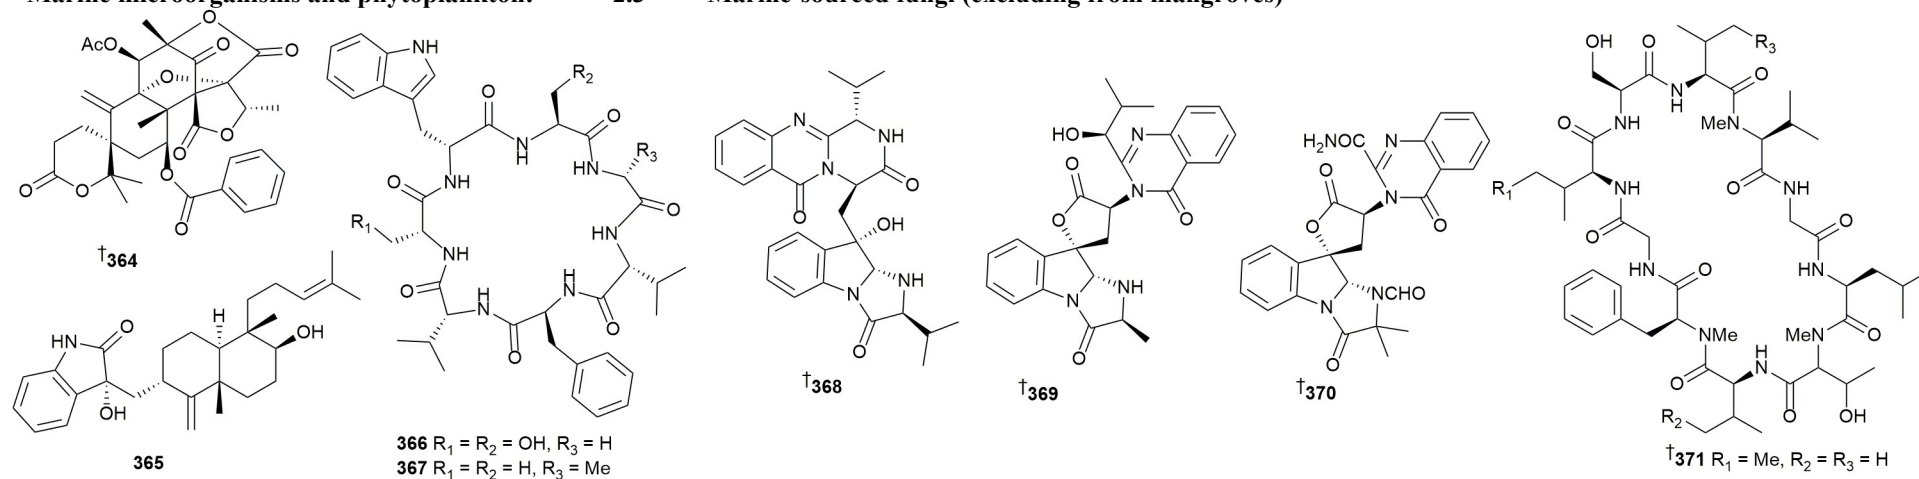

- 165** Ascomycota *Aspergillus ustus* // (ascidian, *Pyura momus*) Kermer, Turkey // Ustusaustin A: a new neuraminidase inhibitory meroterpene from the ascidian-derived endophytic fungus *Aspergillus ustus* TK-5  
**364** // N // ustusaustin A // weak inhib. vs neuraminidase.
- 166** Ascomycota *Aspergillus versicolor* // (sediment) Shengsi Island, Zhoushan, China // A new antimicrobial indoloditerpene from a marine-sourced fungus *Aspergillus versicolor* ZZ761  
**365** // N // (3*R*,9*S*,12*R*,13*S*,17*S*,18*S*)-2-carbonyl-3-hydroxylemeniveol // weak inhib. vs 1 microb. strain and vs 1 fungus.
- 167** Ascomycota *Aspergillus versicolor* // (gorgonian, *Rumphella aggregata*) Nansha Islands, South China Sea // Targeted isolation of asperheptatides from a coral-derived fungus using LC-MS/MS-based molecular networking and antitubercular activities of modified cinnamate derivatives  
**366** // N // asperheptatide A // IA vs Mtb.  
**367** // N // asperheptatide B // IA vs Mtb.
- 168** Ascomycota *Aspergillus* sp // (bivalve mollusc, *Sanguinolaria chinensis*) Haikou Bay, China // Three new quinazoline-containing indole alkaloids from the marine-derived fungus *Aspergillus* sp. HNMF114  
**368** // N // asptoryadin H // IA vs  $\alpha$ -glucosidase; IA vs activation insect ryanodine receptor.  
**369** // N // asptoryadin I // IA vs  $\alpha$ -glucosidase; IA vs activation insect ryanodine receptor.  
**370** // N // asptoryadin J // IA vs  $\alpha$ -glucosidase; IA vs activation insect ryanodine receptor.
- 169** Ascomycota *Aspergillus* sp // (sediment) South China Sea // Bioactive secondary metabolites from the deep-sea derived fungus *Aspergillus* sp. SCSIO 41029  
**371** // N // penilumamide K // IA vs 2 microb. strains; IA vs  $\alpha$ -glucosidase.  
**372** // N // (2*Z*,6*E*)-10,11,12-trihydroxy-3,7,11-trimethyldodeca-2,6-dienoic acid // IA vs 2 microb. strains; IA vs  $\alpha$ -glucosidase.

## 2 Marine microorganisms and phytoplankton:

## 2.3 Marine-sourced fungi (excluding from mangroves)

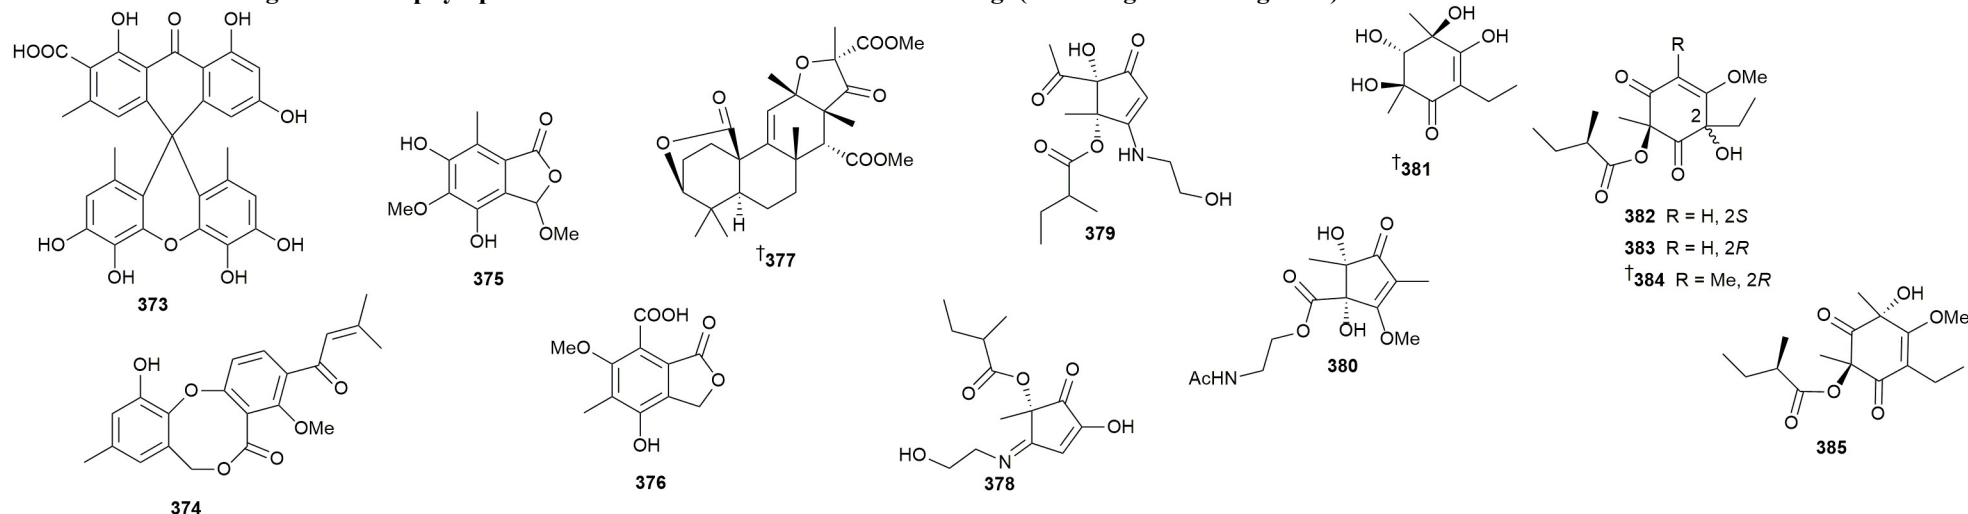

- 170** Ascomycota *Aspergillus* sp // (sediment) Qingdao, China // Antibacterial secondary metabolites from marine-derived fungus *Aspergillus* sp. IMCASMF180035  
**373** // N // aspergiloxathene A // IA vs 6 microb. strains.  
**374** // N //  $\Delta^2$ -1'-dehydropenicillide // IA vs 6 microb. strains.  
**375** // N // 5-methyl-3-methoxyepicoccone // IA vs 6 microb. strains.  
**376** // N // 7-carboxy-4-hydroxy-6-methoxy-5-methylphthalide // IA vs 6 microb. strains.
- 171** Ascomycota *Aspergillus* sp // (sediment) Zhoushan Island, East China Sea // A new antibacterial 3,5-dimethylorsellinic acid-based meroterpene from the marine fungus *Aspergillus* sp. CSYZ-1  
**377** // N // aspergillactone // weak to pot. inhib. vs 8 microb. strains; IA vs 9 microb. strains.
- 172** Ascomycota *Aspergillus* sp // (gorgonian, *Melitodes squamata*) Sanya, Hainan Province, China // Eight new cyclopentenone and cyclohexenone derivatives from the marine-derived fungus *Aspergillus* sp. SCSIO 41501 by OSMAC strategy  
**378** // N // aspergisponone A // IA vs 4 microb. strains; IA vs AChE; IA vs brine shrimp.  
**379** // N // aspergisponone B // IA vs 4 microb. strains; IA vs AChE; IA vs brine shrimp.  
**380** // N // aspergisponone C // IA vs 4 microb. strains; IA vs AChE; IA vs brine shrimp.  
**381** // N // aspergisponone D // IA vs 4 microb. strains; IA vs AChE; IA vs brine shrimp.  
**382** // N // aspergisponone E // IA vs 4 microb. strains; IA vs AChE; IA vs brine shrimp.  
**383** // N // aspergisponone F // IA vs 4 microb. strains; IA vs AChE; IA vs brine shrimp.  
**384** // N // aspergisponone G // IA vs 4 microb. strains; IA vs AChE; IA vs brine shrimp.  
**385** // N // aspergisponone H // IA vs 4 microb. strains; IA vs AChE; IA vs brine shrimp.

## 2 Marine microorganisms and phytoplankton:

## 2.3 Marine-sourced fungi (excluding from mangroves)

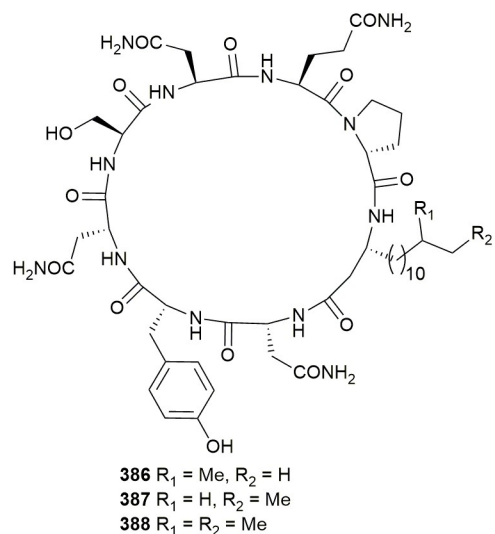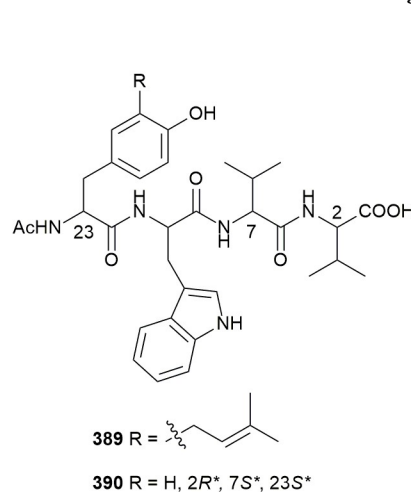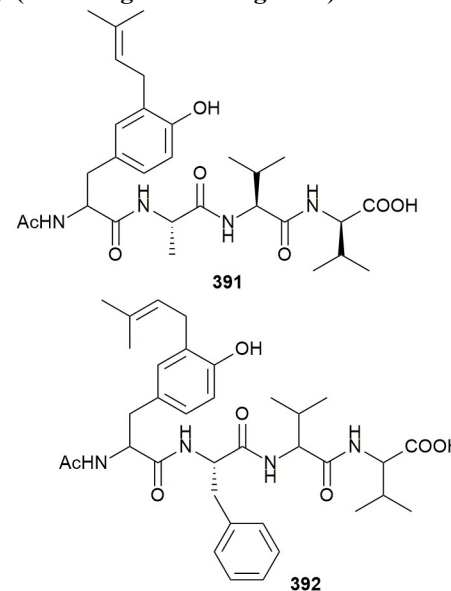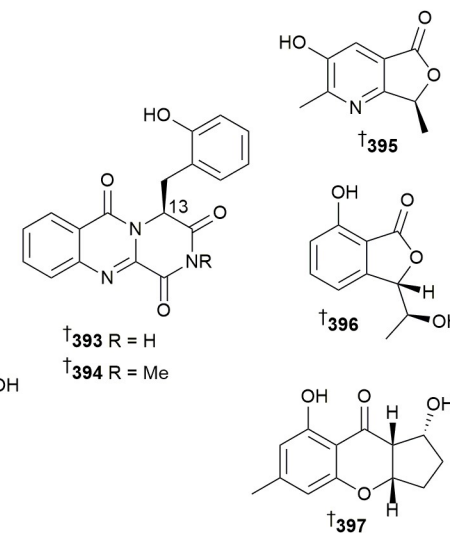

- 173** Ascomycota *Aspergillus* sp // (gorgonian, *Melitodes squamata*) Sanya, Hainan Province, China // Antifungal peptides from the marine gorgonian-associated fungus *Aspergillus* sp. SCSIO41501  
**386** // N // maribasin C // IA to weak inhib. vs 5 fungi.  
**387** // N // maribasin D // IA to weak inhib. vs 5 fungi.  
**388** // N // maribasin E // IA to weak inhib. vs 5 fungi.  
**389** // N // aspergillipeptide H // IA vs 4 fungi.  
**390** // N // aspergillipeptide I // IA vs 4 fungi.  
**391** // N // aspergillipeptide J // IA vs 4 fungi.  
**392** // N // aspergillipeptide K // IA vs 4 fungi.
- 174** Ascomycota *Aspergillus* sp // (soft coral, *Simularia* sp.) South China Sea // 17-Hydroxybrevianamide N and its N1-methyl derivative, quinazolinones from a soft-coral-derived *Aspergillus* sp. fungus: 13S enantiomers as the true natural products  
**393** // N // (+)-17-hydroxybrevianamide N // IA vs 3 microb. strains; IA vs 1 fungus; IA vs 1 virus.  
**394** // N // (+)-N1-methyl-17-hydroxybrevianamide N // IA vs 3 microb. strains; IA vs 1 fungus; IA vs 1 virus.
- 175** Ascomycota *Aspergillus* sp // (unspecified/unidentified coral) Sanya Bay, South China Sea // New azaphthalide and phthalide derivatives from the marine coral-derived fungus *Aspergillus* sp. SCSIO41405  
**395** // N // (S)-3-hydroxy-2,7-dimethylfuro[3,4-b]pyridin-5(7H)-one // IA vs 7 mirob, strains; IA vs AChE; IA vs pancreatic lipase.  
**396** // N // (S)-7-hydroxy-3-((S)-1-hydroxyethyl)isobenzofuran-1(3H)-one // IA vs 7 mirob, strains; IA vs AChE; IA vs pancreatic lipase.
- 176** Ascomycota *Aspergillus* sp // (sponge, *Haliclona* sp.) Lingshui, Hainan Province, China // A new antibacterial chromone from a marine sponge-associated fungus *Aspergillus* sp. LS57  
**397** // N // aspergilluone A // IA to weak inhib. vs 5 microb. strains.

2 Marine microorganisms and phytoplankton:

2.3 Marine-sourced fungi (excluding from mangroves)

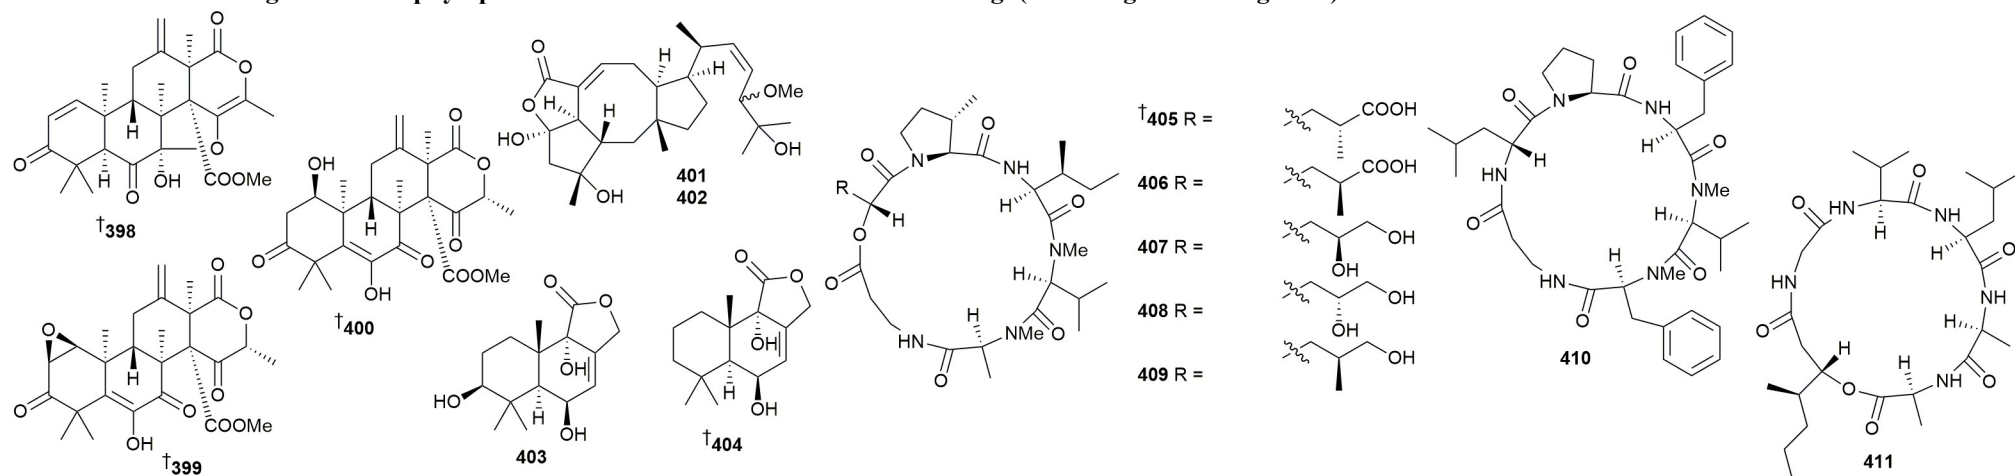

177 Ascomycota *Aspergillus* sp // (red alga, *Rhodomela confervoides*) Yantai, Shandong Province of China // Terpenoids from the marine-derived fungus *Aspergillus* sp. RR-YLW-12, associated with the red alga *Rhodomela confervoides*

398 // N // aspermeroterpene D // IA vs 4 microb. strains; IA vs 3 phytoplankton.

399 // N // aspermeroterpene E // IA vs 4 microb. strains; IA to weak inhib. vs 3 phytoplankton.

400 // R // terretonin E // IA vs 4 microb. strains; IA vs 3 phytoplankton.

401 // N // (+)-18,19-dihydro-18-methoxy-19-hydroxyophiobolin P // IA vs 4 microb. strains; IA vs 3 phytoplankton.

402 // N // (-)-18,19-dihydro-18-methoxy-19-hydroxyophiobolin P // IA vs 4 microb. strains; IA vs 3 phytoplankton.

403 // N // 3*S*-hydroxystrobilactone A // IA vs 4 microb. strains; IA vs 3 phytoplankton.

404 // N // 6-*epi*-strobilactone A // IA vs 4 microb. strains; IA to weak inhib. vs 3 phytoplankton.

178 Ascomycota *Beauveria felina* // (sponge, *Xestospongia testudinaria*) South China Sea // Discovery of cyclodepsipeptides with anti-Zika virus activities and biosynthesis of the nonproteinogenic building block (3*S*)-methyl-L-proline.

405 // N // felinotoxin A // IA vs 1 virus.

406 // N // felinotoxin B // IA vs 1 virus.

407 // N // felinotoxin C // IA vs 1 virus.

408 // N // felinotoxin D // IA vs 1 virus.

409 // N // felinotoxin E // IA vs 1 virus.

410 // N // felinotoxin F // IA vs 1 virus.

411 // N // felinotoxin G // IA vs 1 virus.

## 2 Marine microorganisms and phytoplankton:

## 2.3 Marine-sourced fungi (excluding from mangroves)

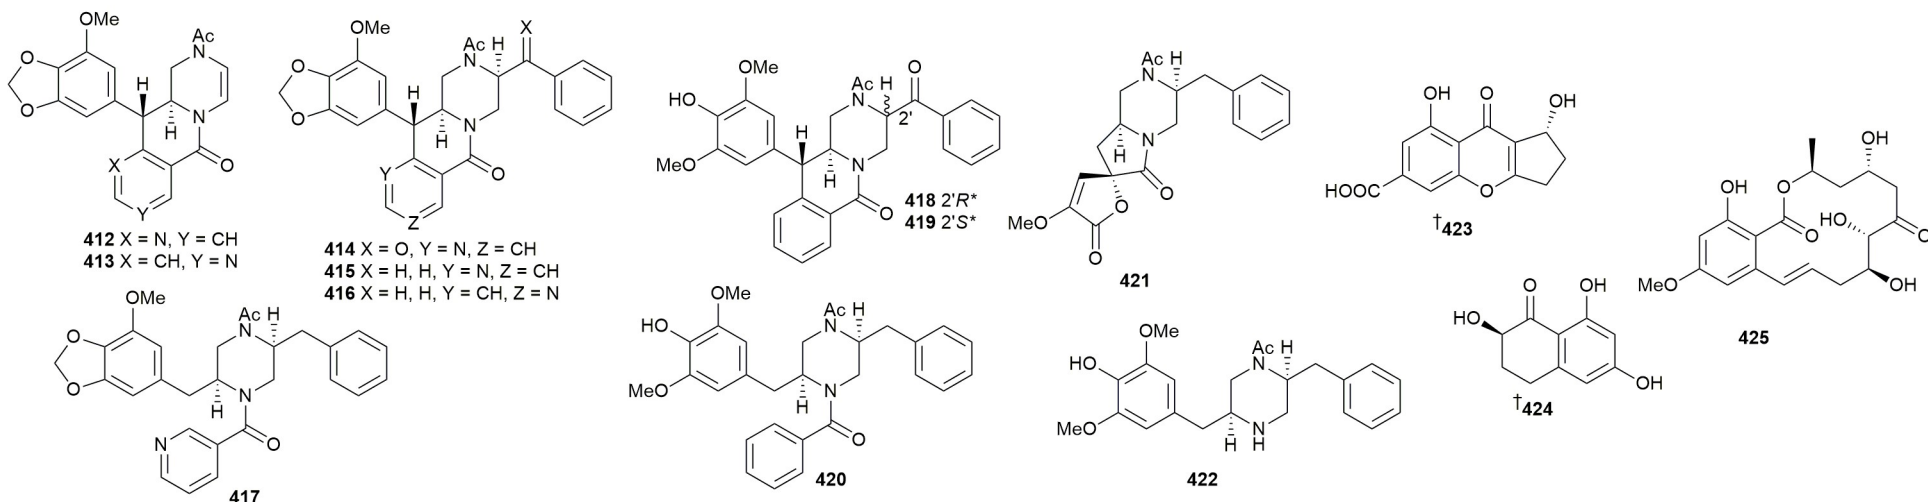

**179** Ascomycota *Chryso sporium lobatum* // (fish, *Mugil* mullet) fish market, Brisbane, Australia // Precursor-directed biosynthesis mediated amplification of minor aza phenylpropanoid piperazines in an Australian marine fish-gut-derived fungus, *Chryso sporium* sp. CMB-F214

**412** // N // azachryso sporazine A1 // mod. inhib. P-glycoprotein; IA vs 3 microb. strains and vs 1 fungus; IA vs 1 HTCL.

**413** // N // azachryso sporazine A2 // mod. inhib. P-glycoprotein; IA vs 3 microb. strains and vs 1 fungus; IA vs 1 HTCL.

**414** // N // azachryso sporazine B1 // mod. inhib. P-glycoprotein; IA vs 3 microb. strains and vs 1 fungus; IA vs 1 HTCL.

**415** // N // azachryso sporazine C1 // mod. inhib. P-glycoprotein; IA vs 3 microb. strains and vs 1 fungus; IA vs 1 HTCL.

**416** // N // azachryso sporazine C2 // mod. inhib. P-glycoprotein; IA vs 3 microb. strains and vs 1 fungus; IA vs 1 HTCL.

**417** // N // azachryso sporazine D1 // weak inhib. P-glycoprotein; IA vs 3 microb. strains and vs 1 fungus; IA vs 1 HTCL.

**418** // N // chryso sporazine N // weak inhib. P-glycoprotein; IA vs 3 microb. strains and vs 1 fungus; IA vs 1 HTCL.

**419** // N // chryso sporazine O // weak inhib. P-glycoprotein; IA vs 3 microb. strains and vs 1 fungus; IA vs 1 HTCL.

**420** // N // chryso sporazine P // weak inhib. P-glycoprotein; IA vs 3 microb. strains and vs 1 fungus; IA vs 1 HTCL.

**421** // N // spirochryso sporazine A // weak inhib. P-glycoprotein; IA vs 3 microb. strains and vs 1 fungus; IA vs 1 HTCL.

**422** // N // chryso sporazine Q // weak inhib. P-glycoprotein; IA vs 3 microb. strains and vs 1 fungus; IA vs 1 HTCL.

**180** Ascomycota *Cladosporium halotolerans* // (coral, *Porites lutea*) Weizhou Islands, Guangxi Zhuang autonomous region, China // Cytotoxic benzopyranone and xanthone derivatives from a coral symbiotic fungus *Cladosporium halotolerans* GXIMD 02502

**423** // N // coniochaetone K // IA to weak cytotox. vs 2 HTCLs; IA vs 1 nHCL.

**181** Ascomycota *Cladosporium* sp // (sediment) Western Pacific // Tetralone derivatives from a deep-sea-derived fungus *Cladosporium* sp. HDN17-58

**424** // N // aladothalen // IA to weak inhib. vs 8 microb strains.

**182** Ascomycota *Cochliobolus lunatus*, Ascomycota *Curvularia lunata* // (zoanthid, *Palythoa haddoni*) Weizhou coral reef, South China Sea // Cochliomycin G, a 14-membered resorcylic acid lactone from a marine-derived fungus *Cochliobolus lunatus*

**425** // N // cochliomycin G // IA to pot. inhib. vs 5 phytoplankton; IA vs 5 microb. strains.

2 Marine microorganisms and phytoplankton: 2.3 Marine-sourced fungi (excluding from mangroves)

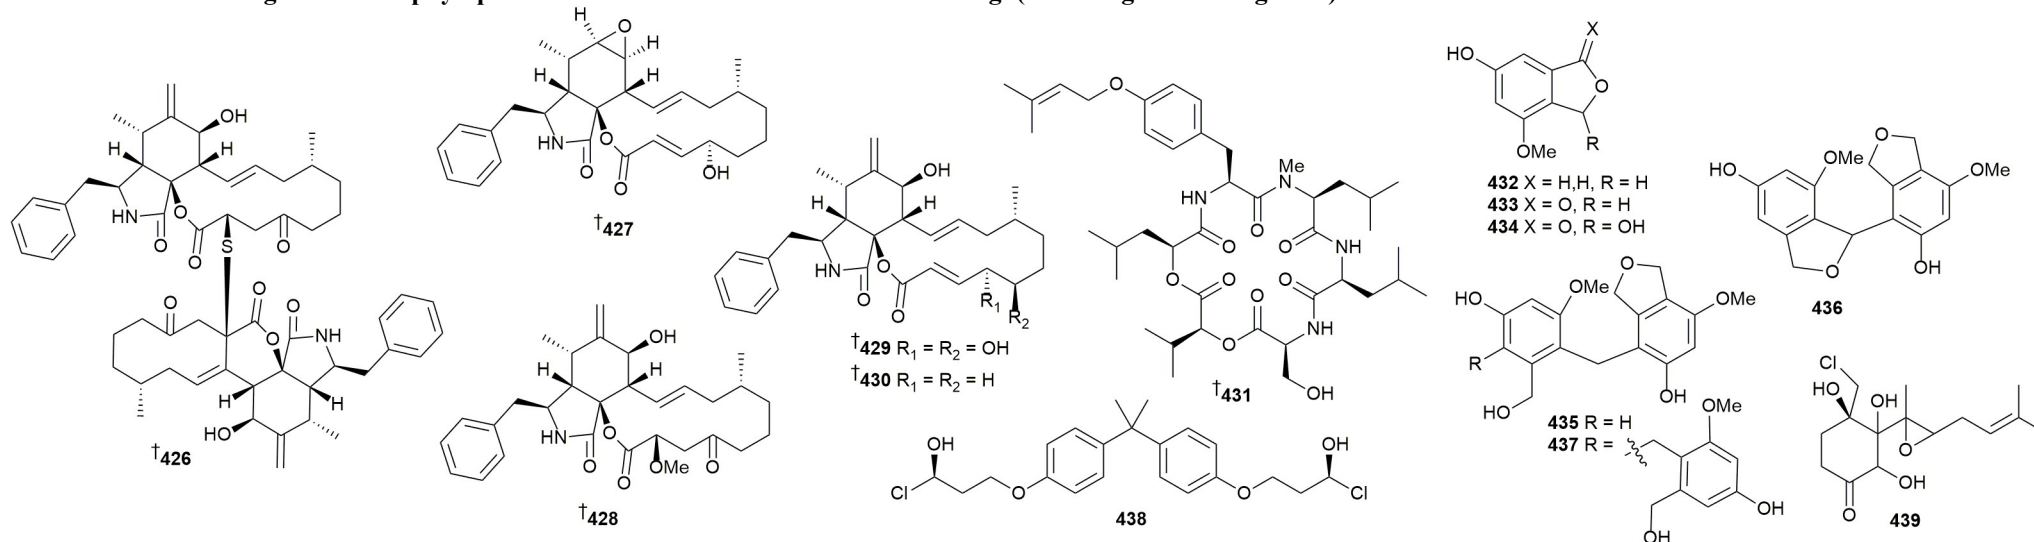

- 183** Ascomycota *Curvularia verruculosa* // (squat lobster, *Shinkaia crosnieri*) South China Sea // Cytochalasin derivatives from the endozoic *Curvularia verruculosa* CS-129, a fungus isolated from the deep-sea squat lobster *Shinkaia crosnieri* living in the cold seep environment  
**426** // N // verruculoid A // mod. inhib. vs 1 microb. strain, IA vs 8 microb. strains; NT vs 3 HTCLs.  
**427** // N // 12-nor-cytochalasin F // IA vs 9 microb. strains; NT vs 3 HTCLs.  
**428** // N // 22-methoxycytochalasin B6 // IA vs 9 microb. strains; NT vs 3 HTCLs.  
**429** // N // 19-hydroxycytochalasin B // IA vs 9 microb. strains; weak cytotox. vs 3 HTCLs.  
**430** // N // 20-deoxy-cytochalasin B // IA vs 9 microb. strains; IA vs 3 HTCLs.
- 184** Ascomycota *Cymostachys* sp // (sponge, *Aptos* sp.) Apo Island, Philippines // Targeted isolation of a cytotoxic cyclic hexadepsipeptide from the mesophotic zone sponge-associated fungus *Cymostachys* sp. NBUF082  
**431** // N // cymodepsipeptide // IA to weak cytotox. vs 2 HTCLs.
- 185** Ascomycota *Cymostachys* sp // (sponge, *Aptos* sp.) Apo Island, Negros Oriental, Philippines // Discovery of cymopolyphenols A–F from a marine mesophotic zone *Aptos* sponge-associated fungus *Cymostachys* sp. NBUF082  
**432** // N // cymopolyphenol A // IA vs 2 HTCLs; IA vs 8 microb. strains; IA vs iron chelation (ferrozine); IA vs PR1 activation.  
**433** // N // cymopolyphenol B // NT  
**434** // N // cymopolyphenol C // IA vs 2 HTCLs; IA to weak inhib. vs 8 microb. strains; IA vs iron chelation (ferrozine); IA vs PR1 activation.  
**435** // N // cymopolyphenol D // IA vs 2 HTCLs; IA to weak inhib. vs 8 microb. strains; IA vs iron chelation (ferrozine); IA vs PR1 activation.  
**436** // N // cymopolyphenol E // IA vs 2 HTCLs; IA to weak inhib. vs 8 microb. strains. weak iron chelation (ferrozine); IA vs PR1 activation.  
**437** // N // cymopolyphenol F // IA vs 2 HTCLs; IA to weak inhib. vs 8 microb. strains; IA vs iron chelation (ferrozine); IA vs PR1 activation.
- 186** Ascomycota *Dichotomomyces cejpui*, Ascomycota *Aspergillus cejpui* // soft coral, *Lobophyton crassum*) Hainan Sanya National Coral Reef Reserve, P. R. China // Reactive oxygen species altering the metabolite profile of the marine-derived fungus *Dichotomomyces cejpui* F31-1  
**438** // N // dichocetide D // IA vs 3 HTCLs.
- 187** Basidiomycota *Digitatispora marina* // (driftwood, *Betula* sp.) Vannøya, Norway // Chlovalicin B, a chlorinated sesquiterpene isolated from the marine mushroom *Digitatispora marina*  
**439** // N // chlovalicin B // IA vs 1 HTCL, 1 nHCL and 1 fungus.

Key: Main article bibliography reference // Taxonomy // Location // Article title  
 Compound number // Status // Compound name // Biological activity and Other information

## 2 Marine microorganisms and phytoplankton:

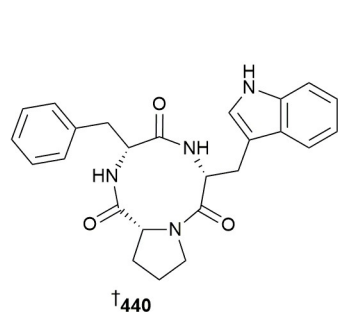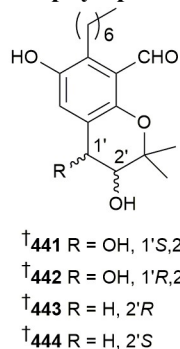

## 2.3 Marine-sourced fungi (excluding from mangroves)

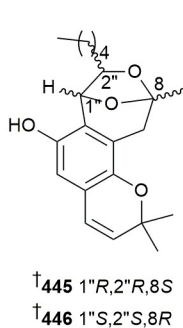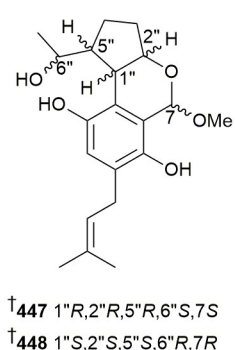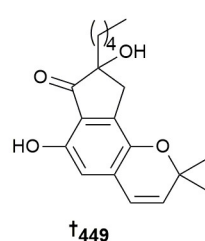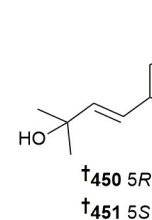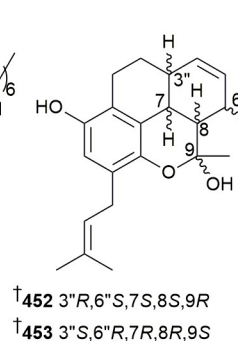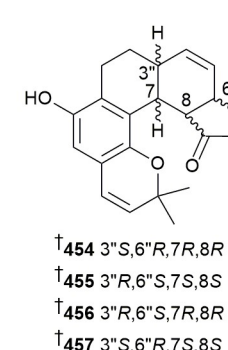

- 188** Ascomycota *Epicoccum nigrum* // (seagrass, *Thalassia hemprichii*) Makady bay, South Hurghada, Egypt // Antimicrobial and antibiofilm activities of the fungal metabolites isolated from the marine endophytes *Epicoccum nigrum* M13 and *Alternaria alternata* 13A  
**440** // N // epicotripeptin // IA to mod. inhib. vs 6 microb. strains; IA vs 1 fungus
- 189** Ascomycota *Eurotium* sp // (sediment) South China Sea // Salicylaldehyde derivatives from a marine-derived fungus *Eurotium* sp. SCSIO F452  
**441** // N // (+)-salicylaldehydium A // IA vs 2 HTCLs; IA vs antioxid. (DPPH).  
**442** // N // (-)-salicylaldehydium A // IA vs 2 HTCLs; IA vs antioxid. (DPPH).  
**443** // N // (+)-salicylaldehydium B // IA vs 2 HTCLs; IA vs antioxid. (DPPH).  
**444** // N // (-)-salicylaldehydium B // IA vs 2 HTCLs; IA vs antioxid. (DPPH).
- 190** Ascomycota *Eurotium* sp // (sediment) South China Sea // Structurally diverse polycyclic salicylaldehyde derivative enantiomers from a marine-derived fungus *Eurotium* sp. SCSIO F452  
**445** // N // (+)-eurotacin F // IA vs 4 HTCLs; IA vs 2 microb. strains; IA vs antioxid. (DPPH); IA vs  $\alpha$ -glucosidase.  
**446** // N // (-)-eurotacin F // IA vs 4 HTCLs; IA vs 2 microb. strains; IA vs antioxid. (DPPH); IA vs  $\alpha$ -glucosidase.  
**447** // N // (+)-eurotacin G // IA vs 4 HTCLs; IA vs 2 microb. strains; IA vs antioxid. (DPPH); IA vs  $\alpha$ -glucosidase.  
**448** // N // (-)-eurotacin G // IA vs 4 HTCLs; IA vs 2 microb. strains; IA vs antioxid. (DPPH); IA vs  $\alpha$ -glucosidase.  
**449** // N // ( $\pm$ )-eurotacin H // IA vs 4 HTCLs; IA vs 2 microb. strains; IA vs antioxid. (DPPH); IA vs  $\alpha$ -glucosidase.  
**450** // N // (+)-eurotacin I // IA vs 4 HTCLs; IA vs 2 microb. strains; IA vs antioxid. (DPPH); IA vs  $\alpha$ -glucosidase.  
**451** // N // (-)-eurotacin I // IA vs 4 HTCLs; IA vs 2 microb. strains; IA vs antioxid. (DPPH); IA vs  $\alpha$ -glucosidase.
- 191** Ascomycota *Eurotium* sp // (sediment) South China Sea // Euroticipins C–E, three pairs of polycyclic salicylaldehyde derivative enantiomers from a marine-derived fungus *Eurotium* sp. SCSIO F452  
**452** // N // (+)-eurotacin C // IA vs 4 HTCLs; IA vs  $\alpha$ -glucosidase; IA vs tyrosinase; IA vs antioxid. (DPPH).  
**453** // N // (-)-eurotacin C // IA vs 4 HTCLs; IA vs  $\alpha$ -glucosidase; IA vs tyrosinase; IA vs antioxid. (DPPH).  
**454** // N // (+)-eurotacin D // NT.  
**455** // N // (-)-eurotacin D // NT.  
**456** // N // (+)-eurotacin E // IA vs 4 HTCLs; IA vs  $\alpha$ -glucosidase; IA vs tyrosinase; IA vs antioxid. (DPPH).  
**457** // N // (-)-eurotacin E // IA vs 4 HTCLs; IA vs  $\alpha$ -glucosidase; IA vs tyrosinase; IA vs antioxid. (DPPH).



## 2 Marine microorganisms and phytoplankton:

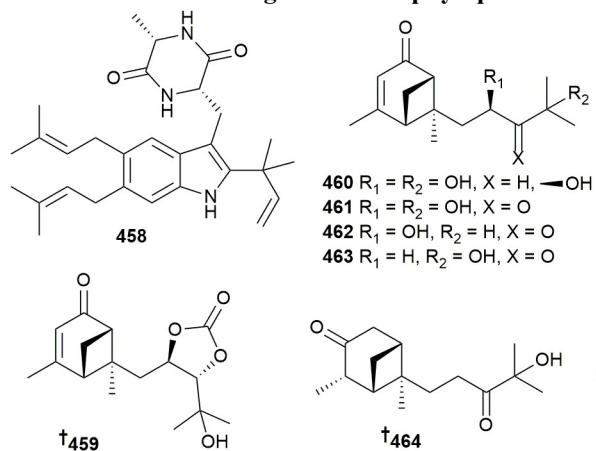

## 2.3 Marine-sourced fungi (excluding from mangroves)

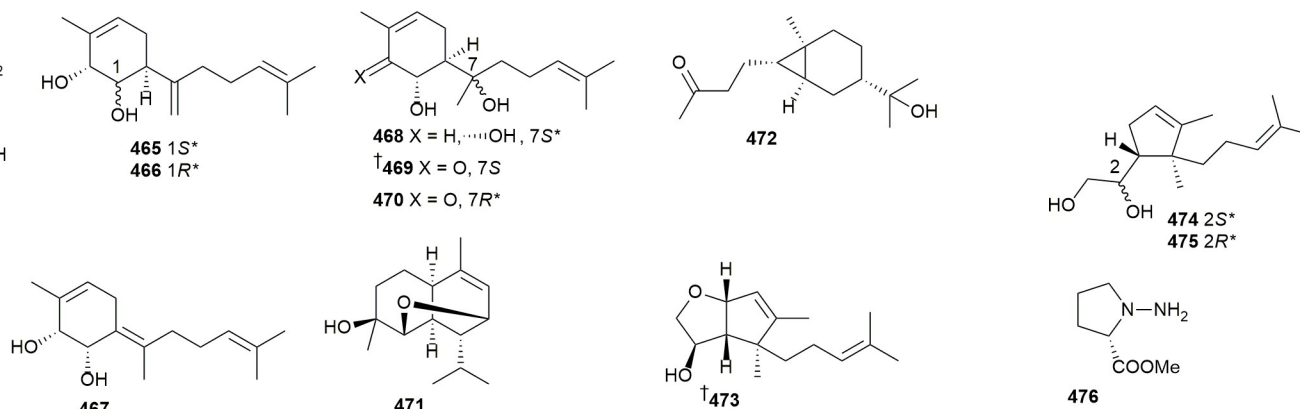

**192** Ascomycota *Eurotium* sp // (sponge, *Ircinia variabilis*) // Fintiamin: a diketopiperazine from the marine sponge-derived fungus *Eurotium* sp.

458 // N // fintiamin // weak binding affinity for cannabinoid CB1 receptor; IA vs binding at CB2 receptor.

**193** Ascomycota *Eutypella* sp // (sediment) South Atlantic Ocean // Chemical epigenetic manipulation triggers the production of sesquiterpenes from the deep-sea derived *Eutypella* fungus

459 // N // eutypeterpene A // IA vs NO prod.

460 // N // eutypeterpene B // IA vs NO prod.

461 // N // eutypeterpene C // IA vs NO prod.

462 // N // eutypeterpene D // IA vs NO prod.

463 // N // eutypeterpene E // IA vs NO prod.

464 // N // eutypeterpene F // IA vs NO prod.

465 // N // eutypeterpene G // IA vs NO prod.

466 // N // eutypeterpene H // IA vs NO prod.

467 // N // eutypeterpene I // IA vs NO prod.

468 // N // eutypeterpene J // IA vs NO prod.

469 // N // eutypeterpene K // IA vs NO prod.

470 // N // eutypeterpene L // IA vs NO prod.

471 // N // eutypeterpene M // IA vs NO prod.

472 // N // eutypeterpene N // weak inhib. NO prod.

473 // N // eutypeterpene O // IA vs NO prod.

474 // N // eutypeterpene P // IA vs NO prod.

475 // N // eutypeterpene Q // IA vs NO prod.

**194** Ascomycota *Evlachovaea* sp // (fish, *Mugil* mullet) fish market, Brisbane, Australia // *N*-Amino-L-proline methyl ester from an Australian fish gut-derived fungus: challenging the distinction between natural product and artifact

476 // N // *N*-amino-L-proline methyl ester // NT.

## 2 Marine microorganisms and phytoplankton:

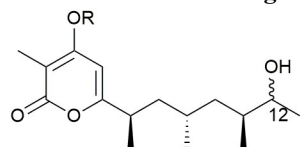

477 R = H, 12S\*  
478 R = H, 12R\*  
481 R = Me, 12S\*  
482 R = Me, 12R\*

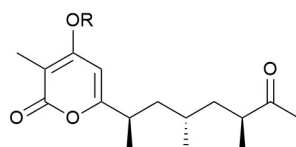

479 R = H  
480 R = Me

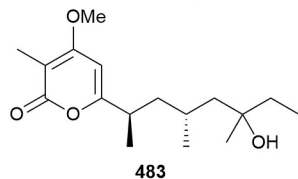

483

## 2.3 Marine-sourced fungi (excluding from mangroves)

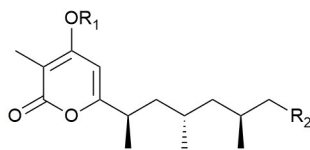

484 R<sub>1</sub> = Me, R<sub>2</sub> = COOH  
485 R<sub>1</sub> = Me, R<sub>2</sub> = CH<sub>2</sub>OH  
486 R<sub>1</sub> = H, R<sub>2</sub> = CH<sub>2</sub>OH

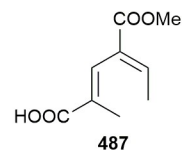

487

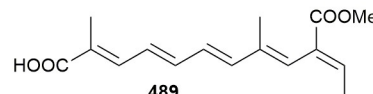

489

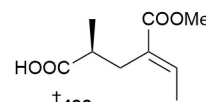

†488

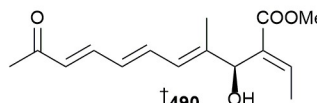

†490

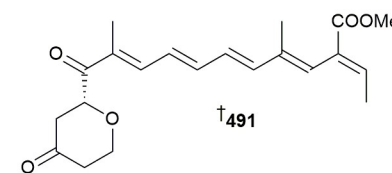

†491

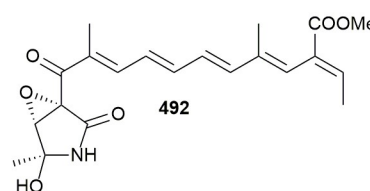

492

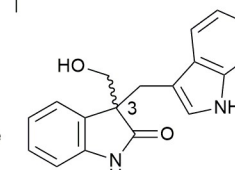

†493 3S

†494 3R

**195** Ascomycota *Fusarium decemcellulare*, Ascomycota *Albonectria rigidiuscula* // (seawater) Lingshui Xincungang and Li'angang Seagrass Special Protected Area, Hainan Province, China // Absolute configuration of polypropionate derivatives: decempyrone A-J and their MptpA inhibition and anti-inflammatory activities

477 // N // decempyrone A // IA vs MptpA and MptpB; IA vs NO prod.

478 // N // decempyrone B // IA vs MptpA and MptpB; IA vs NO prod.

479 // N // decempyrone C // IA vs MptpA and MptpB; IA vs NO prod.

480 // N // decempyrone D // IA vs MptpA and MptpB; IA vs NO prod.

481 // N // decempyrone E // IA vs MptpA and MptpB; IA vs NO prod.

482 // N // decempyrone F // IA vs MptpA and MptpB; IA vs NO prod.

483 // N // decempyrone G // IA vs MptpA and MptpB; IA vs NO prod.

484 // N // decempyrone H // IA vs MptpA and MptpB; IA vs NO prod.

485 // N // decempyrone I // IA vs MptpA and MptpB; IA vs NO prod.

486 // N // decempyrone J // IA vs MptpA and MptpB; IA vs NO prod.

**196** Ascomycota *Fusarium solani*, Ascomycota *Neocosmospora solani* // (seawater) South China Sea // Fusarins G–L with inhibition of NO in RAW264.7 from marine-derived fungus *Fusarium solani* 7227

487 // N // fusarin G // IA vs NO prod.

488 // N // fusarin H // IA vs NO prod.

489 // N // fusarin I // IA vs NO prod.

490 // N // fusarin J // IA vs NO prod.

491 // N // fusarin K // IA vs NO prod.

492 // N // fusarin L // IA vs NO prod.

**197** Ascomycota *Fusarium* sp // (unspecified source) Hainan Sanya National Coral Reef Reserve, P. R. China // A pair of novel bisindole alkaloid enantiomers from marine fungus *Fusarium* sp. XBB-9

493 // N // (+)-fusaspoid A // IA vs 2 HTCLs.

494 // N // (–)-fusaspoid A // IA vs 2 HTCLs.

## 2 Marine microorganisms and phytoplankton:

## 2.3 Marine-sourced fungi (excluding from mangroves)

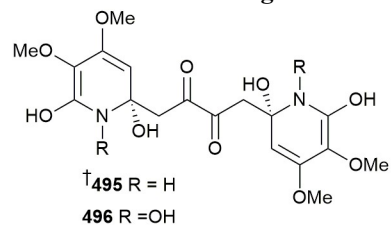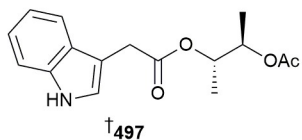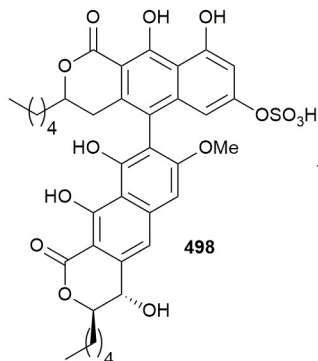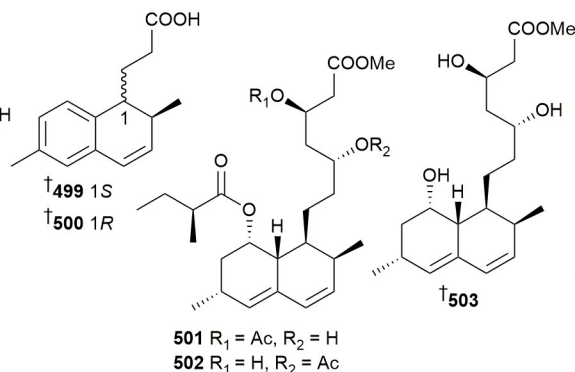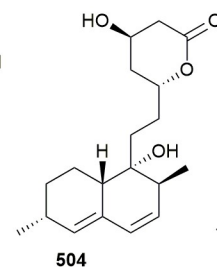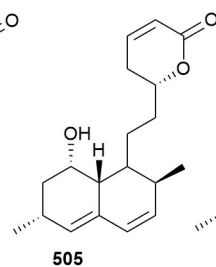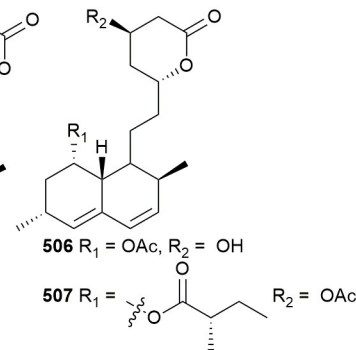

- 198** Ascomycota *Fusarium* sp // (sponge, *Suberea mollis*) Yanbu, Saudi Red Sea, Saudi Arabia // Fusaripyridines A and B; highly oxygenated antimicrobial alkaloid dimers featuring an unprecedented 1,4-bis(2-hydroxy-1,2-dihydropyridin-2-yl)butane-2,3-dione core from the marine fungus *Fusarium* sp. LY019  
**495** // N // fusaripyridine A // IA vs 1 HTCL; IA vs 2 microb. strains and vs 1 fungus.  
**496** // N // fusaripyridine B // IA vs 1 HTCL; IA vs 2 microb. strains and vs 1 fungus.
- 199** Ascomycota *Lecanicillium fusisporum* // (unspecified/unidentified sea cucumber) Xisha Islands // Alkaloids from the marine fungus *Lecanicillium fusisporum* using an amino acid-directed strategy  
**497** // N // lecasporinoid // IA vs 1 virus.
- 200** Ascomycota // (driftwood) Kongsfjord, Berlevåg Norway // Lulworthinone, a new dimeric naphthopyrone from a marine fungus in the family Lulworthiaceae with antibacterial activity against clinical methicillin-resistant *Staphylococcus aureus* isolates  
**498** // N // lulworthinone // mod inhib. to IA vs 21 microb. strains; weak cytotox. vs 2 HTCLs and 1 nHCL.
- 201** Ascomycota *Monascus albidulus* // (bivalve mollusc, *Meretrix lusoria*) Hailing Island, Yangjiang, China // Monalbidins A–E, decalins with potential cytotoxic activities from marine derived fungus *Monascus albidus* BB3  
**499** // N // monalbidin A // IA vs 8 HTCLs and vs 2 nHCLs.  
**500** // N // monalbidin B // IA vs 8 HTCLs and vs 2 nHCLs.  
**501** // N // monalbidin C // IA vs 8 HTCLs and vs 2 nHCLs.  
**502** // N // monalbidin D // IA vs 8 HTCLs; IA to mod. cytotox. vs 2 nHCLs.  
**503** // N // monalbidin E // IA vs 8 HTCLs and vs 2 nHCLs.  
**504** // N // 1-hydroxymonacolin L // IA vs 8 HTCLs and vs 2 nHCLs.  
**505** // N // dehydromonacolin J // IA vs 8 HTCLs and vs 2 nHCLs.  
**506** // N // 8-O-acetylmonacolin J // IA vs 8 HTCLs and vs 2 nHCLs.  
**507** // N // O-acetylmonacolin K // IA vs 8 HTCLs; IA to weak cytotox. vs 2 nHCLs.

**2 Marine microorganisms and phytoplankton:**

**2.3 Marine-sourced fungi (excluding from mangroves)**

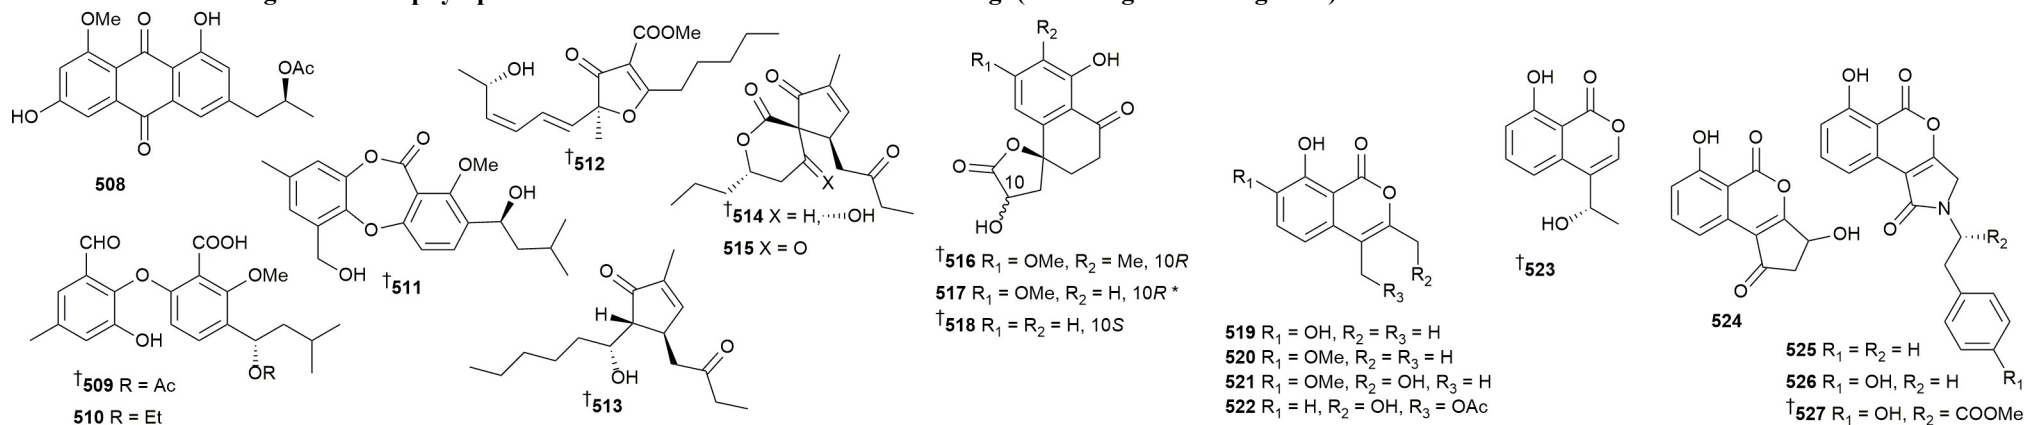

- 202** Ascomycota *Neosartorya spinosa*, Ascomycota *Aspergillus fischeri* // (sponge, *Mycale* sp.) Samae San Island, Chonburi province, Thailand // Anthraquinones, diphenyl ethers, and their derivatives from the culture of the marine sponge-associated fungus *Neosartorya spinosa* KUFA 1047
- 508** // N // acetylpenipurdin A // IA vs 4 microb. strains; IA vs AChE; IA vs tyrosinase.
- 509** // R // tenellic acid C // IA vs 4 microb. strains; IA vs AChE; IA vs tyrosinase.
- 510** // N // neospinosic acid // IA vs 4 microb. strains; IA vs AChE; IA vs tyrosinase.
- 511** // N // spinolactone // IA vs 4 microb. strains; IA vs AChE; IA vs tyrosinase.
- 203** Ascomycota *Paraconiothyrium hawaiiense*, Ascomycota *Paracamarosporium hawaiiense* // (sediment) Indian Ocean // Hawatides A-G, new polyketides from the deep-sea-derived fungus *Paraconiothyrium hawaiiense* FS482
- 512** // N // hawatide A // IA vs NO prod.; IA vs 4 HTCLs.
- 513** // N // hawatide B // IA vs NO prod.; IA vs 4 HTCLs.
- 514** // N // hawatide C // IA vs NO prod.; IA vs 4 HTCLs.
- 515** // N // hawatide D // IA vs NO prod.; IA vs 4 HTCLs.
- 516** // N // hawatide E // IA vs NO prod.; IA vs 4 HTCLs.
- 517** // N // hawatide F // IA vs NO prod.; IA vs 4 HTCLs.
- 518** // N // hawatide G // IA vs NO prod.; IA vs 4 HTCLs.
- 204** Ascomycota *Paraphoma* sp // (sediment) Shenzhen, China // New isocoumarin analogues from the marine-derived fungus *Paraphoma* sp. CUGBMF180003
- 519** // N // 7-hydroxyoospolactone // weak inhib. vs 1 microb. strain; IA vs 1 fungus.
- 520** // N // 7-methoxyoospolactone // IA vs 1 microb. strain; IA vs 1 fungus.
- 521** // N // 7-methoxy-9-hydroxyoospolactone // IA vs 1 microb. strain; IA vs 1 fungus.
- 522** // N // 10-acetoxy-9-hydroxyoospolactone // IA vs 1 microb. strain; IA vs 1 fungus.
- 523** // N // 6-dehydroxysescandelin // IA vs 1 microb. strain; IA vs 1 fungus.
- 524** // N // parapholactone // weak inhib. vs 1 microb. strain; IA vs 1 fungus.
- 525** // N // paraphamide A // IA vs 1 microb. strain; IA vs 1 fungus.
- 526** // N // paraphamide B // IA vs 1 microb. strain; IA vs 1 fungus.
- 527** // N // paraphamide C // IA vs 1 microb. strain; IA vs 1 fungus.

**2 Marine microorganisms and phytoplankton:**

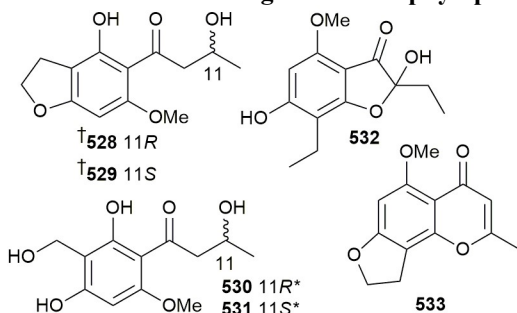

**2.3 Marine-sourced fungi (excluding from mangroves)**

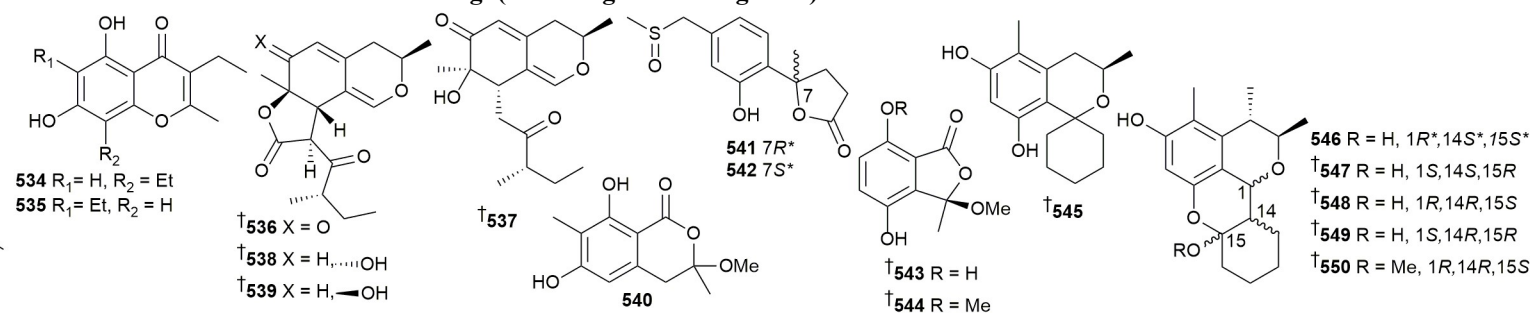

- 205** Ascomycota *Parengyodontium album* // (coral, *Montipora foliosa*) South China Sea // Structures and absolute configurations of phomalones from the coral-associated fungus *Parengyodontium album* sp. SCSIO 40430  
**528** // N // (-)-phomalichenone H // IA vs 6 microb. strains.  
**529** // N // (+)-phomalichenone H // IA vs 6 microb. strains.  
**530** // N // (-)-phomalichenone I // IA vs 6 microb. strains.  
**531** // N // (+)-phomalichenone I // IA vs 6 microb. strains.  
**532** // N // phomalichenone J // IA vs 6 microb. strains.  
**533** // N // phomalichenone K // IA vs 6 microb. strains.  
**534** // N // phomalichenone L // IA vs 6 microb. strains.  
**535** // N // phomalichenone M // IA vs 6 microb. strains.
- 206** Ascomycota *Penicillium chermesinum* // (sediment) South China Sea // Azaphilones and isocoumarin derivatives from *Penicillium chermesinum* FS625 isolated from the South China Sea  
**536** // N // chermesinon D // IA vs 4 HTCLs.  
**537** // N // chermesinon E // IA vs 4 HTCLs.  
**538** // N // chermesinon F // IA vs 4 HTCLs.  
**539** // N // chermesinon G // IA vs 4 HTCLs.  
**540** // N // 6,8-dihydroxy-3-methoxy-3,7-dimethylisochroman-1-one // IA vs 4 HTCLs.
- 207** Ascomycota *Penicillium chrysogenum* // (red alga, *Grateloupia turuturu*) Qingdao coastal zone, China // New enantiomers of a nor-bisabolane derivative and two new phthalides produced by the marine-derived fungus *Penicillium chrysogenum* LD-201810  
**541** // N // (+)-methylsulfinyl-1-hydroxyboivinianin A // IA vs 4 fungi; IA vs 6 HTCLs.  
**542** // N // (-)-methylsulfinyl-1-hydroxyboivinianin A // IA vs 4 fungi; IA vs 6 HTCLs.  
**543** // N // chrysoalide A // IA vs 4 fungi; IA vs 6 HTCLs.  
**544** // N // chrysoalide B // IA to weak inhib. vs 4 fungi; IA vs 6 HTCLs.
- 208** Ascomycota *Penicillium citrinum* // (soft coral, *Simularia cf. molesta*) Yongxing Island, Paracel Islands // Penitol A and penicitols E-I: citrinin derivatives from *Penicillium citrinum* and the structure revision of previously proposed analogues  
**545** // N // penitol A // IA to weak cytotox. vs 8 HTCLs; IA to weak inhib. vs 6 microb. strains.  
**546** // N // penicitol E // IA vs 8 HTCLs; IA vs 6 microb. strains.  
**547** // N // penicitol F // IA vs 8 HTCLs; IA vs 6 microb. strains.  
**548** // N // penicitol G // IA vs 8 HTCLs; IA vs 6 microb. strains.  
**549** // N // penicitol H // IA vs 8 HTCLs, NT vs 5; IA to weak inhib. vs 6 microb. strains.  
**550** // R // penicitol A // IA vs 8 HTCLs; IA vs 6 microb. strains.

## 2 Marine microorganisms and phytoplankton:

## 2.3 Marine-sourced fungi (excluding from mangroves)

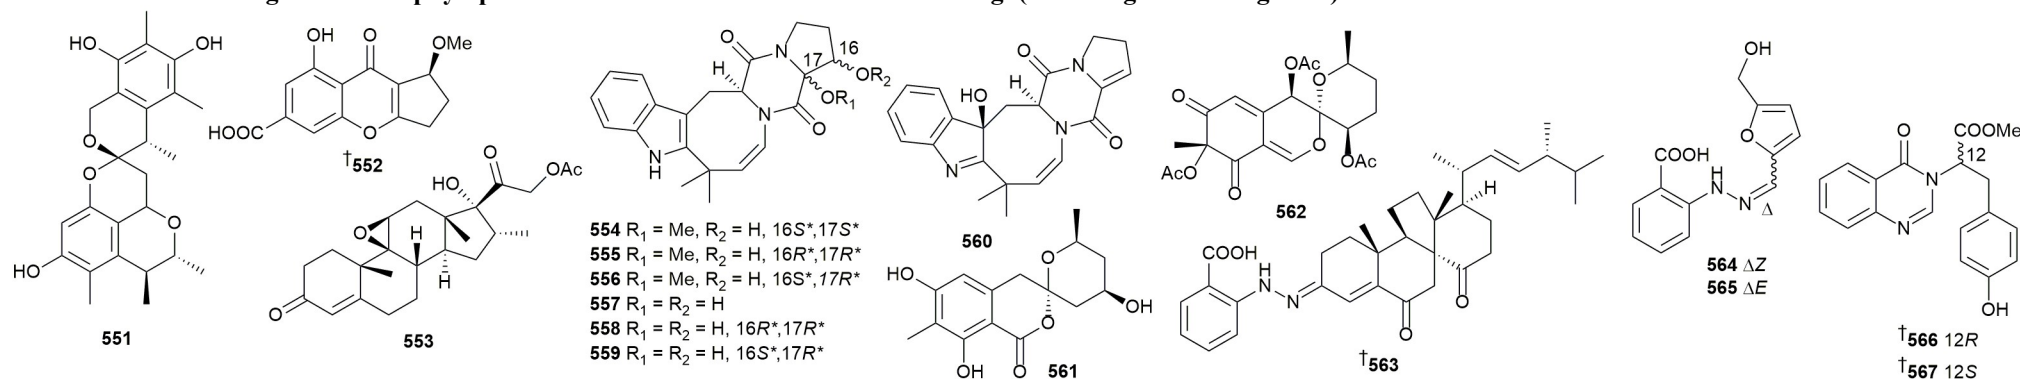

- 209** Ascomycota *Penicillium citrinum* // (sponge, *Callyspongia* sp.) Xuwen County, Guangdong Province, China // Cytotoxicity of polyketides and steroids isolated from the sponge-associated fungus *Penicillium citrinum* SCSIO 41017  
**551** // N // xerucitrinin A // IA vs 4 HTCLs.  
**552** // N // coniochaetone M // IA vs 4 HTCLs.  
**553** // N // 16α-methylpregna-17α,19-dihydroxy-(9,11)-epoxy-4-ene-3,18-dione-20-acetoxy // IA vs 4 HTCLs.
- 210** Ascomycota *Penicillium dimorphosporum* // (unspecified/unidentified soft coral) South China Sea // New deoxyisoaustamide derivatives from the coral-derived fungus *Penicillium dimorphosporum* KMM 4689  
**554** // N // 16α-hydroxy-17β-methoxy-deoxydihydroisoaustamide // IA vs 2 nHCLs; no neuroprotective activ. (paraquat in Neuro-2a cells).  
**555** // N // 16β-hydroxy-17α-methoxy-deoxydihydroisoaustamide // IA vs 2 nHCLs; no neuroprotective activ. (paraquat in Neuro-2a cells).  
**556** // N // 16α-hydroxy-17α-methoxy-deoxydihydroisoaustamide // IA vs 2 nHCLs; no neuroprotective activ. (paraquat in Neuro-2a cells).  
**557** // N // 16,17-dihydroxy-deoxydihydroisoaustamide // IA vs 2 nHCLs; weak neuroprotective activ. (paraquat in Neuro-2a cells).  
**558** // N // 16β,17α-dihydroxy-deoxydihydroisoaustamide // IA vs 2 nHCLs; weak neuroprotective activ. (paraquat in Neuro-2a cells).  
**559** // N // 16α,17α-dihydroxy-deoxydihydroisoaustamide // IA vs 2 nHCLs; weak neuroprotective activ. (paraquat in Neuro-2a cells).  
**560** // N // 3β-hydroxy-deoxyisoaustamide // IA vs 2 nHCLs; no neuroprotective activ. (paraquat in Neuro-2a cells).
- 211** Ascomycota *Penicillium glabrum* // (soft coral, *Scleronephthya* sp.) Xieyang Island, Beibu Gulf, China // Azaphilones and meroterpenoids from the soft coral-derived fungus *Penicillium glabrum* glmu003  
**561** // N // daldinin G // IA vs 4 microb, strains; IA vs AChE; IA vs pancreatic lipase.  
**562** // N // daldinin H // IA vs 4 microb, strains; IA vs AChE; IA vs pancreatic lipase.
- 212** Ascomycota *Penicillium oxalicum* // (sediment) unspecified location // Phenylhydrazones and quinazoline derivatives from the cold-seep-derived fungus *Penicillium oxalicum*  
**563** // N // penoxahydrazone A // mod. to pot. inhib. vs 3 phytoplankton; IA to weak inhib. vs 4 microb. strains; IA vs brine shrimp.  
**564** // N // penoxahydrazone B // Tested as mixture with **565** IA to mod. inhib. vs 3 phytoplankton; IA to weak inhib. vs 4 microb. strains; IA vs brine shrimp.  
**565** // N // penoxahydrazone C // Tested as mixture with **564** IA to mod. inhib. vs 3 phytoplankton; IA to weak inhib. vs 4 microb. strains; IA vs brine shrimp.  
**566** // N // penoxazolone A // weak to pot. inhib. vs 3 phytoplankton; weak inhib. vs 4 microb. strains; IA vs brine shrimp.  
**567** // N // penoxazolone B // weak to mod. inhib. vs 3 phytoplankton; IA to weak inhib. vs 4 microb. strains; IA vs brine shrimp.

## 2 Marine microorganisms and phytoplankton:

## 2.3 Marine-sourced fungi (excluding from mangroves)

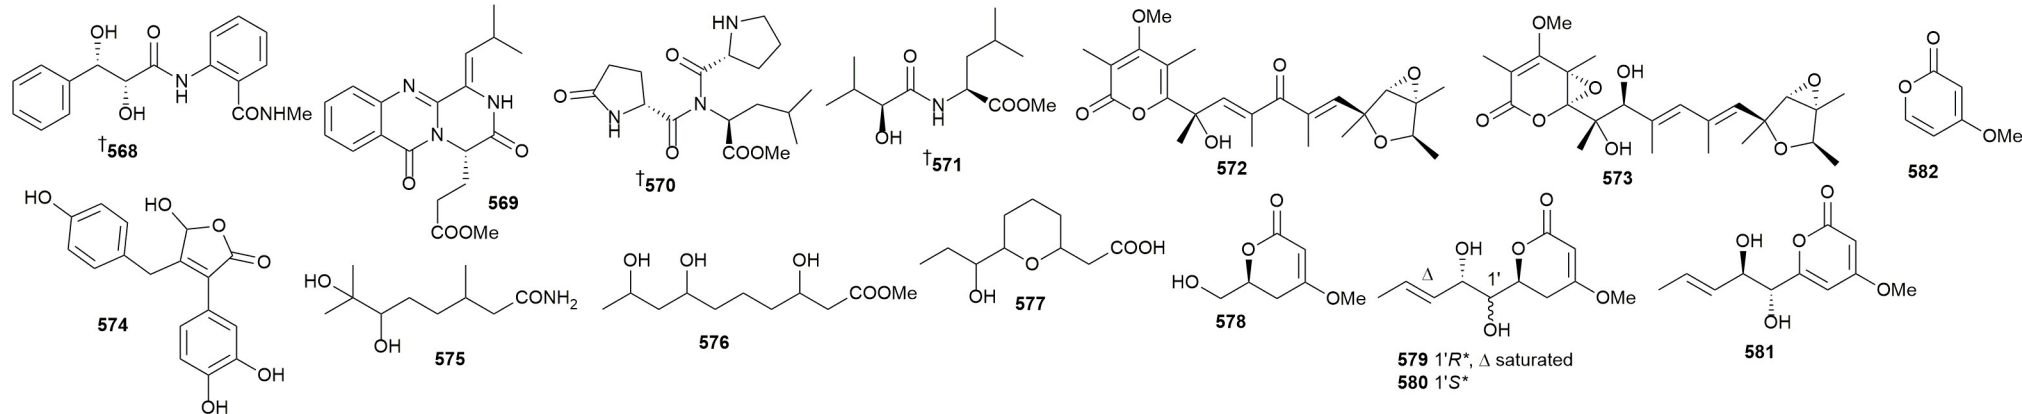

- 213** Ascomycota *Penicillium griseofulvum* // (sediment) Indian Ocean // Anti-food allergic compounds from *Penicillium griseofulvum* MCCC 3A00225, a deep-sea-derived fungus  
**568** // N // penigrisamide // IA vs anti-allergy effect (RBL-2H3 cells).  
**569** // N // aurantiomate C // IA vs anti-allergy effect (RBL-2H3 cells).  
**570** // N // *N,N*-pyroglutamylleucinmethyl ester // IA vs anti-allergy effect (RBL-2H3 cells).  
**571** // N // methyl-2-hydroxy-3-methylbutanoyl-L-leucinate // IA vs anti-allergy effect (RBL-2H3 cells).  
**572** // N // verrucosidinol A // IA vs anti-allergy effect (RBL-2H3 cells).  
**573** // N // verrucosidinol B // IA vs anti-allergy effect (RBL-2H3 cells).  
**574** // N // 8-hydroxyhelvafuranone // IA vs anti-allergy effect (RBL-2H3 cells).  
**575** // N // 6,7-dihydroxy-3,7-dimethyloctanamide // IA vs anti-allergy effect (RBL-2H3 cells).  
**576** // N // methyl-3,7,9-trihydroxydecanate // IA vs anti-allergy effect (RBL-2H3 cells).  
**577** // N // 9-hydroxy-3,7-epoxydecanoic acid //  
**214** Ascomycota *Penicillium restrictum* // (mussel, *Mytilus edulis*) Port Giraud, Loire estuary, France // Untargeted metabolomics approach for the discovery of environment-related pyran-2-ones chemodiversity in a marine-sourced *Penicillium restrictum*  
**578** // N // 5,6-dihydro-6*S*-hydroxymethyl-4-methoxy-2*H*-pyran-2-one // NT.  
**579** // N // (6*S*,1'*R*,2'*S*)-LL-P880β // IA vs 4 microb. strains.  
**580** // N // 5,6-dihydro-4-methoxy-6*S*-(1'*S*,2'*S*-dihydroxy pent-3'*E*-enyl)-2*H*-pyran-2-one // NT.  
**581** // N // 4-methoxy-6-(1'*R*, 2'*R*-dihydroxy pent-3'*E*-enyl)-2*H*-pyran-2-one // NT.  
**582** // M // 4-methoxy-2*H*-pyran-2-one // IA vs 4 microb. strains.

2 Marine microorganisms and phytoplankton:

2.3 Marine-sourced fungi (excluding from mangroves)

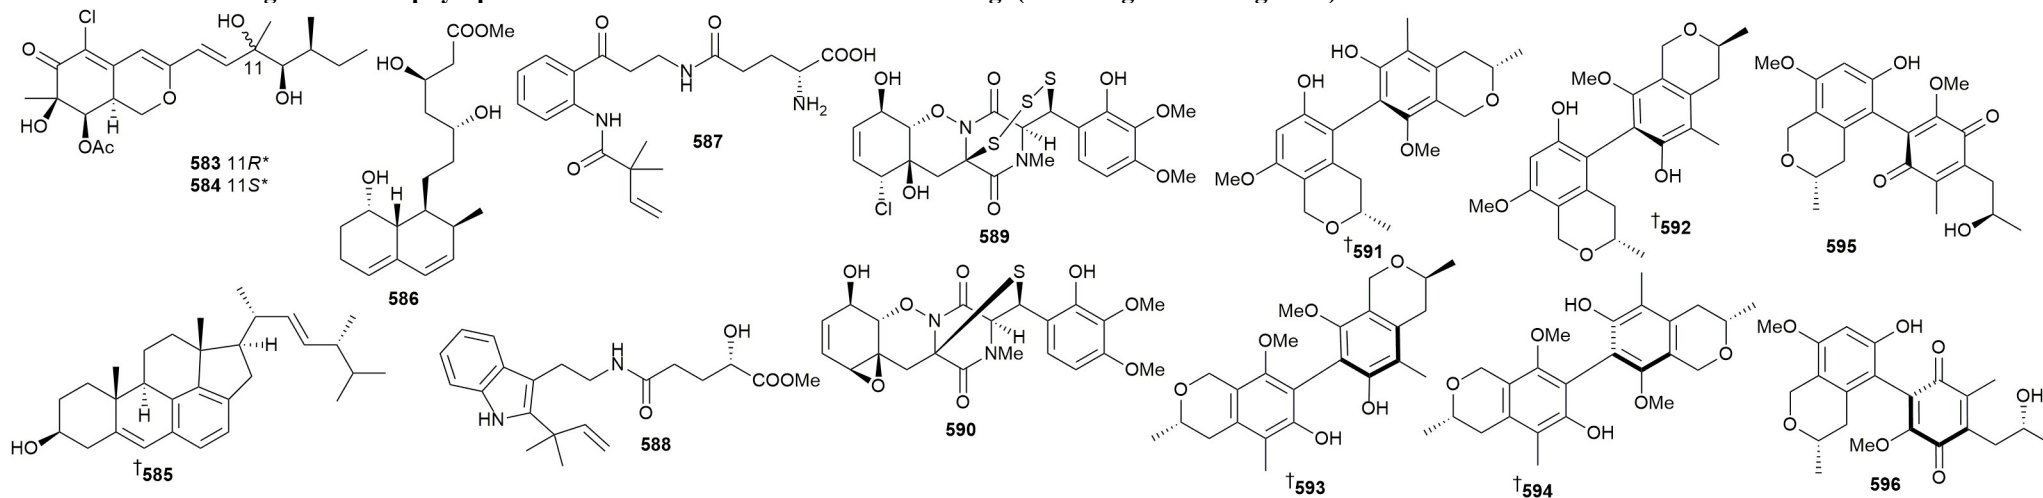

- 215** Ascomycota *Penicillium sclerotiorum* // (red alga, *Grateloupia* sp.) Yilan County, Taiwan // Anti-inflammatory azaphilones from the edible alga-derived fungus *Penicillium sclerotiorum*  
**583** // N // 8a-*epi*-hypocrellone A // IA vs 7 HTCLs and 1 nHCL; IA vs AI (NFκB); weak promotion of TGF-β.  
**584** // N // 8a-*epi*-eupenicilazaphilone C // IA vs 7 HTCLs and 1 nHCL; IA vs AI (NFκB); IA vs TGF-β.
- 216** Ascomycota *Penicillium solitum* // (sediment), Northwest Atlantic Ocean // Solitumergosterol A, a unique 6/6/6/6/5 steroid from the deep-sea-derived *Penicillium solitum* MCCC 3A00215  
**585** // N // solitumergosterol A // IA vs 17 HTCLs.
- 217** Ascomycota *Penicillium solitum* // (sediment) Northwest Atlantic Ocean // Chemical constituents of the deep-sea-derived *Penicillium solitum*  
**586** // N // 15-*O*-methyl ML-236A // IA vs 17 HTCLs; IA vs antiallergy effect (RBL-2H3 cells).  
**587** // N // (+)-solitumidine D // IA vs 17 HTCLs; IA vs antiallergy effect (RBL-2H3 cells).  
**588** // N // (±)-solitumidine E // IA vs 17 HTCLs; IA vs antiallergy effect (RBL-2H3 cells).
- 218** Ascomycota *Penicillium steckii*, Ascomycota *Penicillium citrinum* // (black band-diseased coral, *Pseudodiploria strigosa*) Looe Key reef, Florida, USA // Fungal epithiodiketopiperazines carrying α,β-polysulfide bridges from *Penicillium steckii* YE, and their chemical interconversion  
**589** // N // penigainamide A // NT due to instability.  
**590** // N // penigainamide B // NT due to instability.
- 219** Ascomycota *Penicillium steckii*, Ascomycota *Penicillium citrinum* // (sediment) Xiamen Sea, Fujian, China // Penicistekins A-F, isochroman-derived atropisomeric dimers from *Penicillium steckii* HNNU-5B18  
**591** // N // penicistekkin A // IA vs 6 microb. strains; IA vs 3 HTCLs.  
**592** // N // penicistekkin B // IA vs 6 microb. strains; IA vs 3 HTCLs.  
**593** // N // penicistekkin C // IA vs 6 microb. strains; IA vs 3 HTCLs.  
**594** // N // penicistekkin D // IA vs 6 microb. strains; IA vs 3 HTCLs.  
**595** // N // penicistekkin E // IA to weak inhib. vs 6 microb. strains; IA vs 3 HTCLs.  
**596** // N // penicistekkin F // IA to weak inhib. vs 6 microb. strains; IA vs 3 HTCLs.



2 Marine microorganisms and phytoplankton:

2.3 Marine-sourced fungi (excluding from mangroves)

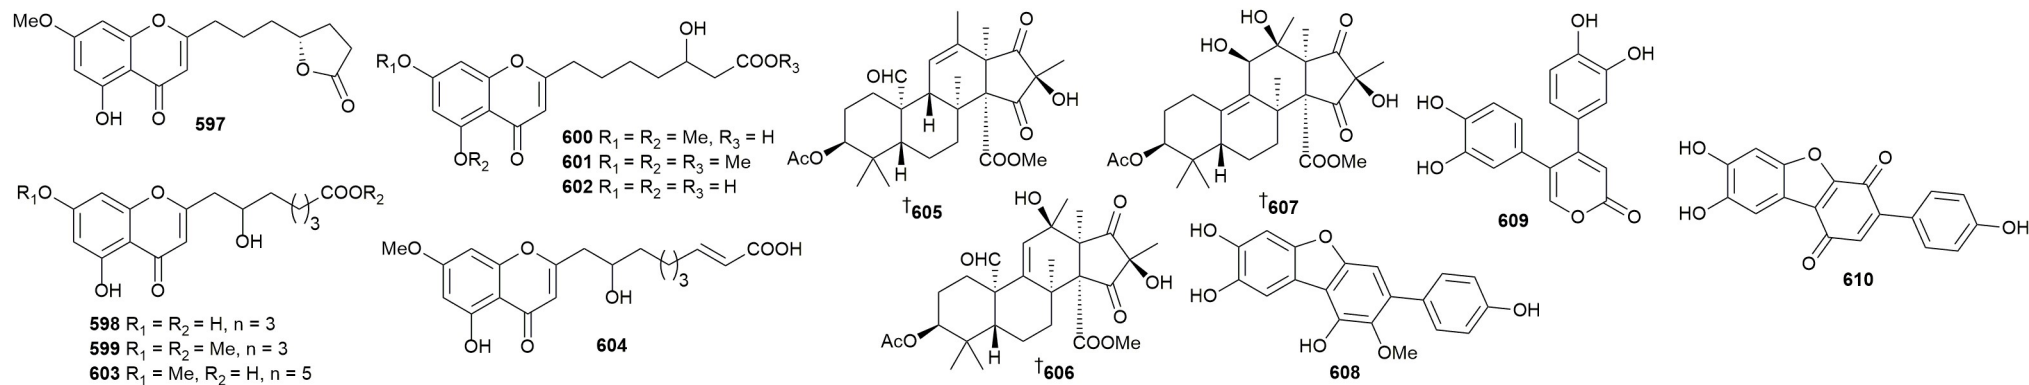

- 220 Ascomycota *Penicillium thomii* // (sediment) Yap Trench // Chromone derivatives with  $\alpha$ -glucosidase inhibitory activity from the marine fungus *Penicillium thomii* Maire  
 597 // N // penithochromone M // IA vs  $\alpha$ -glucosidase; IA vs antioxid. (DPPH).  
 598 // N // penithochromone N // IA vs  $\alpha$ -glucosidase; IA vs antioxid. (DPPH).  
 599 // N // penithochromone O // IA vs  $\alpha$ -glucosidase; IA vs antioxid. (DPPH).  
 600 // N // penithochromone P // IA vs  $\alpha$ -glucosidase; IA vs antioxid. (DPPH).  
 601 // N // penithochromone Q // IA vs  $\alpha$ -glucosidase; IA vs antioxid. (DPPH).  
 602 // N // penithochromone R // IA vs  $\alpha$ -glucosidase; IA vs antioxid. (DPPH).  
 603 // N // penithochromone S // IA vs  $\alpha$ -glucosidase; IA vs antioxid. (DPPH).  
 604 // N // penithochromone T // IA vs  $\alpha$ -glucosidase; IA vs antioxid. (DPPH).  
 221 Ascomycota *Penicillium* sp // (sediment) East Pacific Ocean // New andrastin-type meroterpenoids from the marine-derived fungus *Penicillium* sp.  
 605 // N // penimeroterpenoid A // IA vs 6 HTCLs.  
 606 // N // penimeroterpenoid B // IA vs 6 HTCLs.  
 607 // N // penimeroterpenoid C // IA vs 6 HTCLs.  
 222 Ascomycota *Penicillium* sp // (sediment) South China Sea // p-Terphenyls as anti-HSV-1/2 agents from a deep-sea-derived *Penicillium* sp.  
 608 // N // peniterphenyl A // weak inhib. vs 2 viruses.  
 609 // N // peniterphenyl B // weak inhib. vs 2 viruses.  
 610 // N // peniterphenyl C // IA vs 2 viruses.

## 2 Marine microorganisms and phytoplankton:

## 2.3 Marine-sourced fungi (excluding from mangroves)

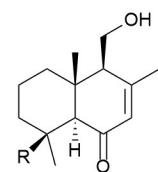

†611 R = CH<sub>2</sub>OH  
612 R = COOH

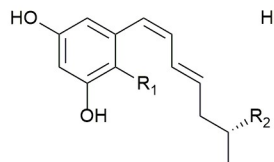

613 R<sub>1</sub> = H, R<sub>2</sub> = OH  
614 R<sub>1</sub> = COOH, R<sub>2</sub> = OH  
615 R<sub>1</sub> = COOH, R<sub>2</sub> = H

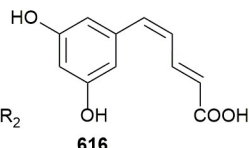

616

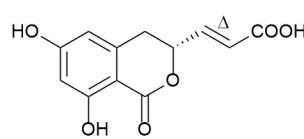

617

†618 Δ saturated

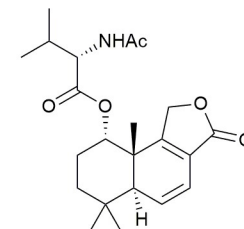

619

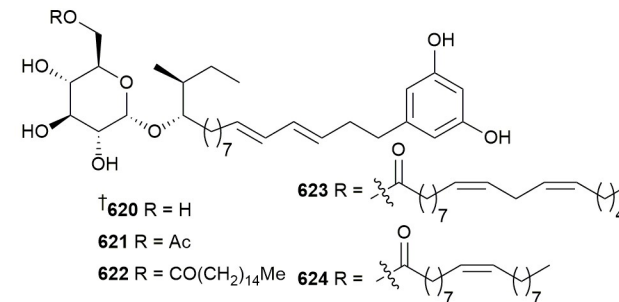

†620 R = H

621 R = Ac

622 R = CO(CH<sub>2</sub>)<sub>14</sub>Me

623 R =

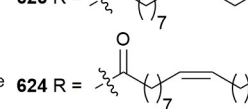

624 R =

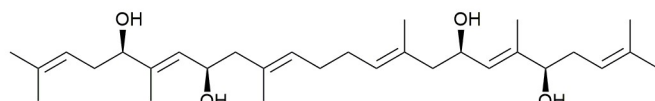

†625

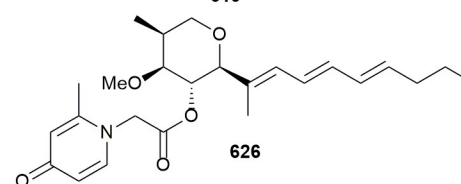

626

- 223** Ascomycota *Penicillium* sp // (hydrothermal vent sediment) Kueishantao, Taiwan // New drimane sesquiterpenes and polyketides from marine-derived fungus *Penicillium* sp. TW58-16 and their anti-inflammatory and  $\alpha$ -glucosidase inhibitory effects  
**611** // N // (4*S*,5*R*,9*S*,10*R*)-11,13-dihydroxy-drim-7-en-6-one // IA vs  $\alpha$ -glucosidase; IA vs NO prod; IA vs COX-2.  
**612** // N // (4*S*,5*R*,9*S*,10*R*)-11-hydroxy-13-carboxy-drim-7-en-6-one // IA vs  $\alpha$ -glucosidase; IA vs NO prod; IA vs COX-2.  
**613** // N // 5-((*R*,1*Z*,3*E*)-6-hydroxy-1,3-heptadien-1-yl)-1,3-benzenediol // IA vs  $\alpha$ -glucosidase; IA vs NO prod; IA vs COX-2.  
**614** // N // 4-carboxy-5-((*R*,1*Z*,3*E*)-6-hydroxy-1,3-heptadien-1-yl)-1,3-benzenediol // IA vs  $\alpha$ -glucosidase; IA vs NO prod; IA vs COX-2.  
**615** // N // 4-carboxy-5-((1*Z*,3*E*)-1,3-heptadien-1-yl)-1,3-benzenediol // IA vs  $\alpha$ -glucosidase; IA vs NO prod; IA vs COX-2.  
**616** // N // 5-((1*Z*,3*E*)-4-carboxy-1,3-butadienyl-1-yl)-1,3-benzenediol // weak inhib. vs  $\alpha$ -glucosidase; IA vs NO prod; IA vs COX-2.  
**617** // N // (2*E*)-3-[(3*R*)-3,4-dihydro-6,8-dihydroxy-1-oxo-1*H*-2-benzopyran-3-yl]-2-propenoic acid // IA vs  $\alpha$ -glucosidase; IA vs NO prod; IA vs COX-2.  
**618** // N // 3-[(3*S*)-3,4-dihydro-6,8-dihydroxy-1-oxo-1*H*-2-benzopyran-3-yl]-propanoic acid // weak inhib. vs  $\alpha$ -glucosidase; IA vs NO prod; IA vs COX-2.
- 224** Ascomycota *Penicillium* sp // (sediment) Sindh, Karachi, Pakistan // Isolation, structural elucidation, and antimicrobial evaluation of the metabolites from a marine-derived fungus *Penicillium* sp. ZZ1283  
**619** // N // purpuride D // mod. inhib. vs 2 microb. strains; weak inhib. vs 1 fungus.
- 225** Ascomycota *Penicillium* sp // (sediment) Arabian Sea, Karachi, Sindh, Pakistan // New antiproliferative compounds against glioma cells from the marine-sourced fungus *Penicillium* sp. ZZ1750  
**620** // N // peniresorcinolide A // IA to weak cytotox. vs 2 HTCLs.  
**621** // N // peniresorcinolide B // weak cytotox. vs 2 HTCLs.  
**622** // N // peniresorcinolide C // IA vs 2 HTCLs.  
**623** // N // peniresorcinolide D // IA vs 2 HTCLs.  
**624** // N // peniresorcinolide E // IA vs 2 HTCLs.  
**625** // N // penidifarnesylin A // IA to weak cytotox. vs 2 HTCLs.  
**626** // N // penipyridinone A // IA vs 2 HTCLs.

2 Marine microorganisms and phytoplankton: 2.3 Marine-sourced fungi (excluding from mangroves)

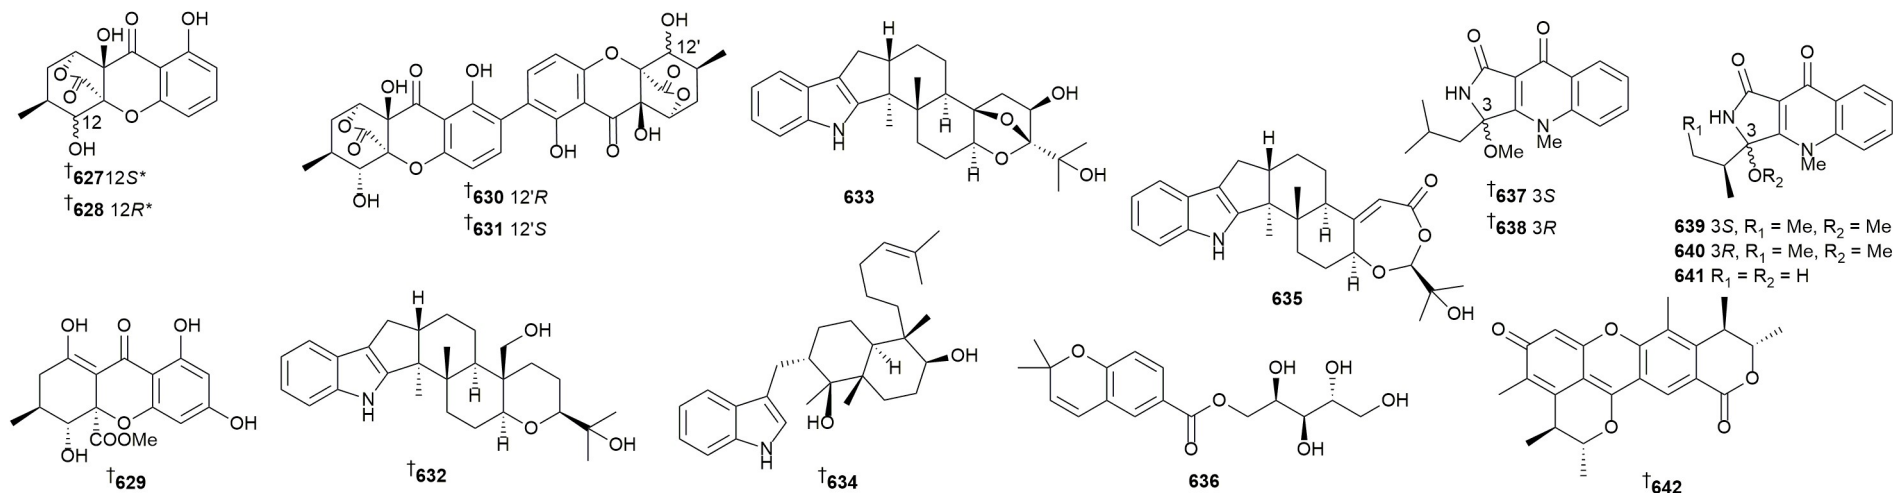

- 226** Ascomycota *Penicillium* sp // (sediment) Karachi, Pakistan // New polyhydroxanthones from the marine-associated fungus *Penicillium* sp. ZZ1750  
**627** // N // ergochrome C // weak activ. vs 2 microb. strains; weak activ. vs 1 fungus; IA vs 2 HTCLs.  
**628** // N // ergochrome D // weak activ. vs 2 microb. strains; weak activ. vs 1 fungus; IA vs 2 HTCLs.  
**629** // N // ergochrome E // IA to weak activ. vs 2 microb. strains; weak activ. vs 1 fungus; IA vs 2 HTCLs.  
**630** // N // ergochrome F // IA to weak activ. vs 2 microb. strains; weak activ. vs 1 fungus; IA vs 2 HTCLs.  
**631** // N // ergochrome G // IA vs 2 microb. strains; IA vs 1 fungus; IA vs 2 HTCLs.
- 227** Ascomycota *Penicillium* sp // (bivalve mollusc, *Meretrix lusoria*) Haikou Bay, Hainan province, China // Cytotoxic indole-diterpenoids from the marine-derived fungus *Penicillium* sp. KFD28  
**632** // N // penerpene K // IA vs 3 HTCLs; IA vs 4 microb. strains.  
**633** // N // penerpene L // IA vs 3 HTCLs; IA vs 4 microb. strains.  
**634** // N // penerpene M // IA vs 3 HTCLs; IA vs 4 microb. strains.  
**635** // N // penerpene N // IA vs 3 HTCLs; IA vs 4 microb. strains.
- 228** Ascomycota *Penicillium* sp // (seawater) West Pacific Ocean // Chemical constituents of the marine fungus *Penicillium* sp. MCCC 3A00228  
**636** // N // D-arabinitol-anofinicate // IA vs 11 HTCLs; IA vs inhib. transcription factors Nur77 and Retinoid X Receptor Alpha
- 229** Ascomycota *Penicillium* sp // (unspecified/unidentified sponge) Beibu Gulf, Beihai, Guangxi Province, China. // New *N*-methyl-4-quinolone alkaloid and citrinin dimer derivatives from the sponge-derived fungus *Penicillium* sp. SCSIO 41303  
**637** // N // quinolactacin E1 // IA vs 6 microb. strains; IA vs AChE; IA vs pancreatic lipase; NT vs 2 HTCLs; NT vs 2 viruses.  
**638** // N // quinolactacin E2 // IA vs 6 microb. strains; IA vs AChE; IA vs pancreatic lipase; NT vs 2 HTCLs; NT vs 2 viruses.  
**639** // N // quinolactacin F1 // IA vs 6 microb. strains; IA vs AChE; weak inhib. pancreatic lipase; IA vs 2 HTCLs; IA vs 2 viruses.  
**640** // N // quinolactacin F2 // IA vs 6 microb. strains; IA vs AChE; IA vs pancreatic lipase; IA vs 2 HTCLs; IA vs 2 viruses.  
**641** // N // quinolactacin G // IA vs 6 microb. strains; NT vs AChE; NT vs pancreatic lipase; IA vs 2 HTCLs; IA vs 2 viruses.  
**642** // N // dicitrinol D // IA vs 6 microb. strains; IA vs AChE; IA vs pancreatic lipase; IA vs 2 HTCLs; IA vs 2 viruses.

2 Marine microorganisms and phytoplankton:

2.3 Marine-sourced fungi (excluding from mangroves)

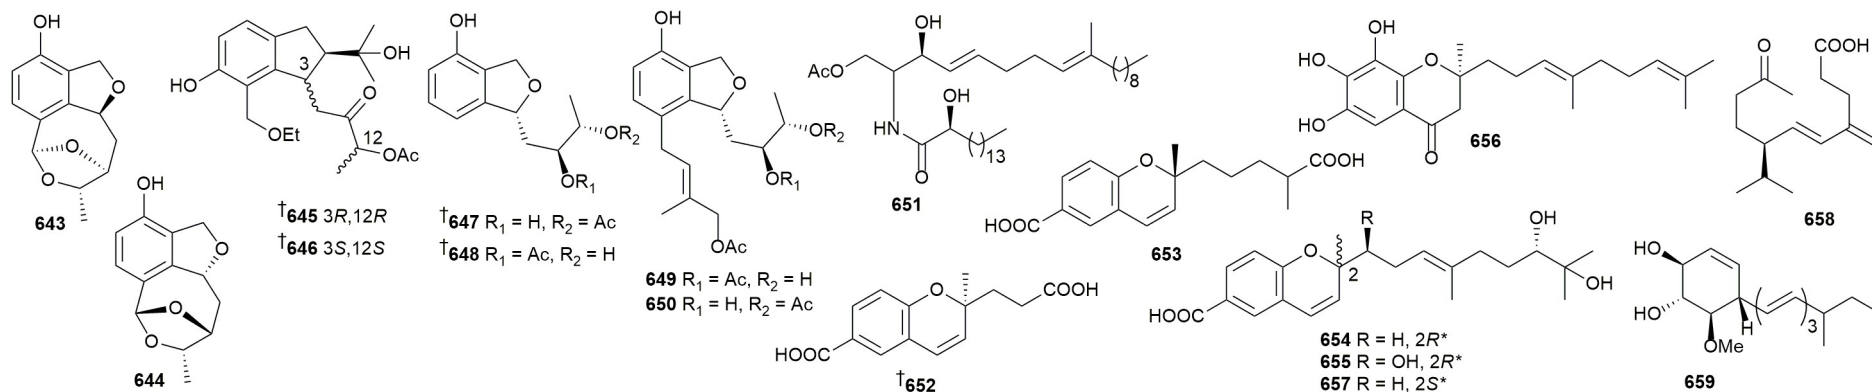

- 230 Ascomycota *Pestalotiopsis heterocornis* // (sponge, *Phakellia fusca*) Xisha Islands, China // Heterocornols from the sponge-derived fungus *Pestalotiopsis heterocornis* with anti-inflammatory activity  
 643 // N // heterocornol Q // IA vs 4 HTCLS; IA vs 3 microb. strains and vs 1 fungus; IA vs NO prod.  
 644 // N // heterocornol R // IA vs 4 HTCLS; IA vs 3 microb. strains and vs 1 fungus; IA vs NO prod.  
 645 // N // heterocornol S // IA vs 4 HTCLS; IA vs 3 microb. strains and vs 1 fungus; IA vs NO prod.  
 646 // N // heterocornol T // IA vs 4 HTCLS; IA vs 3 microb. strains and vs 1 fungus; IA vs NO prod.  
 647 // N // heterocornol U // IA vs 4 HTCLS; IA vs 3 microb. strains and vs 1 fungus; IA vs NO prod.  
 648 // N // heterocornol V // IA vs 4 HTCLS; IA vs 3 microb. strains and vs 1 fungus; IA vs NO prod.  
 649 // N // heterocornol W // IA vs 4 HTCLS; IA vs 3 microb. strains and vs 1 fungus; IA vs NO prod.  
 650 // N // heterocornol X // IA vs 4 HTCLS; IA vs 3 microb. strains and vs 1 fungus; IA vs NO prod.  
 651 // N // (2S, 2'R, 3R, 4E, 8E)-N-2'-hydroxyhexadecanoyl-2-amino-9-methyl-4, 8-octadecadiene-yl acetate // IA vs 4 HTCLS; IA vs 3 microb. strains and vs 1 fungus; IA vs NO prod.
- 231 Ascomycota *Pestalotiopsis neglecta* // (red alga, *Coelarthrum* sp.) Yongxing Island, South China Sea // Chromene and chromone derivatives as liver X receptors modulators from a marine-derived *Pestalotiopsis neglecta* fungus  
 652 // N // pestalotiochromenoic acid A // no up or downregulation of LXRA, LXRb or ABCA1 genes; IA vs 7 HTCLS.  
 653 // N // pestalotiochromenoic acid B // no up or downregulation of LXRA, LXRb; mod. upregulation of ABCA1; IA vs 7 HTCLS.  
 654 // N // pestalotiochromenoic acid C // no up or downregulation of LXRA, LXRb or ABCA1; IA vs 7 HTCLS.  
 655 // N // pestalotiochromenoic acid D // no up or downregulation of LXRA, LXRb; mod. upregulation of ABCA1; IA vs 7 HTCLS.  
 656 // N // pestalotiochromone A // Some affinity with LXRA; no upregulation of LXRb; mod. upregulation of ABCA1; IA vs 7 HTCLS.  
 657 // N // pestalotiochromone B // IA vs 7 HTCLS; NT for LXR activity.
- 232 Ascomycota *Phaeosphaeria spartinae* // (red alga, *Ceramium* sp.) unspecified location // Secondary metabolites from the marine-derived fungus *Phaeosphaeria spartinae*  
 658 // N // (-)-tricinonic acid // NT.  
 659 // N // spartinol E // NT.

2 Marine microorganisms and phytoplankton: 2.3 Marine-sourced fungi (excluding from mangroves)

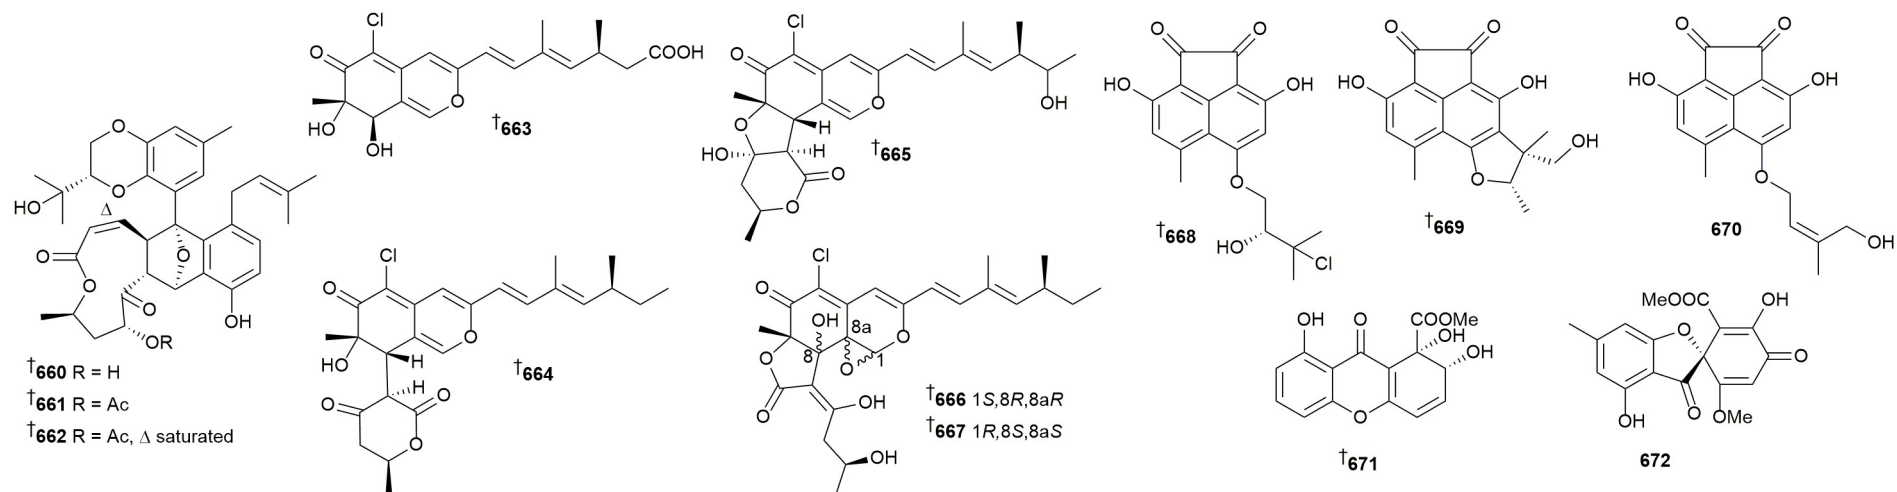

- 233** Ascomycota *Phomopsis* sp // (sediment) Indian Ocean // Lithocarpins E—G, potent anti-tumor tenellone-macrolides from the deep-sea fungus *Phomopsis lithocarpus* FS508  
 660 // N // lithocarpin E // IA to weak cytotox. vs 4 HTCLs.  
 661 // N // lithocarpin F // IA vs 4 HTCLs.  
 662 // N // lithocarpin G // IA vs 4 HTCLs.
- 234** Ascomycota *Phomopsis tersa*, Ascomycota *Diaporthe tersa* // (sediment) Indian Ocean // Tersaphilones A-E, cytotoxic chlorinated azaphilones from the deep-sea-derived fungus *Phomopsis tersa* FS441  
 663 // N // tersaphilone A // IA vs 4 HTCLs.  
 664 // N // tersaphilone B // IA vs 4 HTCLs.  
 665 // N // tersaphilone C // IA vs 4 HTCLs.  
 666 // N // tersaphilone D // IA to weak activ. vs 4 HTCLs.  
 667 // N // tersaphilone E // weak activ. vs 4 HTCLs.
- 235** Ascomycota // (sediment) Fildes Peninsula // Antibacterial phenalenone derivatives from marine-derived fungus Pleosporales sp. HDN1811400  
 668 // N // peniciphenalenin G // IA vs 8 microb. strains; IA vs 5 HTCLs.  
 669 // N // peniciphenalenin H // IA to weak activ. vs 8 microb. strains; IA vs 5 HTCLs.  
 670 // N // peniciphenalenin I // IA to weak activ. vs 8 microb. strains; IA vs 5 HTCLs.
- 236** Ascomycota // (sponge, "Chalinidae family") Apo Island, Negros Oriental, Philippines // Cytotoxic polyketide metabolites from a marine mesophotic zone Chalinidae sponge-associated fungus Pleosporales sp. NBUF144  
 671 // N // globosuxanthone F // mod. cytotox. vs 1 HTCL.  
 672 // N // 2'-hydroxy bisdechlorogodin // IA vs 1 HTCL.

2 Marine microorganisms and phytoplankton: 2.3 Marine-sourced fungi (excluding from mangroves)

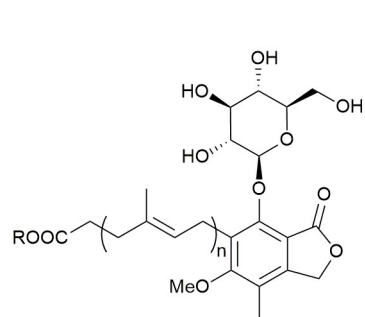

673 R = H, n = 1  
674 R = H, n = 2  
675 R = Me, n = 1

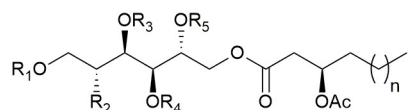

676 R<sub>1</sub> = R<sub>4</sub> = R<sub>5</sub> = Ac, R<sub>2</sub> = OH, R<sub>3</sub> = H, n = 11  
677 R<sub>1</sub> = R<sub>4</sub> = R<sub>5</sub> = H, R<sub>2</sub> = OH, R<sub>3</sub> = Ac, n = 11  
678 R<sub>1</sub> = R<sub>3</sub> = R<sub>4</sub> = Ac, R<sub>2</sub> = OAc, R<sub>5</sub> = H, n = 13  
679 R<sub>1</sub> = R<sub>3</sub> = R<sub>4</sub> = R<sub>5</sub> = Ac, R<sub>2</sub> = H, n = 13

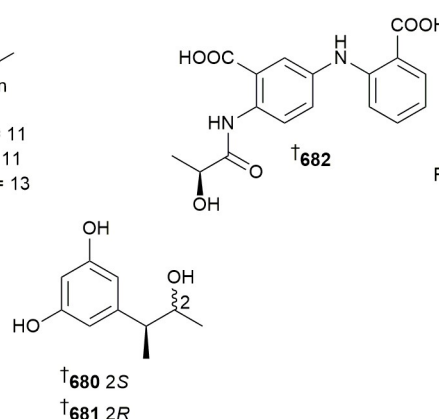

†680 2S  
†681 2R

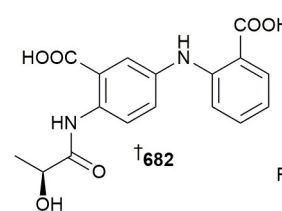

†682

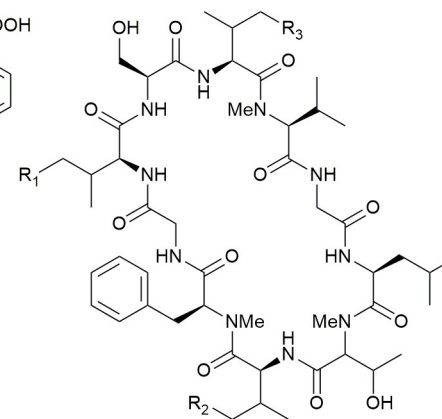

683 R<sub>1</sub> = Me, R<sub>2</sub> = R<sub>3</sub> = H  
684 R<sub>1</sub> = R<sub>2</sub> = R<sub>3</sub> = H  
685 R<sub>1</sub> = R<sub>2</sub> = Me, R<sub>3</sub> = H  
686 R<sub>1</sub> = R<sub>2</sub> = R<sub>3</sub> = Me

- 237 Zygomycota *Rhizopus oryzae*, Zygomycota *Rhizopus arrhizus* // (sponge, *Dendrectilla tremitensis*) K m r Limani coastline, Turkey // Penicacids H–J, three new mycopenolic acid derivatives from the marine-derived fungus *Rhizopus oryzae*  
673 // M // penicacid H // IA vs 4 microb. strains.  
674 // N // penicacid I // IA vs 4 microb. strains.  
675 // N // penicacid J // IA vs 4 microb. strains.
- 238 Basidiomycota *Rhodotorula mucilaginosa* // (sediment) Mid-Atlantic Ridge // Genomics- and metabolomics-based investigation of the deep-sea sediment-derived yeast, *Rhodotorula mucilaginosa* 50-3-19/20B  
676 // N // D-mannitol-2,3,6-triacetyloxy-(*R*)-3'-acetyloxyhexadecanoate // IA vs 1 HTCL and vs 1 nHCL.  
677 // N // D-mannitol-4-monoacetyloxy-(*R*)-3'-acetyloxyhexadecanoate // IA vs 1 HTCL and vs 1 nHCL.  
678 // N // D-mannitol-tetraacetyloxy-(*R*)-3'-acetyloxyoctadecanoate // IA vs 1 HTCL and vs 1 nHCL.  
679 // N // D-arabitol-2,3,4,5-tetraacetyloxy-(*R*)-3'-acetyloxyoctadecanoate // IA vs 1 HTCL and vs 1 nHCL.
- 239 Ascomycota *Roussoella siamensis* // Mirs Bay, Shenzhen, Guangdong Province, China // Roussoelins A and B: two phenols with antioxidant capacity from ascidian-derived fungus *Roussoella siamensis* SYSU-MS4723  
680 // N // roussoelin A // IA vs 3 HTCLs; IA vs NO prod.  
681 // N // roussoelin B // IA vs 3 HTCLs; IA vs NO prod.
- 240 Ascomycota *Scedosporium apiospermum* // (soft coral, *Lobophyton crassum*) Hainan Sanya National Coral Reef Reserve, China // Biotransformations of anthranilic acid and phthalimide to potent antihyperlipidemic alkaloids by the marine-derived fungus *Scedosporium apiospermum* F41-1  
682 // N // scediphenylamine A // IA vs 1 nHCL.
- 241 Ascomycota *Sesquicillium microsporum*, Ascomycota *Tolypocladium microsporum* // (sediment) Frobisher Bay, Nunavut, Canada // Auyuittuqamides A–D, cyclic decapeptides from *Sesquicillium microsporum* RKAG 186 isolated from Frobisher Bay sediment  
683 // N // auyuittuqamide A // IA vs 2 HTCLs and vs 1 nHCL; IA vs 4 microb. strains; IA vs 1 fungus.  
684 // N // auyuittuqamide B // IA vs 2 HTCLs and vs 1 nHCL; IA vs 4 microb. strains; IA vs 1 fungus.  
685 // N // auyuittuqamide C // IA vs 2 HTCLs and vs 1 nHCL; IA vs 4 microb. strains; IA vs 1 fungus.  
686 // N // auyuittuqamide D // IA vs 2 HTCLs and vs 1 nHCL; IA vs 4 microb. strains; IA vs 1 fungus.

2 Marine microorganisms and phytoplankton:

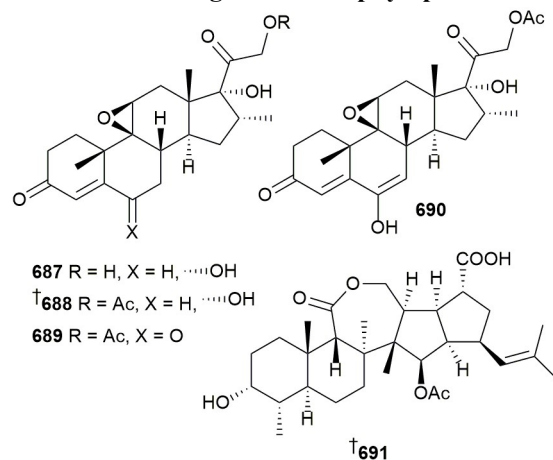

2.3 Marine-sourced fungi (excluding from mangroves)

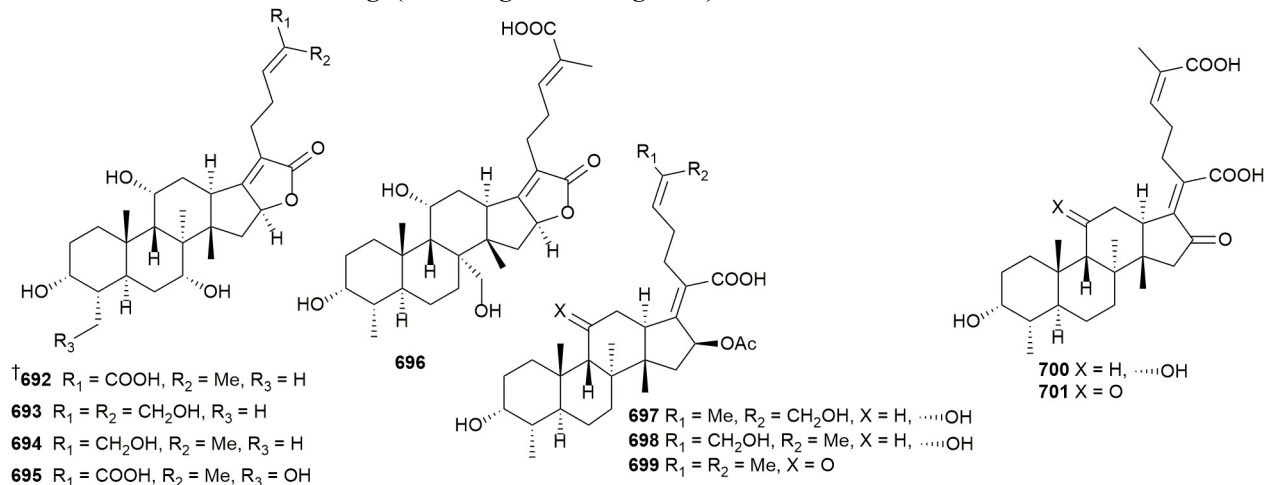

242 Ascomycota *Simplicillium lanosoniveum* // (soft coral, *Simularia* sp.) Yongxing Island, South China Sea // Arthriniosteroids A-D, four new steroids from the soft coral-derived fungus *Simplicillium lanosoniveum* SCSIO41212

687 // N // arthriniosteroid A // IA vs NO prod; IA vs 4 microb. strains; IA vs AChE.

688 // N // arthriniosteroid B // IA vs NO prod; IA vs 4 microb. strains; IA vs AChE.

689 // N // arthriniosteroid C // IA vs NO prod; IA vs 4 microb. strains; IA vs AChE.

690 // N // arthriniosteroid D // IA vs NO prod; IA vs 4 microb. strains; IA vs AChE.

243 Ascomycota *Simplicillium* sp // (unspecified/unidentified soft coral) Spratly Islands, South China Sea // Fusidane-type antibiotics from the marine-derived fungus *Simplicillium* sp. SCSIO 41513

691 // N // simplifusidic acid A // NT.

692 // N // simplifusidic acid B // IA vs 1 microb. strain.

693 // N // simplifusidic acid C // NT.

694 // N // simplifusidic acid D // IA vs 1 microb. strain.

695 // N // simplifusidic acid E // IA vs 1 microb. strain.

696 // N // simplifusidic acid F // IA vs 1 microb. strain.

697 // N // simplifusidic acid G // NT.

698 // N // simplifusidic acid H // mod. inhib. vs 1 microb. strain.

699 // N // simplifusidic acid I // pot. inhib. vs 1 microb. strain.

700 // N // simplifusidic acid J // NT.

701 // N // simplifusidic acid K // NT.

2 **Marine microorganisms and phytoplankton:** 2.3 **Marine-sourced fungi (excluding from mangroves)**

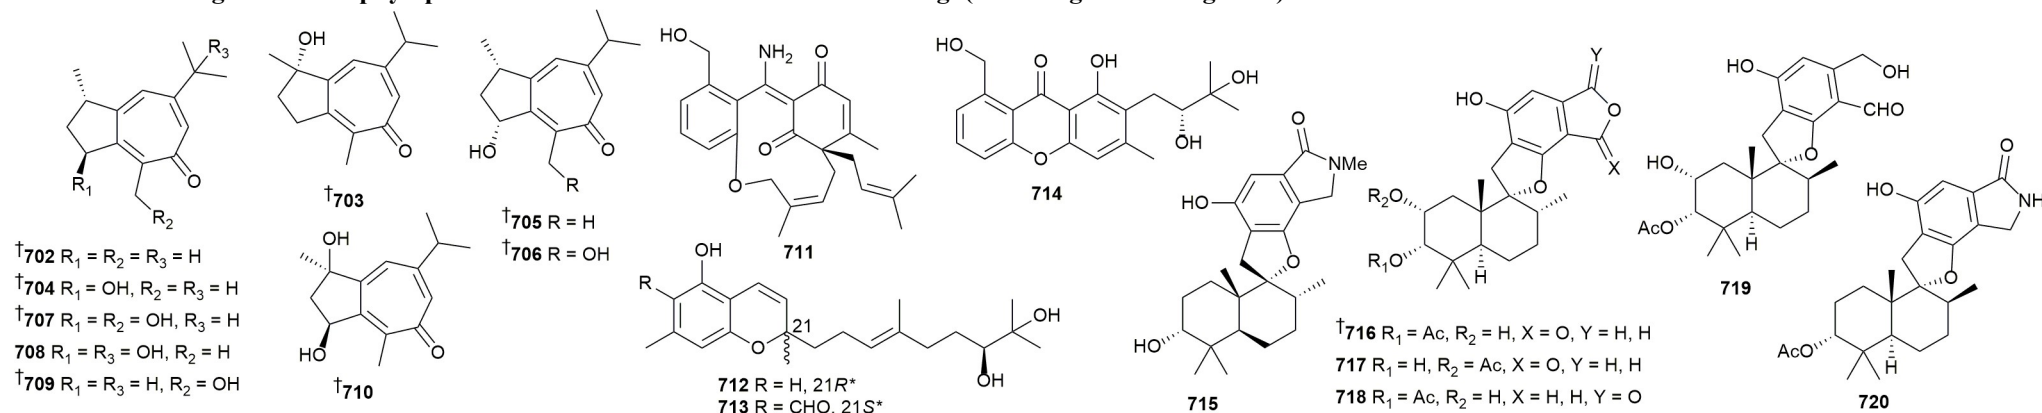

- 244 Ascomycota *Spiromastix* sp // (sediment) South Atlantic Ocean // Epigenetic manipulation to trigger production of guaiane-type sesquiterpenes from a marine-derived *Spiromastix* sp. fungus with antineuroinflammatory effects  
**702** // N // spiromaterpene A // IA vs NO prod.  
**703** // N // spiromaterpene B // IA vs NO prod.  
**704** // N // spiromaterpene C // IA vs NO prod.  
**705** // N // spiromaterpene D // IA vs NO prod.  
**706** // N // spiromaterpene E // weak inhib. vs NO prod.  
**707** // N // spiromaterpene F // IA vs NO prod.  
**708** // N // spiromaterpene G // IA vs NO prod.  
**709** // N // spiromaterpene H // IA vs NO prod.  
**710** // N // spiromaterpene I // IA vs NO prod.
- 245 Ascomycota *Stachybotrys chartarum* // Yongxing Island, South China Sea // Structurally diverse polyketides and phenylspirodrimanes from the soft coral-associated fungus *Stachybotrys chartarum* SCSIO41201  
**711** // N // arthroproliferin A // NT.  
**712** // N // arthroproliferin B // NT.  
**713** // N // arthroproliferin C // NT.  
**714** // N // arthroproliferin D // NT.  
**715** // N // arthroproliferin E // NT.
- 246 Ascomycota *Stachybotrys* sp // (gastropod mollusc, *Turbo chrysostomas*) South China Sea // Antibacterial phenylspirodrimanes from the marine-derived fungus *Stachybotrys* sp. SCSIO 40434  
**716** // N // stachybomycin A // IA vs 6 microb. strains.  
**717** // N // stachybomycin B // IA vs 6 microb. strains.  
**718** // N // stachybomycin C // IA vs 6 microb. strains.  
**719** // N // stachybomycin D // IA vs 6 microb. strains.  
**720** // N // stachybomycin E // IA to weak inhib. vs 6 microb. strains.





2 **Marine microorganisms and phytoplankton:** 2.3 **Marine-sourced fungi (excluding from mangroves)**

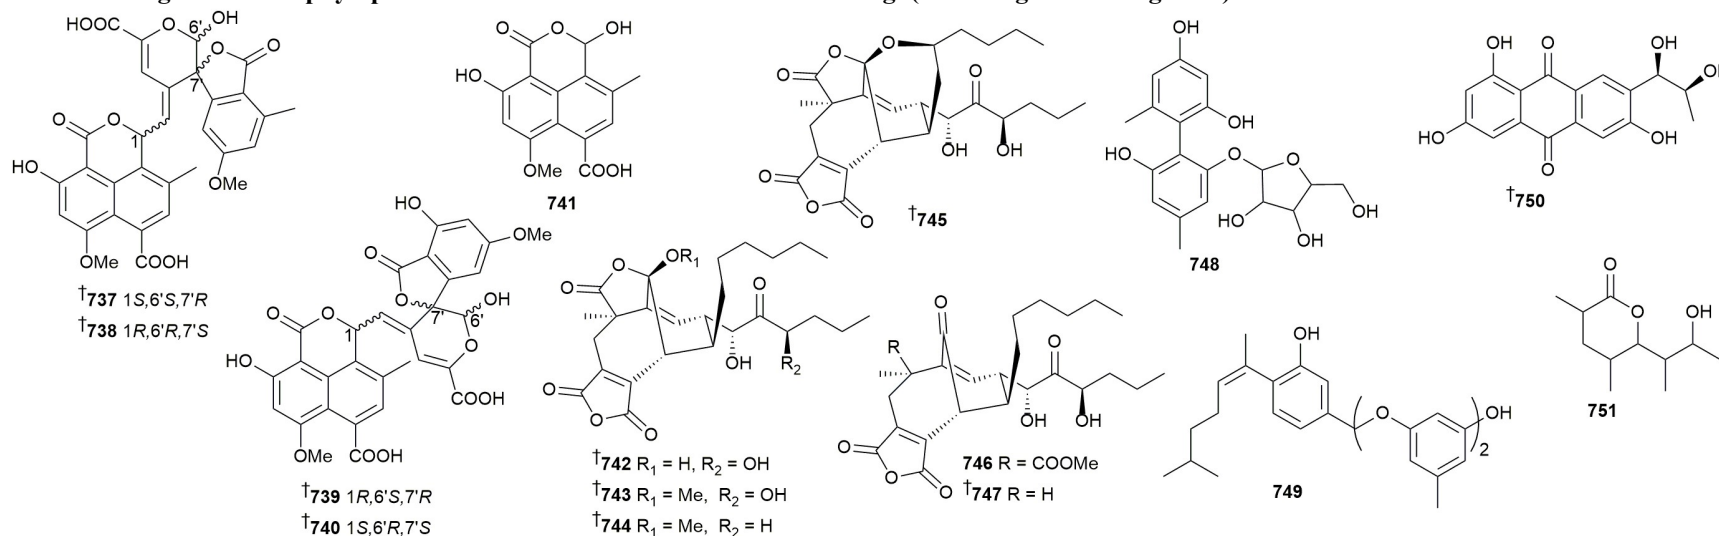

- 250 Ascomycota *Talaromyces purpureogenus* // (unspecified/unidentified soft coral) South China Sea // Talaromyxaones A and B: unusual oxaphenalenone spirolactones as phosphatase inhibitors from the marine-derived fungus *Talaromyces purpureogenus* SCSIO 41517  
**737** // N // (+)-talaromyxaone A // IA to mod. inhib. vs 7 PTPs; tested as a mixture with **738**.  
**738** // N // (-)-talaromyxaone A // IA to mod. inhib. vs 7 PTPs; tested as a mixture with **737**.  
**739** // N // (+)-talaromyxaone B // IA to mod. inhib. vs 7 PTPs; tested as a mixture with **741**.  
**740** // N // (-)-talaromyxaone B // IA to mod. inhib. vs 7 PTPs; tested as a mixture with **740**.  
**741** // N // 11-apopyrenulin // IA vs 7 PTPs.
- 251 Ascomycota *Talaromyces* sp // (unspecified/unidentified sponge) Weddell Sea, Antarctic // Talarodrides A-F, nonadrides from the Antarctic sponge-derived fungus *Talaromyces* sp. HDN1820200  
**742** // N // talarodride A // IA to weak inhib. vs 10 microb. strains; IA vs 16 HTCLs.  
**743** // N // talarodride B // IA to mod. inhib. vs 10 microb. strains; IA vs 16 HTCLs.  
**744** // N // talarodride C // IA vs 10 microb. strains; IA vs 16 HTCLs.  
**745** // N // talarodride D // IA vs 10 microb. strains; IA vs 16 HTCLs.  
**746** // N // talarodride E // IA vs 10 microb. strains; IA vs 16 HTCLs.  
**747** // N // talarodride F // IA vs 10 microb. strains; IA vs 16 HTCLs.
- 252 Ascomycota *Talaromyces* sp // (soft coral, *Sinularia* sp.) Yongxing Island, South China Sea // Two new bioactive polyphenols from the soft coral-derived fungus *Talaromyces* sp. SCSIO 041201  
**748** // N // talaversatili A // IA vs 4 microb. strains; no inhib. vs barnacle larvae settlement.  
**749** // N // talaversatili B // IA vs 4 microb. strains; no inhib. vs barnacle larvae settlement.
- 253 Ascomycota *Thermomyces lanuginosus* // (sediment) Co To archipelago, Vietnam // Polyketides from the marine sediment-derived fungus *Thermomyces lanuginosus* Tsikl. KMM 4681  
**750** // N // 1,3,6-trihydroxy-7-(1',2'-dihydroxypropan-2-yl)-anthraquinone // IA vs 2 HTCLs.  
**751** // N // 6-(3'-hydroxybutan-2'-yl)-3,5-dimethyltetrahydro-2H-pyran-2-one // IA vs 2 HTCLs.

**Key:** Main article bibliography reference // Taxonomy // Location // Article title  
 Compound number // Status // Compound name // Biological activity and Other information

## 2 Marine microorganisms and phytoplankton:

## 2.3 Marine-sourced fungi (excluding from mangroves)

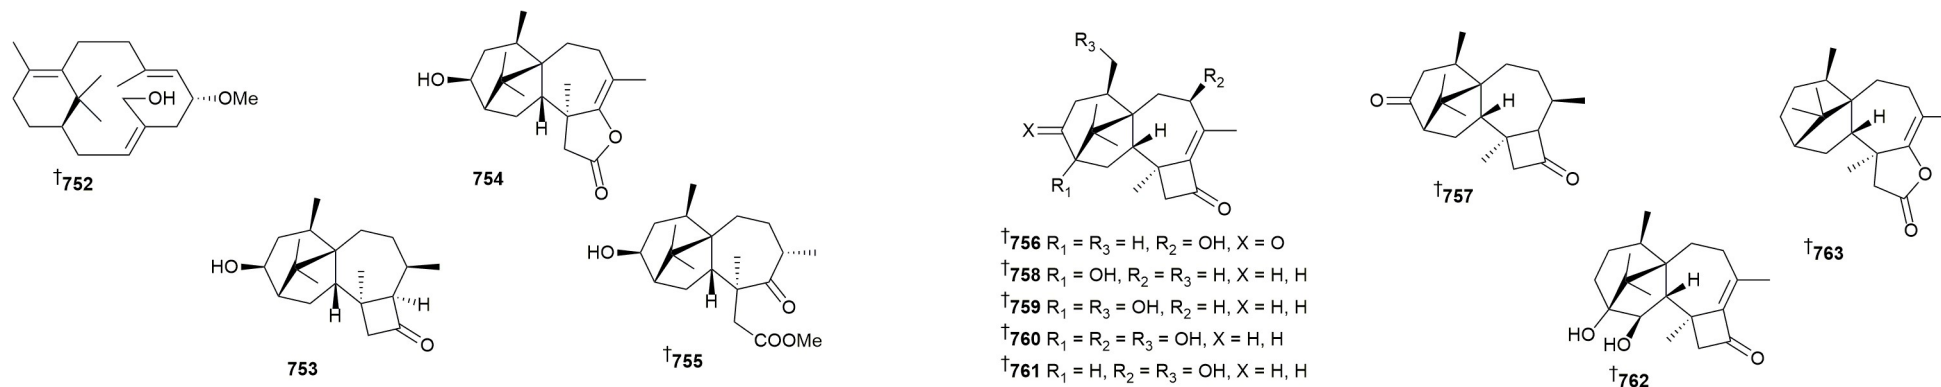

**254** Ascomycota *Trichoderma asperelloides* // (red alga, *Rhodomela confervoides*) Dalian, China // Proharziane and harziane derivatives from the marine algicolous fungus *Trichoderma asperelloides* RR-dl-6-11

**752** // N // 11*R*-methoxy-5,9,13-proharzitrin-19-ol // weak inhib. vs 4 phytoplankton.

**753** // N // 3*S*-hydroxy-9*R*,10*R*-dihydroharzianone // weak inhib. vs 4 phytoplankton.

**754** // N // 3*S*-hydroxytrichodermaerin // weak inhib. vs 4 phytoplankton.

**755** // N // methyl 3*S*-hydroxy-10,11-*seco*-harzianate // IA to weak inhib. vs 4 phytoplankton.

**255** Ascomycota *Trichoderma* sp // (sediment) South China Sea // Novel harziane diterpenes from deep-sea sediment fungus *Trichoderma* sp. SCSIW21 and their potential anti-inflammatory effects

**756** // N // harzianol K // IA vs 5 fungi; IA vs NO prod.

**757** // M // harzianol J // IA vs 5 fungi; IA vs NO prod.

**758** // M // harzianol A // IA vs 5 fungi; IA vs NO prod.

**759** // N // harzianol L // IA vs 5 fungi; IA vs NO prod.

**760** // N // harzianol M // IA vs 5 fungi; IA vs NO prod.

**761** // N // harzianol N // IA vs 5 fungi; IA vs NO prod.

**762** // N // harzianol O // IA vs 5 fungi; IA vs NO prod.

**256** Ascomycota *Trichoderma longibrachiatum* // (red alga, *Laurencia okamurai*) Weihai, China // Deoxytrichodermaerin, a harziane lactone from the marine algicolous fungus *Trichoderma longibrachiatum* A-WH-20-2

**763** // N // deoxytrichodermaerin // mod. to pot. inhib. vs 4 phytoplankton; IA vs 5 microb. strains; IA vs brine shrimp.

## 2 Marine microorganisms and phytoplankton:

## 2.3 Marine-sourced fungi (excluding from mangroves)

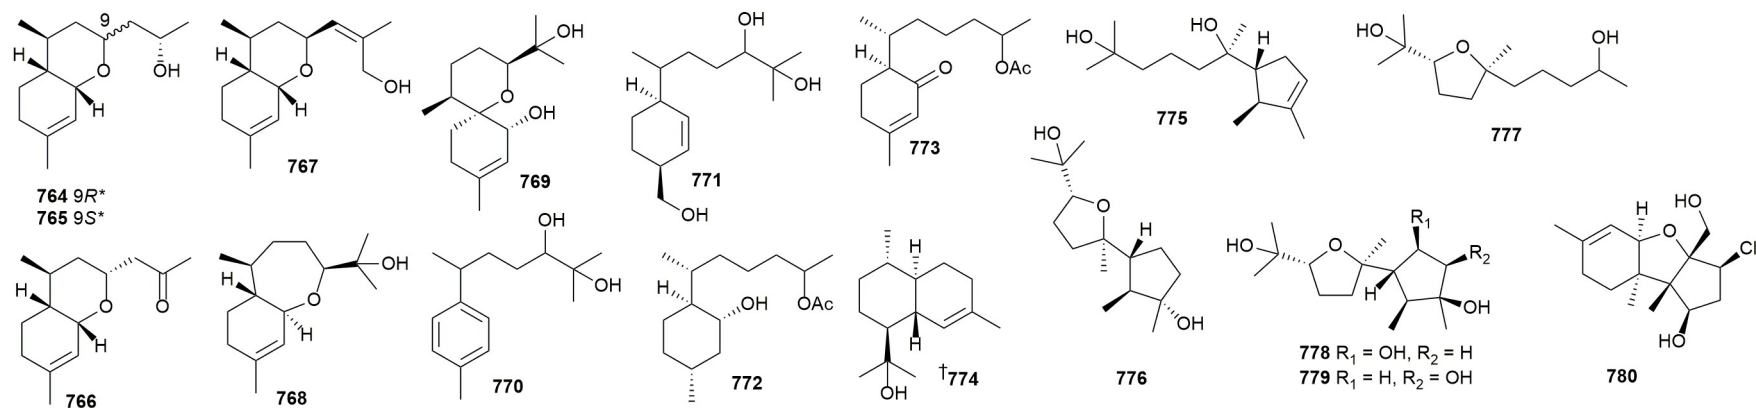

**257** Ascomycota *Trichoderma asperelloides* // (red alga, *Rhodomela confervoides*) Dalian, China // Bisabolane, cadinane, and cyclonerane sesquiterpenes from an algicolous strain of *Trichoderma asperelloides*

**764** // N // trichobisabolin Q // weak to pot. inhib. vs 4 phytoplankton.

**765** // N // trichobisabolin R // weak to pot. inhib. vs 4 phytoplankton.

**766** // N // trichobisabolin S // weak inhib. vs 4 phytoplankton.

**767** // N // trichobisabolin T // weak to mod. inhib. vs 4 phytoplankton.

**768** // N // trichobisabolin U // weak to mod. inhib. vs 4 phytoplankton.

**769** // N // trichobisabolin V // weak inhib. vs 4 phytoplankton.

**770** // N // trichobisabolin W // weak to mod. inhib. vs 4 phytoplankton.

**771** // N // trichobisabolin X // weak inhib. vs 4 phytoplankton.

**772** // N // trichobisabolin Y // weak to mod. inhib. vs 4 phytoplankton.

**773** // N // trichobisabolin Z // weak to mod. inhib. vs 4 phytoplankton.

**774** // N // cadin-4-en-11-ol // weak to pot. inhib. vs 4 phytoplankton.

**775** // N // cycloner-3-en-7,11-diol // weak to mod. inhib. vs 4 phytoplankton.

**776** // N // isoepicyclonerodiol oxide // weak to mod. inhib. vs 4 phytoplankton.

**777** // N // norepicyclonerodiol oxide // weak to mod. inhib. vs 4 phytoplankton.

**258** Ascomycota *Trichoderma hamatum* // (red alga, *Grateloupia* sp.) Zhoushan Islands // Three sesquiterpenes from the marine-alga-epiphytic fungus *Trichoderma hamatum* Z36-7

**778** // N // 5-hydroxyepicyclonerodiol oxide // weak inhib. vs 4 microb. strains; IA vs 3 phytoplankton.

**779** // N // 4-hydroxyepicyclonerodiol oxide // weak inhib. vs 4 microb. strains; IA to weak inhib. vs 3 phytoplankton.

**780** // N // trichodermol chlorohydrin // IA to weak inhib. vs 4 microb. strains; IA to weak inhib. vs 3 phytoplankton.

2 Marine microorganisms and phytoplankton: 2.3 Marine-sourced fungi (excluding from mangroves)

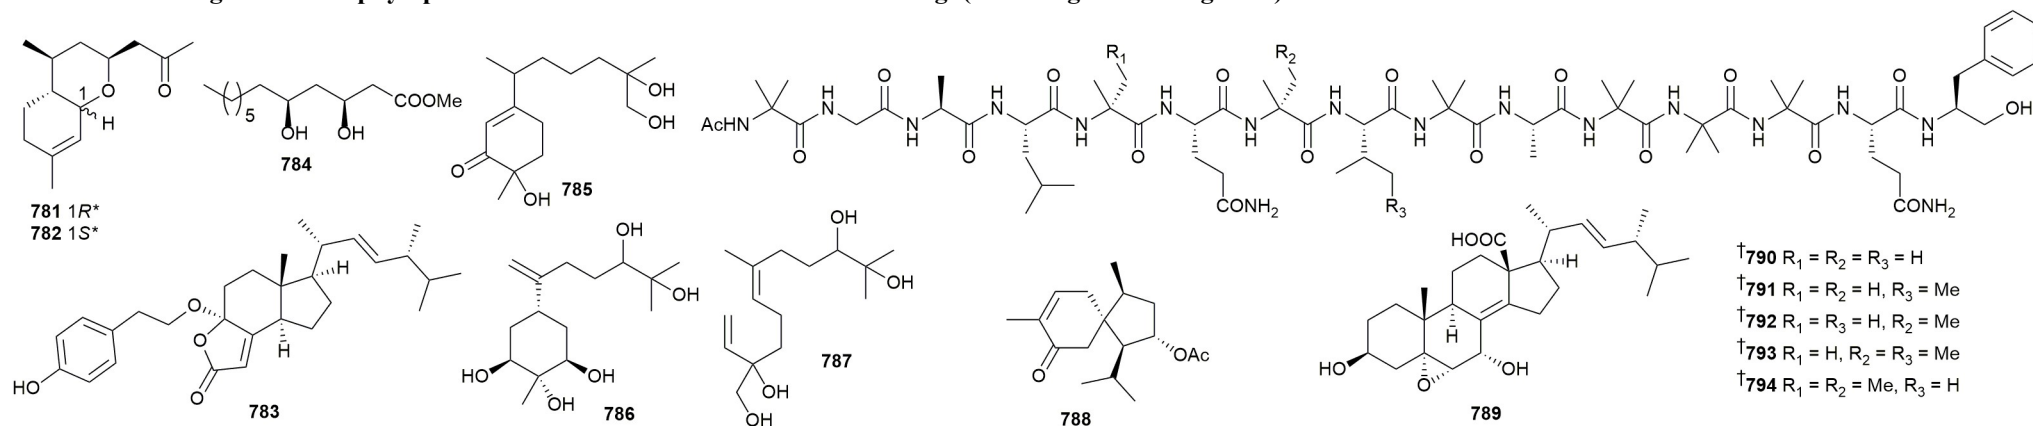

- 259 Ascomycota *Trichoderma atroviride* // (red alga, *Rhodomela confervoides*) Dalian, China // Sesquiterpenes and lipids from the algicolous fungus *Trichoderma atroviride* RR-dl-3-9  
 781 // N // trichobisabolin M // IA to weak inhib. vs 5 microb. strains; weak inhib. vs 4 phytoplankton.  
 782 // N // trichobisabolin N // IA vs 5 microb. strains; IA to weak inhib. vs 4 phytoplankton.  
 783 // N // 4-(*p*-hydroxyphenethoxy)demethylincisterol A3 // IA vs 5 microb. strains; IA to weak inhib. vs 4 phytoplankton.  
 784 // N // methyl 3,5-dihydroxydodecanoate // IA to weak inhib. vs 5 microb. strains; IA to weak inhib. vs 4 phytoplankton.
- 260 Ascomycota *Trichoderma brevicompactum* // (red alga, *Chondra tenuissima*) Dalian, China // Sesquiterpenoids and a steroid from the algicolous *Trichoderma brevicompactum*  
 785 // N // trichobisabolin O1/O2 // IA to weak inhib. vs 3 phytoplankton; IA vs 5 microb. strains.  
 786 // N // trichobisabolin P // weak to mod. inhib. vs 3 phytoplankton; IA vs 5 microb. strains.  
 787 // N // trichonerolin A/B // pot. inhib. vs 1 phytoplankton, IA vs 2 phytoplankton; IA vs 5 microb. strains.  
 788 // N // trichoacarin A // IA to weak inhib. vs 3 phytoplankton; IA vs 5 microb. strains.  
 789 // N // isoergokonin B // IA to weak inhib. vs 3 phytoplankton; IA vs 5 microb. strains.
- 261 Ascomycota *Trichoderma* sp // (sediment) Port-du-Bec, France // Pentadecaibins I–V: 15-residue peptaibols produced by a marine-derived *Trichoderma* sp. of the Harzianum clade  
 790 // N // pentadecaibin I // weak cytotox. vs 1 HTCL; IA to weak inhib. vs 2 microb. strains; IA vs 1 fungus.  
 791 // N // pentadecaibin II // weak cytotox. vs 1 HTCL; IA vs 2 microb. strains; IA vs 1 fungus.  
 792 // N // pentadecaibin III // mod. cytotox. vs 1 HTCL; IA to weak inhib. vs 2 microb. strains; IA vs 1 fungus.  
 793 // N // pentadecaibin IV // mod. cytotox. vs 1 HTCL; IA vs 2 microb. strains; IA vs 1 fungus.  
 794 // N // pentadecaibin V // mod. cytotox. vs 1 HTCL; IA to weak inhib. vs 2 microb. strains; IA vs 1 fungus.

2 Marine microorganisms and phytoplankton:

2.3 Marine-sourced fungi (excluding from mangroves)

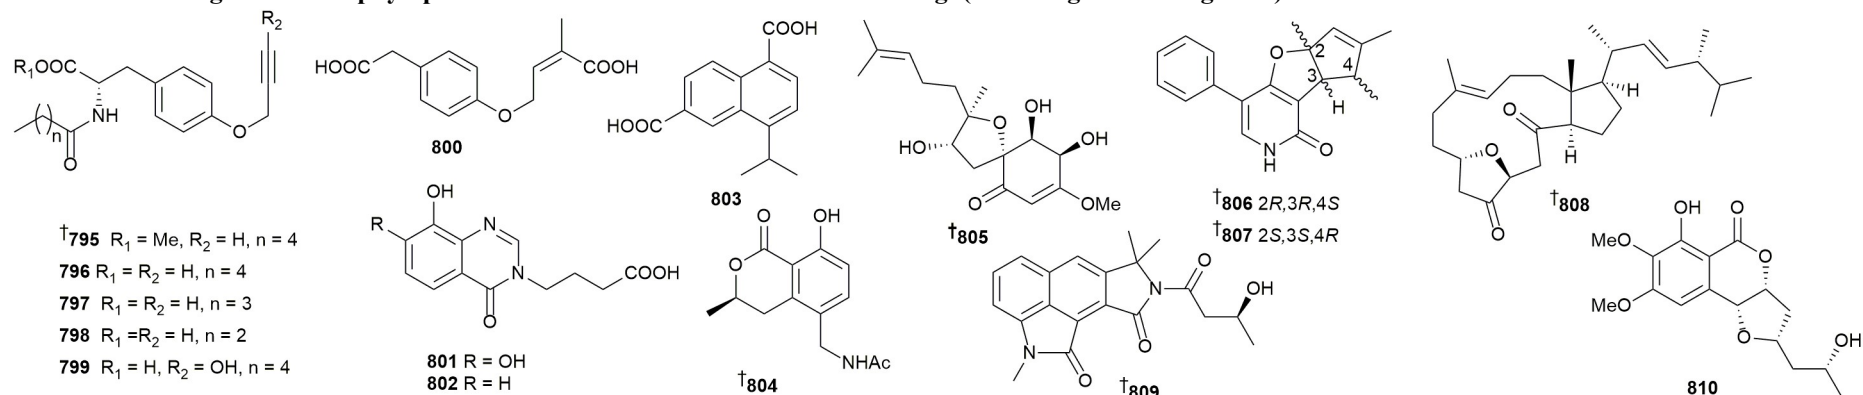

- 262 Ascomycota *Xylaria* sp // (soft coral, *Simularia densa*) Puhii Bay, Hawaii Big Island, USA // Secondary metabolites from the leather coral-derived fungal strain *Xylaria* sp. FM1005 and their glycoprotein IIb/IIIa inhibitory activity  
 795 // N // sinuxylamide A // mod. inhib. platelet aggregation; IA vs 1 HTCLs, IA vs 1 nHCL; IA vs 4 microb. strains.  
 796 // N // sinuxylamide B // mod. inhib. platelet aggregation; IA vs 1 HTCLs, IA vs 1 nHCL; IA vs 4 microb. strains.  
 797 // N // sinuxylamide C // IA vs 1 HTCLs, IA vs 1 nHCL; IA vs 4 microb. strains; NT vs platelet aggregation.  
 798 // N // sinuxylamide D // IA vs 1 HTCLs, IA vs 1 nHCL; IA vs 4 microb. strains; NT vs platelet aggregation.  
 799 // N // sinuxylamide E // IA vs 1 HTCLs, IA vs 1 nHCL; IA vs 4 microb. strains; NT vs platelet aggregation.  
 800 // N // (Z)-4-(4-(carboxymethyl)phenoxy)-2-methylbut-2-enoic acid // IA vs 1 HTCLs, IA vs 1 nHCL; IA vs 4 microb. strains; NT vs platelet aggregation.  
 801 // N // 4-(7,8-dihydroxy-4-oxoquinazolin-3(4H)-yl)butanoic acid // IA vs 1 HTCLs, IA vs 1 nHCL; IA vs 4 microb. strains; NT vs platelet aggregation.  
 802 // N // 4-(8-hydroxy-4-oxoquinazolin-3(4H)-yl)butanoic acid // IA vs 1 HTCLs, IA vs 1 nHCL; IA vs 4 microb. strains; NT vs platelet aggregation.  
 803 // N // 4-isopropyl-naphthalene-1,6-dicarboxylic acid // IA vs 1 HTCLs, IA vs 1 nHCL; IA vs 4 microb. strains; NT vs platelet aggregation.  
 804 // N // 1'-N-acetyl-5-methylmellein // IA vs 1 HTCLs, IA vs 1 nHCL; IA vs 4 microb. strains; NT vs platelet aggregation.
- 263 Ascomycota *Aspergillus flocculosus* // (sponge, *Stylissa* sp.) // Reisolation and structure revision of asperspiropene A  
 805 // R/M // asperspiropene A // NT.
- 264 Ascomycota *Penicillium sumatrense* // (unspecified source) Bohai Sea // Structure revision and protein tyrosine phosphatase inhibitory activity of drazepinone  
 806 // M // (+)-drazepinone // IA vs 4 protein tyrosine phosphatases.  
 807 // M // (-)-drazepinone // mod. inhib. vs PTP1B, weak inhib. vs TCPTP, IA vs 2 other PTPs.
- 265 Ascomycota *Sporormiella irregularis* // \* // Biogenesis-guided synthesis and structural revision of sarocladione enabled by ruthenium-catalyzed endoperoxide fragmentation  
 808 // R // sarocladione // NT.
- 266 Ascomycota *Aspergillus* sp. // (sediment) South China Sea // Antioxidant CPA-type indole alkaloids produced from the deep-sea derived fungus *Aspergillus* sp. SCSIO 41024  
 809 // M/R // asperorydine G // IA vs 3 HTCLs; IA vs 4 microb. strains; IA vs 1 fungus; IA vs antioxid. (DPPH).
- 267 Ascomycota *Exserohilum* sp // (zoanthid, *Palythoa haddonii*) Weizhou, China // Semisynthesis, antiplasmodial activity, and mechanism of action studies of isocoumarin derivatives  
 810 // M // (12S)-12-hydroxy-monocerin // mod. antiplasmodial activ; IA vs 2 parasites; IA vs 1 HTCL.

2 **Marine microorganisms and phytoplankton:**

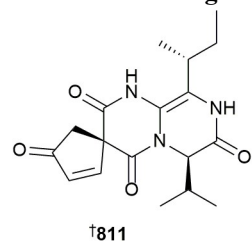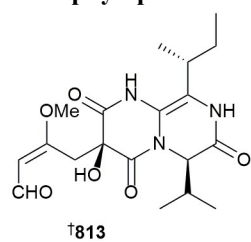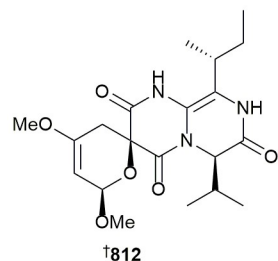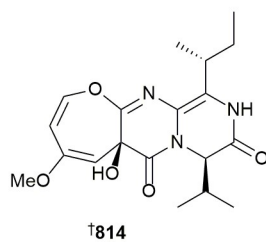

2.4 **Fungi from mangroves**

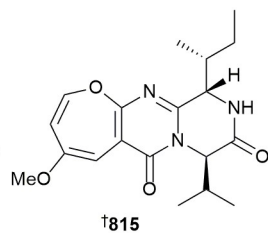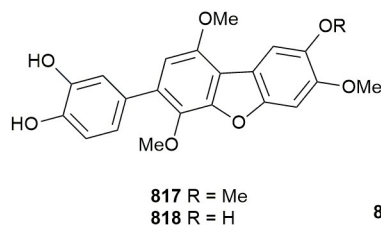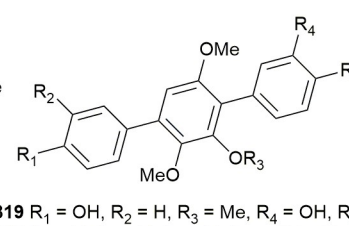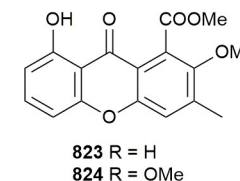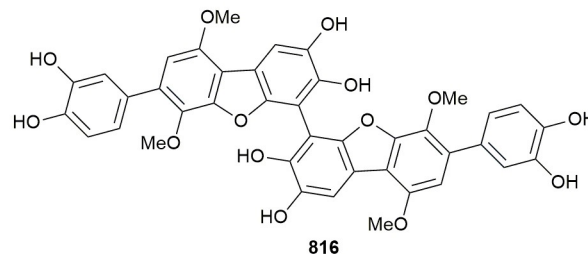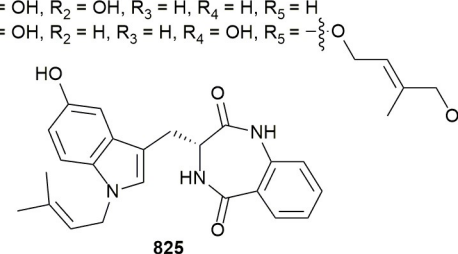

**313** Ascomycota *Aspergillus versicolor* // (rhizosphere soil, *Thespesia populnea*) Guangxi Province, China // Pyrazinopyrimidine alkaloids from a mangrove-derived fungus *Aspergillus versicolor* HDN11-84

**811** // N // pyrasplorine A // IA vs 4 HTCLs.

**812** // N // pyrasplorine B // IA vs 4 HTCLs.

**813** // N // pyrasplorine C // IA vs 4 HTCLs.

**814** // N // deg-pyrasplorine B // IA vs 4 HTCLs; IA vs 1 virus strain.

**815** // R // versicoloid A // IA vs 4 HTCLs.

**316** Ascomycota *Aspergillus candidus* // (root, *Rhizophora apiculata*) Sanya Bailu Park, Hainan Province, China // Polyhydroxy *p*-terphenyls from a mangrove endophytic fungus *Aspergillus candidus* LDJ-5

**816** // N // asperterphenyllin A // IA vs 12 HTCLs; IA vs 5 bact. strains; IA vs 1 virus strain; IA vs PTP1B.

**817** // N // asperterphenyllin B // IA vs 12 HTCLs; IA vs 5 bact. strains.

**818** // N // asperterphenyllin C // IA vs 12 HTCLs; IA to weak vs 5 bact. strains.

**819** // N // asperterphenyllin D // IA vs 12 HTCLs; IA vs 5 bact. strains.

**820** // N // asperterphenyllin E // IA vs 12 HTCLs; IA vs 5 bact. strains.

**821** // N // asperterphenyllin F // IA vs 12 HTCLs; IA vs 5 bact. strains.

**822** // N // asperterphenyllin G // weak to mod. cytotox. vs 12 HTCLs; IA vs 5 bact. strains.

**317** Ascomycota *Aspergillus* sp // (mangrove sediment) Yalong Bay, Sanya, Hainan, China // Three new metabolites from the marine-derived fungus *Aspergillus* sp. WHUF03110

**823** // N // spinosusone A // IA vs 18 bact. strain; IA vs 2 fungal strains.

**824** // N // spinosusone B // IA vs 18 bact. strain; IA vs 2 fungal strains.

**825** // N // asperdiazapinone G // IA vs 18 bact. strain; IA vs 2 fungal strains.

## 2 Marine microorganisms and phytoplankton:

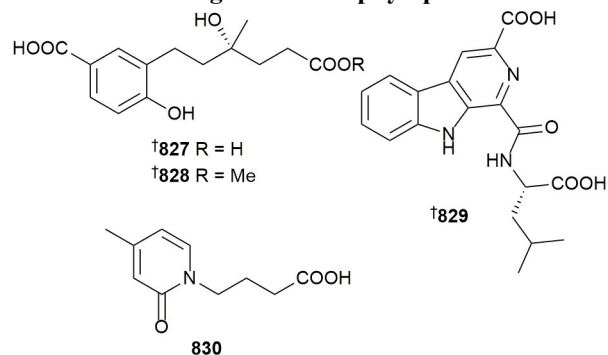

## 2.4 Fungi from mangroves

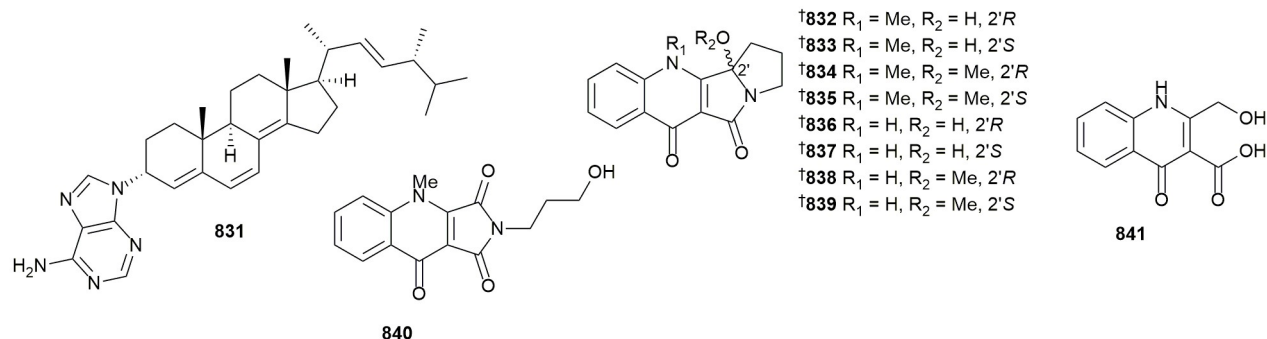

- 318** Ascomycota *Penicillium polonicum* // (mangrove sediment) Zhangjiangkou, Fujian province, China // Bioactive compounds derived from the marine-derived fungus MCCC3A00951 and their influenza neuraminidase inhibition activity *in vitro* and *in silico*  
**826** // N // 7-hydroxy-3,10-dehydrocyclopeptide // IA vs 1 virus strain.
- 319** Ascomycota *Cladosporium* sp // (root, *Ceriops tagal*) Dong Zhai Gang Mangrove Reserve. Hainan Province, China // Metabolites from the mangrove-derived fungus *Cladosporium* sp. HNWSW-1  
**827** // N // cladoslide A // IA vs 4 HTCLs; IA vs  $\alpha$ -glucosidase.  
**828** // N // cladoslide B // IA vs 4 HTCLs.  
**829** // N // cladospomine // IA vs 4 HTCLs.  
**830** // N // cladoslide C // IA vs 4 HTCLs.
- 320** Ascomycota *Penicillium brefeldianum*, Ascomycota *Penicillium dodgei* // (mangrove sediment) Dongzhaigang Mangrove Nature Reserve, Hainan province, China // New purinyl-steroid and other constituents from the marine fungus *Penicillium brefeldianum* ABC190807: larvicidal activities against *Aedes aegypti*  
**831** // N // (3 $\alpha$ ,22E)-ergosta-4,6,8(14),22-tetraen-3-(6-amino-9H-purin-9-yl // IA vs *Aedes aegypti* larvae.
- 321** Ascomycota *Penicillium steckii*, Ascomycota *Penicillium citrinum* // (root, *Avicennia marina*) Zhanjiang, Guangdong province, China // Pyrrolyl 4-quinolone alkaloids from the mangrove endophytic fungus *Penicillium steckii* SCSIO 41025: chiral resolution, configurational assignment, and enzyme inhibitory activities  
**832** // N // (+)-oxypenicinoline A // IA vs 2 HTCLs; IA vs 2 bact. strains; IA vs 5 fungal strains; IA vs AChE; IA vs  $\alpha$ -glucosidase.  
**833** // N // (-)-oxypenicinoline A // IA vs 2 HTCLs; IA vs 2 bact. strains; IA vs 5 fungal strains; IA vs AChE; IA vs  $\alpha$ -glucosidase.  
**834** // N // (+)-oxypenicinoline B // IA vs 2 HTCLs; IA vs 2 bact. strains; IA vs 5 fungal strains; IA vs AChE; IA vs  $\alpha$ -glucosidase.  
**835** // N // (-)-oxypenicinoline B // IA vs 2 HTCLs; IA vs 2 bact. strains; IA vs 5 fungal strains; IA vs AChE; IA vs  $\alpha$ -glucosidase.  
**836** // N // (+)-oxypenicinoline C // IA vs 2 HTCLs; IA vs 2 bact. strains; IA vs 5 fungal strains; IA vs AChE; IA vs  $\alpha$ -glucosidase.  
**837** // N // (-)-oxypenicinoline C // IA vs 2 HTCLs; IA vs 2 bact. strains; IA vs 5 fungal strains; IA vs AChE; IA vs  $\alpha$ -glucosidase.  
**838** // N // (+)-oxypenicinoline D // IA vs 2 HTCLs; IA vs 2 bact. strains; IA vs 5 fungal strains; IA vs AChE; IA vs  $\alpha$ -glucosidase.  
**839** // N // (-)-oxypenicinoline D // IA vs 2 HTCLs; IA vs 2 bact. strains; IA vs 5 fungal strains; IA vs AChE; IA vs  $\alpha$ -glucosidase.  
**840** // N // penicinoline F // IA vs 2 HTCLs; IA vs 2 bact. strains; IA vs 5 fungal strains; IA vs AChE; IA vs  $\alpha$ -glucosidase.  
**841** // N // penicinoline G // IA vs 2 HTCLs; IA vs 2 bact. strains; IA vs 5 fungal strains; IA vs AChE; IA vs  $\alpha$ -glucosidase.



2 **Marine microorganisms and phytoplankton:** 2.4 **Fungi from mangroves**

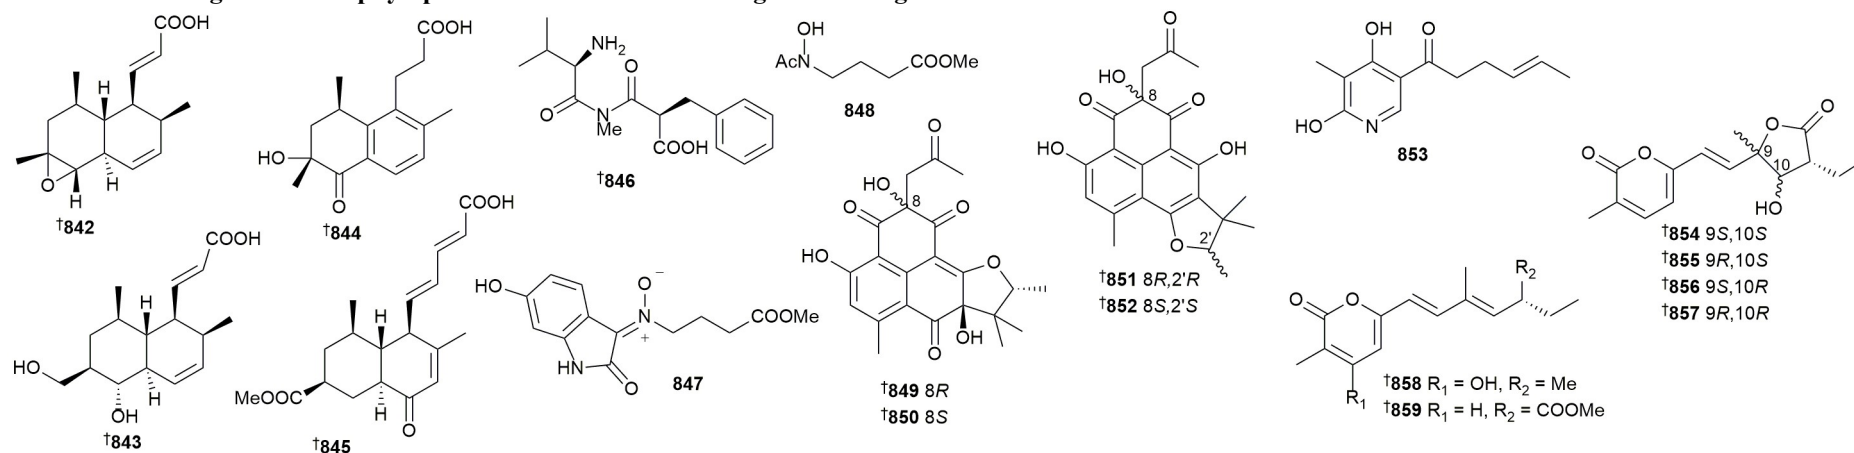

**322** Ascomycota *Penicillium steckii* // (roots, *Avicennia marina*) // Diversified polyketides and nitrogenous compounds from the mangrove endophytic fungus *Penicillium steckii* SCSIO 41025

- 842** // N // penicisteck acid A // IA vs 1 bact. strain; IA vs 5 fungal strains; IA vs  $\alpha$ -glucosidase.  
**843** // N // penicisteck acid B // IA vs 1 bact. strain; IA vs 5 fungal strains; IA vs  $\alpha$ -glucosidase.  
**844** // N // penicisteck acid C // IA vs 1 bact. strain; IA vs 5 fungal strains; IA vs  $\alpha$ -glucosidase.  
**845** // N // penicisteck acid D // IA vs 1 bact. strain; IA vs 5 fungal strains; IA vs  $\alpha$ -glucosidase.  
**846** // N // penicmariae-crucis C acid // IA vs 1 bact. strain; IA vs 5 fungal strains; IA vs  $\alpha$ -glucosidase.  
**847** // N // *N*-(6-hydroxy-2-oxoindolin-3-ylidene)-5'-methoxy-5'-oxobutyl-amine oxide // IA vs 1 bact. strain; IA vs 5 fungal strains; n IA vs  $\alpha$ -glucosidase.  
**848** // N // methyl-1'-(*N*-hydroxyacetamido)-butanoate // IA vs 1 bact. strain; IA vs 5 fungal strains; IA vs  $\alpha$ -glucosidase.

**323** Ascomycota *Penicillium herquei* // (rhizospere, *Rhizophora mucronata*) Hainan Island, P. R. China // Separation and configurational assignment of stereoisomeric phenalenones from the marine mangrove-derived fungus *Penicillium herquei* MA-370

- 849** // N // aceneoherqueinone A // weak inhib. AChE.  
**850** // N // aceneoherqueinone B // IA vs AChE.  
**851** // N // (+)-aceatrovenetinone A // IA vs AChE.  
**852** // N // (+)-aceatrovenetinone B // IA vs AChE.

**324** Ascomycota *Penicillium* sp // (rhizosphere soil, *Hibiscus tiliaceus*) Qinglan, Wenchang, Hainan Province, China // Isolation and characterization of anti-inflammatory sorbicillinoids from the mangrove-derived fungus *Penicillium* sp. DM815

- 853** // N // (4*E*)-1-(4,6-dihydroxy-5-methylpyridin-3-yl)hex-4-en-1-one // IA vs anti-inflam.

**325** Ascomycota *Penicillium* sp // (rhizosphere soil, *Rhizophora stylosa*) Yingluo Bay, Guangxi Province, People's Republic of China // Penipyrols C-G and methyl-penipyrol A,  $\alpha$ -pyrone polyketides from the mangrove derived fungus *Penicillium* sp. HDN-11-131

- 854** // N // penipyrol C // IA vs 1 HTCL; weak  $\beta$ -cell regeneration in zebra fish.  
**855** // N // penipyrol D // IA vs 1 HTCL.  
**856** // N // penipyrol E // IA vs 1 HTCL.  
**857** // N // penipyrol F // IA vs 1 HTCL.  
**858** // N // penipyrol G // IA vs 1 HTCL.  
**859** // N // methyl-penipyrol A // IA vs 1 HTCL.

**Key:** Main article bibliography reference // Taxonomy // Location // Article title  
 Compound number // Status // Compound name // Biological activity and Other information

2 Marine microorganisms and phytoplankton:

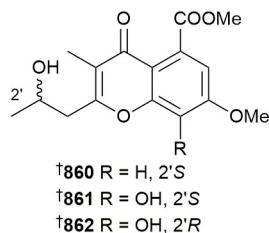

2.4 Fungi from mangroves

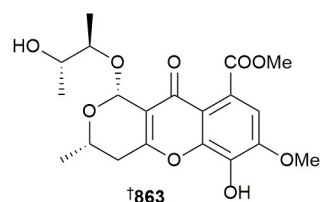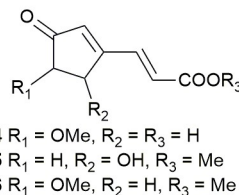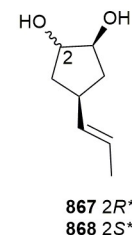

- 326** Ascomycota *Phomopsis asparagi* // (roots, *Rhizophora mangle*) Dong Zhai Gang-Mangrove Garden, Hainan Island, China // Four new chromones from the endophytic fungus *Phomopsis asparagi* DHS-48 isolated from the Chinese mangrove plant *Rhizophora mangle*  
**860** // N // phomochromenone D // IA vs ConA and LPS induced cell proliferation.  
**861** // N // phomochromenone E // IA vs ConA and LPS induced cell proliferation.  
**862** // N // phomochromenone F // IA vs ConA and LPS induced cell proliferation.  
**863** // N // phomochromenone G // IA vs ConA and LPS induced cell proliferation.
- 327** Ascomycota *Trichoderma atroviride* // (mangrove sediment) Zhangjiangkou Mangrove National Nature Reserve, Fujian province, China // New cyclopentenoneacrylic acid derivatives from a marine-derived fungus *Trichoderma atroviride* H548  
**864** // N // trichodermacid A // IA vs 1 fungal strain.  
**865** // N // trichodermester A // IA vs 1 fungal strain.  
**866** // N // trichodermester B // IA vs 1 fungal strain.
- 328** Ascomycota *Aspergillus flavipes* // (pneumatophores of *Acanthus ilicifolius*, Mandovi River, Banastarim, Goa, India // Chemical investigation of marine-derived fungus *Aspergillus flavipes* for potential anti-inflammatory agents  
**867** // N // 4β-[(1E)-propen-1-yl]cyclopentane-1β,2β-diol // IA vs TNF-α and IL6 secretion in LPS stimulated THP-1 cells.  
**868** // N // 4β-[(1E)-propen-1-yl]cyclopentane-1β,2α-diol // IA vs TNF-α and IL6 secretion in LPS stimulated THP-1 cells.

## 2 Marine microorganisms of phytoplankton

## 2.5 Dinoflagellates

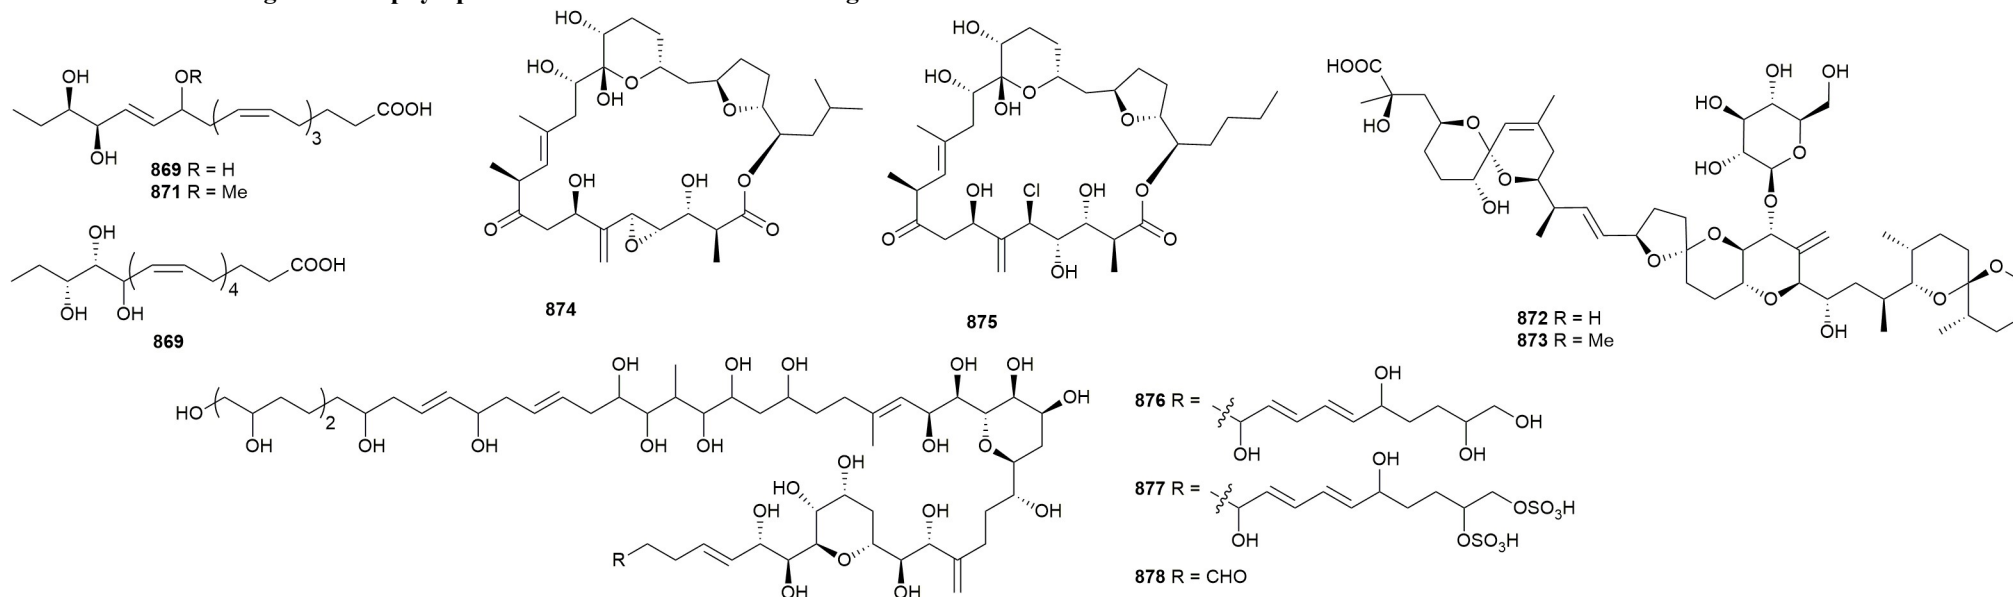

- 334** Bacillariophyta *Cylindrotheca closterium* // BCCM diatom collection // 14,17,18-Trihydroxy-eicosatetraenoic acid: a novel pro-resolving lipid mediator from marine microalgae  
**869** // N // 14*S*,17*R*,18*R*-trihydroxy-eicosatetraenoic acid // pot. anti-inflam.  
**870** // N // 16*R*,17*S*,18*R*-trihydroxy-eicosatetraenoic acid // NT.  
**871** // N // 17*R*,18*R*-dihydroxy-14*R*/*S*-methoxy-eicosatetraenoic acid // NT.
- 335** Miozoa *Dinophysis* sp // Bueu, Ría de Pontevedra, Spain // Identification of 24-*O*- $\beta$ -D-glycosides and 7-deoxy-analogues of okadaic acid and dinophysistoxin-1 and -2 in extracts from *Dinophysis* blooms, *Dinophysis* and *Prorocentrum* cultures, and shellfish in Europe, North America and Australasia  
**872** // N // okadaic acid 24-*O*- $\beta$ -D-glucoside // NT; det.in cultures and mussels.  
**873** // N // dinophysistoxin 2 24-*O*- $\beta$ -D-glucoside // NT; det.in cultures and mussels.
- 336** Miozoa *Amphidinium* sp // Iriomote Island, Japan // Structure and stereochemistry of amphidinolide N congeners from marine dinoflagellate *Amphidinium* species  
**874** // N // isocaribenolide-I // pot. cytotox. vs 1 HTCL.  
**875** // N // C<sub>33</sub>H<sub>53</sub>ClO<sub>11</sub> // pot. cytotox. vs 1 HTCL.
- 337** Miozoa *Amphidinium carterae* // Culture collection, Vigo, Spain // Isolation and structural elucidation of new amphidinol analogues from *Amphidinium carterae* cultivated in a pilot-scale photobioreactor  
**876** // N // amphidinol 24 // IA as haemolytic.  
**877** // N // amphidinol 25 // IA as haemolytic.  
**878** // N // amphidinol 26 // IA as haemolytic.

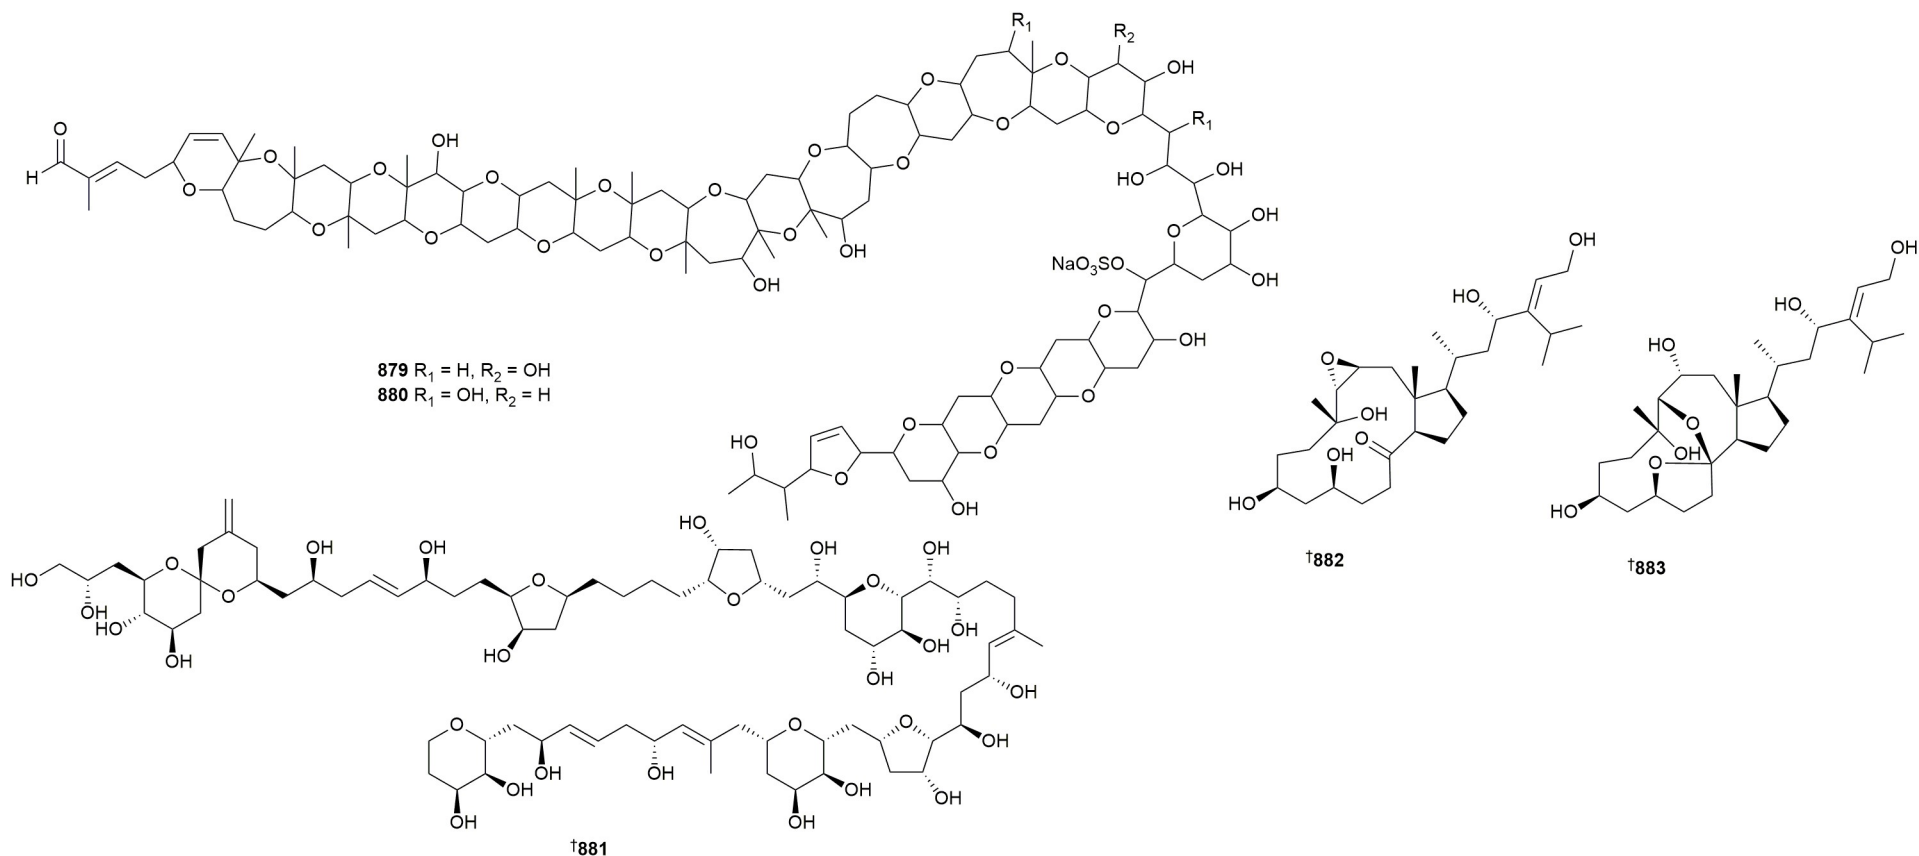

- 338** Miozoa *Karenia brevisulcata* // Wellington Harbor, New Zealand // Brevisulcenals-A1 and A2, sulfate esters of brevisulcenals, isolated from the red tide dinoflagellate *Karenia brevisulcata*  
**879** // N // brevisulcenal-A1 // pot. cytotox. vs 1 HTCL; presence of sulfate ester reduces activity.  
**880** // N // brevisulcenal-A2 // pot. cytotox. vs 1 HTCL; presence of sulfate ester reduces activity.
- 339** Miozoa // Lingshui Bay, Hainan Province, PR China // Discovery of benthol A and its challenging stereochemical assignment: opening up a new window for skeletal diversity of super-carbon-chain compounds  
**881** // N // benthol A // pot. inhib. vs *P. falciparum*; abs. config. of 35 stereochem. centres determ.
- 340** Miozoa *Amphidinium gibbosum* // Lingshui Bay, Hainan Province, PR China // A water-soluble 5/14-carbocyclic steroid with a trans-9,11-epoxy ring from the marine dinoflagellate *Amphidinium gibbosum*: insights into late-stage diversification of steroids  
**882** // N // gibbosterol A // weak to mod. agonist of human Pregnane X Receptor; water soluble steroid.  
**883** // N //  $C_{29}H_{50}O_7$  // IA vs human Pregnane X Receptor; acid cat. prod. of rearrangment of **882**.

2 Marine microorganisms of phytoplankton

2.5 Dinoflagellates

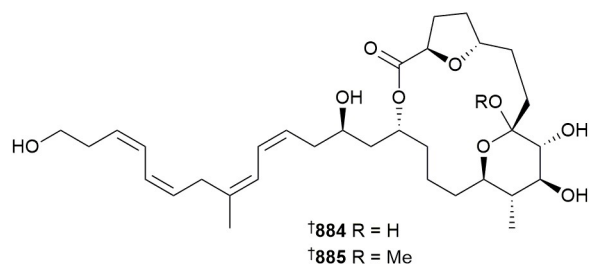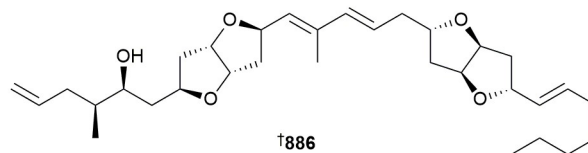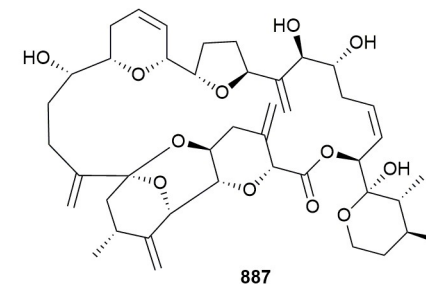

- 345 Miozoa *Prorocentrum* sp. // \* // The formosalides: structure determination by total synthesis  
 884 // R // formosalide A // rel. and abs. stereochem. est. by total synth.  
 885 // R // formosalide B // rel. and abs. stereochem. est. by total synth.  
 346 Miozoa // \* // Total synthesis and complete configurational assignment of amphirionin-2  
 886 // R // amphirionin-2 // Rev. by total synth.  
 356 Miozoa *Alexandrium* sp // \* // Alkali metal- and acid-catalyzed interconversion of goniodomin A with congeners B and C  
 887 // R // goniodomin B // rev. by NMR anal., new isomer discovered in solution.

### 3 Green Algae

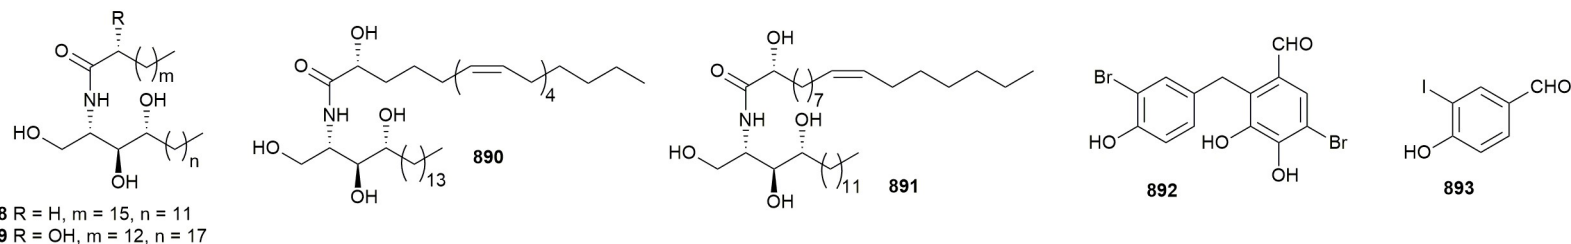

- 364** Chlorophyta *Ulva lactuca* // Safaga, Egypt // Chemical composition of the Red Sea green algae *Ulva lactuca*: isolation and *in silico* studies of new anti-COVID-19 ceramides  
**888** // N // *N*-[(2*S*,3*R*,4*R*)-1,3,4-trihydroxy-hexadecan-2-yl] octadecanamide // *in silico* predicted activ.  
**889** // N // 2-hydroxy-*N*-[(2*S*,3*R*,4*R*)-1,3,4-trihydroxy-docosan-2-yl] pentadecanamide // *in silico* predicted activ.  
**890** // N // 2-hydroxy-*N*-[(2*S*,3*R*,4*R*)-1,3,4-trihydroxy-octadecan-2-yl] henicosa-6,9,12,15-tetraene-amide // *in silico* predicted activ.  
**891** // N // 2-hydroxy-*N*-[(2*S*,3*R*,4*R*)-1,3,4-trihydroxy-hexadecan-2-yl]-10-heptadecanamide // *on silico* predicted activ.
- 365** Chlorophyta *Avrainvillea amadelpha* // Al-Kharrar Lagoon, Saudi Red Sea coast // Halo-phenolic metabolites and their *in vitro* antioxidant and cytotoxic activities from the Red Sea alga *Avrainvillea amadelpha*  
**892** // N // avrainvilleal // weak anti-inflam. activ.; weak cytotox. vs 1 of 3 HTCLs.  
**893** // N // 3-iodo-4-hydroxybenzaldehyde // IA vs anti-inflam. activ.; IA vs 3 HTCLs.

#### 4 Brown algae

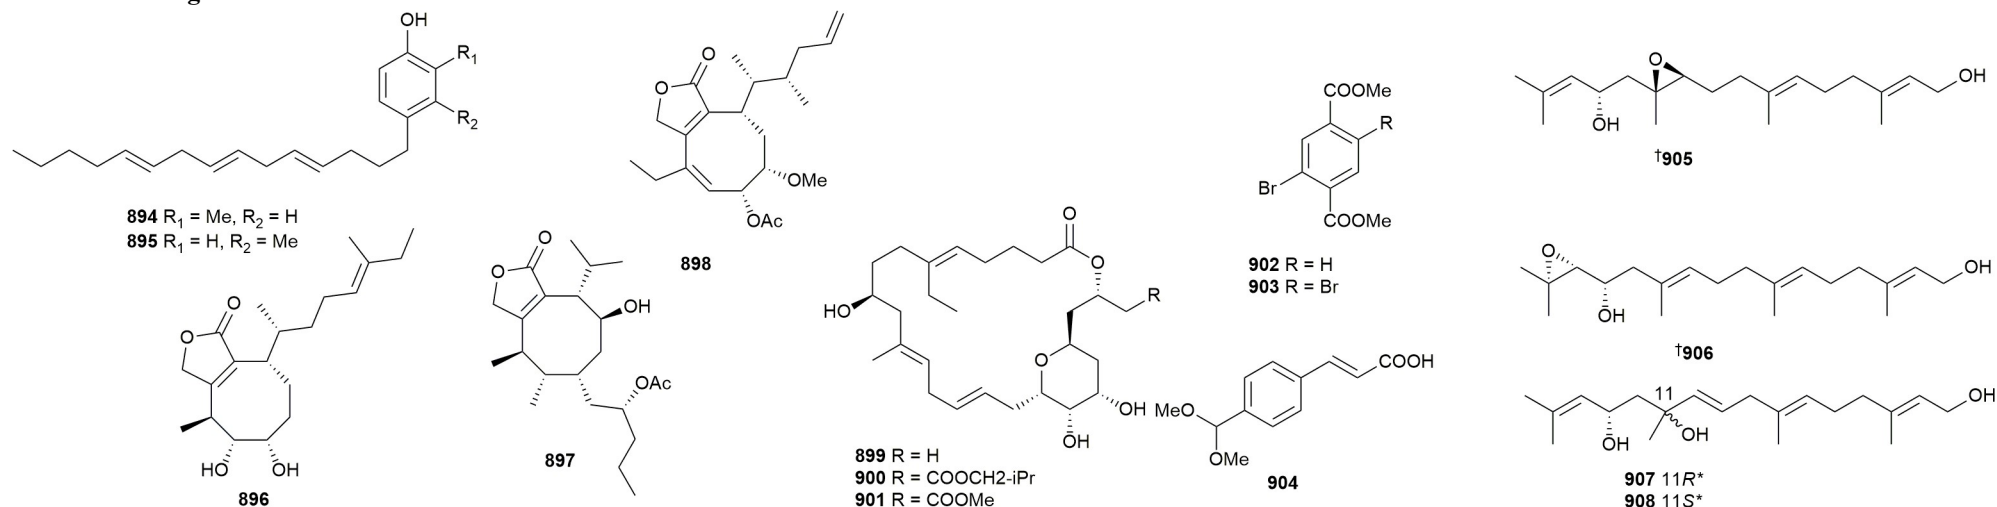

- 372** Ochrophyta *Sargassum cinereum* // Hurghada, Egypt // Potential anticancer lipoxygenase inhibitors from the Red Sea-derived brown algae *Sargassum cinereum*: an in-silico-supported in-vitro study  
**894** // N // 4-(1-(4,7,11-pentadecenyl)-*o*-cresol) // IA vs 3 HTCLs; weak inib. of 1 of 2 Lectin-like oxidized low-density lipoprotein (LDL) receptor (LOX) isoforms.  
**895** // N // 4-(1-(4,7,11-pentadecenyl)-*m*-cresol) // IA vs 3 HTCLs; weak inib. of 1 of 2 LOX isoforms.
- 373** Ochrophyta *Turbinaria ornata* // Mannar region, Mandapam, India // Turbinafuranone A-C, new 2-furanone analogues from marine macroalga *Turbinaria ornata* as prospective anti-hyperglycemic agents attenuate tyrosine phosphatase-1B  
**896** // N // turbinafuranone A // IA vs PTP1B.  
**897** // N // turbinafuranone B // IA vs PTP1B.  
**898** // N // turbinafuranone C // IA vs PTP1B.
- 374** Ochrophyta *Turbinaria conoides* // Mandapam region, Gulf of Mannar, India // Conoidecyclics A-C from marine macroalga *Turbinaria conoides*: newly described natural macrolides with prospective bioactive properties  
**899** // N // conoidecyclic A // IA vs antioxid.; IA vs anti-inflam..  
**900** // N // conoidecyclic B // IA vs antioxid.; IA vs anti-inflam.  
**901** // N // conoidecyclic C // IA vs antioxid.; IA vs anti-inflam.
- 375** Ochrophyta *Dictyopteris hoytii* // Raysut, Dhofar, Oman // New carbonic anhydrase-II inhibitors from marine macro brown alga *Dictyopteris hoytii* supported by in silico studies  
**902** // M // dimethyl 2-bromoterephthalate // IA vs carbonic anhydrase.  
**903** // M // dimethyl 2,6-dibromoterephthalate // IA vs carbonic anhydrase.  
**904** // M // (*E*)-3-(4-(dimethoxymethyl)phenyl)acrylic acid // IA vs carbonic anhydrase.
- 376** Ochrophyta *Bifurcaria bifurcata* // Kilkee, County Clare, Ireland // Density functional theory (DFT)-aided structure elucidation of linear diterpenes from the Irish brown seaweed *Bifurcaria bifurcata*  
**905** // N // 10*S*,11*S*-epoxyeleganediol // IA vs 1 HTCL.  
**906** // N // 14*R*,15-epoxyeleganediol // IA vs 1 HTCL.  
**907** // N // 11*R*-hydroxyeleganediol // IA vs 1 HTCL.  
**908** // N // 11*S*-hydroxyeleganediol // IA vs 1 HTCL.

**Key:** Main article bibliography reference // Taxonomy // Location // Article title  
 Compound number // Status // Compound name // Biological activity and Other information

#### 4 Brown algae

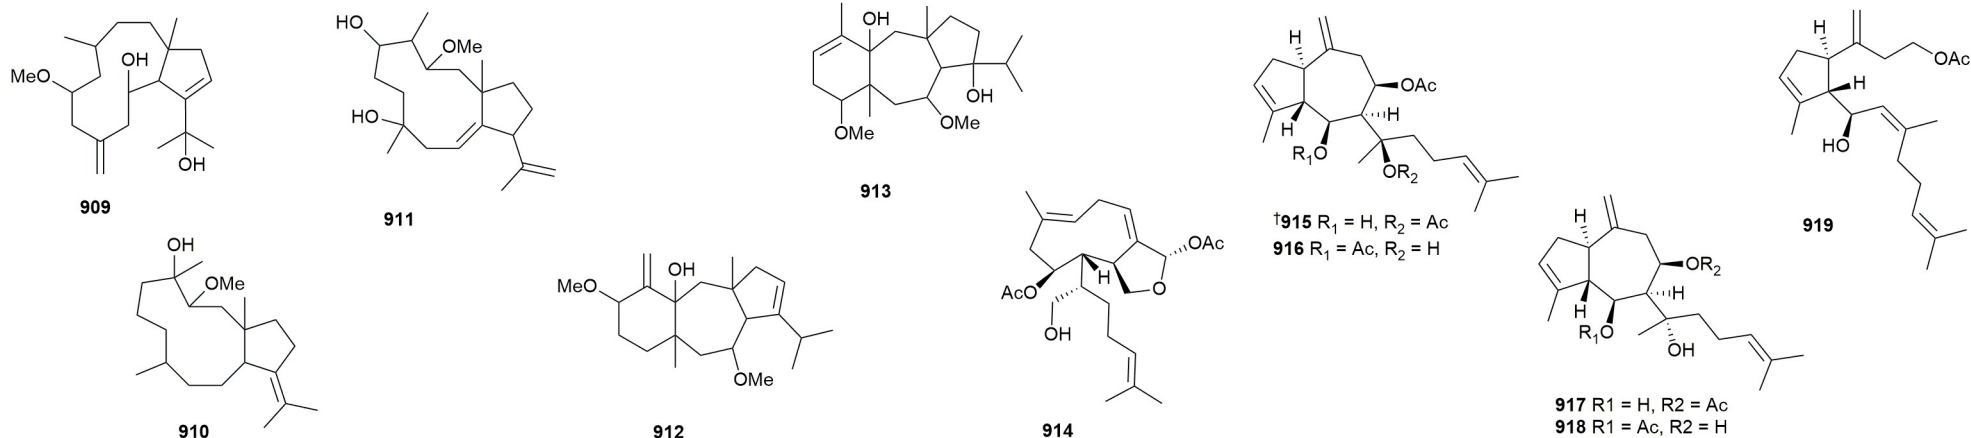

- 377** Ochrophyta *Padina tetrastromatica* // Mandapam, India // Antioxidative dolabellanes and dolastanes from brown seaweed *Padina tetrastromatica* as dual inhibitors of starch digestive enzymes  
**909** // N // 6-methoxy-dolabella-8(17),12-diene-10 $\beta$ ,18-diol // IA vs antioxidant.; IA vs amylase inhib.  
**910** // N // 3-methoxy-dolabella-12(18)-ene-4 $\beta$ -ol // IA vs antioxidant.; IA vs amylase inhib.  
**911** // N // 3-methoxy-dolabella-10,18(19)-diene-5 $\alpha$ ,8 $\beta$ -diol // IA vs antioxidant.; IA vs amylase inhib.  
**912** // N // 2,7-dimethoxy-14 $\alpha$ -hydroxy-dolasta-1(15),9-diene // IA vs antioxidant.; IA vs amylase inhib.  
**913** // N // 4,7-dimethoxy-9 $\beta$ ,14 $\alpha$ -dihydroxy-dolasta-1-ene // IA vs antioxidant.; IA vs amylase inhib.
- 378** Ochrophyta *Sargassum ilicifolium* // Gulf of Mannar, India // Anti-inflammatory xenicane-type diterpenoid from the intertidal brown seaweed *Sargassum ilicifolium*  
**914** // N // sargilicixenicane // IA vs antioxidant.; IA vs anti-inflam.
- 379** Ochrophyta *Dictyota* sp // Lingtou Bay, Sanya, Hainan Province, China // Hydroazulene diterpenes from a *Dictyota* brown alga and their antioxidant and neuroprotective effects against cerebral ischemia-reperfusion injury  
**915** // N // (8*R*,11*R*)-8,11-diacetoxypachydictyol A // weak to mod. cytoprotective against H<sub>2</sub>O<sub>2</sub> induced damage.  
**916** // N // (8*R*\*,11*R*\*)-6-*O*-acetyl-8-acetoxy-11-hydroxypachydictyol A // weak to mod. cytoprotective against H<sub>2</sub>O<sub>2</sub> induced damage.  
**917** // N // (8*R*\*,11*S*\*)-8-acetoxy-11-hydroxypachydictyol A // weak to mod. cytoprotective against H<sub>2</sub>O<sub>2</sub> induced damage.  
**918** // N // (8*R*\*,11*S*\*)-6-*O*-acetyl-8,11-dihydroxypachydictyol A // weak to mod. cytoprotective against H<sub>2</sub>O<sub>2</sub> induced damage.  
**919** // N // 7*Z*-7,8-seco-7,11-didehydro-8-acetoxypachydictyol A // weak to mod. cytoprotective against H<sub>2</sub>O<sub>2</sub> induced damage.



#### 4 Brown algae

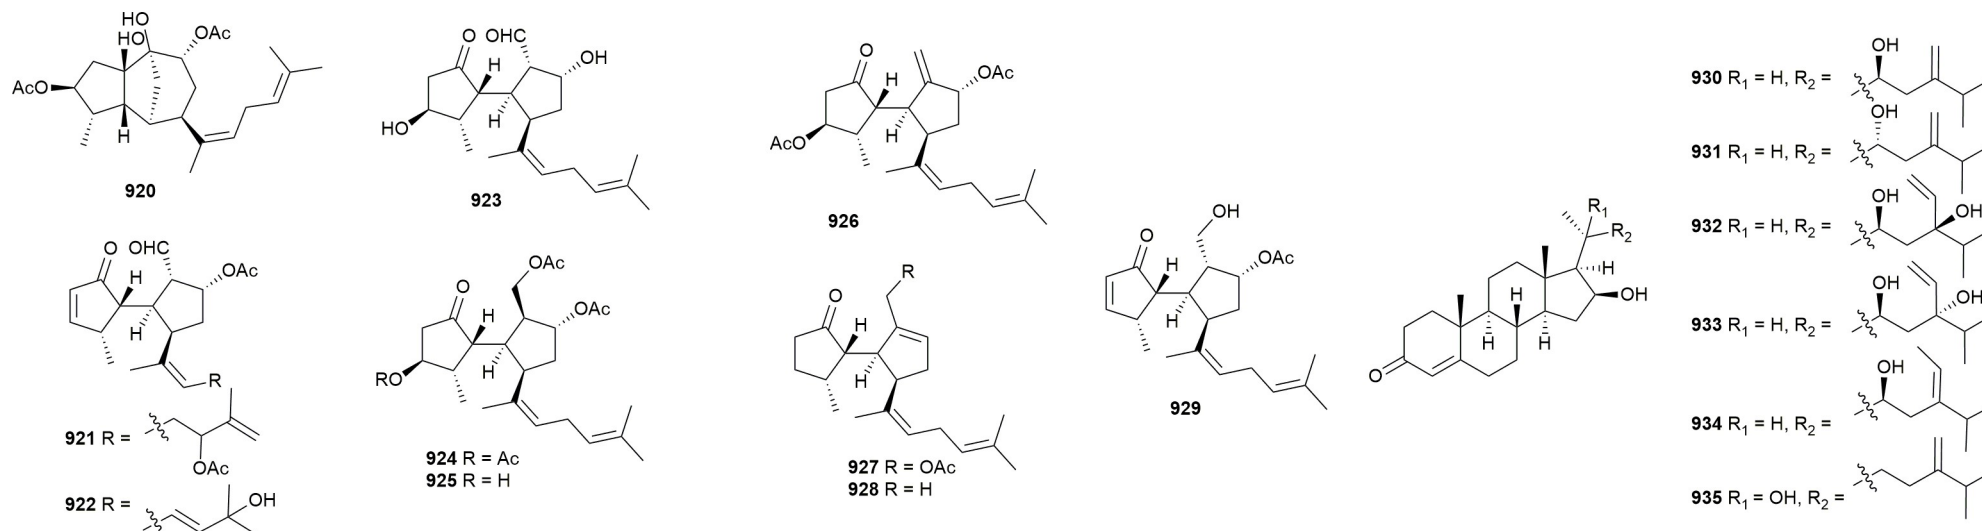

**380** Ochrophyta *Rugulopteryx okamurae* // Punta Carnero, Cádiz, Spain // Diterpenoids from the brown alga *Rugulopteryx okamurae* and their anti-inflammatory activity

**920** // N // rugukadiol A // IA vs RAW264.7; mod. inhib. NO prod.

**921** // N // rugukamural A // NT.

**922** // N // rugukamural B // NT.

**923** // N // rugukamural C // IA vs RAW264.7; mod. inhib. NO prod.

**924** // N // ruguloptone A // IA vs RAW264.7; mod. inhib. NO prod.

**925** // N // ruguloptone B // IA vs RAW264.7; mod. inhib. NO prod.

**926** // N // ruguloptone C // IA vs RAW264.7; mod. inhib. NO prod.

**927** // N // ruguloptone D // NT.

**928** // N // ruguloptone E // NT.

**929** // N // ruguloptone F // IA vs RAW264.7; mod. inhib. NO prod.

**381** Ochrophyta *Cystophora xiphocarpa* // Spikey Beach, Tasmania, Australia // Bioactive  $\alpha,\beta$ -conjugated 3-keto-steroids from the Australian brown alga *Cystophora xiphocarpa*

**930** // N // (16*S*,22*S*)-16,22-dihydroxyergosta-4,24(28)-dien-3-one // IA vs 12 HTCLs.

**931** // N // (16*S*,22*R*)-16,22-dihydroxyergosta-4,24(28)-dien-3-one // IA vs 12 HTCLs.

**932** // N // (16*S*,22*S*,24*R*)-16,22,24-trihydroxyperifera-4,28-dien-3-one // IA vs 12 HTCLs.

**933** // N // (16*S*,22*S*,24*S*)-16,22,24-trihydroxystigma-4,28-diene-3-one // IA vs 12 HTCLs.

**934** // N // (16*S*,22*S*,24*E*)-16,22-dihydroxystigma-4,24(28)-dien-3-one // IA vs 12 HTCLs.

**935** // N // (16*S*,20*S*)-16,20-dihydroxyergost-4,24(28)-dien-3-one // IA vs 12 HTCLs.

**Key:** Main article bibliography reference // Taxonomy // Location // Article title

Compound number // Status // Compound name // Biological activity and Other information

5 Red algae

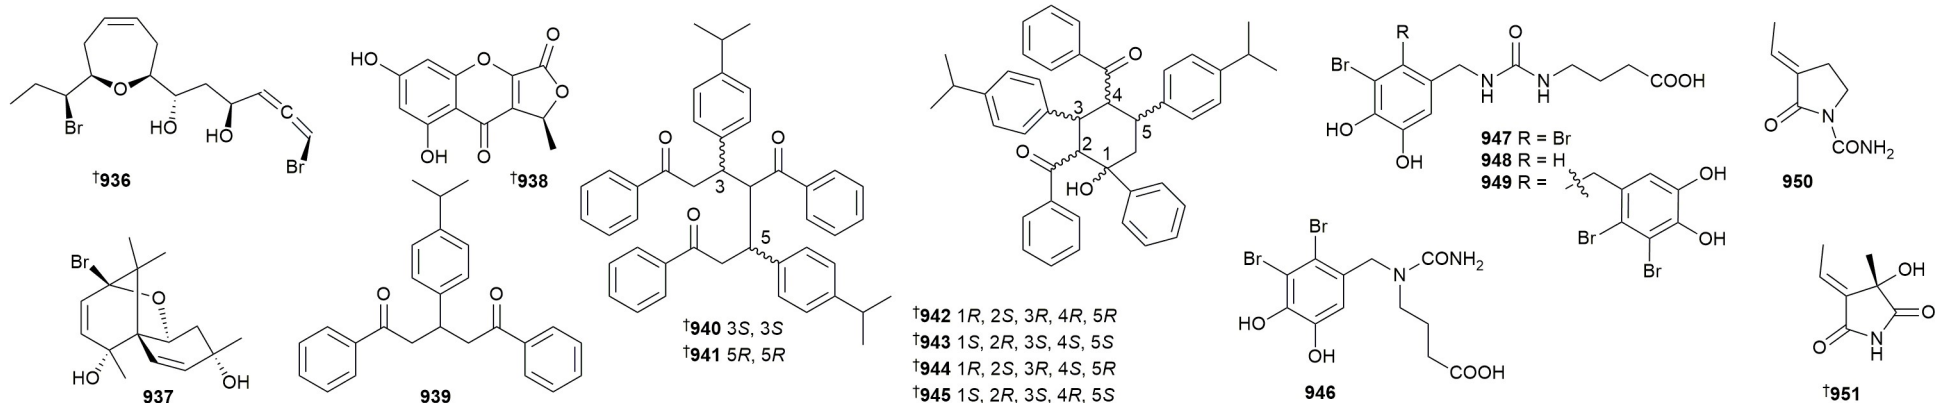

- 391** Rhodophyta *Laurencia nipponica* // Kunashiri Island, Hokkaido, Japan // Two new halogenated compounds from the marine red alga *Laurencia nipponica* Yamada from the Kunashiri and Etorofu Islands  
**936** // N // deacetylneonipponallene // IA vs nemotode.  
**937** // N // neopacifenol // IA vs nemotode.
- 392** Rhodophyta *Solieria* sp // Xuwen County, Zhanjiang City, Guangdong Province, China // Solieritide A, a new polyketide from the red alga *Solieria* sp  
**938** // N // solieritide A // IA vs 6 bact. strains.
- 393** Rhodophyta *Laurencia tristicha* // Pingyu Island, South China Sea // Condensation derivatives of 4-isopropylbenzaldehyde with acetophenone from the red alga *Laurencia tristicha*  
**939** // N // 1,5-diphenyl-3-(4-isopropylphenyl)-pentane-1,5-dione // NT.  
**940** // N // 4-benzoyl-3*S*,5*S*-di(4-isopropylphenyl)-1,7-diphenylheptane-1,7-dione // NT; isol. as rac., sep. by chiral HPLC.  
**941** // N // 4-benzoyl-3*R*,5*R*-di(4-isopropylphenyl)-1,7-diphenylheptane-1,7-dione // NT; isol. as rac., sep. by chiral HPLC.  
**942** // N // 2*S*,4*R*-dibenzoyl-3*R*,5*R*-di(4-isopropylphenyl)-1*R*-phenyl-cyclohexanol // NT; isol. as rac., sep. by chiral HPLC.  
**943** // N // 2*R*,4*S*-dibenzoyl-3*S*,5*S*-di(4-isopropylphenyl)-1*S*-phenyl-cyclohexanol // NT; isol. as rac., sep. by chiral HPLC.  
**944** // N // 2*S*,4*S*-dibenzoyl-3*R*,5*R*-di(4-isopropylphenyl)-1*R*-phenyl-cyclohexanol // NT; isol. as rac., sep. by chiral HPLC.  
**945** // N // 2*R*,4*R*-dibenzoyl-3*S*,5*S*-di(4-isopropylphenyl)-1*S*-phenyl-cyclohexanol // NT; isol. as rac., sep. by chiral HPLC.
- 394** Rhodophyta *Rhodomela confervoides* // Fujiazhuang beach, Dalian, China // Naturally occurring ureidobromophenols with potent antioxidant activities from the marine red alga *Rhodomela confervoides*  
**946** // N // *N*-(2,3-dibromo-4,5-dihydroxybenzyl)- $\gamma$ -ureidobutyric acid // weak antioxid. activ.  
**947** // N // *N*-(2,3-dibromo-4,5-dihydroxybenzyl)- $\gamma$ -ureidobutyric acid // weak antioxid. activ.  
**948** // N // *N*-(3-bromo-4,5-dihydroxybenzyl)- $\gamma$ -ureidobutyric acid // weak antioxid. activ.  
**949** // N // *N*-[3-bromo-2-(2,3-dibromo-4,5-dihydroxybenzyl)-4,5-dihydroxybenzyl]- $\gamma$ -ureidobutyric acid // weak antioxid. activ.
- 395** Rhodophyta *Acanthophora spicifera* // Xuwen County, Zhanjiang City, Guangdong Province, China // Two new pyrrolidine alkaloids from the red alga *Acanthophora spicifera*  
**950** // N // acanthophoraine B // IA vs 6 bact. strains.  
**951** // N // acanthophoraine C // IA vs 6 bact. strains.

5 Red algae

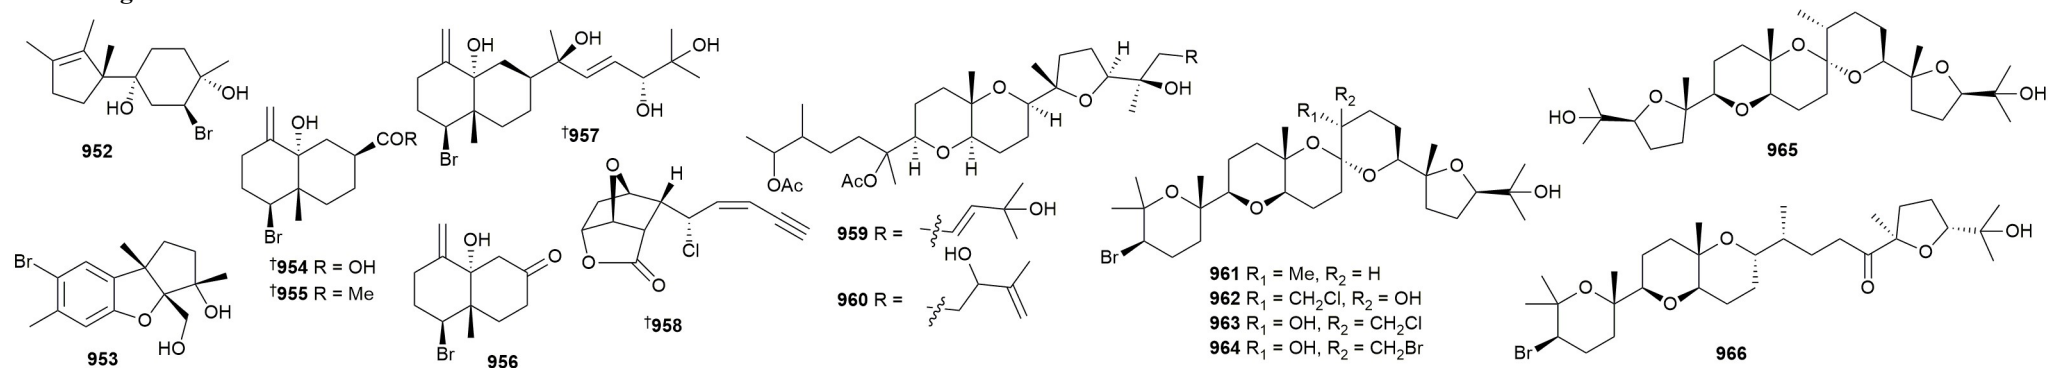

- 396** Rhodophyta *Laurencia heteroclada* // Tangalle, Sri Lanka // Allelopathic activity of some Sri Lankan seaweed extracts and the isolation of a new brominated nonaromatic isolaurene type sesquiterpene from red alga *Laurencia heteroclada* Harvey  
**952** // N // 2-bromo-3,5,6-trihydro-1,4-dihydroxy isolaurene // IA as germination inhib.
- 397** Rhodophyta *Laurencia tristicha* // Pingyu Island, South China Sea // Antioxidant terpenoids from the red alga *Laurencia tristicha*  
**953** // N // 10-hydroxyepiaplysinol // weak antioxid. activ.
- 398** Rhodophyta *Laurencia papillosa* // Ras Abu-Bakr, Red Sea, Egypt // New haloterpenes from the marine red alga *Laurencia papillosa*: structure elucidation and biological activity  
**954** // N // alysiolic acid // weak activ. vs 1 of 10 bact. strains.  
**955** // N // 7-acetyl-aplysiol // IA vs 10 bact. strains.  
**956** // N // alysiol-7-one // weak activ. vs 1 of 10 bact. strains.  
**957** // N // 11,14-dihydroaplysia-5,11,14,15-tetrol // IA vs 10 bact. strains.  
**958** // N // 5-epi-maneolactone // IA vs 10 bact. strains.
- 399** Rhodophyta *Chondria armata* // Bandakorobana, Minami-kyushu City, Kagoshima, Japan // Two new pyrrolidine alkaloids from the red alga *Acanthophora spicifera*  
**959** // N // bandakorol A // weak activ. vs 1 HTCL.  
**960** // N // bandakorol B // weak activ. vs 1 HTCL.
- 400** Rhodophyta *Laurencia viridis* // Paraiso Floral, Tenerife, Canary Islands // Structure and computational basis for backbone rearrangement in marine oxasqualenoids  
**961** // N // laurokanol A // NT.  
**962** // N // laurokanol B // NT.  
**963** // N // laurokanol C // NT.  
**964** // N // laurokanol D // NT.  
**965** // N // laurokanol E // NT.  
**966** // N // yucatecone // NT; first example of biosynthetically unusual thysiferol epimer.

## 6 Sponges

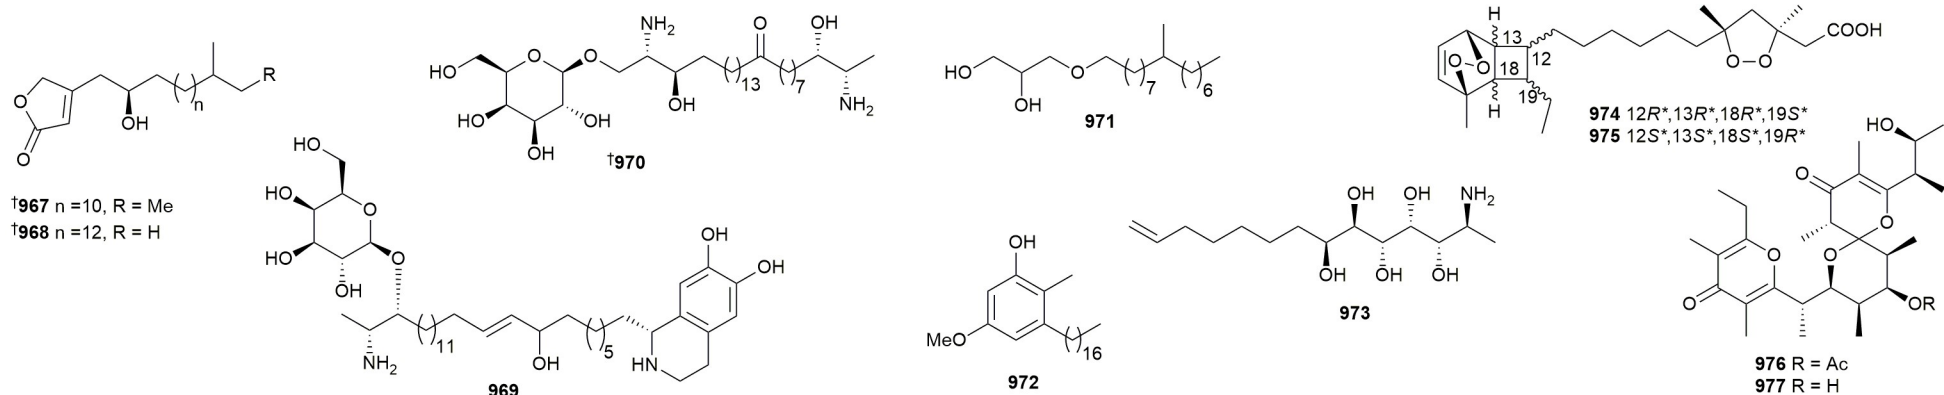

- 411** Porifera *Hippospongia lachne* // Xisha Islands, South China Sea // Hippobutenolides A and B, two new long-chain fatty acid esters from the marine sponge *Hippospongia lachne*  
**967** // N // hippobutenolide A // IA vs 6 HTCLs.  
**968** // N // hippobutenolide B // IA vs 6 HTCLs.
- 412** Porifera *Oceanapia* sp // Dredge (48 m), Scott Reef, 192 km NNW of Broome, Western Australia // Oceanalin B, a hybrid  $\alpha,\omega$ -bifunctionalized sphingoid tetrahydroisoquinoline  $\beta$ -glycoside from the marine sponge *Oceanapia* sp.  
**969** // N // oceanalin B // weak activ. vs *Candida glabrata*.
- 413** Porifera *Cladocroce* sp // Dredge (245 m), seamount Gonsone, Japan // Structure elucidation of calyxoside B, a bipolar sphingolipid from a marine sponge *Cladocroce* sp. through the use of Beckmann rearrangement  
**970** // N // calyxoside B // IA vs 1 HTCL; Beckmann rearrangement used to ID position of ketone.
- 414** Porifera *Aaptos aaptos* // Vanphong Bay, Nha Trang, Vietnam // Chemical constituents of the marine sponge *Aaptos aaptos* (Schmidt, 1864) and their cytotoxic activity  
**971** // M // 3-([9-methylhexadecyl]oxy)propane-1,2-diol // IA vs 4 HTCLs; known synth. cpd.
- 415** Porifera *Luffariella variabilis* // Yongle Islands, Xisha Islands, South China Sea // One cytotoxic steroid and other two new metabolites from the South China Sea sponge *Luffariella variabilis*  
**972** // N // 1-methoxy-3-hydroxy-4-methyl-5-heptadecylphenol // IA vs 4 HTCLs.
- 416** Porifera *Hippospongia fistulosa* // Van Phong, Nha Trang, Vietnam // A new meroterpene lactone and a new alkyl amino alcohol from the Vietnamese marine sponge *Hippospongia fistulosa* Lendenfeld, 1889  
**973** // N // 2-aminotetradec-13-ene-3,4,5,6,7-pentaol // IA vs 4 HTCLs.
- 417** Porifera *Plakortis symbiotica*, Porifera *Xestospongia deweerdtiae* // Mona Island, Puerto Rico, USA // Plakortinic acids C and D: a pair of peroxide-polyketides possessing a rare 7,8-dioxatricyclo[4.2.2.0<sub>2,5</sub>]dec-9-ene core from a two-sponge association of *Plakortis symbiotica*-*Xestospongia deweerdtiae*  
**974** // N // plakortinic acid C // IA vs NCI 60 CL.  
**975** // N // plakortinic acid D // IA vs NCI 60 CL.
- 418** Porifera *Callyspongia diffusa* // Kadiapattanam coast, India // Callypyrones from marine Callyspongiidae sponge *Callyspongia diffusa*: antihypertensive bis- $\gamma$ -pyrone polypropionates attenuate angiotensin-converting enzyme  
**976** // N // callypyrone A // IA as ACE inhib.  
**977** // N // callypyrone B // IA as ACE inhib.

## 6 Sponges

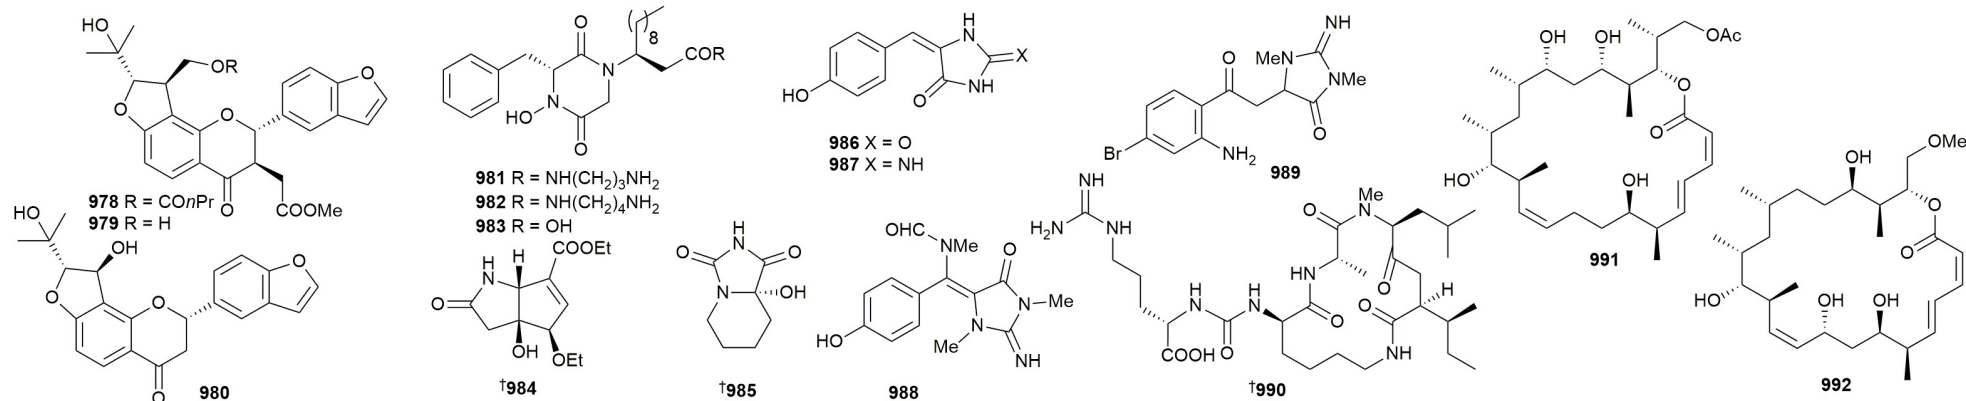

- 419** Porifera *Hyrtios erectus* // Kadiapattanam coast, India // Apoptotic effect of chromanone derivative, hyrtiosone A from marine demosponge *Hyrtios erectus* in hepatocellular carcinoma HepG2 cells  
**978** // N // hyrtiosone A // IA vs antioxid.; IA vs anti-inflam.  
**979** // N // hyrtiosone B // IA vs antioxid.; IA vs anti-inflam.  
**980** // N // hyrtiosone C // IA vs antioxid.; IA vs anti-inflam.
- 420** Porifera *Cliona celata* // Hormuz Island, Iran // Molecular networking-guided isolation of new etzionin-type diketopiperazine hydroxamates from the Persian Gulf sponge *Cliona celata*  
**981** // R // etzionin // IA vs 3 bact. 2 fungi, 3 HTCLs, orig. tunicate comp..  
**982** // N // clioetzionin A // IA vs 3 bact. strains; IA vs 2 fungi; IA vs 3 HTCLs.  
**983** // N // clioetzionin B // IA vs 3 bact. strains; IA vs 2 fungi; IA vs 3 HTCLs.
- 421** Porifera *Aplysina aerophoba*, Porifera *Spongia* sp. // Heraklion, Crete, Greece // Cytotoxic compounds of two demossponges (*Aplysina aerophoba* and *Spongia* sp.) from the Aegean Sea  
**984** // N // iso-subereatensin // IA vs 2 HTCLs.
- 414** Porifera *Aaptos aaptos* // Vanphong Bay, Nha Trang, Vietnam // Chemical constituents of the marine sponge *Aaptos aaptos* (Schmidt, 1864) and their cytotoxic activity  
**985** // N // 5H,7H,9H-9S-hydroxy-imidazo[1,5- $\alpha$ ]pyridine-1,3-dione // IA vs 4 HTCLs.
- 422** Porifera *Hemimycala* sp // Al-lith, Saudi Arabia // Hemimycalins C-E; cytotoxic and antimicrobial alkaloids with hydantoin and 2-iminoimidazolidin-4-one backbones from the Red Sea marine sponge *Hemimycala* sp.  
**986** // N // hemimycalin C // weak inhib. vs 2 of 3 microb. strains.  
**987** // N // hemimycalin D // weak inhib. vs 2 of 3 microb. strains.  
**988** // N // hemimycalin E // weak inhib. vs 2 of 3 microb. strains.
- 423** Porifera *Thorectandra choanoides* // Great Australian Bight // New from old: thorectandrin alkaloids in a Southern Australian Marine sponge, *Thorectandra choanoides* (CMB-01889)  
**989** // N // thorectandrin A // IA vs 2 bact. 1 fungus, 1 HTCL; potential pharmacophore link to IDO.
- 424** Porifera *Homophymia* sp // Dredge (200 m), Sango-Sone, Japan // Homophymamide A, heterodetic cyclic tetrapeptide from a *Homophymia* sp. marine sponge: a cautionary note on configurational assignment of peptides that contain a ureido linkage  
**990** // N // homophymamide A // mod. inhib. vs carboxypeptidase B; total synth. also achieved.
- 425** Porifera *Clathria vulpina* // Kadiapattanam coast, India // Clathrolides A–B: previously undescribed macrocyclic lactones from marine demosponge *Clathria (Thalysias) vulpina* (Lamarck, 1814) as potential antihypertensive leads attenuating angiotensin converting enzyme  
**991** // N // clathrolide A // IA vs antioxid.; IA vs anti-inflam.; IA vs anti-hypertension.  
**992** // N // clathrolide B // IA vs antioxid.; IA vs anti-inflam.; IA vs anti-hypertension.

**Key:** Main article bibliography reference // Taxonomy // Location // Article title  
 Compound number // Status // Compound name // Biological activity and Other information

## 6 Sponges

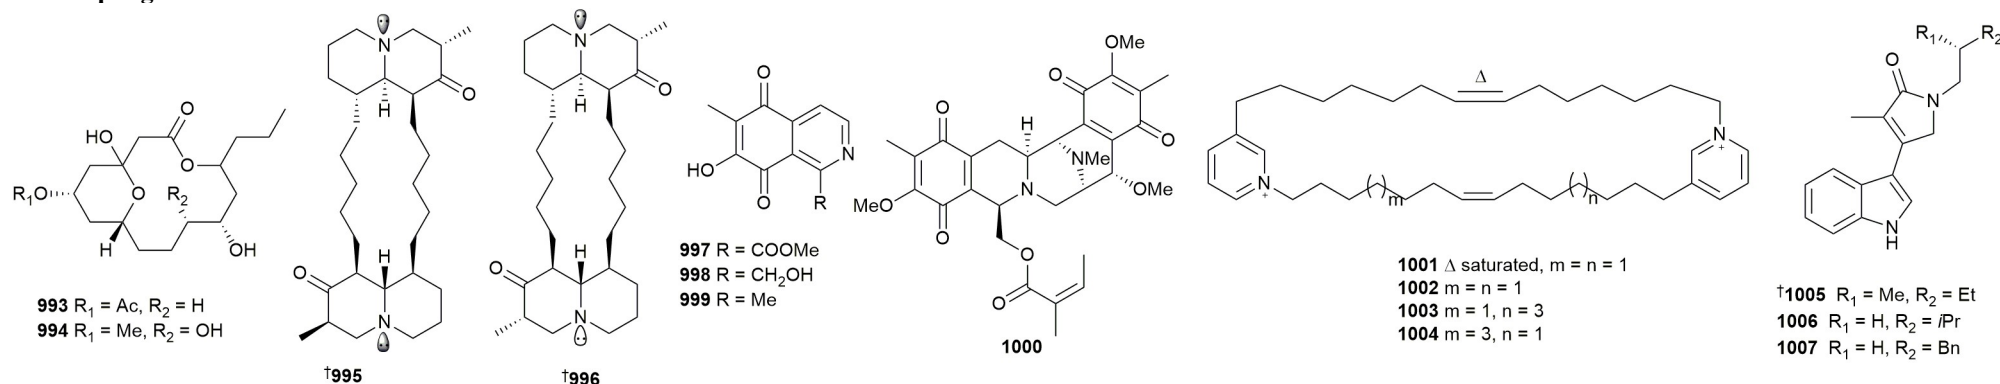

- 426** Porifera *Clathria procera* // Kadiapattanam coast, India // Procerolides A-B from Microcionidae marine sponge *Clathria procera*: anti-inflammatory macrocyclic lactones with selective cyclooxygenase-2 attenuation properties  
**993** // N // procerolide A // name already used; IA vs anti-inflam.  
**994** // N // procerolide B // name already used; IA vs anti-inflam.
- 427** Porifera *Neopetrosia chaliniformis* // Xidao, Hainan Province, China // Uncommon bis-quinolizidine alkaloids from the Hainan sponge *Neopetrosia chaliniformis*  
**995** // N // neopetrosiasin A // IA vs 3 HTCLs.  
**996** // N // neopetrosiasin B // IA vs 3 HTCLs.
- 428** Porifera *Haliclona* sp // Vietnam // Isoquinolinequinone derivatives from a marine sponge (*Haliclona* sp.) regulate inflammation in *in vitro* system of intestine  
**997** // N // methyl *O*-demethylrenierate // IA vs NO, PGE<sub>2</sub>, iNOS, COX-2 and MAPK.  
**998** // N // *O*-demethylrenierol // weak inhib. vs NO, PGE<sub>2</sub>, iNOS, COX-2 and MAPK.  
**999** // N // 1,6-dimethyl-7-hydroxy-5,8-dihydroisoquinoline-5,8-dione // weak inhib. vs NO, PGE<sub>2</sub>, iNOS, COX-2 and MAPK.  
**1000** // N // 21-dehydroxyrenieramycin F // IA vs NO, PGE<sub>2</sub>, iNOS, COX-2 and MAPK.
- 429** Porifera *Neopetrosia chaliniformis* // Mantehage Island, Bunaken National Park, Indonesia // Neopetrosidines A-D, pyridine alkaloids isolated from the marine sponge *Neopetrosia chaliniformis* and their cell cycle elongation activity  
**1001** // N // neopetrosidine A // weak cytotox. vs 1 HTCL; inhib. mitochondrial function and extends cell cycl duration.  
**1002** // N // neopetrosidine B // weak cytotox. vs 1 HTCL.  
**1003** // N // neopetrosidine C // weak cytotox. vs 1 HTCL; insep. mix.  
**1004** // N // neopetrosidine D // weak cytotox. vs 1 HTCL; insep. mix.
- 430** Porifera *Psammocinia* sp // Chuja-do, Jeju Island, South Korea // Psammocindoles A–C: isolation, synthesis, and bioactivity of indole- $\gamma$ -lactams from the sponge *Psammocinia vermis*  
**1005** // N // psammocindole A // weak activ. of adiponectin secretion; total synth. also achieved.  
**1006** // N // psammocindole B // weak activ. of adiponectin secretion; total synth. also achieved.  
**1007** // N // psammocindole C // IA vs adiponectin secretion; total synth. also achieved.

6 Sponges

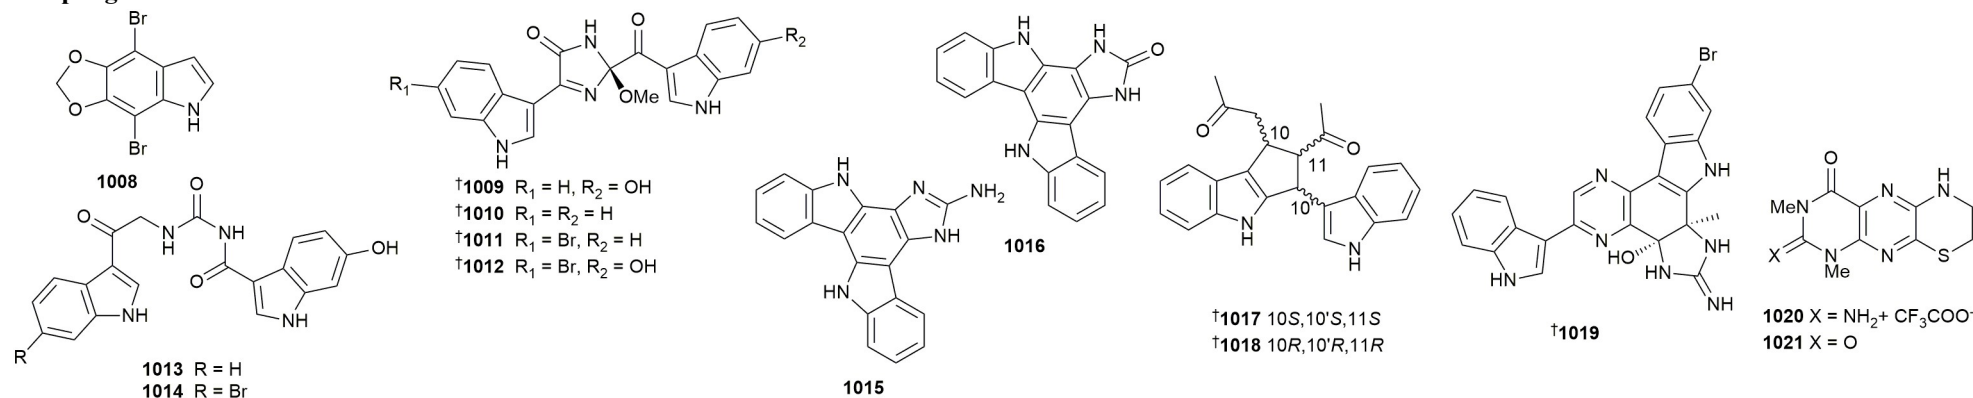

- 431** Porifera *Psammocinia* sp // Amakusa, Kumamoto Prefecture, Japan // Amakusamine from a *Psammocinia* sp. sponge: isolation, synthesis, and SAR study on the inhibition of RANKL-induced formation of multinuclear osteoclasts  
**1008** // N // amakusamine // weak inhib. of osteoclast formation, total synth. also achieved.
- 432** Porifera *Spongosorites* sp // Seogwipo, Jeju Island, Korea // Bioactive bis(indole) alkaloids from a *Spongosorites* sp. sponge  
**1009** // N // spongosoritin A // IA vs 6 bact. strains; IA vs 3 HTCLs.  
**1010** // N // spongosoritin B // IA vs 6 bact. strains; IA vs 3 HTCLs.  
**1011** // N // spongosoritin C // weak activ. vs 1 of 6 bact. strains; IA vs 3 HTCLs.  
**1012** // N // spongosoritin D // weak activ. vs 1 of 6 bact. strains; IA vs 3 HTCLs.  
**1013** // N // spongocarbamide A // IA vs 6 bact. strains; IA vs 3 HTCLs.  
**1014** // N // spongocarbamide B // IA vs 6 bact. strains; IA vs 3 HTCLs.
- 433** Porifera *Damiria* sp // Phuket Island, Thailand // NMR characterization of rearranged staurosporine aglycone analogues from the marine sponge *Damiria* sp.  
**1015** // N // damirine A // weak activ. vs 6 HTCLs.  
**1016** // N // damirine B // NT.
- 434** Porifera *Tedania anhelans* // Cultured, Danzhou, Hainan, China // Racemic bisindole alkaloids: structure, bioactivity, and computational study  
**1017** // N // (+)-spondomine // weak activ. vs 1 of 4 HTCLs; mod. inhib.NF-κB Wnt and HIF1 signalling; IA vs anti-angiogenesis; mod. pro-angiogenesis activ.; total synth. also achieved.  
**1018** // N // (-)-spondomine // weak activ. vs 2 of 4 HTCLs; IA vs NF-κB; weak inhib. Wnt and HIF1 signalling; IA vs anti-angiogenesis; mod. pro-angiogenesis activ.; total synth. also achieved.
- 435** Porifera *Myrmekioderma* sp // Dredge, Sangosone, Japan // Myrindole A, an antimicrobial bis-indole from a marine sponge *Myrmekioderma* sp.  
**1019** // N // myrindole A // IA vs 2 bact. strains.
- 436** Porifera *Tedaniophorbis ceratosis* // Wommin Reef, Northern NSW, Australia // Tedaniophorbins A and B—novel fluorescent pteridine alkaloids incorporating a thiomorpholine from the sponge *Tedaniophorbis ceratosis*  
**1020** // N // tedaniophorbis A // strongly fluorescent with large Stokes shift; IA vs *P. falciparum*, *T. brucei brucei*, 6 HTCLs.  
**1021** // N // tedaniophorbis B // strongly fluorescent with large Stokes shift; IA vs *P. falciparum*, *T. brucei brucei*, 6 HTCLs.

## 6 Sponges

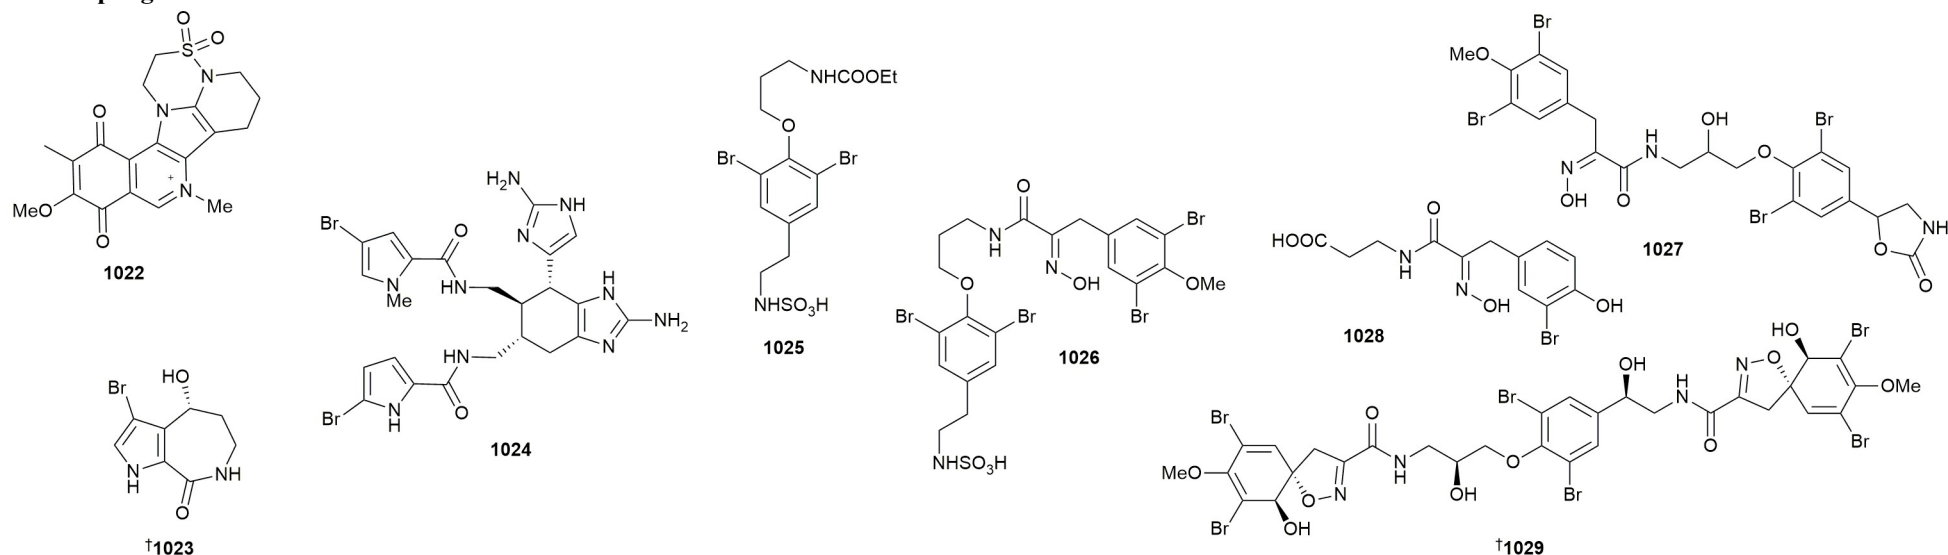

- 437** Porifera *Neopetrosia* sp // Helen Reef, Southwest Islands, Palau // Neopetrothiazide: an intriguing pentacyclic thiazide alkaloid from the sponge *Neopetrosia* sp.  
**1022** // N // neopetrothiazide // first thiazide NP; weak to mod. inhib. vs PAX3-FOXO1-luciferase expression; weak cytotox.
- 438** Porifera *Stylissa massa* // Than-kyune-nge Island, Kawthaung, Tanintharyi Region, Myanmar // Pyrrolactams from marine sponge *Stylissa massa* collected from Myanmar and their anti-Vpr activities  
**1023** // N // stylissaol A // IA vs 1 virus.
- 439** Porifera *Astrosclera willeyana* // Tonga // Agelasin diterpenoids and Cbl-b inhibitory ageliferins from the coralline demosponge *Astrosclera willeyana*  
**1024** // N // N(1)-methylisoageliferin // IA vs Cbl-b ubiquitin ligase.
- 421** Porifera *Aplysina aerophoba*, Porifera *Spongia* sp. // Heraklion, Crete, Greece // Cytotoxic compounds of two demosponges (*Aplysina aerophoba* and *Spongia* sp.) from the Aegean Sea  
**1025** // N // aeroplysinin-3 // NT.  
**1026** // N // aeroplysinin-4 // NT.  
**1027** // N // aeroplysinin-5 // NT.  
**1028** // N // nor-psammaplin M // NT.
- 440** Porifera *Ecionemia acervus* // Vietnam // Stereochemical determination of fistularins isolated from the marine sponge *Ecionemia acervus* and their regulatory effect on intestinal inflammation  
**1029** // N // SR-fistularin-3 // weak inhib. of NO, PGE<sub>2</sub>, iNOS, COX-2.



## 6 Sponges

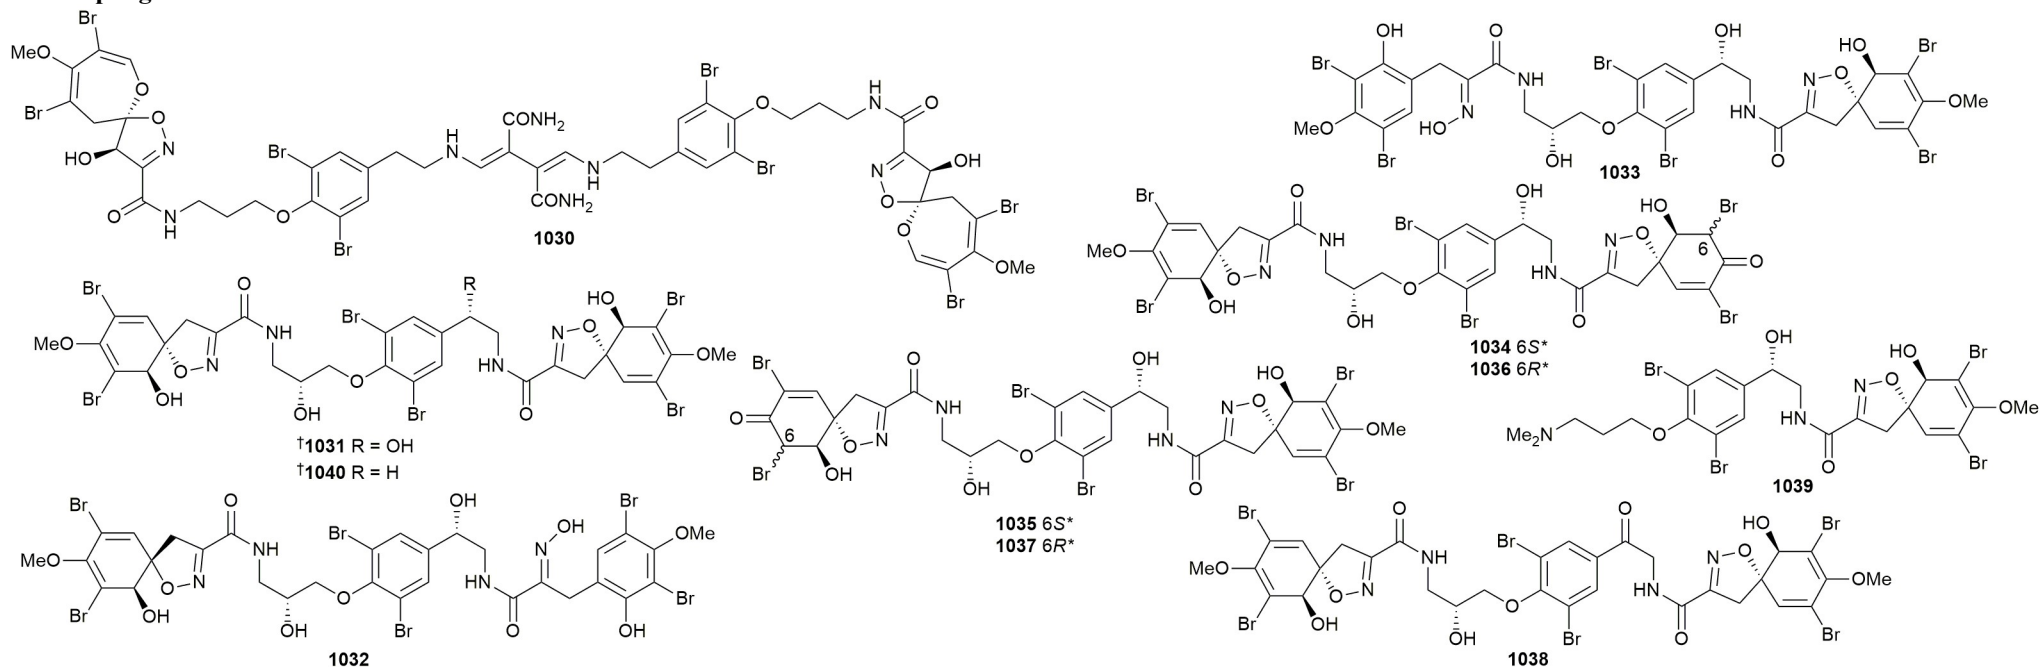

**441** Porifera *Pseudoceratina arabica* // Anas Reef, Obhur, Saudi Arabia // Psammaceratin A: a cytotoxic psammaceratin dimer featuring an unprecedented (2Z,3Z)-2,3-bis(aminomethylene)succinamide backbone from the Red Sea sponge *Pseudoceratina arabica*

**1030** // N // psammaceratin A // weak activ. vs 3 HTCLs.

**442** Porifera *Suberea clavata* // Russell Group, Solomon Islands // Bioactive bromotyrosine derivatives from the Pacific marine sponge *Suberea clavata* (Pulitzer-Finali, 1982)

**1031** // R // 11-*epi*-fistularin 3 // IA vs 6 bact. strains; IA vs AChE.

**1032** // N // suberein-1 // pot. activ. vs 1 of 6 bact. strains; IA vs AChE.

**1033** // N // suberein-2 // pot. activ. vs 2 of 6 bact. strains; IA vs AChE.

**1034** // N // suberein-3 // insep. with **1035**; NT.

**1035** // N // suberein-4 // insep. with **1034**; NT.

**1036** // N // suberein-5 // insep. with **1037**; NT.

**1037** // N // suberein-6 // insep. with **1036**; NT.

**1038** // N // suberein-7 // pot. activ. vs 1 of 6 bact. strains; IA vs AChE.

**1039** // N // suberein-8 // NT.

**1040** // R // 17-deoxy-11-*epi*-fistularin // pot. activ. vs 1 of 6 bact. strains; IA vs AChE.

Key: Main article bibliography reference // Taxonomy // Location // Article title

Compound number // Status // Compound name // Biological activity and Other information

## 6 Sponges

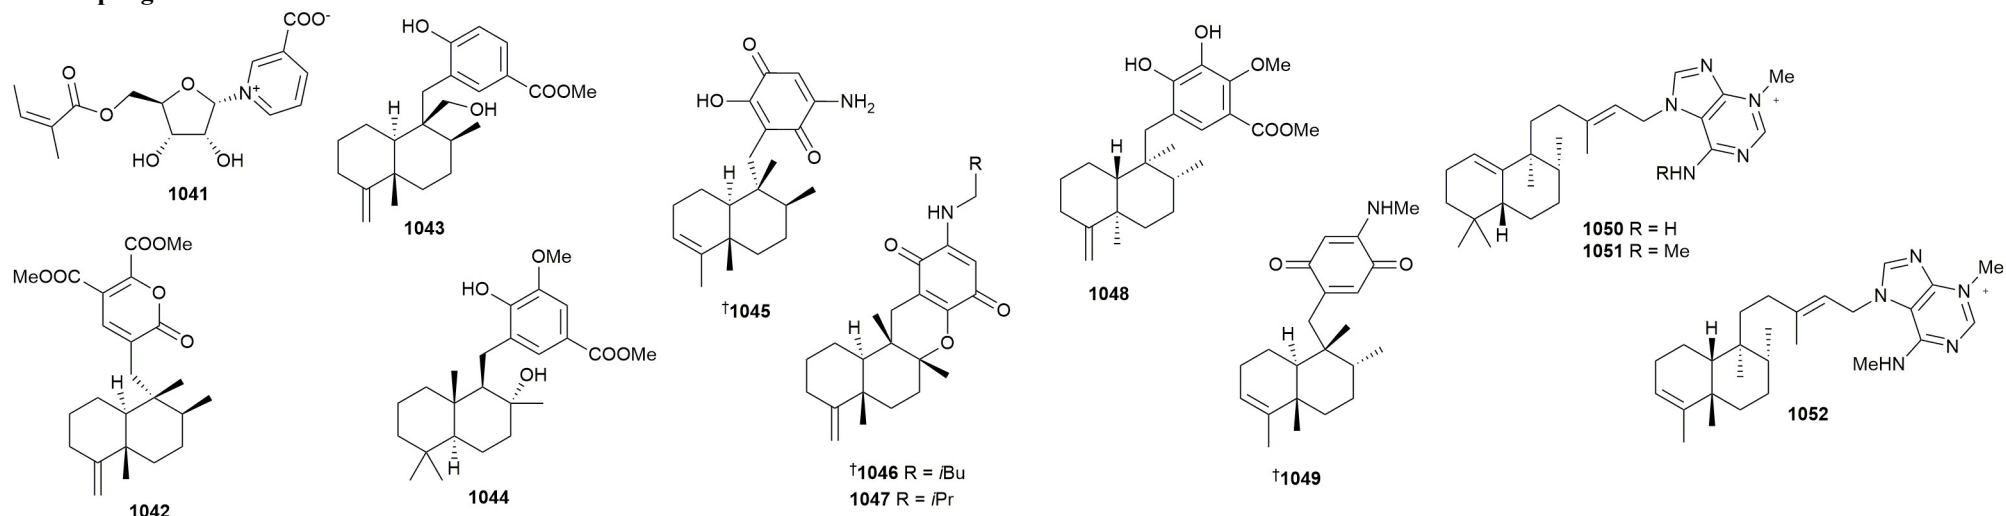

- 443** Porifera *Xestospongia* sp // Xidao Island, Hainan Province, China // Marine alkaloids as the chemical marker for the prey–predator relationship of the sponge *Xestospongia* sp. and the nudibranch *Jorunna funebris*  
**1041** // N // neopetroside C // NT.
- 416** Porifera *Hippospongia fistulosa* // Van Phong, Nha Trang, Vietnam // A new meroterpene lactone and a new alkyl amino alcohol from the Vietnamese marine sponge *Hippospongia fistulosa* Lendenfeld, 1889  
**1042** // N // hippolactone A // IA vs 4 HTCLs.
- 444** Porifera *Hippospongia fistulosa* // Vanphong Bay, Nha Trang, Vietnam // New merosesquiterpenes from the Vietnamese sponge *Hippospongia fistulosa* and their cytotoxic activity  
**1043** // N // hippomeroterpene A // IA vs 4 HTCLs.  
**1044** // N // hippomeroterpene B // IA vs 4 HTCLs.
- 445** Porifera *Dactylospongia metachromia* // Bajotalawaan, North Sulawesi, Indonesia // Fluorescent image-based high-content screening of extracts of natural resources for cell cycle inhibitors and identification of a new sesquiterpene quinone from the sponge, *Dactylospongia metachromia*  
**1045** // N // neoisosmenospongine // weak cell cycle inhib. detected by high content imaging.
- 446** Porifera *Dactylospongia elegans* // Yongxing Island, South China Sea // Cytotoxic meroterpenoids from the marine sponge *Dactylospongia elegans*  
**1046** // N // 20-demethoxy-20-isopentylaminodactyloquinone D // IA vs 4 HTCLs.  
**1047** // N // 20-demethoxy-20-isobutylaminodactyloquinone D // IA vs 4 HTCLs.  
**1048** // N // 19-methoxy-dictyoceratin-A // IA vs 4 HTCLs.
- 447** Porifera *Dysidea* sp // Xisha Islands, South China Sea // Cytotoxic sesquiterpenoid quinones from South China Sea sponge *Dysidea* sp  
**1049** // N // (+)-19-methylaminoavarone // weak activ. vs 1 of 6 HTCLs.
- 439** Porifera *Astrosclera willeyana* // Tonga // Agelasine diterpenoids and Cbl-b inhibitory agelifेरins from the coralline demosponge *Astrosclera willeyana*  
**1050** // N // agelasine W // IA vs Cbl-b ubiquitin ligase.  
**1051** // N // agelasine X // IA vs Cbl-b ubiquitin ligase.  
**1052** // N // agelasine Y // IA vs Cbl-b ubiquitin ligase.

## 6 Sponges

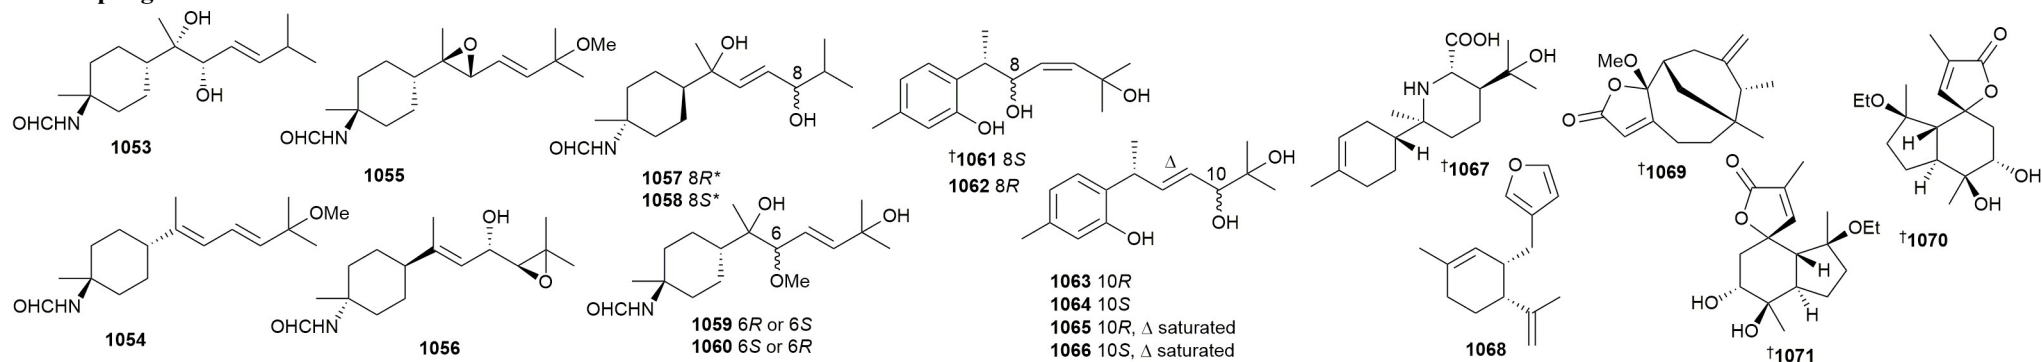

- 448** Porifera *Halichondria* sp // Ximao Island, Hainan Province, China // New formamidobisabolene-type sesquiterpenoids from a Hainan sponge *Halichondria* sp.  
**1053** // N // halichine A // IA vs NO prod.  
**1054** // N // halichine B // IA vs NO prod.  
**1055** // N // halichine C // weak inhib. NO prod.; IA vs 1 hum. CL.  
**1056** // N // ent-axinyssine G // IA vs NO prod.  
**1057** // N // ent-axinyssine J // IA vs NO prod.  
**1058** // N // ent-axinyssine K // IA vs NO prod.  
**1059** // N // halichine D // weak inhib. NO prod.; IA vs 1 hum. CL.  
**1060** // N // halichine E // IA vs NO prod.
- 449** Porifera *Plakortis simplex* // Yongxing Islands, South China Sea // New bisabolane-type phenolic sesquiterpenoids from the marine sponge *Plakortis simplex*  
**1061** // N // plakordioli A // IA vs 2 HTCLs; IA vs 5 microb. strains.  
**1062** // N // plakordioli B // IA vs 2 HTCLs; IA vs 5 microb. strains.  
**1063** // N // plakordioli C // IA vs 2 HTCLs; IA vs 5 microb. strains.  
**1064** // N // plakordioli D // IA vs 2 HTCLs; IA vs 5 microb. strains.  
**1065** // N // (7R,10R)-hydroxycurcudiol // IA vs 2 HTCLs; weak activ. vs 1 of 5 microb. strains.  
**1066** // N // (7R,10S)-hydroxycurcudiol // IA vs 2 HTCLs; weak activ. vs 1 of 5 microb. strains.
- 450** Porifera *Axinyssa* sp // North Sulawesi, Indonesia // Halichonic acid B, a rearranged nitrogenous bisabolene-type sesquiterpene from a marine sponge *Axinyssa* sp.  
**1067** // N // halichonic acid B // IA vs 1 bact. strain.
- 451** Porifera *Ircinia mutans* // Larak Island // Cytotoxic furanosesquiterpenoids and steroids from *Ircinia mutans* sponges  
**1068** // M // furoircin // IA vs 3 HTCLs; known synth.
- 452** Porifera *Lamellodysidea* sp // Manado, Indonesia // Inhibitory effects of sesquiterpene lactones from the Indonesian marine sponge *Lamellodysidea* cf. *herbacea* on bone morphogenetic protein-induced osteoblastic differentiation  
**1069** // N // bicyclolamellolactone A // IA vs BMP phosphatase.
- 453** Porifera *Spongia* sp // Zhanjiang, Guangdong Province, P. R. China // (+)- and (-)-Spongiterpene, a pair of new valerenane sesquiterpene enantiomers from the marine sponge *Spongia* sp.  
**1070** // N // (+)-spongiterpene // IA vs 8 HTCLs; likely artefact; isol. as rac.  
**1071** // N // (-)-spongiterpene // IA vs 8 HTCLs; likely artefact; isol. as rac.

## 6 Sponges

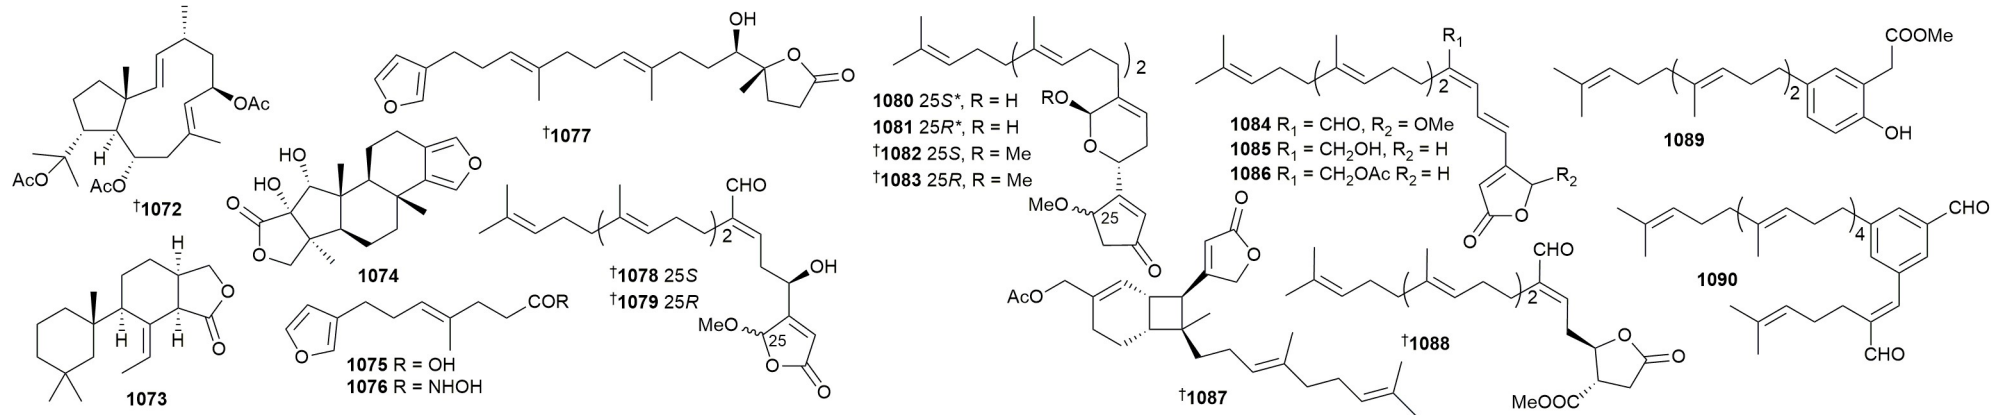

- 415** Porifera *Luffariella variabilis* // Yongle Islands, Xisha Islands, South China Sea // One cytotoxic steroid and other two new metabolites from the South China Sea sponge *Luffariella variabilis*  
**1072** // N // 6,10,18-triacetoxy-2*E*,7*E*-dolabelladien // IA vs 4 HTCLs.
- 454** Porifera *Dendrilla antarctica* // Tierra del Fuego, Antarctica // Antifouling diterpenoids from the sponge *Dendrilla antarctica*  
**1073** // N // 9,11-dihydrogracillinone A // activ. in antifoul. paint assay.
- 455** Porifera *Spongia* sp // Jeddah, Saudi Arabia // An anti-inflammatory 2,4-cyclized-3,4-secospongian diterpenoid and furanoterpene-related metabolites of a marine sponge *Spongia* sp. from the Red Sea  
**1074** // N // 17-dehydroxysonalactone // weak inhib. of superoxide and elastase.  
**1075** // M // spongiafuranic acid A // IA vs superoxide and elastase.  
**1076** // N // spongiafuranohydroxamic acid A // IA vs superoxide and elastase.  
**1077** // N // 16-*epi*-irciformonin G // IA vs superoxide and elastase.
- 456** Porifera *Luffariella variabilis* // Yongle Islands, Xisha Islands, South China Sea // Cytotoxic monoalide-type sesterterpenes from the sponge *Luffariella variabilis* collected in the South China Sea  
**1078** // N // C<sub>26</sub>H<sub>38</sub>O<sub>5</sub> // isol. artefact; weak cytotox. vs 2 of 5 HTCLs.  
**1079** // N // C<sub>26</sub>H<sub>38</sub>O<sub>5</sub> // isol. artefact; weak cytotox. vs 3 of 5 HTCLs.  
**1080** // N // C<sub>27</sub>H<sub>40</sub>O<sub>4</sub> // isol. artefact; weak cytotox. vs 3 of 5 HTCLs.  
**1081** // N // C<sub>27</sub>H<sub>40</sub>O<sub>4</sub> // isol. artefact; weak cytotox. vs 3 of 5 HTCLs.  
**1082** // N // C<sub>28</sub>H<sub>42</sub>O<sub>4</sub> // isol. artefact; weak cytotox. vs 1 of 5 HTCLs.  
**1083** // N // C<sub>28</sub>H<sub>42</sub>O<sub>4</sub> // isol. artefact; weak cytotox. vs 2 of 5 HTCLs.  
**1084** // N // C<sub>26</sub>H<sub>36</sub>O<sub>4</sub> // isol. artefact; isol. as rac; weak cytotox. vs 1 of 5 HTCLs.  
**1085** // N // C<sub>25</sub>H<sub>36</sub>O<sub>3</sub> // NT.  
**1086** // N // C<sub>27</sub>H<sub>38</sub>O<sub>4</sub> // NT.  
**1087** // N // C<sub>27</sub>H<sub>38</sub>O<sub>4</sub> // weak cytotox. vs 1 of 5 HTCLs.  
**1088** // N // C<sub>26</sub>H<sub>38</sub>O<sub>5</sub> // NT.  
**1089** // N // C<sub>25</sub>H<sub>36</sub>O<sub>3</sub> // IA vs 5 HTCLs.  
**1090** // N // C<sub>42</sub>H<sub>60</sub>O<sub>2</sub> // weak cytotox. vs 2 of 5 HTCLs.

**Key:** Main article bibliography reference // Taxonomy // Location // Article title  
 Compound number // Status // Compound name // Biological activity and Other information

## 6 Sponges

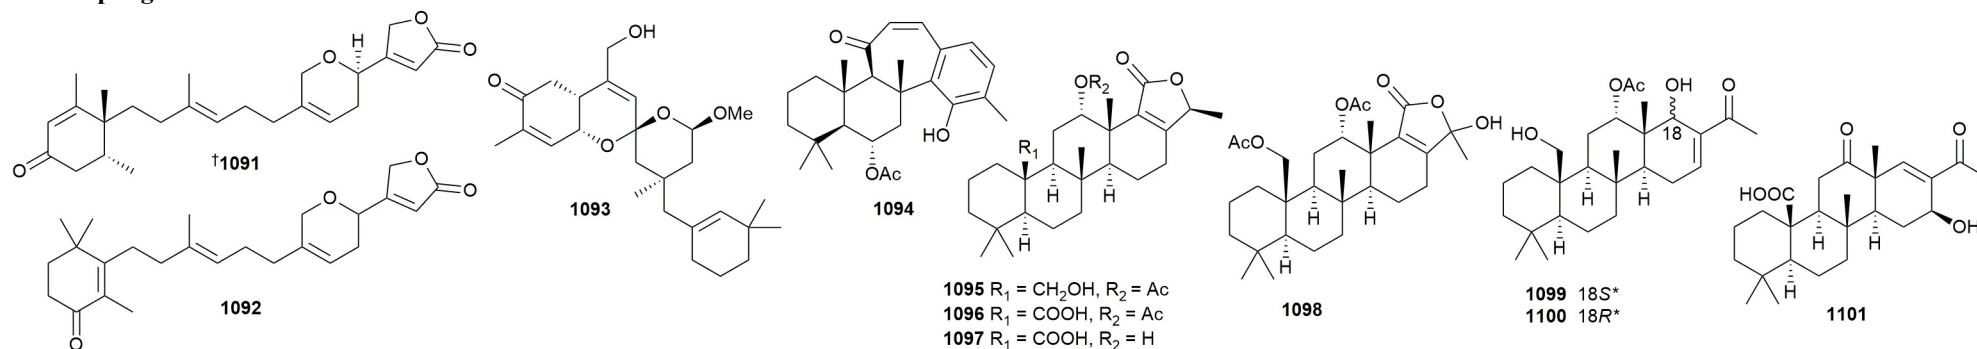

- 457** Porifera *Luffariella* sp // Dredge (180 m), Oshima-shinsono, Japan // Oshimalides A and B, sesterterpenes of the manoalide class from a *Luffariella* sp. deep-sea marine sponge: application of asymmetric dihydroxylation in structure elucidation  
**1091** // N // oshimalide A // IA vs *S. aureus*; rxn with AD-mix used to determ. rel. config.  
**1092** // N // oshimalide B // NT.
- 458** Porifera *Haliclona* sp // Gageo Island, Korea // Structure determination of two new compounds isolated from a marine sponge *Haliclona* (*Gellius*) sp.  
**1093** // N // 13(*R*),16(*R*)-gombaspiroketal // NT.  
**1094** // N // C<sub>26</sub>H<sub>34</sub>O<sub>4</sub> // NT.
- 459** Porifera *Lendenfeldia* sp // Southern Taiwan // Scalarane-type sesterterpenoids from the marine sponge *Lendenfeldia* sp. alleviate inflammation in human neutrophils  
**1095** // N // lendenfeldarane K // mod. inhib. superoxide generation; mod. inhib. elastase.  
**1096** // N // lendenfeldarane L // mod. inhib. superoxide generation; mod. inhib. elastase.  
**1097** // N // lendenfeldarane M // weak inhib. superoxide generation; IA vs elastase.  
**1098** // N // lendenfeldarane N // IA vs superoxide generation; IA vs elastase.  
**1099** // N // lendenfeldarane O // NT.  
**1100** // N // lendenfeldarane P // mod. inhib. superoxide generation; mod. inhib. vs elastase.  
**1101** // N // lendenfeldarane Q // weak inhib. superoxide generation; IA vs elastase.

## 6 Sponges

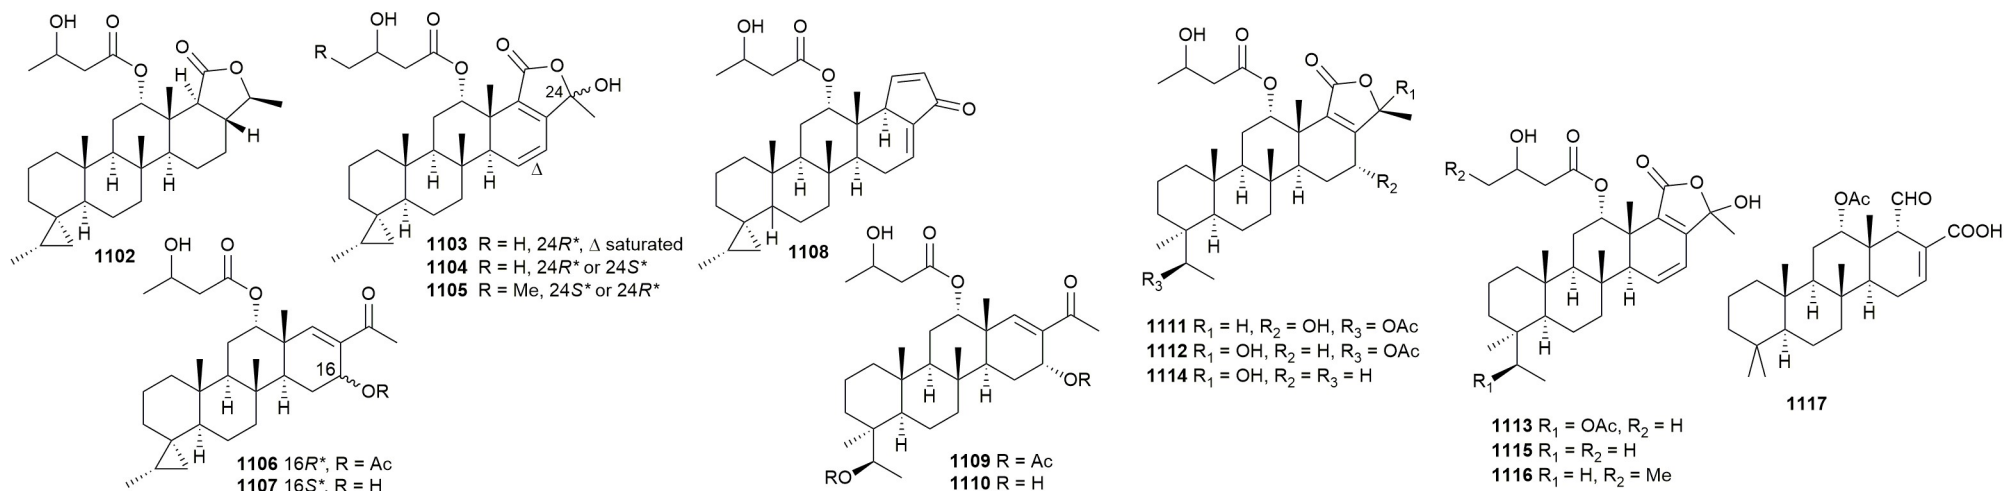

**460** Porifera *Dysidea* sp // Bohol province, Philippines // Isolation of scalarane-type sesterterpenoids from the marine sponge *Dysidea* sp. and stereochemical reassignment of 12-*epi*-phyllactone D/E

**1102** // N // C<sub>31</sub>H<sub>48</sub>O<sub>5</sub> // IA vs 1 HTCL.

**1103** // N // C<sub>31</sub>H<sub>46</sub>O<sub>6</sub> // IA vs 1 HTCL.

**1104** // N // C<sub>31</sub>H<sub>44</sub>O<sub>6</sub> // IA vs 1 HTCL.

**1105** // N // C<sub>32</sub>H<sub>46</sub>O<sub>6</sub> // IA vs 1 HTCL; isol. as mixture.

**1106** // N // C<sub>32</sub>H<sub>48</sub>O<sub>6</sub> // IA vs 1 HTCL; isol. as mixture.

**1107** // N // C<sub>30</sub>H<sub>46</sub>O<sub>5</sub> // IA vs 1 HTCL.

**1108** // N // C<sub>31</sub>H<sub>44</sub>O<sub>4</sub> // weak activ. vs 1 HTCL.

**1109** // N // C<sub>34</sub>H<sub>52</sub>O<sub>8</sub> // IA vs 1 HTCL.

**1110** // N // C<sub>30</sub>H<sub>48</sub>O<sub>6</sub> // IA vs 1 HTCL.

**1111** // N // 16 $\alpha$ -hydroxyhonulactone C // IA vs 1 HTCL.

**1112** // N // 24 $\alpha$ -hydroxyhonulactone C // IA vs 1 HTCL.

**1113** // N // C<sub>33</sub>H<sub>48</sub>O<sub>8</sub> // IA vs 1 HTCL, isol. as mixture.

**1114** // N // 24 $\alpha$ -hydroxyphyllolactone H // IA vs 1 HTCL.

**1115** // N // C<sub>31</sub>H<sub>46</sub>O<sub>6</sub> // IA vs 1 HTCL; isol. as mixture.

**1116** // R // 12-*epi*-phyllactone D/E // IA vs 1 HTCL; isol. as mixture.

**1117** // N // C<sub>27</sub>H<sub>40</sub>O<sub>5</sub> // IA vs 1 HTCL.

## 6 Sponges

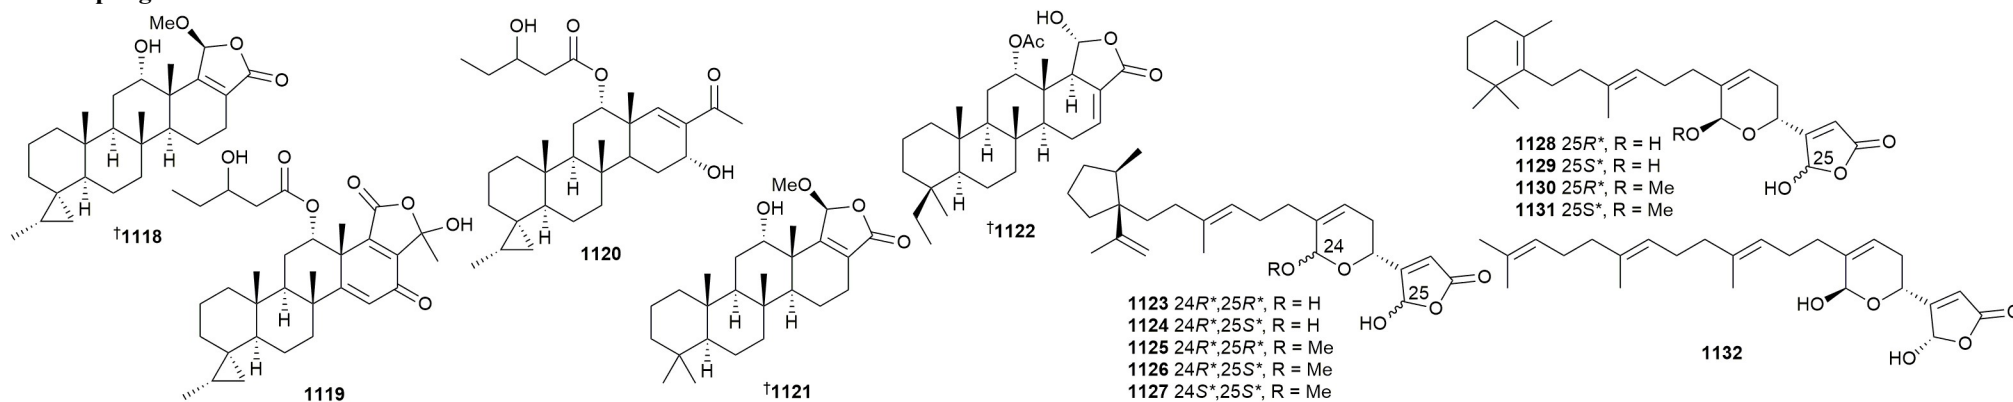

**461** Porifera *Dysidea granulosa* // Xisha Islands, South China Sea // Dysiscalarones A-E, scalarane sesterterpenoids with nitric oxide production inhibitory activity from marine sponge *Dysidea granulosa*

**1118** // N // dysiscalarone A // IA vs NO prod; IA vs 1 HTCL.

**1119** // N // dysiscalarone B // IA vs NO prod; IA vs 1 HTCL.

**1120** // N // dysiscalarone C // IA vs NO prod; IA vs 1 HTCL.

**1121** // N // dysiscalarone D // IA vs NO prod; IA vs 1 HTCL.

**1122** // N // dysiscalarone E // IA vs NO prod; IA vs 1 HTCL.

**464** Porifera *Luffariella* sp // Houwan Bay, Pingtung, Taiwan // The configuration-dependent anti-leukemic effect of manoalide stereoisomers: reignite research interest in these sponge-derived sesterterpenoids

**1123** // R // 24*R*,25*R*-luffariellin A // weak activ. vs 1 of 4 HTCLs.

**1124** // R // 24*R*,25*S*-luffariellin A // weak to mod. activ. vs 4 HTCLs.

**1125** // R // 24*R*-*O*-methyl-25*R*-luffariellin A // weak activ. vs 1 of 4 HTCLs.

**1126** // R // 24*R*-*O*-methyl-25*S*-luffariellin A // weak to mod. activ. vs 4 HTCLs.

**1127** // R // 24*S*-*O*-methyl-25*S*-luffariellin A // weak activ. vs 1 of 4 HTCLs.

**1128** // R // 24*R*,25*R*-manoalide // weak activ. vs 2 of 4 HTCLs.

**1129** // R // 24*R*,25*S*-manoalide // weak to mod. activ. vs 4 HTCLs.

**1130** // R // 24*R*-*O*-methyl-25*R*-manoalide // weak activ. vs 1 of 4 HTCLs.

**1131** // R // 24*R*-*O*-methyl-25*S*-manoalide // weak to mod. activ. vs 4 HTCLs.

**1132** // R // 24*R*,25*S*-thorectolide // IA vs 4 HTCLs.

## 6 Sponges

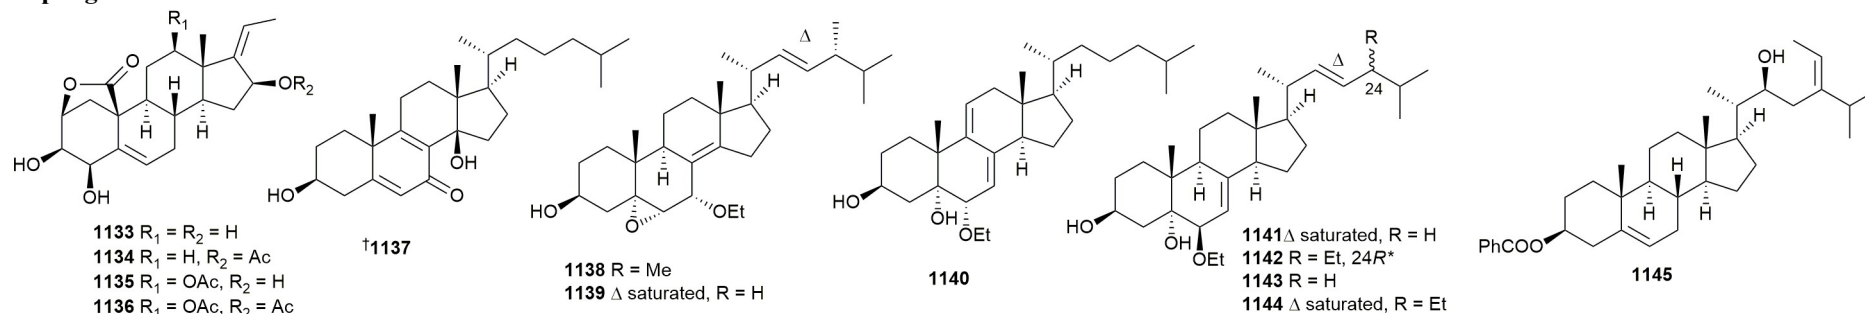

- 465** Porifera *Epipolasis* sp // Tobi Island, Republic of Palau // Four new pregnane-10,2-carbolactones from an *Epipolasis* sp. marine sponge  
**1133** // N // 3β,4β,16β-trihydroxypregna-5,17-diene-10,2-carbolactone // IA vs 2 HTCLs.  
**1134** // N // 16β-acetoxy-3β,4β-dihydroxypregna-5,17-diene-10,2-carbolactone // IA vs 2 HTCLs.  
**1135** // N // 12β-acetoxy-3β,4β,16β-trihydroxypregna-5,17-diene-10,2-carbolactone // IA vs 2 HTCLs.  
**1136** // N // 12β,16β-diacetoxy-3β,4β-dihydroxypregna-5,17-diene-10,2-carbolactone // IA vs 2 HTCLs.
- 466** Porifera *Dysidea avara* // Xisha Islands, South China Sea // New NF-κB inhibitory sterols from the marine sponge *Dysidea avara* collected from the South China Sea  
**1137** // N // (3*S*,14*R*)-3,14-dihydroxycholesta-5,8-dien-7-one // IA vs hum. CL.  
**1138** // N // (22*E*,22*R*)-7α-ethoxy-5α,6α-epoxyergosta-8(14),22-dien-3β-ol // IA vs hum. CL.  
**1139** // N // 3β-hydroxy-7α-ethoxy-5α,6α-epoxy-8(14)-cholestene // IA vs hum. CL.  
**1140** // N // 3β,5α-dihydroxy-6α-ethoxycholesta-7,9(11)-diene // IA vs hum. CL.  
**1141** // N // 3β,5α-dihydroxy-6β-ethoxycholest-7-ene // IA vs hum. CL.  
**1142** // N // (22*E*,24*R*)-24-ethoxy-3β,5α-dihydroxy-6β-ethoxyergosta-7,22-diene // IA vs hum. CL.  
**1143** // N // (22*E*)-3β,5α-dihydroxy-6β-ethoxycholesta-7,22-diene // IA vs hum. CL.  
**1144** // N // 24-ethoxy-3β,5α-dihydroxy-6β-ethoxycholest-7-ene // IA vs hum. CL.
- 467** Porifera *Xestospongia* sp // Kaimana, West Papua, Indonesia // A new antiplasmodial sterol from Indonesian marine sponge, *Xestospongia* sp  
**1145** // N // kaimanol // mod. activ. vs *P. falciparum*.



## 6 Sponges

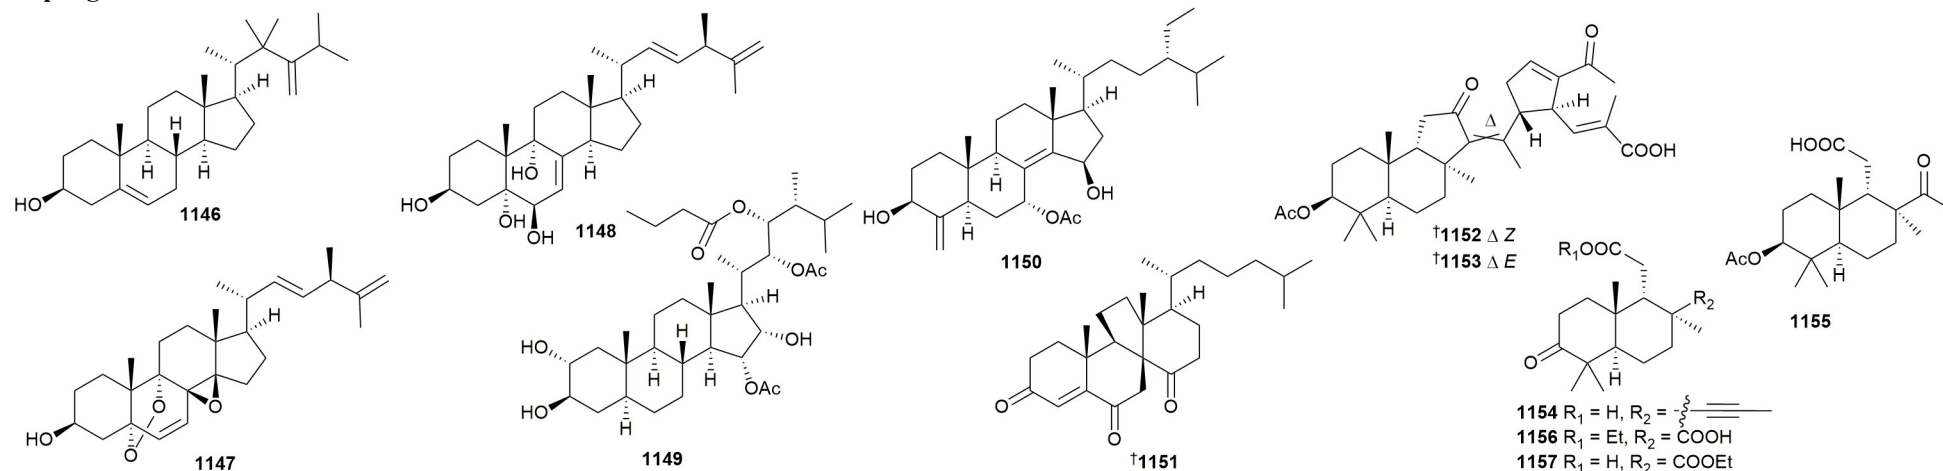

- 468** Porifera *Halichondria* sp // Ximao Island, Hainan Province, China // New sterols from the South China Sea sponges *Halichondria* sp.  
**1146** // N // halichsterol A // IA vs PTP1B; IA vs 3 HTCLs.  
**1147** // N // halichsterol B // weak inhib. NO prod; IA vs PTP1B; IA vs 3 HTCLs.  
**1148** // N // halichsterol C // IA vs PTP1B; IA vs 3 HTCLs.
- 469** Porifera *Echinoclathria* sp // Safaga, Egyptian Red Sea // New glucose-6-phosphate dehydrogenase inhibitor from the Red Sea sponge *Echinoclathria* sp.  
**1149** // N // echinosterol // weak activ. vs 1 of 3 HTCLs.
- 470** Porifera *Theonella* sp // Kenting, Pingtung, Taiwan // Anti-proliferative potential of secondary metabolites from the marine sponge *Theonella* sp.: moving from correlation toward causation  
**1150** // N // theonellasterol L // IA vs 7 HTCLs.
- 415** Porifera *Luffariella variabilis* // Yongle Islands, Xisha Islands, South China Sea // One cytotoxic steroid and other two new metabolites from the South China Sea sponge *Luffariella variabilis*  
**1151** // N // 22,23-dihydro-24-nordankasterone A // weak activ. vs 2 of 4 HTCLs.
- 471** Porifera *Stelletta* sp // Cham Island, South China Sea // New isomalabaricane-derived metabolites from a *Stelletta* sp. marine sponge  
**1152** // N // stellettin Q // NT.  
**1153** // N // stellettin R // NT.  
**1154** // N // stellettin S // NT.  
**1155** // N // stellettin T // NT.  
**1156** // N // stellettin U // NT.  
**1157** // N // stellettin V // NT.

## 6 Sponges

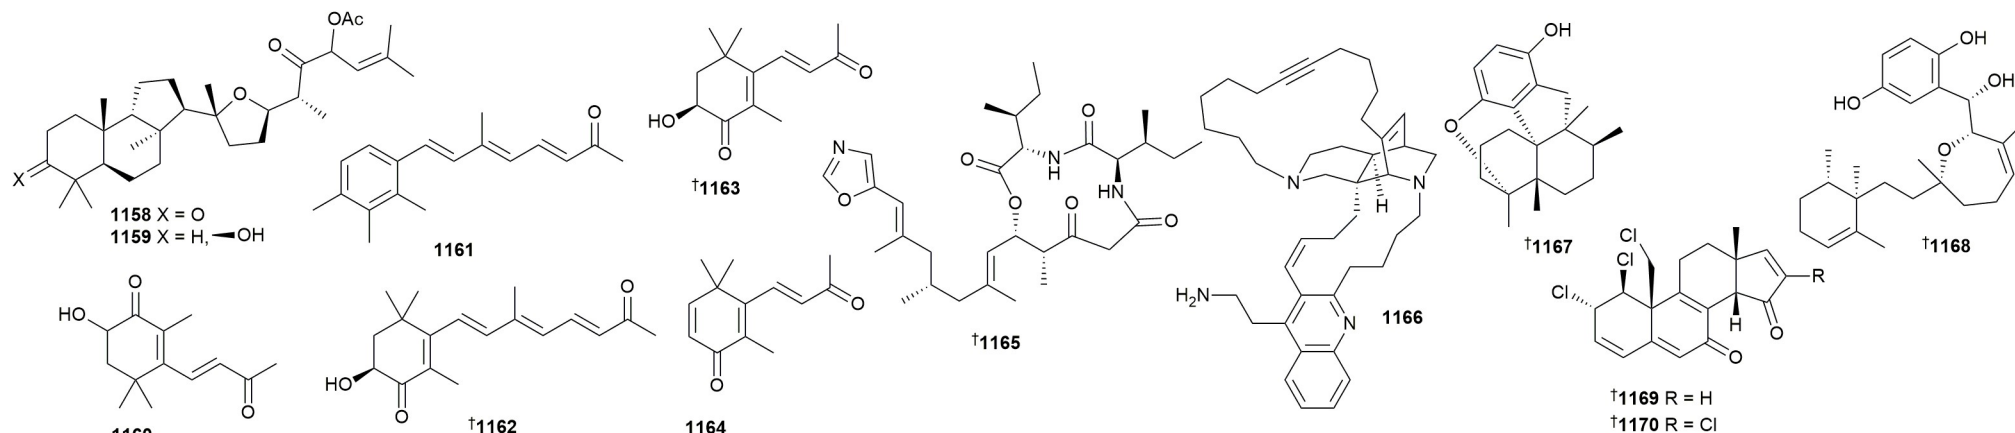

- 472** Porifera *Rhabdastrella* sp // Kenting, Pingtung, Taiwan // Isomalabaricane triterpenes from the marine sponge *Rhabdastrella* sp.  
**1158** // N // rhabdastin H // IA vs 4 HTCLs.  
**1159** // N // rhabdastin I // IA vs 4 HTCLs.
- 473** Porifera *Negombata magnifica* // Red Sea // Magnificines A and B, antimicrobial marine alkaloids featuring a tetrahydrooxazolo[3,2-a]azepine-2,5(3H,6H)-dione backbone from the Red Sea sponge *Negombata magnifica*  
**1160** // M // (±)-negombaionone // weak activ. vs 1 of 3 bact. strains.
- 474** Porifera *Clathria reinwardti* // Vanphong Bay, Nha Trang, Vietnam // Conjugated polyene ketones from the marine sponge *Clathria (Thalysias) Reinwardti* (Vosmaer, 1880) and their cytotoxic activity  
**1161** // N // clathriarein A // IA vs 5 HTCLs.  
**1162** // M // 13-apoastaxanthinone // IA vs 5 HTCLs.  
**1163** // M // 9-apoastaxanthinone // IA vs 5 HTCLs.  
**1164** // M // 2,3-dehydro-4-oxo-β-ionone // IA vs 5 HTCLs.
- 480** Porifera // \* // Asymmetric total synthesis and revision of absolute stereochemistry for (+)-taumycin A: an approach that exploits orthogonally protected quasisenantiomers  
**1165** // R // (+)-taumycin A // rev. by total synth.
- 484** Porifera // \* // A unified approach to polycyclic alkaloids of the ingenamine estate: total syntheses of keramaphidin B, ingenamine, and nominal njaoamine I  
**1166** // R // njaoamine I // rev. by total synth.
- 491** Porifera // \* // Enantioselective total synthesis and structural revision of dysiherbol A  
**1167** // R // dysiherbol A // rev. by total synth.
- 494** Porifera *Haliclona* sp // \* // total synthesis and structure revision of halioxepine  
**1168** // R // (+)-halioxepine // rev. by total synth.
- 497** Porifera // \* // Asymmetric total synthesis of clionastatins A and B  
**1169** // R // clionastatin A // rev. by total synth.  
**1170** // R // clionastatin B // rev. by total synth.

## 7 Cnidaria

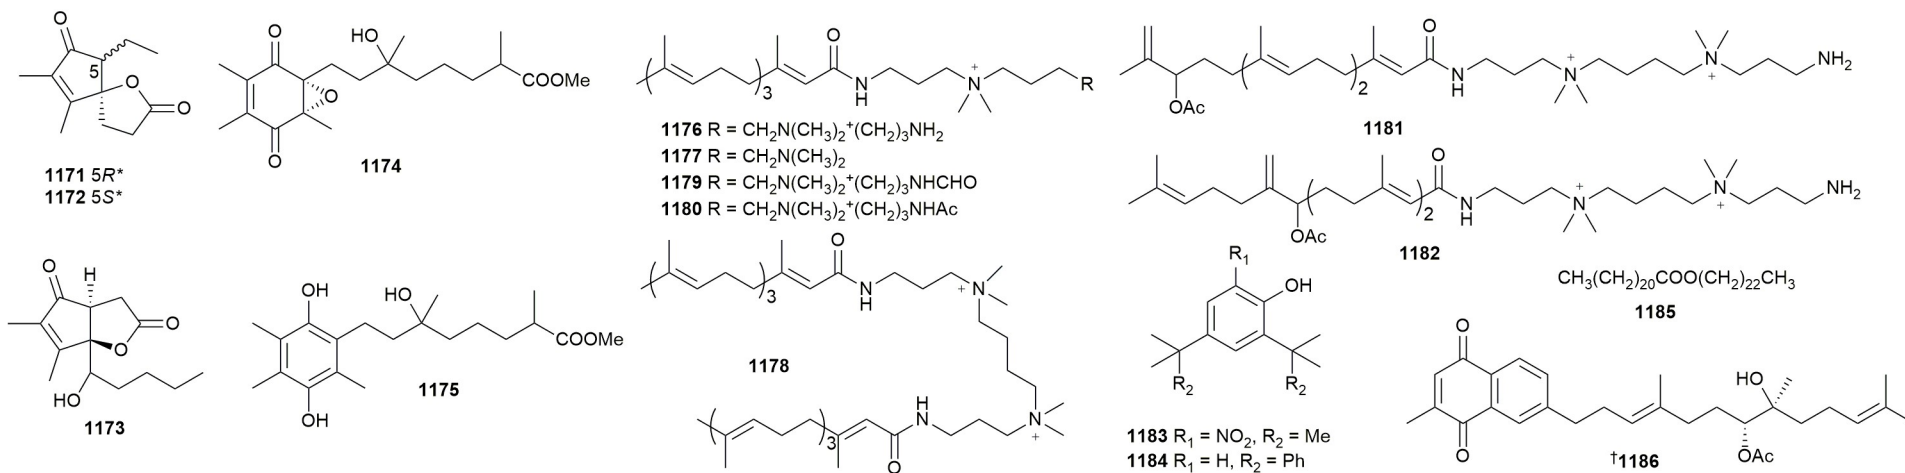

- 527** Cnidaria *Dendronephthya mucronata* // Phu Quoc Island, Kiengiang, Vietnam // Bicyclic lactones from the octocoral *Dendronephthya mucronata*  
**1171** // N // dendronephthyone A // IA vs 3 HTCLs.  
**1172** // N // dendronephthyone B // IA vs 3 HTCLs.  
**1173** // N // dendronephthyone C // IA vs 3 HTCLs.
- 528** Cnidaria *Sinularia scabra* // Pingtung, southern Taiwan // Quinone derivatives from the soft coral *Sinularia scabra*  
**1174** // N // 1',2'-epoxyflexibilisquinone // IA vs 4 HTCLs.
- 529** Cnidaria *Sarcophyton tenuispiculatum* // Southern Taiwan // New hydroquinone monoterpenoid and cembranoid-related metabolites from the soft coral *Sarcophyton tenuispiculatum*  
**1175** // N // sarcotenuhydroquinone // IA vs 4 HTCLs; IA vs anti-inflam.
- 530** Cnidaria *Sinularia* sp // Palau // Sinularamides A–G, terpenoid-derived spermidine and spermine conjugates with casitas B-lineage lymphoma proto-oncogene B (Cbl-b) inhibitory activities from a *Sinularia* sp. soft coral  
**1176** // M // sinularamide A // unspecified activity towards Cbl-b.  
**1177** // N // sinularamide B // unspecified activity towards Cbl-b.  
**1178** // N // sinularamide C // weak inhib. Cbl-b.  
**1179** // N // sinularamide D // unspecified activity towards Cbl-b.  
**1180** // N // sinularamide E // unspecified activity towards Cbl-b.  
**1181** // N // sinularamide F // unspecified activity towards Cbl-b.  
**1182** // N // sinularamide G // unspecified activity towards Cbl-b.
- 531** Cnidaria *Sarcophyton trocheliophorum* // Red Sea, Hurghada, Egypt // New naturally occurring compounds from *Sarcophyton trocheliophorum*  
**1183** // M // 2,4-di-tert-butyl-6-nitro-phenol // IA vs 7 microb. strains.  
**1184** // M // 2,4-bis(1-methyl-1-phenylethyl)-phenol // IA vs 7 microb. strains.  
**1185** // M // tricosyldocosanoate // IA vs 7 microb. strains.
- 532** Cnidaria *Nephthea chabrolii* // \* // total synthesis of enantiopure chabrolonaphthoquinone B via a stereoselective Julia-Kocienski olefination  
**1186** // R // chabrolonaphthoquinone B // abs. config. by synth.

7 **Cnidaria**

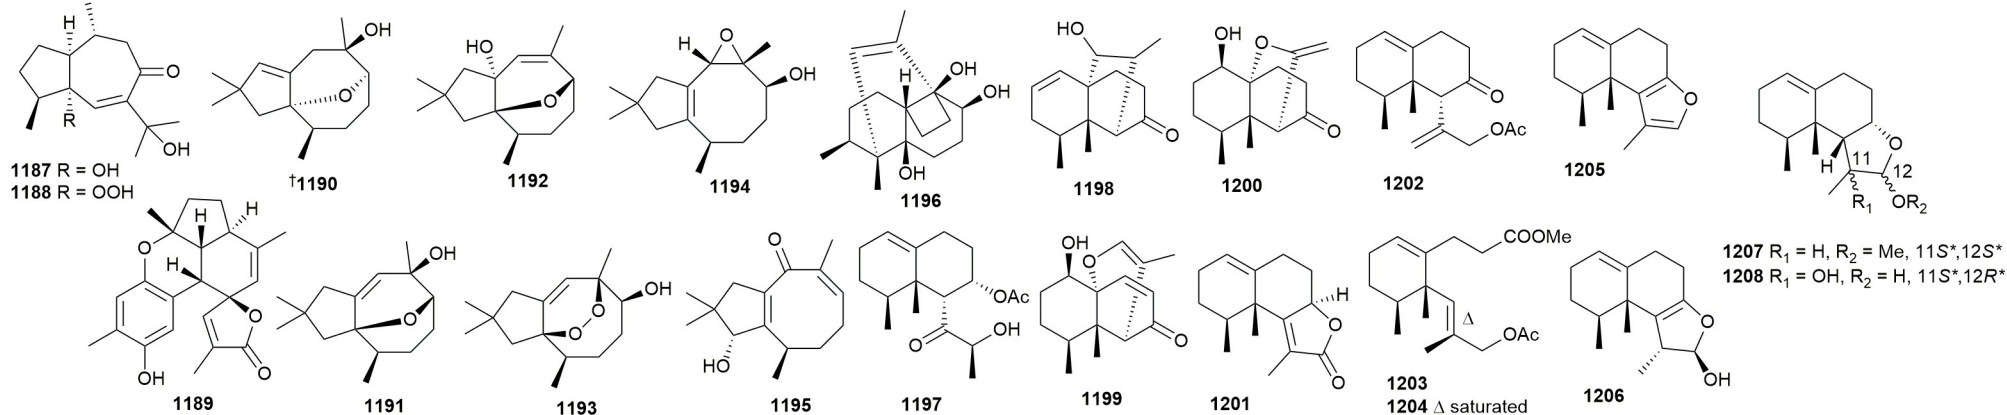

**534** Cnidaria *Sarcophyton glaucum* // Red Sea // Calamusins J-K: new anti-angiogenic sesquiterpenes from *Sarcophyton glaucum*

**1187** // N // calamusin J // pot. inhib. VEGFR2; IA vs 2 HTCLs.

**1188** // N // calamusin K // pot. inhib. VEGFR2; IA vs 2 HTCLs.

**535** Cnidaria *Simularia humesi* // Ximao Island, South China Sea, China // Uncommon polycyclic merosesquiterpenoids and asteriscanoids from the Hainan soft coral *Simularia humesi*

**1189** // M // ( $\pm$ )-9-*epi*-verrubenzospirolactone // IA vs TCLs, antimicrob., anti-inflam.; Rac.; XRD.

**1190** // N // sinuhumesin A // IA vs TCLs, antimicrob.; anti-inflam.; XRD.

**1191** // N // sinuhumesin B // IA vs TCLs, antimicrob.; anti-inflam.

**1192** // N // sinuhumesin C // IA vs TCLs, antimicrob.; anti-inflam.

**1193** // N // sinuhumesin D // IA vs TCLs, antimicrob.; anti-inflam.

**1194** // N // sinuhumesin E // IA vs TCLs, antimicrob.; anti-inflam.

**1195** // N // sinuhumesin F // IA vs TCLs, antimicrob.; anti-inflam.

**536** Cnidaria *Lemnalia* sp // Yongxing Island, South China Sea // Lemnardosinanes A-I: new bioactive sesquiterpenoids from soft coral *Lemnalia* sp.

**1196** // N // lemnardosinane A // weak promotor angiogenesis; IA vs 1 virus strain.

**1197** // N // lemnardosinane B // IA vs angiogenesis; IA vs 1 virus strain.

**1198** // N // lemnardosinane C // IA vs angiogenesis; IA vs 1 virus strain.

**1199** // N // lemnardosinane D // IA vs angiogenesis; IA vs 1 virus strain.

**1200** // N // lemnardosinane E // IA vs angiogenesis; IA vs 1 virus strain.

**1201** // N // lemnardosinane F // IA vs angiogenesis; IA vs 1 virus strain.

**1202** // N // lemnardosinane G // IA vs angiogenesis; IA vs 1 virus strain.

**1203** // N // lemnardosinane H // IA vs angiogenesis; IA vs 1 virus strain.

**1204** // N // lemnardosinane I // IA vs angiogenesis; IA vs 1 virus strain.

**537** Cnidaria *Litophyton nigrum* // Xisha Islands, Hainan Province, China // Further new nardosinane-type sesquiterpenoids from the Xisha soft coral *Litophyton nigrum*

**1205** // N // linardosinene D // IA inhib. bromodomain-containing protein 4; IA towards various undisclosed assays.

**1206** // N // linardosinene E // IA inhib. bromodomain-containing protein 4; IA towards various undisclosed assays.

**1207** // N // linardosinene F // IA inhib. bromodomain-containing protein 4; IA towards various undisclosed assays.

**1208** // N // linardosinene G // IA inhib. bromodomain-containing protein 4; IA towards various undisclosed assays.

## 7 Cnidaria

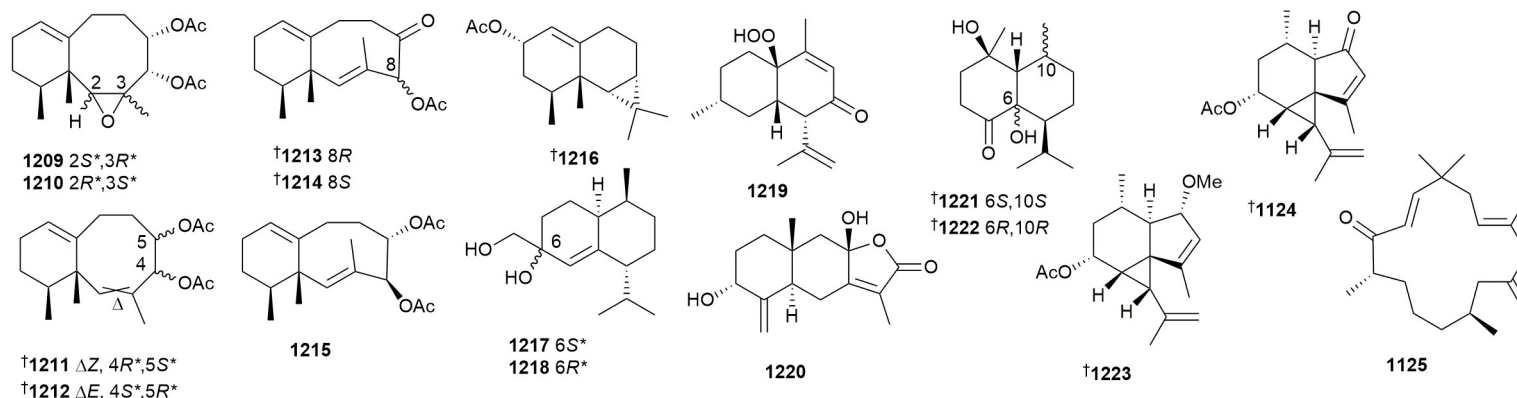

- 538** Cnidaria *Paralemnalia thyrsoides* // Hurghada, Egypt // Paralemnolins X and Y, new antimicrobial sesquiterpenoids from the soft coral *Paralemnalia thyrsoide*  
**1209** // N // paralemnolin X // mod. activ. vs *S. aureus*.  
**1210** // N // paralemnolin Y // mod. activ. vs *S. aureus*.
- 539** Cnidaria *Lemnalia* sp // Yongxing island, South China Sea // Sesquiterpenoids from the soft coral *Lemnalia* sp.  
**1211** // N // lemnolin A // IA vs 1 virus strain.  
**1212** // N // lemnolin B // IA vs 1 virus strain.
- 540** Cnidaria *Lemnalia* sp // Xisha Islands, South China Sea // Antimicrobial terpenoids from South China Sea soft coral *Lemnalia* sp.  
**1213** // N // lineolemnene E // IA vs 2 bact. strains; IA vs 2 virus strains.  
**1214** // N // lineolemnene F // IA to weak inhib. vs 2 virus strains.  
**1215** // N // lineolemnene G // IA vs 2 bact. strains; IA vs 2 virus strains.  
**1216** // N // 2-acetoxy-aristolane // IA vs 2 bact. strains; IA vs 2 virus strains.
- 541** Cnidaria *Cespitularia* sp // Green Island, Southeastern Taiwan // Bioactive diterpenes, norditerpenes, and sesquiterpenes from a Formosan soft coral *Cespitularia* sp.  
**1217** // N // cespilin A // IA vs anti-inflam.  
**1218** // N // cespilin B // IA vs anti-inflam.  
**1219** // N // cespilin C // IA vs anti-inflam.  
**1220** // N // cespitulolide // IA vs anti-inflam.
- 542** Cnidaria *Simularia brassica* // Van Phong bay, Khanh Hoa province, Vietnam // Isolation of sesquiterpenoids and steroids from the soft coral *Simularia brassica* and determination of their absolute configuration  
**1221** // N // sinulaketol A // IA vs *L. donovani*; IA vs 2 bact. and 1 fungal strain.  
**1222** // N // sinulaketol B // IA vs *L. donovani*; IA vs 2 bact. and 1 fungal strain.
- 543** undescribed soft coral // \* // asymmetric total synthesis of shagenes A and B  
**1223** // R // shagene A // abs. config. by synth.  
**1224** // R // shagene B // abs. config. by synth.
- 547** Cnidaria *Bebryce grandis* // Ocean Cay, Bahamas // Antiplasmodial compounds from deep-water marine invertebrates  
**1225** // N // bebrycin A // weak activ. vs *P. falciparum*.

7 Cnidaria

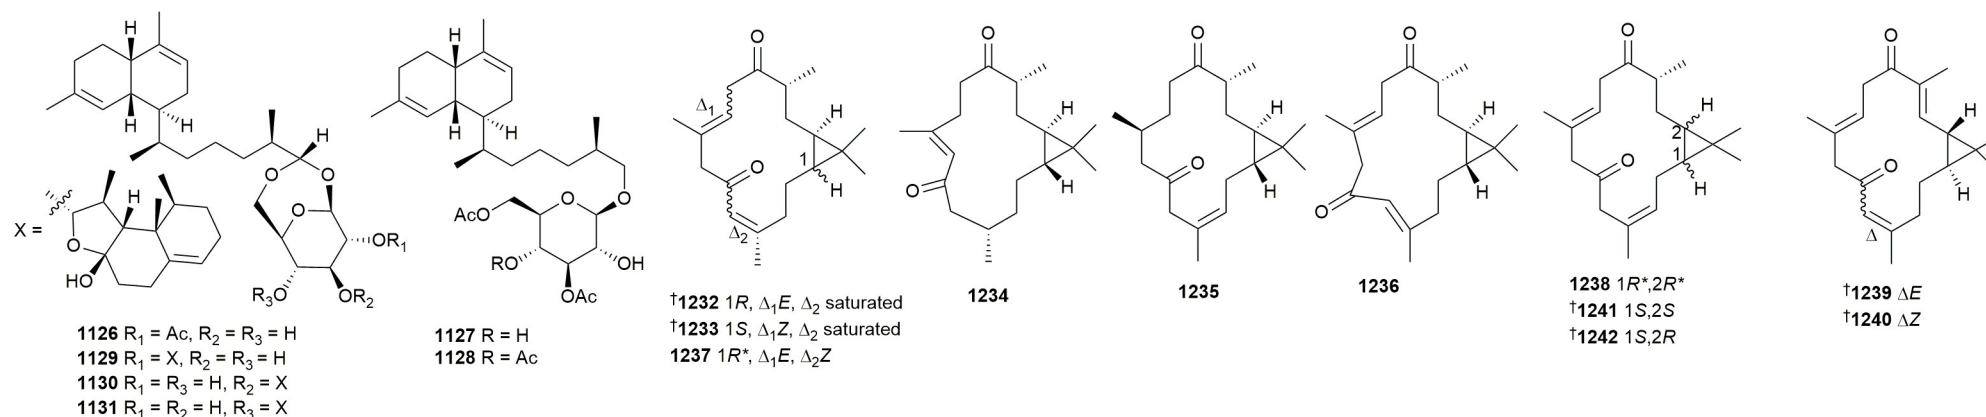

**548** Cnidaria *Lemnalia bournei* // Xisha Island, South China Sea // Six new diterpene glycosides from the soft coral *Lemnalia bournei*

- 1226** // N // lemnabourside E // weak vs 2 bact. strains; IA vs 1 HTCL; IA vs NO prod.  
**1227** // N // lemnabourside F // weak vs 2 bact. strains; IA vs 1 HTCL; IA vs NO prod.  
**1228** // N // lemnabourside G // IA vs 2 bact. strains; IA vs 1 HTCL; IA vs NO prod.  
**1229** // N // lemnadiolbourside A // IA vs 2 bact. strains; IA vs 1 HTCL; IA vs NO prod.  
**1230** // N // lemnadiolbourside B // IA vs 2 bact. strains; IA vs 1 HTCL; IA vs NO prod.  
**1231** // N // lemnadiolbourside C // IA vs 2 bact. strains; IA vs 1 HTCL; IA vs NO prod.

**549** Cnidaria *Simularia crassa* // Ximao Island, Hainan Province, China // Sinucrassins A-K, casbane-type diterpenoids from the South China Sea soft coral *Simularia crassa*

- 1232** // N // sinucrassin A // IA vs  $\alpha$ -glucosidase and DPP-4; XRD.  
**1233** // N // sinucrassin B // IA vs  $\alpha$ -glucosidase and DPP-4; XRD.  
**1234** // N // sinucrassin C // IA vs  $\alpha$ -glucosidase and DPP-4.  
**1235** // N // sinucrassin D // IA vs  $\alpha$ -glucosidase and DPP-4.  
**1236** // N // sinucrassin E // IA vs  $\alpha$ -glucosidase and DPP-4.  
**1237** // N // sinucrassin F // IA vs  $\alpha$ -glucosidase and DPP-4.  
**1238** // N // sinucrassin G // IA vs  $\alpha$ -glucosidase and DPP-4.  
**1239** // N // sinucrassin H // IA vs  $\alpha$ -glucosidase and DPP-4.  
**1240** // N // sinucrassin I // IA vs  $\alpha$ -glucosidase and DPP-4.  
**1241** // N // sinucrassin J // IA vs  $\alpha$ -glucosidase and DPP-4.  
**1242** // N // sinucrassin K // IA vs  $\alpha$ -glucosidase and DPP-4.

## 7 Cnidaria

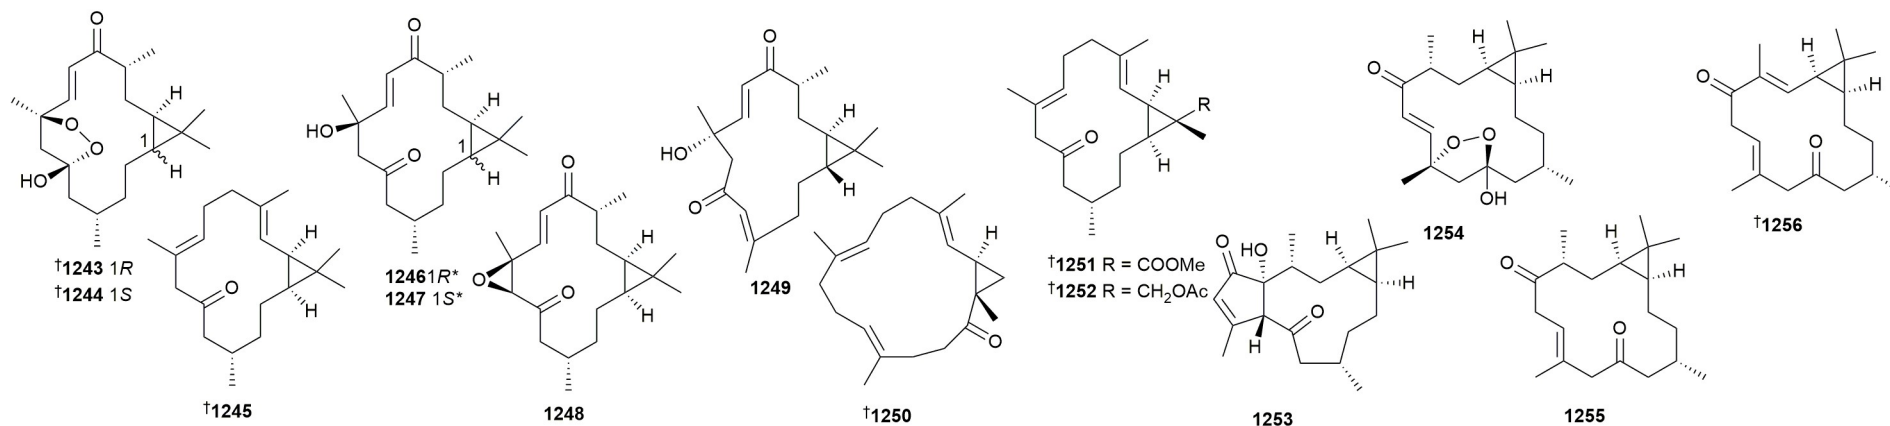

- 550** Cnidaria *Simularia erecta* // Ximao Island, Hainan Province, China // Unusual polyoxygenated casbane diterpenoids from the South China Sea soft coral *Simularia erecta*  
**1243** // N // sinuereperoxide B // NT; XRD.  
**1244** // N // sinuereperoxide C // NT; XRD.  
**1245** // N // 5-deoxy-10-oxo-11,12-dihydrodepressin // NT; XRD.  
**1246** // N // sinueracasbanone A // NT.  
**1247** // N // sinueracasbanone B // NT.  
**1248** // N // sinueracasbanone C // NT.  
**1249** // N // sinueracasbanone D // weak activ. vs anti-inflam.
- 551** Cnidaria *Simularia nanolobata* // West Island, South China Sea, China // Sinunanolobatone A, an anti-inflammatory diterpenoid with bicyclo[13.1.0]pentadecane carbon scaffold, and related casbanes from the Sanya soft coral *Simularia nanolobata*  
**1250** // N // sinunanolobatone A // weak activ. vs anti-inflam.  
**1251** // N // C<sub>21</sub>H<sub>32</sub>O<sub>3</sub> // NT; XRD.  
**1252** // N // C<sub>22</sub>H<sub>34</sub>O<sub>3</sub> // IA vs anti-inflam.
- 552** Cnidaria *Simularia erecta* // Ximao Island, Hainan province, China // Sinueretone A, a diterpenoid with unprecedented tricyclo[12.1.0.05,9]pentadecane carbon scaffold from the South China Sea soft coral *Simularia erecta*  
**1253** // N // sinueretone A // IA vs anti-inflam.  
**1254** // N // sinuereperoxide A // IA vs anti-inflam.; XRD.  
**1255** // N // 10-oxo-3,4,11,12-tetrahydrodepressin // NT; XRD.  
**1256** // R // 10-oxo-11,12-dihydrodepressin // NT; XRD.

7 Cnidaria

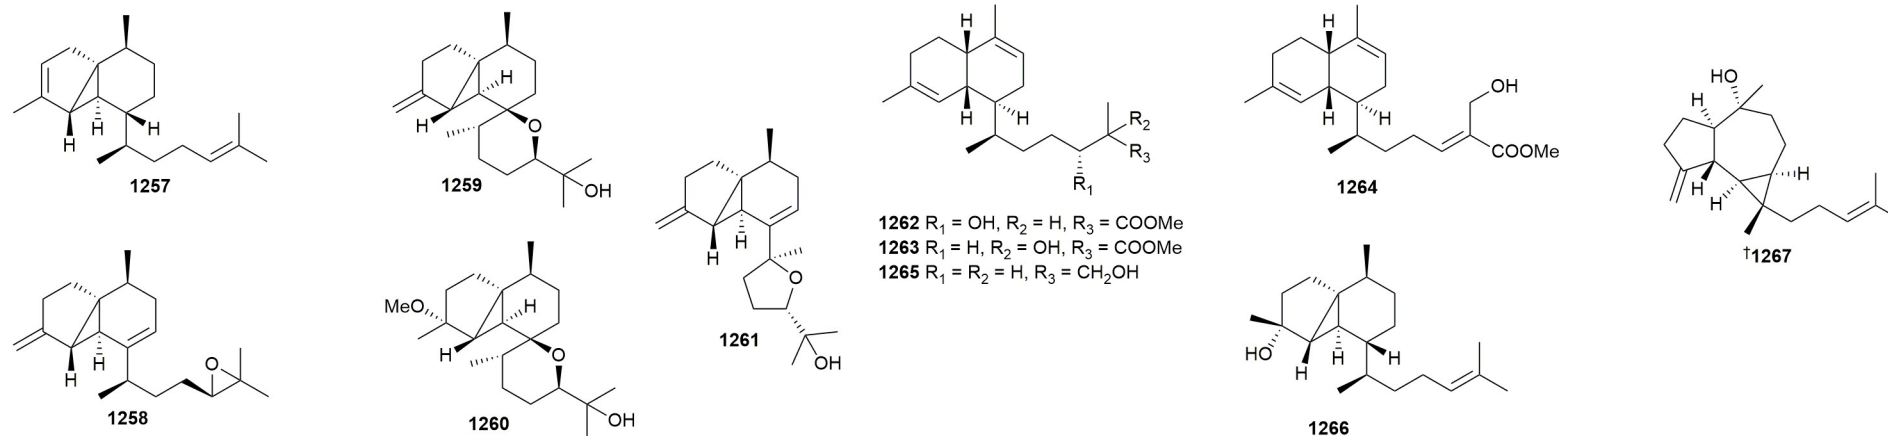

**553** Cnidaria *Litophyton setoensis* // Singaraja, Bali Island, Indonesia // Litosetoenins A–E, diterpenoids from the soft coral *Litophyton setoensis*, backbone-rearranged through divergent cyclization achieved by epoxide reactivity inversion

**1257** // N // litosetoenin A // IA vs 4 HTCLs.

**1258** // N // litosetoenin B // IA vs 4 HTCLs.

**1259** // N // litosetoenin C // IA vs 4 HTCLs.

**1260** // N // litosetoenin D // IA vs 4 HTCLs.

**1261** // N // litosetoenin E // IA vs 4 HTCLs.

**540** Cnidaria *Lemnalia* sp // Xisha Islands, South China Sea // Antimicrobial terpenoids from South China Sea soft coral *Lemnalia* sp.

**1262** // N // biofloranate A // weak vs 2 bact. strains; IA vs 2 virus strains.

**1263** // N // biofloranate B // IA to weak vs 2 bact. strains; IA vs 2 virus strains.

**1264** // N // biofloranate C // IA to weak vs 2 bact. strains; IA vs 2 virus strains.

**1265** // N // biofloranate D // IA to weak vs 2 bact. strains; IA vs 2 virus strains.

**1266** // N // euplexaurene D // IA vs 2 bact. strains; IA vs 2 virus strains.

**1267** // N // cneurubin K // IA to weak vs 2 bact. strains; IA vs 2 virus strains.



7 Cnidaria

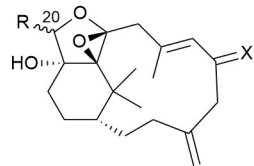

1268 20R\*, X = O, R = OCOCH=CH<sub>2</sub>

1269 20S\*, X = H,  $\blacktriangleleft$ OH, R = OCOCH=CH<sub>2</sub>

1270 20R\*, X = H,  $\blacktriangleleft$ OH, R = OCO(CH<sub>2</sub>)<sub>14</sub>CH<sub>3</sub>

1271 20R\*, X = H,  $\blacktriangleleft$ OH, R = OCO(CH<sub>2</sub>)<sub>7</sub>CH=CH(CH<sub>2</sub>)<sub>7</sub>

1272 20S\*, X = H,  $\blacktriangleleft$ OH, R = OMe

1273 20R\*, X = H,  $\blacktriangleleft$ OH, R = OMe

1274 X = H,  $\blacktriangleleft$ OAc, R = H

1275 20S\*, X = H,  $\blacktriangleleft$ OH, R = OAc

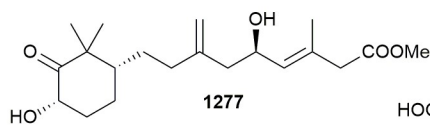

1277

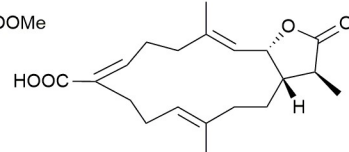

1280

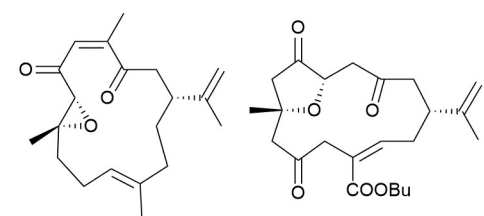

1282

1283

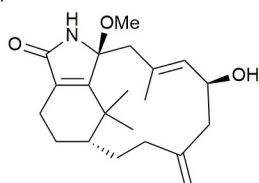

1276

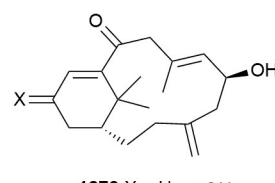

1278 X = H,  $\blacktriangleleft$ OH  
1279 X = O

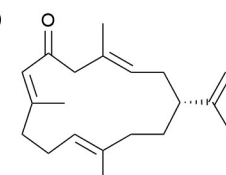

1281

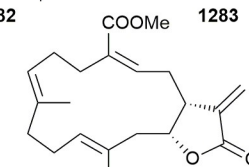

†1284

541 Cnidaria *Cespitularia* sp // Green Island, Southeastern Taiwan // Bioactive diterpenes, norditerpenes, and sesquiterpenes from a Formosan soft coral *Cespitularia* sp.

1268 // N // cespitulin H // IA vs anti-inflam.

1269 // N // cespitulin I // IA vs anti-inflam.

1270 // N // cespitulin J // IA vs anti-inflam.

1271 // N // cespitulin K // IA vs anti-inflam.

1272 // N // cespitulin L // IA vs anti-inflam.

1273 // N // cespitulin M // IA vs anti-inflam.

1274 // N // cespitulin N // IA vs anti-inflam.

1275 // N // cespitulin O // IA vs anti-inflam.

1276 // N // cespitulactam L // IA vs anti-inflam.

1277 // N // cespitulin P // IA vs anti-inflam.

1278 // N // cespitulin Q // IA vs anti-inflam.

1279 // N // cespitulin R // IA vs anti-inflam.

555 Cnidaria *Lobophytum crassum* // Southern Taiwan // Cembranoids from octocoral *Lobophytum crassum* (von Marenzeller, 1886)

1280 // N // lobocrassin I // IA vs anti-inflam.; XRD

556 Cnidaria *Lobophytum crassum* // Ximao Island, Hainan Province, China // Polyoxygenated cembranoids from soft coral *Lobophytum crassum* and their anti-tumoral activities

1281 // N // 6-oxo-cembrene-A // IA vs 4 HTCLs.

1282 // N // lobocrassin G // IA vs 4 HTCLs.

1283 // N // lobocrassin H // IA vs 4 HTCLs.

1284 // N // 14-*epi*-lobophytolide B // IA vs 4 HTCLs.

## 7 Cnidaria

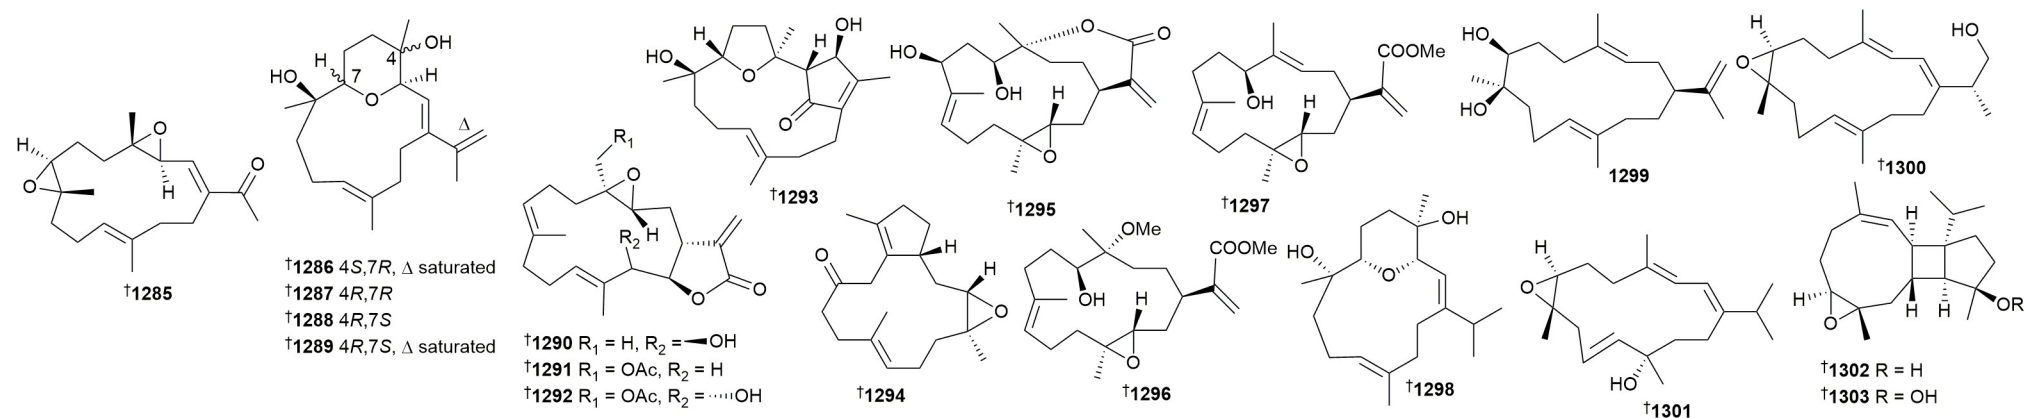

- 557** Cnidaria *Lobophytum crassum* // Ximao Island, Hainan Province, China // Polyoxygenated cembranoids from the Hainan soft coral *Lobophytum crassum*  
**1285** // N // lobophycrasin A // IA vs anti-inflam.; IA vs TCLs.  
**1286** // N // (-)-humilisin A // IA vs anti-inflam.; IA vs TCLs; enant. of known MNP.  
**1287** // N // lobophycrasin B // IA vs anti-inflam.; IA vs TCLs.  
**1288** // N // lobophycrasin C // IA vs anti-inflam.; IA vs TCLs.  
**1289** // N // lobophycrasin D // IA vs anti-inflam.; IA vs TCLs.
- 556** Cnidaria *Lobophytum crassum* // Ximao Island, Hainan Province, China // Polyoxygenated cembranoids from soft coral *Lobophytum crassum* and their anti-tumoral activities  
**1290** // R // durumolide J // weak cytotox. vs 4 HTCLs; abs. config. from XRD.  
**1291** // R // lobolide A // weak cytotox. vs 4 HTCLs; abs. config. from XRD.  
**1292** // R // 20-acetylsinularolide C // IA to weak cytotox. vs 4 HTCLs; abs config. assigned.
- 557** Cnidaria *Lobophytum crassum* // Ximao Island, Hainan Province, China // Polyoxygenated cembranoids from the Hainan soft coral *Lobophytum crassum*  
**1293** // R // lobocrasol // IA vs anti-inflam.; IA vs TCLs; XRD.
- 558** Cnidaria *Simularia siaesensis* // Ximao Island, Hainan Province, China // Sinusiaetone A, an anti-inflammatory norditerpenoid with a bicyclo[11.3.0]hexadecane nucleus from the Hainan soft coral *Simularia siaesensis*  
**1294** // N // sinusiaetone A // mod. activ. vs anti-inflam.; XRD.  
**1295** // N // sinusiaeolide A // mod. activ. vs anti-inflam.; XRD.  
**1296** // N // sinusiaeolide B // mod. activ. vs anti-inflam.  
**1297** // R // flexibilisin C // NT; abs. config. assigned.
- 559** Cnidaria *Simularia humilis* // Ximao Island, Hainan province, People's Republic of China // Uncommon diterpenoids from the South China Sea soft coral *Simularia humilis* and their stereochemistry  
**1298** // N // (+)-humilisin A // IA vs anti-inflam.  
**1299** // N // humilisin B // IA vs anti-inflam.  
**1300** // N // humilisin C // IA vs anti-inflam.  
**1301** // N // humilisin D // IA vs anti-inflam.  
**1302** // N // humilisin E // IA vs anti-inflam.  
**1303** // N // humilisin F // IA vs anti-inflam.

## 7 Cnidaria

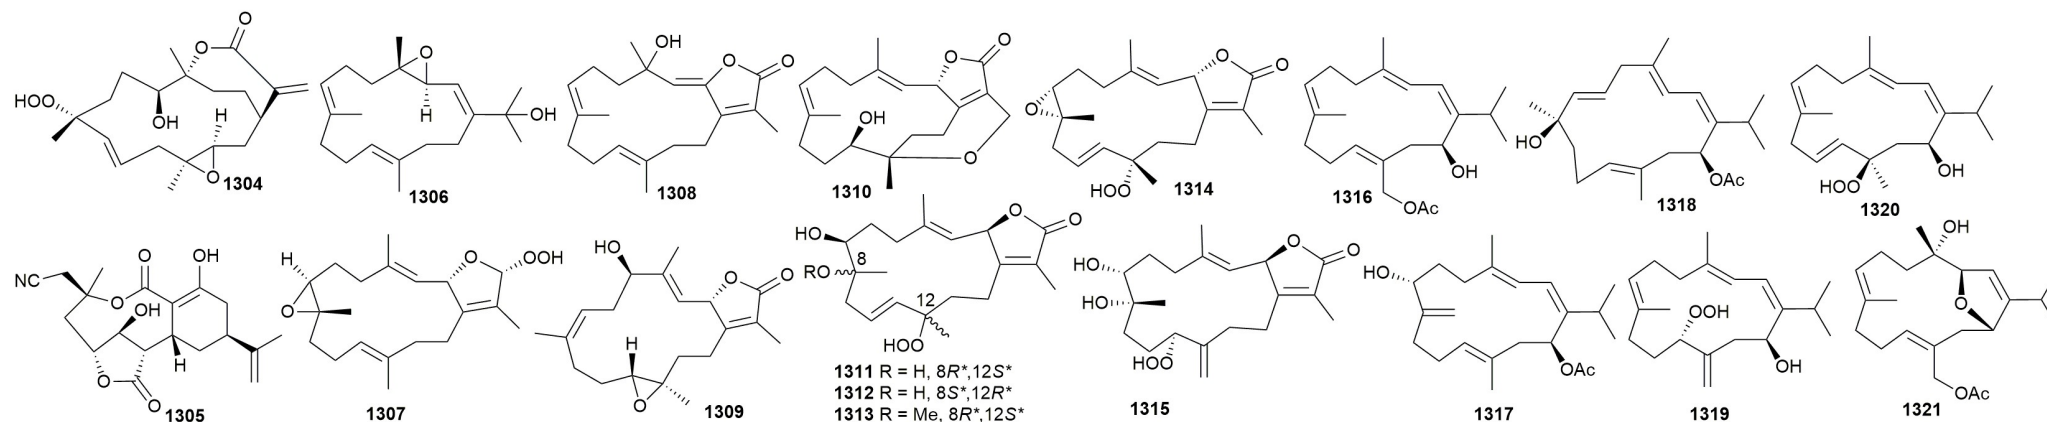

- 560** Cnidaria *Simularia querciformis* // Southern Taiwan // Natural cembrane diterpenoids from the soft coral *Simularia querciformis*  
**1304** // N // querciformolide F // IA vs anti-inflam.
- 561** Cnidaria *Simularia multiflora* // Xisha Islands, South China Sea // Terpenoids from the South China Sea soft coral *Simularia multiflora*  
**1305** // N // simulariadiolide B // IA vs 6 HTCLs and 1 nMCL.
- 529** Cnidaria *Sarcophyton tenuispiculatum* // Southern Taiwan // New hydroquinone monoterpenoid and cembranoid-related metabolites from the soft coral *Sarcophyton tenuispiculatum*  
**1306** // N // sarcotenusene A // IA vs 4 HTCLs; IA vs anti-inflam.  
**1307** // N // sarcotenusene B // IA vs 4 HTCLs; IA vs anti-inflam.  
**1308** // N // sarcotenusene C // IA vs 4 HTCLs; IA vs anti-inflam.
- 562** Cnidaria *Sarcophyton cherbonnieri* // Jihui Fish Port, Taiwan // Cherbonolides M and N from a formosan soft coral *Sarcophyton cherbonnieri*  
**1309** // N // cherbonolide M // IA vs 3 HTCLs; IA vs anti-inflam.  
**1310** // N // cherbonolide N // IA vs 3 HTCLs; IA vs anti-inflam.
- 563** Cnidaria *Sarcophyton convolutum* // Red Sea, Hurghada, Egypt // Oxygenated cembrene diterpenes from *Sarcophyton convolutum*: cytotoxic sarcoconvolutum A–E  
**1311** // N // sarcoconvolutum A // IA vs 3 HTCLs.  
**1312** // N // sarcoconvolutum B // IA vs 3 HTCLs.  
**1313** // N // sarcoconvolutum C // IA vs 3 HTCLs.  
**1314** // N // sarcoconvolutum D // IA vs 3 HTCLs.  
**1315** // N // sarcoconvolutum E // IA vs 3 HTCLs.
- 564** Cnidaria *Sarcophyton glaucum* // Ximao Island, Hainan Province, China // Ximaoglaucumins A - F, new cembranoids with anti-inflammatory activities from the South China Sea soft coral *Sarcophyton glaucum*  
**1316** // N // ximaoglaucumin A // IA inhib. NO prod.  
**1317** // N // ximaoglaucumin B // IA inhib. NO prod.  
**1318** // N // ximaoglaucumin C // IA inhib. NO prod.; 14-acetyl sarcophytol R.  
**1319** // N // ximaoglaucumin D // IA inhib. NO prod.; peroxy-sarcophytol E.  
**1320** // N // ximaoglaucumin E // IA inhib. NO prod.  
**1321** // N // ximaoglaucumin F // IA inhib. NO prod.; 20-acetoxy-(-)-marasol.

7 Cnidaria

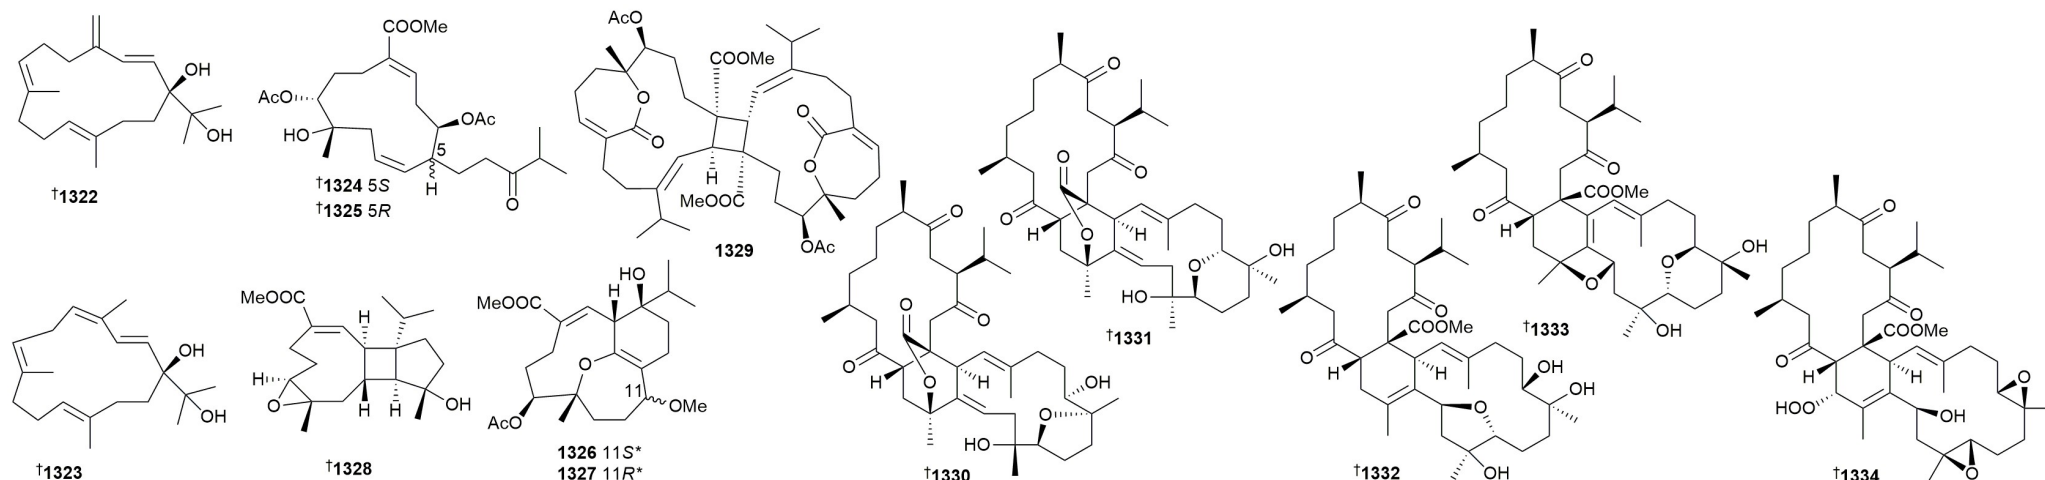

- 565** Cnidaria *Sarcophyton trocheliophorum* // Ximao Island, Hainan Province, China // Further new cembranoids from the South China Sea soft coral *Sarcophyton trocheliophorum*  
**1322** // N // ximaosarcophytol A // IA towards various undisclosed assays.  
**1323** // N // ximaosarcophytol B // IA towards various undisclosed assays.
- 566** Cnidaria *Sarcophyton tortuosum* // Lanyu Island, Taiwan // Cembranoid-related diterpenes, novel secoditerpenes, and an unusual bisditerpene from a Formosan soft coral *Sarcophyton tortuosum*  
**1324** // N // secotortuosene A // IA vs 3 TCLs; IA vs anti-inflam.  
**1325** // N // secotortuosene B // IA vs 3 TCLs; IA vs anti-inflam.  
**1326** // N // tortuosene C // IA vs 3 TCLs; IA vs anti-inflam.  
**1327** // N // tortuosene D // IA vs 3 TCLs; IA vs anti-inflam.  
**1328** // N // tortuosumol // IA vs 3 TCLs; IA vs anti-inflam.  
**1329** // N // bistortuolide cyclobutane A // IA to weak vs 3 TCLs; weak inhib. superoxide and elastase release.
- 567** Cnidaria *Sarcophyton tortuosum* // Yalong Bay, Hainan, China // Polyoxygenated anti-inflammatory biscembranoids from the soft coral *Sarcophyton tortuosum* and their stereochemistry  
**1330** // N // ximaolide H // IA vs anti-inflam.; IA cytotox.; IA vs bact.  
**1331** // N // ximaolide I // IA vs anti-inflam.; IA cytotox.; IA vs bact.  
**1332** // N // ximaolide J // IA vs anti-inflam.; IA cytotox.; IA vs bact.  
**1333** // N // ximaolide K // IA vs anti-inflam.; IA cytotox.; IA vs bact.  
**1334** // N // ximaolide L, 38-hydroperoxy ximaolide A // IA vs anti-inflam.; IA cytotox.; IA vs bact.

## 7 Cnidaria

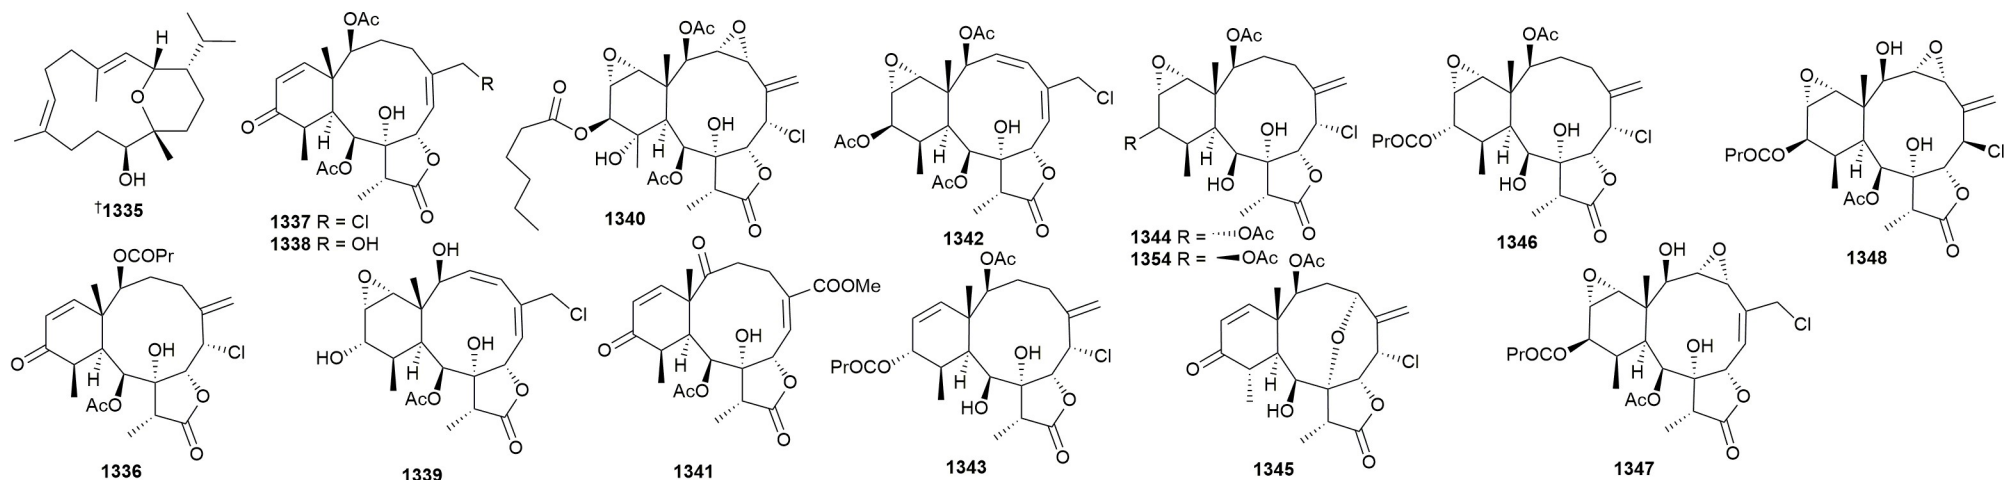

**564** Cnidaria *Sarcophyton glaucum* // Ximao Island, Hainan Province, China // Ximaoglaucumins A - F, new cembranoids with anti-inflammatory activities from the South China Sea soft coral *Sarcophyton glaucum*

**1335** // R // sarcophytolol // correction of known MNP; trivial name sarcotrocheliol is now redundant.

**576** Cnidaria *Briareum asbestinum* // Yucatan Peninsula, Mexico // Absolute configuration by vibrational circular dichroism of anti-inflammatory macrolide briarane diterpenoids from the Gorgonian *Briareum asbestinum*

**1336** // N // 2-butyryloxybriarane B-3 // NT.

**1337** // N // 9-acetylbriarenolide S // NT.

**1338** // N // briarenolide W // IA inhib. activation NF- $\kappa$ B by LPS.

**1339** // N // 12-isobriarenolide P // NT.

**578** Cnidaria *Briareum excavatum* // Lanyu Island, Taiwan // Briarenol L, a new chlorine-containing briarane from *Briareum excavatum* (Briareidae)

**1340** // N // briarenol L // IA vs anti-inflam.

**579** Cnidaria *Briareum excavatum*, Cnidaria *Briareum stechei* // Aquaculture specimens // Briarenols O and P: novel briaranes from a cultured octocoral *Briareum excavatum* (Briareidae)

**1341** // N // briarenol O // mod. active pro-inflam.

**1342** // N // briarenol P // IA vs anti-inflam.

**580** Cnidaria *Briareum stechei* // Ie Island, Okinawa, Japan // Chlorinated briarane diterpenoids from octocoral *Briareum stechei* (Kükenthal, 1908)

**1343** // N // briarenol U // mod. active pro-inflam.

**1344** // N // briarenol V // IA vs anti-inflam.

**581** Cnidaria *Briareum stechei* // Aquaculture specimens // Briarenols W–Z: chlorine-containing polyoxygenated briaranes from octocoral *Briareum stechei* (Kükenthal, 1908)

**1345** // N // briarenol W // IA vs anti-inflam.

**1346** // N // briarenol X // mod. active pro-inflam.

**1347** // N // briarenol Y // IA vs anti-inflam.

**1348** // N // briarenol Z // IA vs anti-inflam.

7 Cnidaria

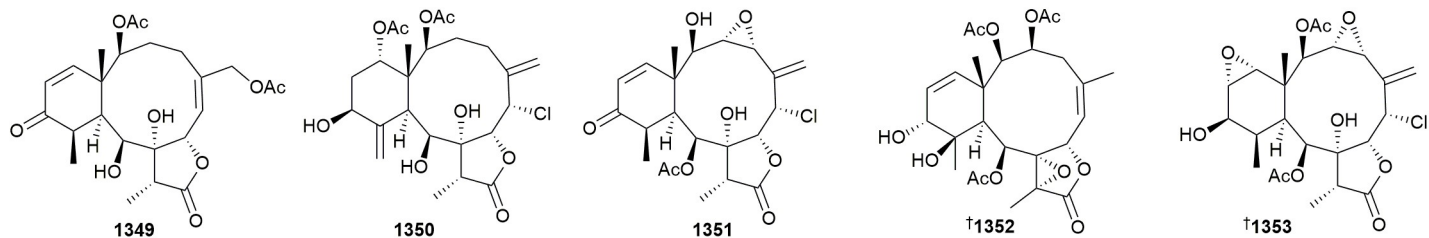

- 582** Cnidaria *Briareum stechei* // Ie Island, Okinawa, Japan // 8-Hydroxybriaranes from octocoral *Briareum stechei* (Briareidae) (Kükenthal, 1908)  
**1349** // N // briastecholide A // IA vs anti-inflam.
- 583** Cnidaria *Briareum stechei* // Ie Island, Okinawa, Japan // Briarane-related diterpenoids from octocoral *Briareum stechei*  
**1350** // N // briastecholide B // IA vs NO prod.  
**1351** // N // briastecholide C // IA vs NO prod.; 2-O-deacetyl briarenol R.
- 578** Cnidaria *Briareum excavatum* // Lanyu Island, Taiwan // Briarenol L, a new chlorine-containing briarane from *Briareum excavatum* (Briareidae)  
**1352** // R // briarenol G // IA vs anti-inflam.; XRD.
- 582** Cnidaria *Briareum stechei* // Ie Island, Okinawa, Japan // 8-Hydroxybriaranes from octocoral *Briareum stechei* (Briareidae) (Kükenthal, 1908)  
**1353** // R // solenolide C // IA vs anti-inflam.; XRD.
- 580** Cnidaria *Briareum stechei* // Ie Island, Okinawa, Japan // Chlorinated briarane diterpenoids from octocoral *Briareum stechei* (Kükenthal, 1908)  
**1354** // R // solenolide B // IA vs anti-inflam.; corrected to  $\beta$ -acetoxy orientation.

7 Cnidaria

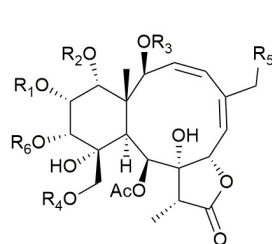

- 1355 R<sub>1</sub> = Ac, R<sub>2</sub> = CO/Bu, R<sub>3</sub> = Ac, R<sub>4</sub> = H, R<sub>5</sub> = OH, R<sub>6</sub> = H  
 1356 R<sub>1</sub> = CO/Bu, R<sub>2</sub> = Ac, R<sub>3</sub> = Ac, R<sub>4</sub> = H, R<sub>5</sub> = OH, R<sub>6</sub> = H  
 1357 R<sub>1</sub> = H, R<sub>2</sub> = CO/Bu, R<sub>3</sub> = Ac, R<sub>4</sub> = H, R<sub>5</sub> = OCO/Bu, R<sub>6</sub> = H  
 1358 R<sub>1</sub> = Ac, R<sub>2</sub> = Ac, R<sub>3</sub> = Ac, R<sub>4</sub> = H, R<sub>5</sub> = OCO/Bu, R<sub>6</sub> = H  
 1359 R<sub>1</sub> = Ac, R<sub>2</sub> = CO/Bu, R<sub>3</sub> = Ac, R<sub>4</sub> = H, R<sub>5</sub> = OCO/Bu, R<sub>6</sub> = Ac  
 1360 R<sub>1</sub> = Ac, R<sub>2</sub> = Ac, R<sub>3</sub> = Ac, R<sub>4</sub> = H, R<sub>5</sub> = OEt, R<sub>6</sub> = CO/Bu  
 1361 R<sub>1</sub> = CO/Bu, R<sub>2</sub> = CO/Bu, R<sub>3</sub> = Ac, R<sub>4</sub> = H, R<sub>5</sub> = OAc, R<sub>6</sub> = Ac  
 1362 R<sub>1</sub> = Ac, R<sub>2</sub> = Ac, R<sub>3</sub> = Ac, R<sub>4</sub> = H, R<sub>5</sub> = OCO/Bu, R<sub>6</sub> = CO/Bu  
 1363 R<sub>1</sub> = CO/Bu, R<sub>2</sub> = Ac, R<sub>3</sub> = Ac, R<sub>4</sub> = H, R<sub>5</sub> = OCO/Bu, R<sub>6</sub> = H  
 1364 R<sub>1</sub> = CO/Bu, R<sub>2</sub> = Ac, R<sub>3</sub> = Ac, R<sub>4</sub> = H, R<sub>5</sub> = OH, R<sub>6</sub> = CO/Bu  
 1365 R<sub>1</sub> = CO/Bu, R<sub>2</sub> = Ac, R<sub>3</sub> = Ac, R<sub>4</sub> = H, R<sub>5</sub> = OEt, R<sub>6</sub> = CO/Bu  
 1366 R<sub>1</sub> = CO/Bu, R<sub>2</sub> = Ac, R<sub>3</sub> = Ac, R<sub>4</sub> = H, R<sub>5</sub> = OCO/Bu, R<sub>6</sub> = CO/Bu

- 1367 R<sub>1</sub> = CO/Bu, R<sub>2</sub> = Ac, R<sub>3</sub> = COCH<sub>2</sub>OCO/Bu, R<sub>4</sub> = H, R<sub>5</sub> = OH, R<sub>6</sub> = H  
 1368 R<sub>1</sub> = Ac, R<sub>2</sub> = Ac, R<sub>3</sub> = COCH<sub>2</sub>OCO/Bu, R<sub>4</sub> = H, R<sub>5</sub> = OCO/Bu, R<sub>6</sub> = Ac  
 1369 R<sub>1</sub> = Ac, R<sub>2</sub> = Ac, R<sub>3</sub> = COCH<sub>2</sub>OCO/Bu, R<sub>4</sub> = H, R<sub>5</sub> = OEt, R<sub>6</sub> = CO/Bu  
 1370 R<sub>1</sub> = Ac, R<sub>2</sub> = CO/Bu, R<sub>3</sub> = COCH<sub>2</sub>OCO/Bu, R<sub>4</sub> = H, R<sub>5</sub> = OH, R<sub>6</sub> = H  
 1371 R<sub>1</sub> = CO/Bu, R<sub>2</sub> = Ac, R<sub>3</sub> = Ac, R<sub>4</sub> = Ac, R<sub>5</sub> = OCO/Bu, R<sub>6</sub> = H  
 1372 R<sub>1</sub> = CO/Bu, R<sub>2</sub> = Ac, R<sub>3</sub> = Ac, R<sub>4</sub> = H, R<sub>5</sub> = Cl, R<sub>6</sub> = CO/Bu  
 1373 R<sub>1</sub> = Ac, R<sub>2</sub> = Ac, R<sub>3</sub> = Ac, R<sub>4</sub> = H, R<sub>5</sub> = Cl, R<sub>6</sub> = H  
 1374 R<sub>1</sub> = Ac, R<sub>2</sub> = Ac, R<sub>3</sub> = COCH<sub>2</sub>OCO/Bu, R<sub>4</sub> = H, R<sub>5</sub> = Cl, R<sub>6</sub> = H  
 1375 R<sub>1</sub> = Ac, R<sub>2</sub> = Ac, R<sub>3</sub> = Ac, R<sub>4</sub> = H, R<sub>5</sub> = Cl, R<sub>6</sub> = CO/Bu  
 1376 R<sub>1</sub> = Ac, R<sub>2</sub> = CO/Bu, R<sub>3</sub> = Ac, R<sub>4</sub> = Ac, R<sub>5</sub> = Cl, R<sub>6</sub> = H  
 1377 R<sub>1</sub> = H, R<sub>2</sub> = Ac, R<sub>3</sub> = Ac, R<sub>4</sub> = H, R<sub>5</sub> = Cl, R<sub>6</sub> = CO/Bu  
 1378 R<sub>1</sub> = CO/Bu, R<sub>2</sub> = Ac, R<sub>3</sub> = COCH<sub>2</sub>OCO/Bu, R<sub>4</sub> = H, R<sub>5</sub> = Cl, R<sub>6</sub> = H

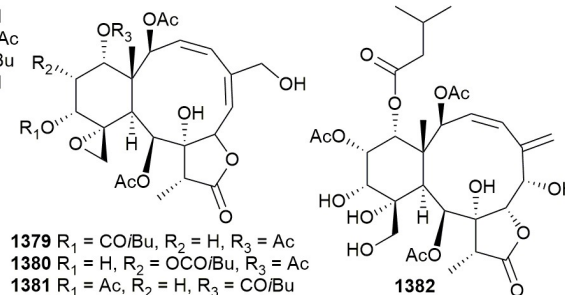

584 Cnidaria *Dichotella gemmacea* // Weizhou island, China // Briarane-type diterpenoids suppress osteoclastogenesis by regulation of Nrf2 and MAPK/NF-κB signaling pathway

- 1355 // N // gemmolide A // weak inhib. osteoclastogenesis; XRD.  
 1356 // N // gemmolide B // weak inhib. osteoclastogenesis.  
 1357 // N // gemmolide C // weak inhib. osteoclastogenesis.  
 1358 // N // gemmolide D // weak inhib. osteoclastogenesis.  
 1359 // N // gemmolide E // IA vs osteoclastogenesis.  
 1360 // N // gemmolide F // weak inhib. osteoclastogenesis.  
 1361 // N // gemmolide G // weak inhib. osteoclastogenesis.  
 1362 // N // gemmolide H // IA vs osteoclastogenesis.  
 1363 // N // gemmolide I // weak inhib. osteoclastogenesis.  
 1364 // N // gemmolide J // IA vs osteoclastogenesis.  
 1365 // N // gemmolide K // cytotox. vs bone marrow macrophages.  
 1366 // N // gemmolide L // cytotox. vs bone marrow macrophages.  
 1367 // N // gemmolide M // IA vs osteoclastogenesis.  
 1368 // N // gemmolide N // weak inhib. osteoclastogenesis.  
 1369 // N // gemmolide O // IA vs osteoclastogenesis.  
 1370 // N // gemmolide P // IA vs osteoclastogenesis.  
 1371 // N // gemmolide Q // weak inhib. osteoclastogenesis.  
 1372 // N // gemmolide R // IA vs osteoclastogenesis.  
 1373 // N // gemmolide S // IA vs osteoclastogenesis.  
 1374 // N // gemmolide T // IA vs osteoclastogenesis.  
 1375 // N // gemmolide U // IA vs osteoclastogenesis.  
 1376 // N // gemmolide V // IA vs osteoclastogenesis.  
 1377 // N // gemmolide W // weak inhib. osteoclastogenesis.  
 1378 // N // gemmolide X // weak inhib. osteoclastogenesis.  
 1379 // N // gemmolide Y // IA vs osteoclastogenesis.  
 1380 // N // gemmolide Z // IA vs osteoclastogenesis.  
 1381 // N // gemmolide Z1 // weak inhib. osteoclastogenesis.  
 1382 // N // gemmolide Z2 // IA vs osteoclastogenesis.

7 **Cnidaria**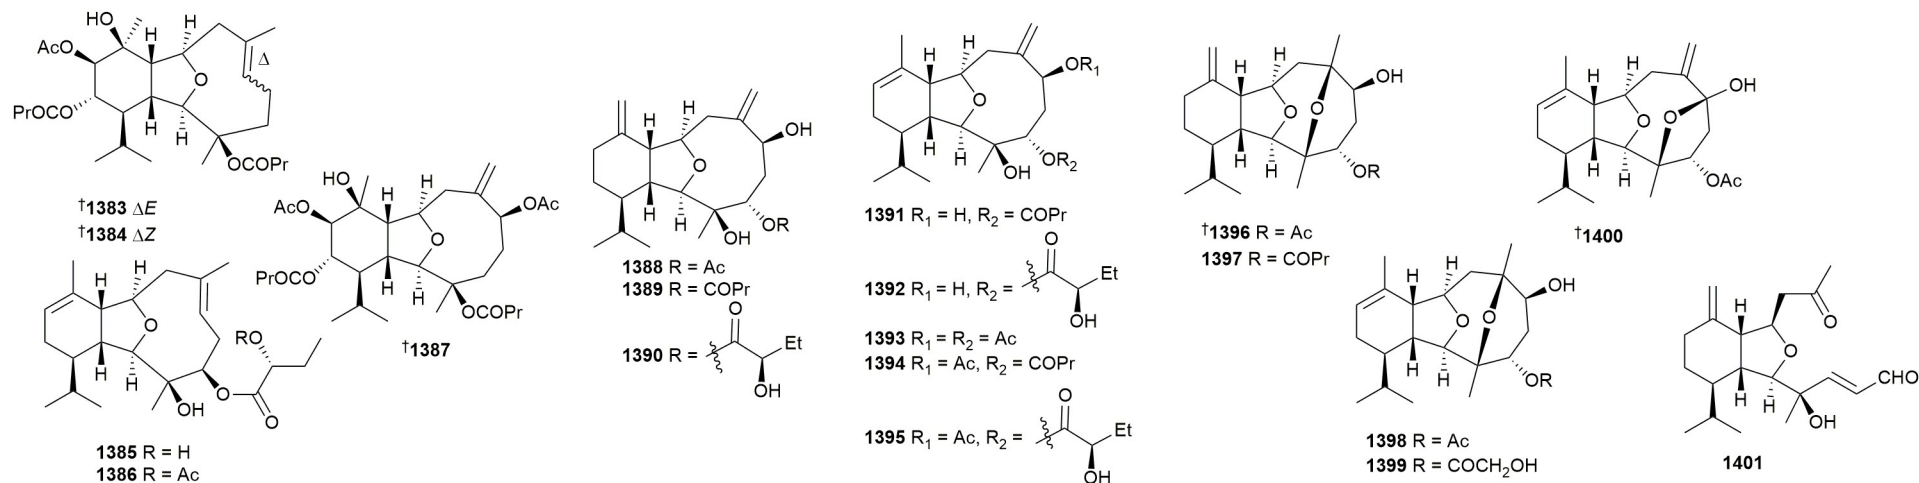

**585** Cnidaria *Klyxum flaccidum* // Ximao Island, Hainan Province, China // Klyflaccilins B-T, polyoxygenated eunicellins from the soft coral *Klyxum flaccidum*

**1383** // N // klyflaccilin B // NT; XRD.

**1384** // N // klyflaccilin C // NT; XRD.

**1385** // N // klyflaccilin D // NT.

**1386** // N // klyflaccilin E // NT.

**1387** // N // klyflaccilin F // NT; XRD.

**1388** // N // klyflaccilin G // NT.

**1389** // N // klyflaccilin H // NT.

**1390** // N // klyflaccilin I // NT.

**1391** // N // klyflaccilin J // NT.

**1392** // N // klyflaccilin K // NT.

**1393** // N // klyflaccilin L // NT.

**1394** // N // klyflaccilin M // NT.

**1395** // N // klyflaccilin N // NT.

**1396** // N // klyflaccilin O // NT; XRD.

**1397** // N // klyflaccilin P // NT.

**1398** // N // klyflaccilin Q // NT.

**1399** // N // klyflaccilin R // NT.

**1400** // M // klyflaccilin S // NT; XRD.

**1401** // N // klyflaccilin T // NT.



## 7 Cnidaria

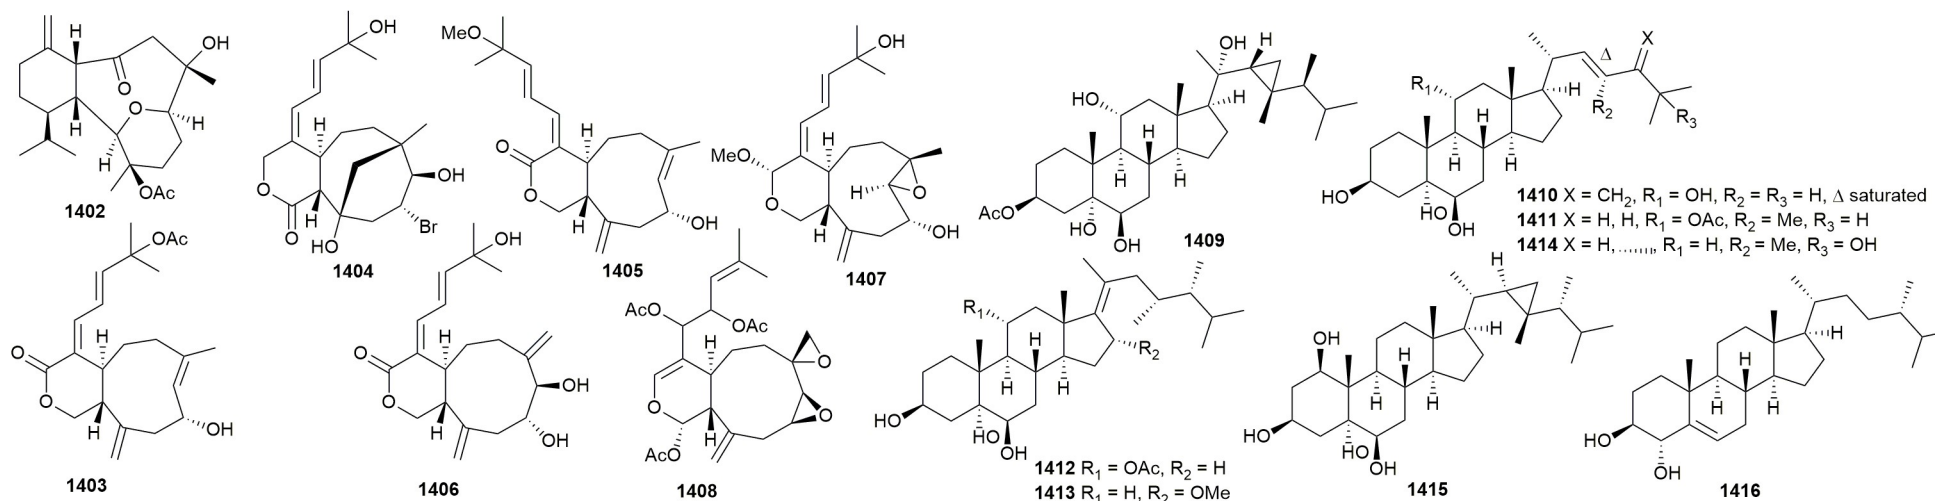

- 561** Cnidaria *Simularia multiflora* // Xisha Islands, South China Sea // Terpenoids from the South China Sea soft coral *Simularia multiflora*  
**1402** // N // multifloralin // IA vs 6 HTCLs and 1 nMCL; inhib. barnacle cyprid settlement.
- 586** Cnidaria *Asterospicularia laurae* // Southern Taiwan // New secondary metabolite with cytotoxicity from spawning soft coral *Asterospicularia laurae* in Taiwan  
**1403** // N // asterolaurin N // IA vs 4 HTCLs.
- 587** Cnidaria *Asterospicularia laurae* // Orchid Island, Taiwan // Targeted isolation of xenicane diterpenoids from Taiwanese soft coral *Asterospicularia laurae*  
**1404** // N // asterolaurin O // IA vs 3 HTCLs.  
**1405** // N // asterolaurin P // IA vs 3 HTCLs.  
**1406** // N // asterolaurin Q // IA vs 3 HTCLs.  
**1407** // N // asterolaurin R // IA vs 3 HTCLs.
- 588** Cnidaria *Xenia umbellata* // Jeddah, Red Sea coast, Saudi Arabia // Antiproliferative isoprenoid derivatives from the Red Sea Alcyonacean *Xenia umbellata*  
**1408** // N // xeniolide O // IA to weak cytotox. vs 3 HTCLs.  
**1409** // N // gorgst-3β,5α,6β,11α,20(S)-pentol-3-monoacetate // IA vs 3 HTCLs.
- 589** Cnidaria *Sarcophyton ehrenbergi* // Van Phong Bay, Khanh Hoa province, Vietnam // Polyhydroxylated sterols from the Vietnamese soft coral *Sarcophyton ehrenbergi*  
**1410** // N // ehrensteroid A // IA vs 5 HTCLs.  
**1411** // N // ehrensteroid B // IA vs 5 HTCLs.  
**1412** // N // ehrensteroid C // IA vs 5 HTCLs.  
**1413** // N // ehrensteroid D // IA vs 5 HTCLs.  
**1414** // N // ehrensteroid E // IA vs 5 HTCLs.  
**1415** // N // ehrensteroid F // IA vs 5 HTCLs.
- 590** Cnidaria *Simularia sandensis* // Aquaculture specimens // Sterol constituents from a cultured octocoral *Simularia sandensis* (Verseveldt 1977)  
**1416** // N // (24S)-24-methylcholest-5-en-3β,4α-diol // IA vs anti-inflam.

7 Cnidaria

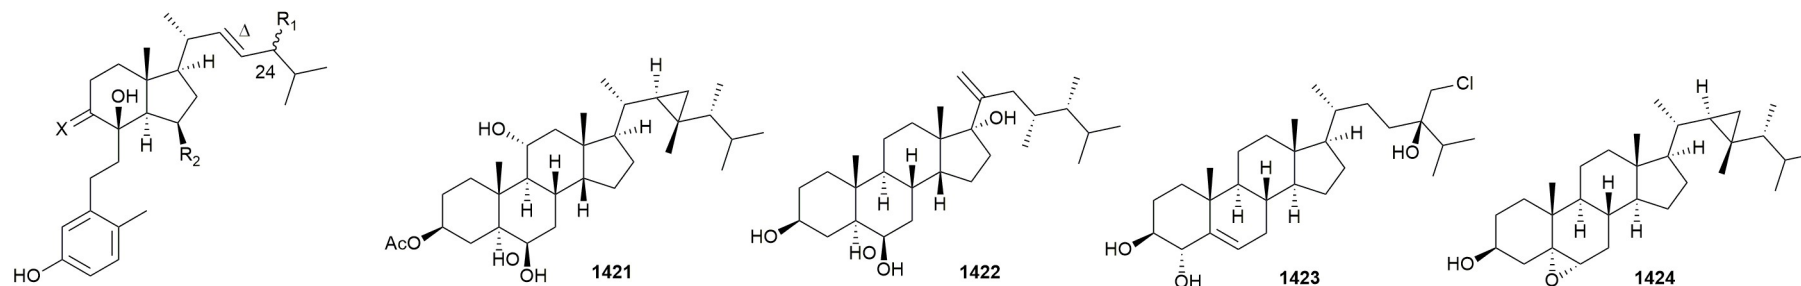

1417 24S\*, R<sub>1</sub> = Me, R<sub>2</sub> = H, X = H, .....OH  
 1418 24R\*, R<sub>1</sub> = Me, R<sub>2</sub> = H, X = H, .....OH Δ saturated  
 1419 R<sub>1</sub> = H, R<sub>2</sub> = H, X = O  
 1420 24S\*, R<sub>1</sub> = Me, R<sub>2</sub> = OH, X = O

- 591** Cnidaria *Verrucella umbraculum* // Yongxing Island, South China Sea // Immunosuppressive 9,10-secosteroids from the gorgonian *Verrucella umbraculum* collected in the South China Sea  
 1417 // N // verrucellol A // weak activ. vs immunomod.  
 1418 // N // verrucellol B // weak activ. vs immunomod.  
 1419 // N // verrucellol C // weak activ. vs immunomod.  
 1420 // N // verrucellol D // IA vs immunomod.
- 592** Cnidaria *Heteroxenia fuscescens* // National Institute of Oceanography and Fisheries, Hurghada, Egypt // Two new polyhydroxylated steroids from Egyptian soft coral *Heteroxenia fuscescens* (Fam.; Xeniidae)  
 1421 // N // 3β-acetoxy-gorgost-5α,6β,11α-triol // NT.  
 1422 // M // (23R)-methylergosta-20-ene-3β,5α,6β,17α-tetrol // IA vs 1 HTCL.
- 542** Cnidaria *Simularia brassica* // Van Phong bay, Khanh Hoa province, Vietnam // Isolation of sesquiterpenoids and steroids from the soft coral *Simularia brassica* and determination of their absolute configuration  
 1423 // N // (24R)-28-chloroergost-5-ene-3β,4α,24-triol // IA vs *Leishmania donovani*; IA vs 2 bact. and 1 fungal strain.  
 1424 // N // 5α,6α-epoxygorgosterol // IA vs *L. donovani*; IA vs 2 bact. and 1 fungal strain.

## 9 Molluscs

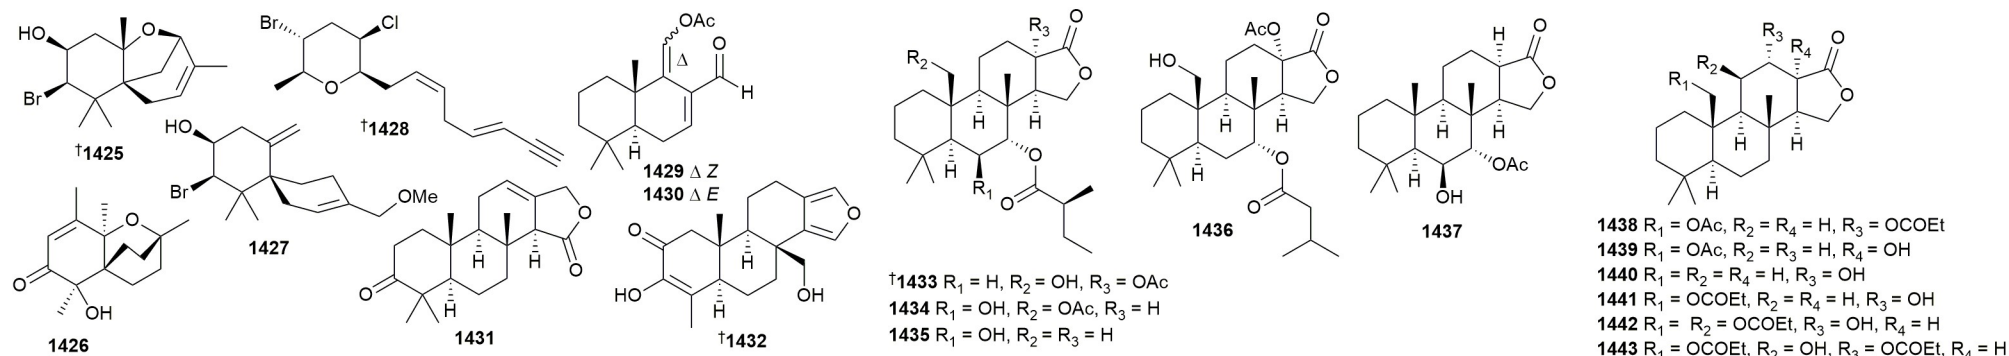

- 606** Mollusca *Aplysia dactylomela* // Thanh Hoa sea, Vietnam // Aplydactylonins A-C, three new sesquiterpenes from the Vietnamese sea hare *Aplysia dactylomela* and their cytotoxicity  
**1425** // N // aplydactylonin A // IA vs 3 HTCLs; XRD.  
**1426** // N // aplydactylonin B // IA to weak cytotox. vs 3 HTCLs; induces apoptosis and necrosis.  
**1427** // N // aplydactylonin C // IA vs 3 HTCLs.
- 607** Mollusca *Aplysia oculifera* // \* // Asymmetric Total Synthesis and Determination of the Absolute Configuration of (+)-Srilankenyne via Sequence-Sensitive Halogenations Guided by Conformational Analysis  
**1428** // R // (+)-srilankenyne // asymmetric synth.
- 614** Mollusca *Ardeadoris rubroannulata* // Hancock Shoal, Coolum, S.E. Queensland, Australia // Oxygenated sesquiterpenes from the Indo-Pacific nudibranch *Ardeadoris rubroannulata*: structure revision of pu'ulenal  
**1429** // R // pu'ulenal // NT; XRD; Z olefin.  
**1430** // N // isopu'ulenal // NT; E olefin.
- 615** Mollusca *Glossodoris (Doriprismatica) atromarginata* // Weizhou Island, South China Sea // The chemical and chemo-ecological studies on Weizhou nudibranch *Glossodoris atromarginata*  
**1431** // N // C<sub>20</sub>H<sub>28</sub>O<sub>3</sub> // NT.  
**1432** // R // C<sub>19</sub>H<sub>23</sub>O<sub>4</sub> // NT; abs. config. determ.
- 616** Mollusca *Goniobranchus aureopurpureus*, Mollusca *Goniobranchus* sp // Nelson Bay, New South Wales, Australia // Expanding the repertoire of spongian-16-one derivatives in Australian nudibranchs of the genus *Goniobranchus* and evaluation of their anatomical distribution  
**1433** // N // (-)-13-acetoxy-20-hydroxy-7 $\alpha$ -oxyspongian-16-one-7 $\alpha$ -(2-methyl)-butanoate // NT; XRD.  
**1434** // N // (-)-20-acetoxy-6 $\beta$ -hydroxy-7 $\alpha$ -oxyspongian-16-one-7 $\alpha$ -(2-methyl)-butanoate // NT.  
**1435** // N // (-)-6 $\beta$ -hydroxy-7 $\alpha$ -oxyspongian-16-one-7 $\alpha$ -(2-methyl)-butanoate // NT.  
**1436** // N // (-)-13-acetoxy-20-hydroxy-7 $\alpha$ -oxyspongian-16-one-7 $\alpha$ -(3-methyl)-butanoate // NT; XRD.  
**1437** // N // (-)-7 $\alpha$ -acetoxy-6 $\beta$ -hydroxyspongian-16-one // NT.  
**1438** // N // (-)-20-acetoxy-12 $\alpha$ -oxyspongian-16-one-12 $\alpha$ -propionate // NT.  
**1439** // N // (-)-20-acetoxy-13-hydroxyspongian-16-one // NT.  
**1440** // N // (-)-12-hydroxyspongian-16-one // NT.  
**1441** // N // (-)-12-hydroxy-20-oxyspongian-16-one-20-propionate // NT.  
**1442** // N // (-)-12-hydroxy-11,20-dioxyspongian-16-one-11,20-dipropionate // NT.  
**1443** // N // (-)-11-hydroxy-12,20-dioxyspongian-16-one-12,20-dipropionate // NT.

**Key:** Main article bibliography reference // Taxonomy // Location // Article title  
 Compound number // Status // Compound name // Biological activity and Other information

## 9 Molluscs

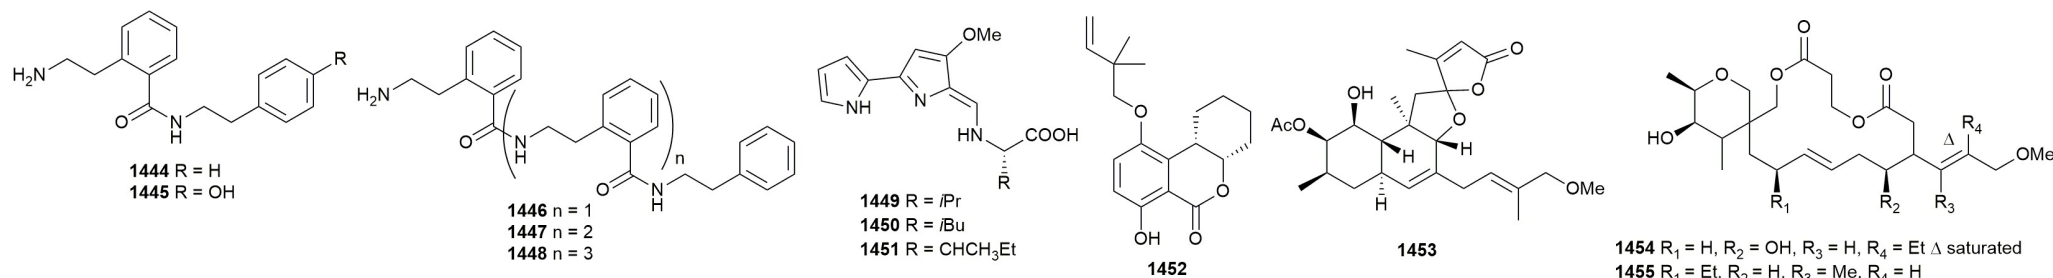

- 617** Mollusca *Pleurobranchus forskalii*, Chordata *Didemnum molle* // Lomousa Reef, Solomon Islands // Nicotinic acetylcholine receptor partial antagonist polyamides from tunicates and their predatory sea slugs  
**1444** // N // molleamine A // IA vs DRG neuron depolaris.; total synth.  
**1445** // N // molleamine B // IA vs DRG neuron depolaris.  
**1446** // N // molleamine C // mod. activ. vs DRG neuron depolaris.; antagonist of nAChR; mod. activ. *in vivo* vs pain; total synth.  
**1447** // N // molleamine D // mod. activ. vs DRG neuron depolaris.  
**1448** // N // molleamine E // mod. activ. vs DRG neuron depolaris.
- 618** Mollusca *Roboastra ernsti*, Mollusca *Tyrannodoris ernsti* // Ilha dos Pargos, Cabo Frio, Brazil // Metabolomics reveals minor tambyamines in a marine invertebrate food chain  
**1449** // N // tambyamine M // NT; total synth.  
**1450** // N // tambyamine N // NT; total synth.  
**1451** // N // tambyamine O // NT; total synth.
- 621** Mollusca *Chicoreus ramosus* // Tuticorin, India // First report of antioxidant 1H-benzochromenone from muricid gastropod *Chicoreus ramosus* as dual inhibitors of pro-inflammatory 5-lipoxygenase and carbolytic enzymes  
**1452** // N // 6-(2',2'-dimethyl)-3'-en-1'-yl-1'-oxy)-3-hydroxy-1H-benzo[c]chromene-2(10aH)-one // IA vs anti-inflam.
- 622** Mollusca *Sepia pharaonis* // Cochin, India // Antioxidant spiropharanone, an undescribed variant of trans-decalin spiro- $\gamma$ -lactone, from pharaoh cuttlefish *Sepia pharaonis*: twin inhibitors of inflammatory 5-lipoxygenase and serine protease dipeptidyl peptidase-4  
**1453** // N // spiropharanone // IA vs anti-inflam.
- 623** Mollusca *Cistopus indicus* // Cochin, India // Cistobislactones A-B, two sixteen-membered spiro-linked macrocyclic bislactones from marine octopus *Cistopus indicus*: new anti-inflammatory agents attenuate arachidonate 5-lipoxygenase  
**1454** // N // cistobislactone A // IA vs anti-inflam.  
**1455** // N // cistobislactone B // IA vs anti-inflam.

9 Molluscs

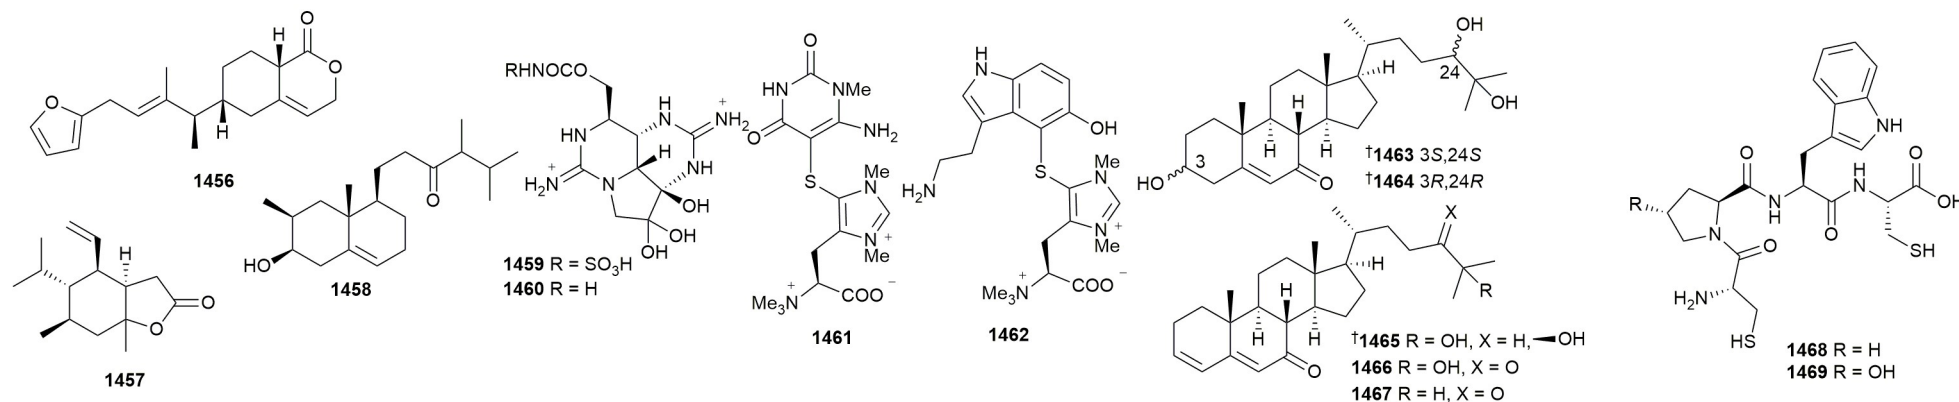

- 624** Mollusca *Uroteuthis duvaucelii* // Southwest Kerala State, India // Antioxidative oxygenated terpenoids with bioactivities against pro-inflammatory inducible enzymes from Indian squid, *Uroteuthis (Photololigo) duvaucelii*  
**1456** // N // 6-((*E*)-12-(furan-13-yl)-10-methylpent-10-en-9-yl)-6,7,8,8a-tetrahydro-3*H*-isochromen-1-(5*H*)-one // IA vs anti-inflam.  
**1457** // N // hexahydro-5-isopropyl-6,7a-dimethyl-4-vinylbenzofuran-2(3*H*)-one // IA vs anti-inflam.  
**1458** // N // 11-(1,2,3,4,7,8,9,10-octahydro-3-hydroxy-2,10-dimethylnaphthalen-9-yl)-14,15-dimethyl hexan-13-one // IA vs anti-inflam.
- 625** Mollusca *Patinopecten yessoensis*, Mollusca *Mizuhopecten yessoensis* // Sanriku, North-eastern Japan // Two new skeletal analogues of saxitoxin found in the scallop, *Patinopecten yessoensis*, as possible metabolites of paralytic shellfish toxins  
**1459** // N // M5-hemiaminal // NT.  
**1460** // N // M6-hemiaminal // IA vs Na<sub>v</sub> blocking activity.
- 647** Mollusca *Conus imperialis* // \* // Small-molecule mimicry hunting strategy in the imperial cone snail, *Conus imperialis*  
**1461** // N // conazolium A // nAChR antagonist; mimics native worm pheromones.  
**1462** // N // conazolium B // NT.
- 648** Mollusca *Conus geographus* // Sogod, Cebu, Philippines // Neuroactive type-A  $\gamma$ -aminobutyric acid receptor allosteric modulator steroids from the hypobranchial gland of marine mollusk, *Conus geographus*  
**1463** // N // conosteroid A // mod. activ. as negative allosteric modulator of GABA(A)-R  
**1464** // N // conosteroid B // mod. activ. as negative allosteric modulator of GABA(A)-R  
**1465** // N // conosteroid C // mod. activ. as negative allosteric modulator of GABA(A)-R  
**1466** // N // conosteroid D // mod. activ. as negative allosteric modulator of GABA(A)-R  
**1467** // N // conosteroid E // mod. activ. as negative allosteric modulator of GABA(A)-R
- 649** Mollusca *Conus lividus* // \* // The Redox-Active Conopeptide Derived from the Venom Duct Transcriptome of *Conus lividus* Assists in the Oxidative Folding of Conotoxin  
**1468** // N // Li504 // NT.  
**1469** // N // Li520 // disulfide isomerase activity.

## 10 Tunicates (ascidians)

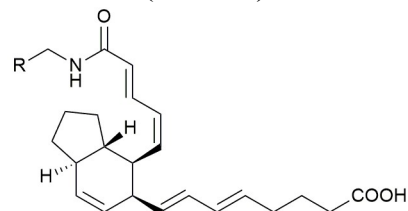

†1470 R = *i*Pr  
 †1471 R = CH<sub>2</sub>Ph  
 †1472 R = CH(Me)Et

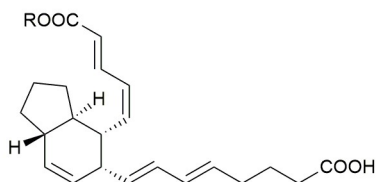

†1473 R = Me  
 †1474 R = H

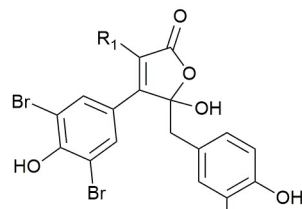

1475 R<sub>1</sub> = H, R<sub>2</sub> = Br  
 1476 R<sub>1</sub> = Cl, R<sub>2</sub> = H

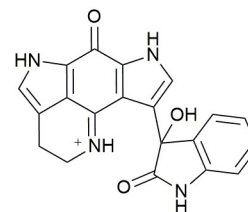

1477

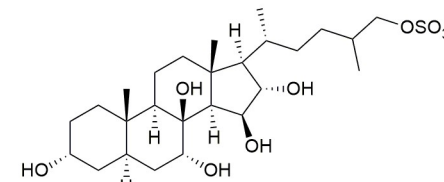

1478

**668** Chordata *Didemnum* sp // South Sea of Korea // Antibacterial bicyclic fatty acids from a Korean colonial tunicate *Didemnum* sp.

1470 // N // C<sub>26</sub>H<sub>37</sub>NO<sub>3</sub> // IA vs *S. aureus*.

1471 // N // C<sub>30</sub>H<sub>37</sub>NO<sub>3</sub> // weak activ. vs *S. aureus*.

1472 // N // C<sub>27</sub>H<sub>39</sub>NO<sub>3</sub> // IA vs *S. aureus*.

1473 // N // C<sub>23</sub>H<sub>30</sub>O<sub>4</sub> // IA vs *S. aureus*.

1474 // N // C<sub>22</sub>H<sub>28</sub>O<sub>4</sub> // NT.

**669** Chordata *Synoicum kuranui* // Spirits Bay, Great Barrier Island, New Zealand // Hydrated rubrolides from the New Zealand tunicate *Synoicum kuranui*

1475 // N // rubrolide V // IA vs 3 bact. strains; IA vs HCT-116.

1476 // N // rubrolide W // IA vs 3 bact. strains; IA vs HCT-116.

**670** Chordata *Clavelina* sp // Ko Domani, Thailand // A new bispyrroloiminoquinone alkaloid from a Thai collection of *Clavelina* sp.

1477 // N // 16-hydroxy-17-oxindole wakayin // weak activ. vs NCI 60 CL.

**671** Chordata *Sycozoa cerebriformis* // Solitary Islands, Australia // Sycosterol A, an  $\alpha$ -synuclein inhibitory sterol from the Australian ascidian *Sycozoa cerebriformis*

1478 // N // sycosterol A // mod. inhib.  $\alpha$ -synuclein aggregation.

## 11 Echinoderms

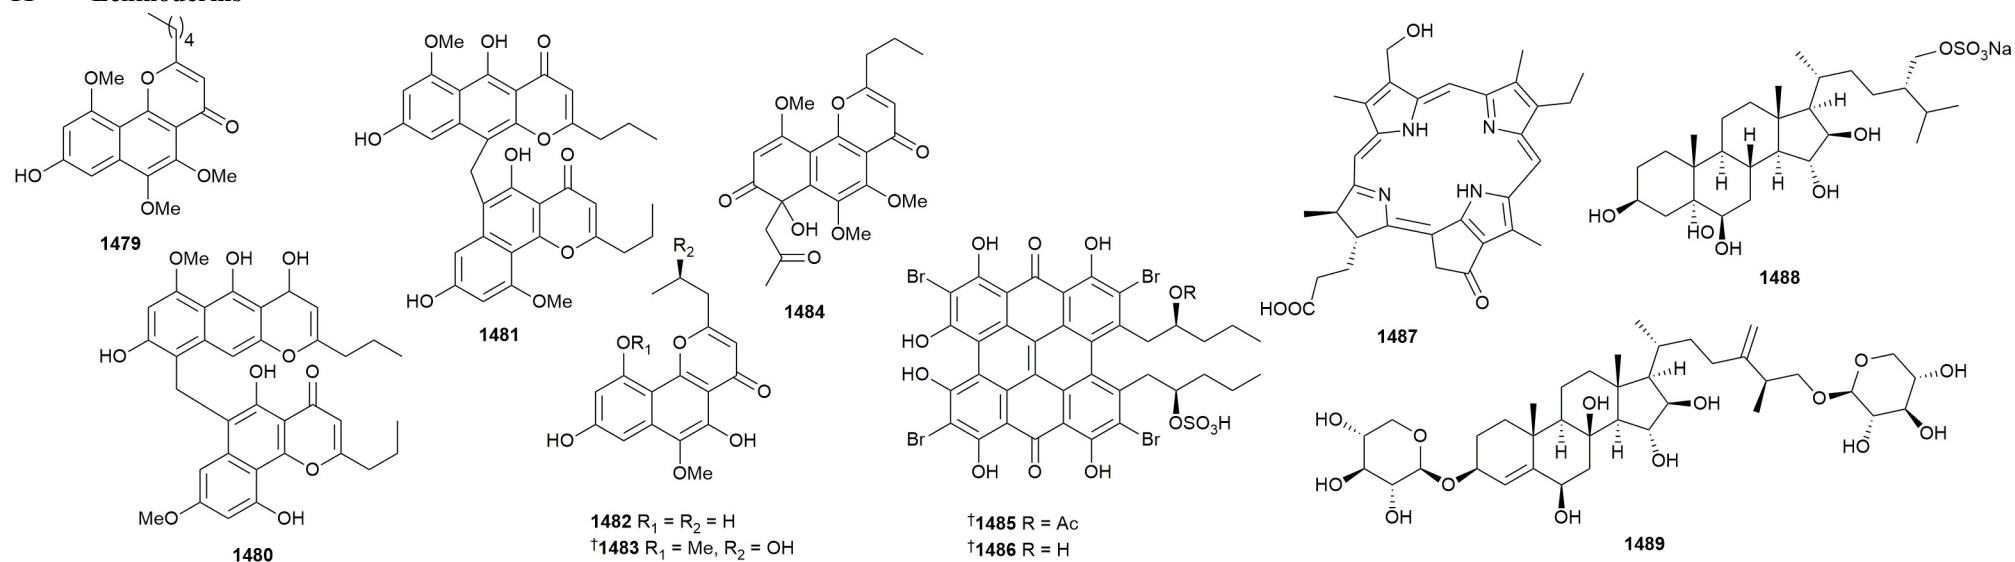

- 693** Echinodermata *Colobometra perspinosa* // Hengchun Peninsula, South China Sea // A new angular naphthopyrone from crinoid *Colobometra perspinosa*  
**1479** // N // 8-hydroxy-5,6,10-trimethoxy-2-pentyl-4H-naphtho[1,2-b]pyran-4-one // IA vs AI.
- 694** Echinodermata *Comanthus delicata* // Van Phong, Khanhhoa, Vietnam // Naphthopyrone and anthraquinone derivatives from *Comanthus delicata*  
**1480** // N // delicapyron A // IA vs 5 HTCLs.  
**1481** // N // delicapyron B // IA vs 5 HTCLs.  
**1482** // N // delicapyron C // IA vs 5 HTCLs.  
**1483** // N // delicapyron D // IA to weak cytotox. vs 5 HTCLs.  
**1484** // N // delicapyron E // IA vs 5 HTCLs; rac.
- 695** Echinodermata *Hyalocrinus naresianus* // Shima Spur, Kumano-nada Sea, Japan // Structure and absolute configuration of phenanthro-perylene quinone pigments from the deep-sea crinoid *Hyalocrinus naresianus*  
**1485** // N // gymnochrome H // NT.  
**1486** // N // monosulfated gymnochrome A // NT.
- 696** Echinodermata *Ophiura sarsii* // Bogdanovich Bay, Russky Island // A cytotoxic porphyrin from North Pacific brittle star *Ophiura sarsii*  
**1487** // M // (3*S*,4*S*)-14-ethyl-9-(hydroxymethyl)-4,8,13,18-tetramethyl-20-oxo-3-phorbinepropanoic acid // IA vs 6 HTCLs and 1 nMCL.
- 699** Echinodermata *Asterias microdiscus* // Chukchi Sea // Polar steroid compounds from the Arctic starfish *Asterias microdiscus* and their cytotoxic properties against normal and tumor cells *in vitro*  
**1488** // N // microdiscusol G // NT.  
**1489** // N // microdiscusoside A // NT.

## 11 Echinoderms

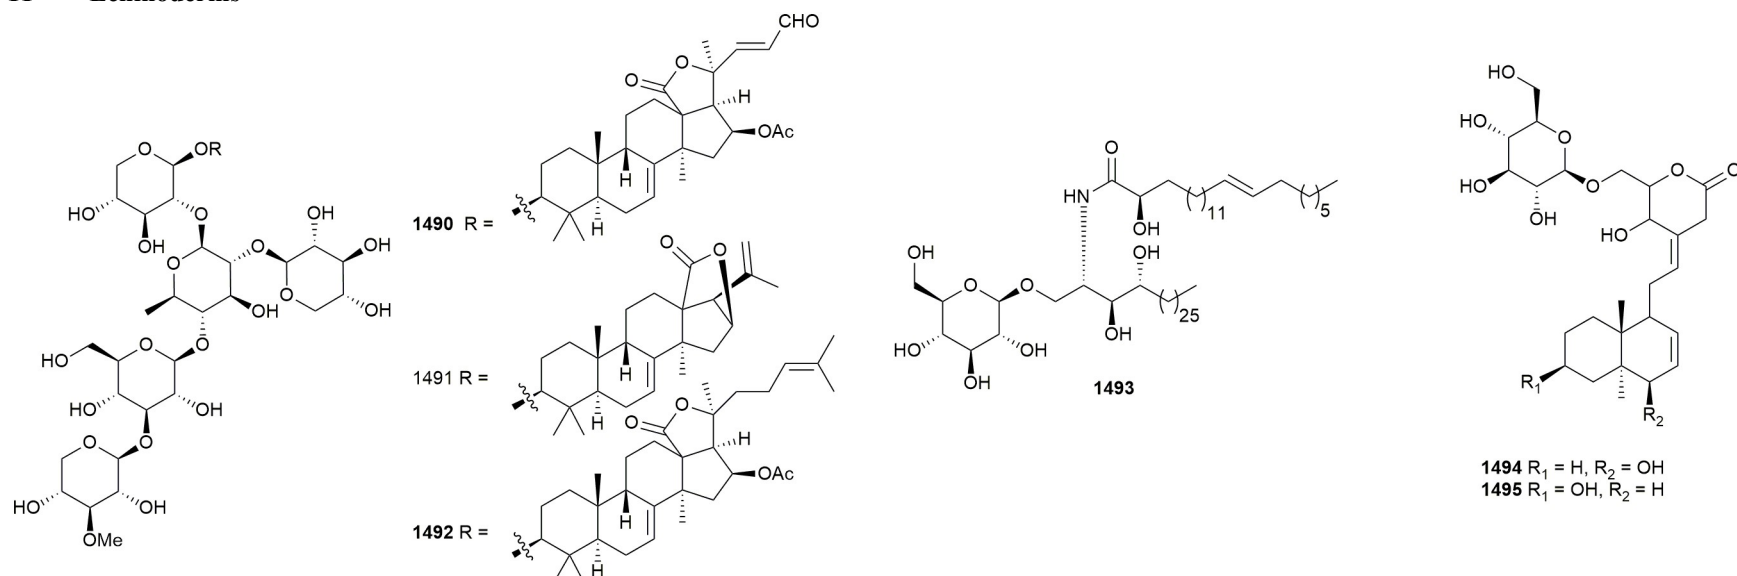

**700** Echinodermata *Solaster pacificus* // Iturup Island, Sea of Okhotsk // New triterpene glycosides from the Far Eastern starfish *Solaster pacificus* and their biological activity

**1490** // N // pacificoside A // IA vs 4 HTCLs.

**1491** // N // pacificoside B // IA vs 4 HTCLs.

**1492** // N // pacificoside C // IA to weak cytotox. vs 4 HTCLs.

**701** Echinodermata *Holothuria spinifera* // Sharm El Sheikh, Egyptian Red Sea // Holospiniferoside: a new antitumor cerebroside from the Red Sea cucumber *Holothuria spinifera*: *in vitro* and *in silico* studies

**1493** // N // holospiniferoside // IA vs 1 HTCL and 1 nMCL.

**702** Echinodermata *Holothuria scabra* // Prachuap Khiri Khan province, Thailand // Diterpene glycosides from *Holothuria scabra* exert the  $\alpha$ -synuclein degradation and neuroprotection against  $\alpha$ -synuclein-mediated neurodegeneration in *C. elegans* model

**1494** // N // HSEA-P1 // weak inhib.  $\alpha$ -synuclein aggregation.

**1495** // N // HSEA-P2 // weak inhib.  $\alpha$ -synuclein aggregation.



## 11 Echinoderms

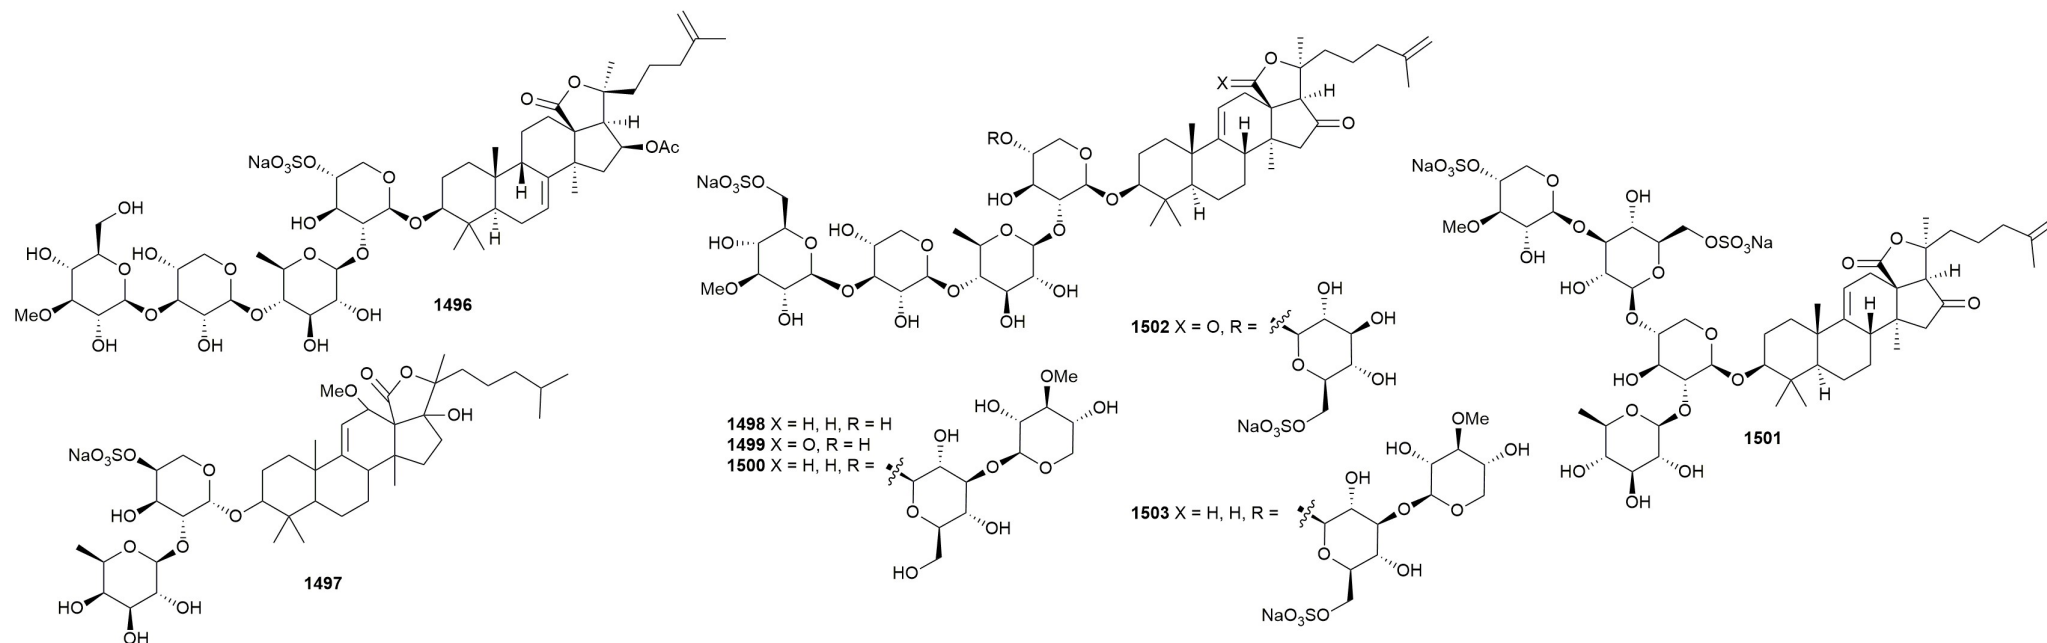

- 703** Echinodermata *Colochirus quadrangularis* // Guangdong province, China // A new sulfated triterpene glycoside from the sea cucumber *Colochirus quadrangularis*, and evaluation of its antifungal, antitumor and immunomodulatory activities  
**1496** // N // coloquadranside A // IA to weak activ. vs 4 fungal strains; weak to mod. activ. vs 8 HTCLs; *in vivo* activ. 2 HTCLs.
- 704** Echinodermata *Holothuria atra* // Jeddah, Saudi Arabia // Sulfated triterpene glycosides from the Saudi Red Sea cucumber *Holothuria atra* with antioxidant and cytotoxic activities  
**1497** // N // echinoside B 12-*O*-methyl ether // IA vs antioxid.; IA vs 1 murine CL.
- 705** Echinodermata *Psolus chitonoides* // North of Bering Island, Bering Sea // Unusual structures and cytotoxicities of chitonoidosides A, A1, B, C, D, and E, six triterpene glycosides from the Far Eastern sea cucumber *Psolus chitonoides*  
**1498** // N // chitonoidoside A // IA to weak cytotox. vs 3 HTCLs; weak hemolytic.  
**1499** // N // chitonoidoside A1 // IA to weak cytotox. vs 3 HTCLs; weak hemolytic.  
**1500** // N // chitonoidoside B // IA vs 3 HTCLs; weak hemolytic.  
**1501** // N // chitonoidoside C // IA vs 3 HTCLs; weak hemolytic.  
**1502** // N // chitonoidoside D // IA to weak cytotox. vs 3 HTCLs; weak hemolytic.  
**1503** // N // chitonoidoside E // NT.

## 11 Echinoderms

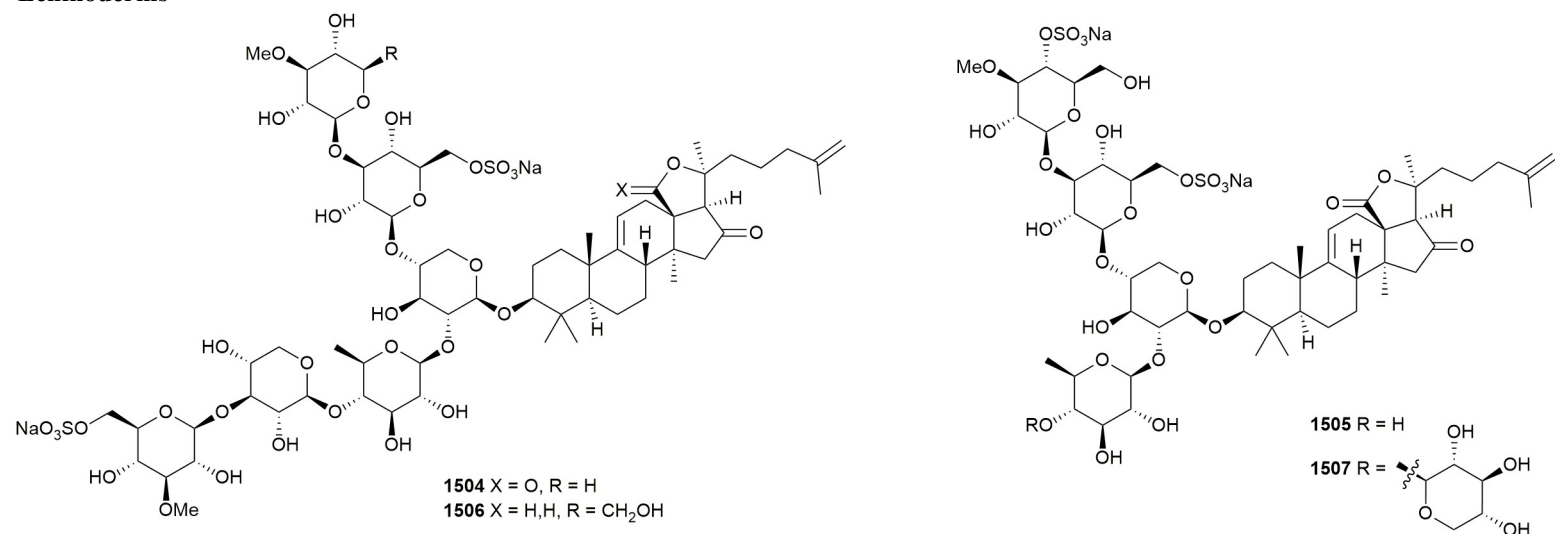

**706** Echinodermata *Psolus chitonoides* // North of Bering Island, Bering Sea // Triterpene glycosides from the Far Eastern sea cucumber *Psolus chitonoides*: chemical structures and cytotoxicities of chitonoidosides E1, F, G, and H

**1504** // N // chitonoidoside E1 // IA to mod. cytotox. vs 4 HTCLs; mod. hemolytic.

**1505** // N // chitonoidoside F // IA to weak cytotox. vs 4 HTCLs; weak hemolytic.

**1506** // N // chitonoidoside G // IA to weak cytotox. vs 4 HTCLs; mod. hemolytic.

**1507** // N // chitonoidoside H // IA to weak cytotox. vs 4 HTCLs; mod. hemolytic.

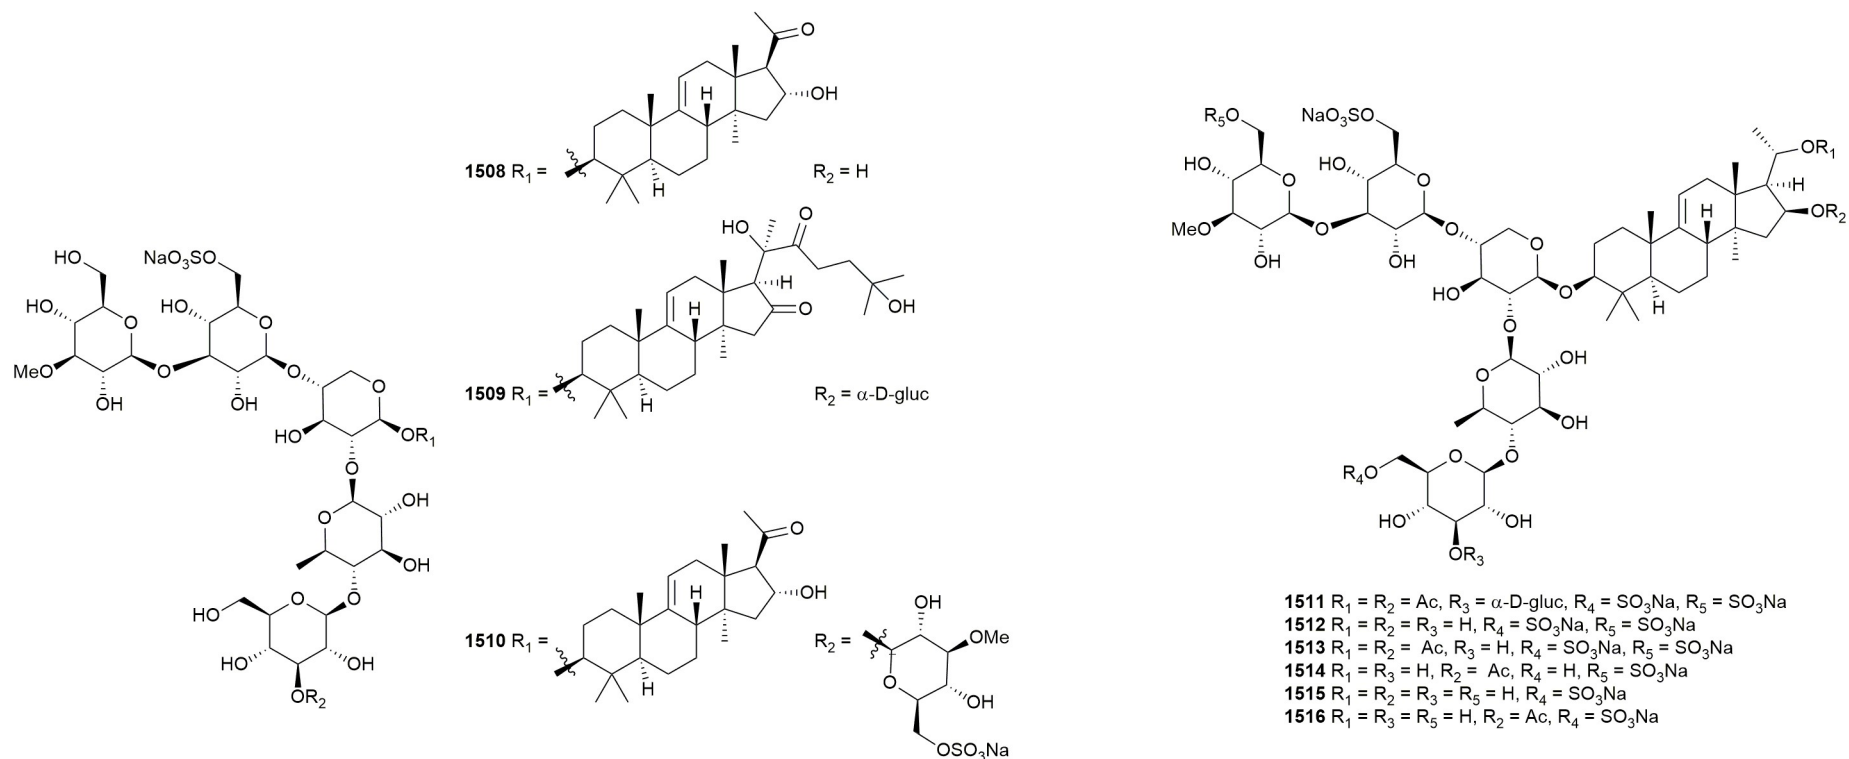

**707** Echinodermata *Thyonidium kurilensis* // Onkotan Island, Kurile Islands // Triterpene glycosides from the Far Eastern sea cucumber *Thyonidium* (= *Duasmodyctyla*) *kurilensis* (Levin): the structures, cytotoxicities, and biogenesis of kurilosides A3, D1, G, H, I, II, J, K, and K1

**1508** // N // kuriloside A3 // IA vs 1 murine TCL, 1 nMCL; non-hemolytic.

**1509** // N // kuriloside D1 // IA vs 1 murine TCL, 1 nMCL; non-hemolytic.

**1510** // N // kuriloside G // IA vs 1 murine TCL, 1 nMCL; non-hemolytic.

**1511** // N // kuriloside H // IA vs 1 murine TCL, weak cytotox. vs 1 nMCL; weak hemolytic.

**1512** // N // kuriloside I // IA vs 1 murine TCL, 1 nMCL; non-hemolytic.

**1513** // N // kuriloside II // IA vs 1 murine TCL, 1 nMCL; non-hemolytic.

**1514** // N // kuriloside J // IA vs 1 murine TCL, 1 nMCL; non-hemolytic.

**1515** // N // kuriloside K // IA vs 1 murine TCL, 1 nMCL; non-hemolytic.

**1516** // N // kuriloside K1 // IA vs 1 murine TCL, 1 nMCL; non-hemolytic.

12 Miscellaneous

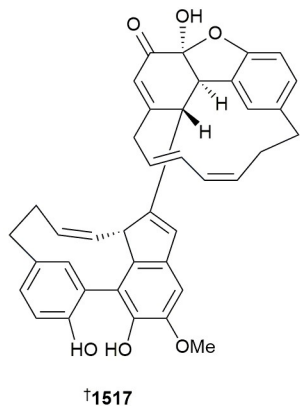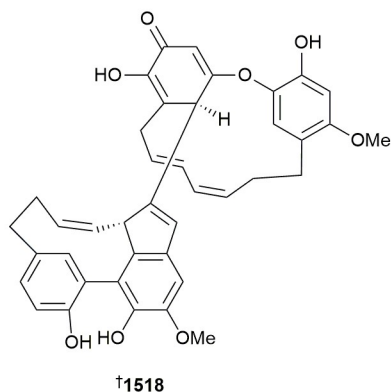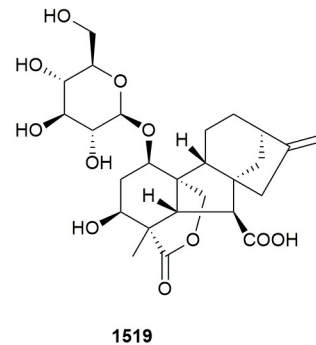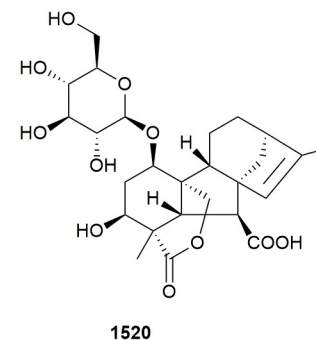

- 725** Tracheophyta *Zostera marina* // Olympiazentrum Schilksee, Kiel, Schleswig-Holstein, Germany // Stable catechol keto tautomers in cytotoxic heterodimeric cyclic diarylheptanoids from the seagrass *Zostera marina*  
**1517** // N // zosterabisphenone A // IA to weak cytotox. vs 2 HTCLs.  
**1518** // N // zosterabisphenone B // IA vs 2 HTCLs.
- 726** Tracheophyta *Enhalus acoroides* // Xincun Bay, Hainan Province, China // Two novel diterpenes from the stems and leaves of tropical seagrass *Enhalus acoroides* in the South China sea  
**1519** // N // enhoidin A // IA vs 4 HTCLs.  
**1520** // N // enhoidin B // IA vs 4 HTCLs.
